# Supplementary material for: Reformulating atmospheric aerosol thermodynamics and hygroscopic growth into fog, haze and clouds
Source: Copernicus journal article supplement (doi:10.5194/acp-7-3163-2007), 2007-06-20

# Phosphoric acid - H<sub>3</sub>PO<sub>4</sub>

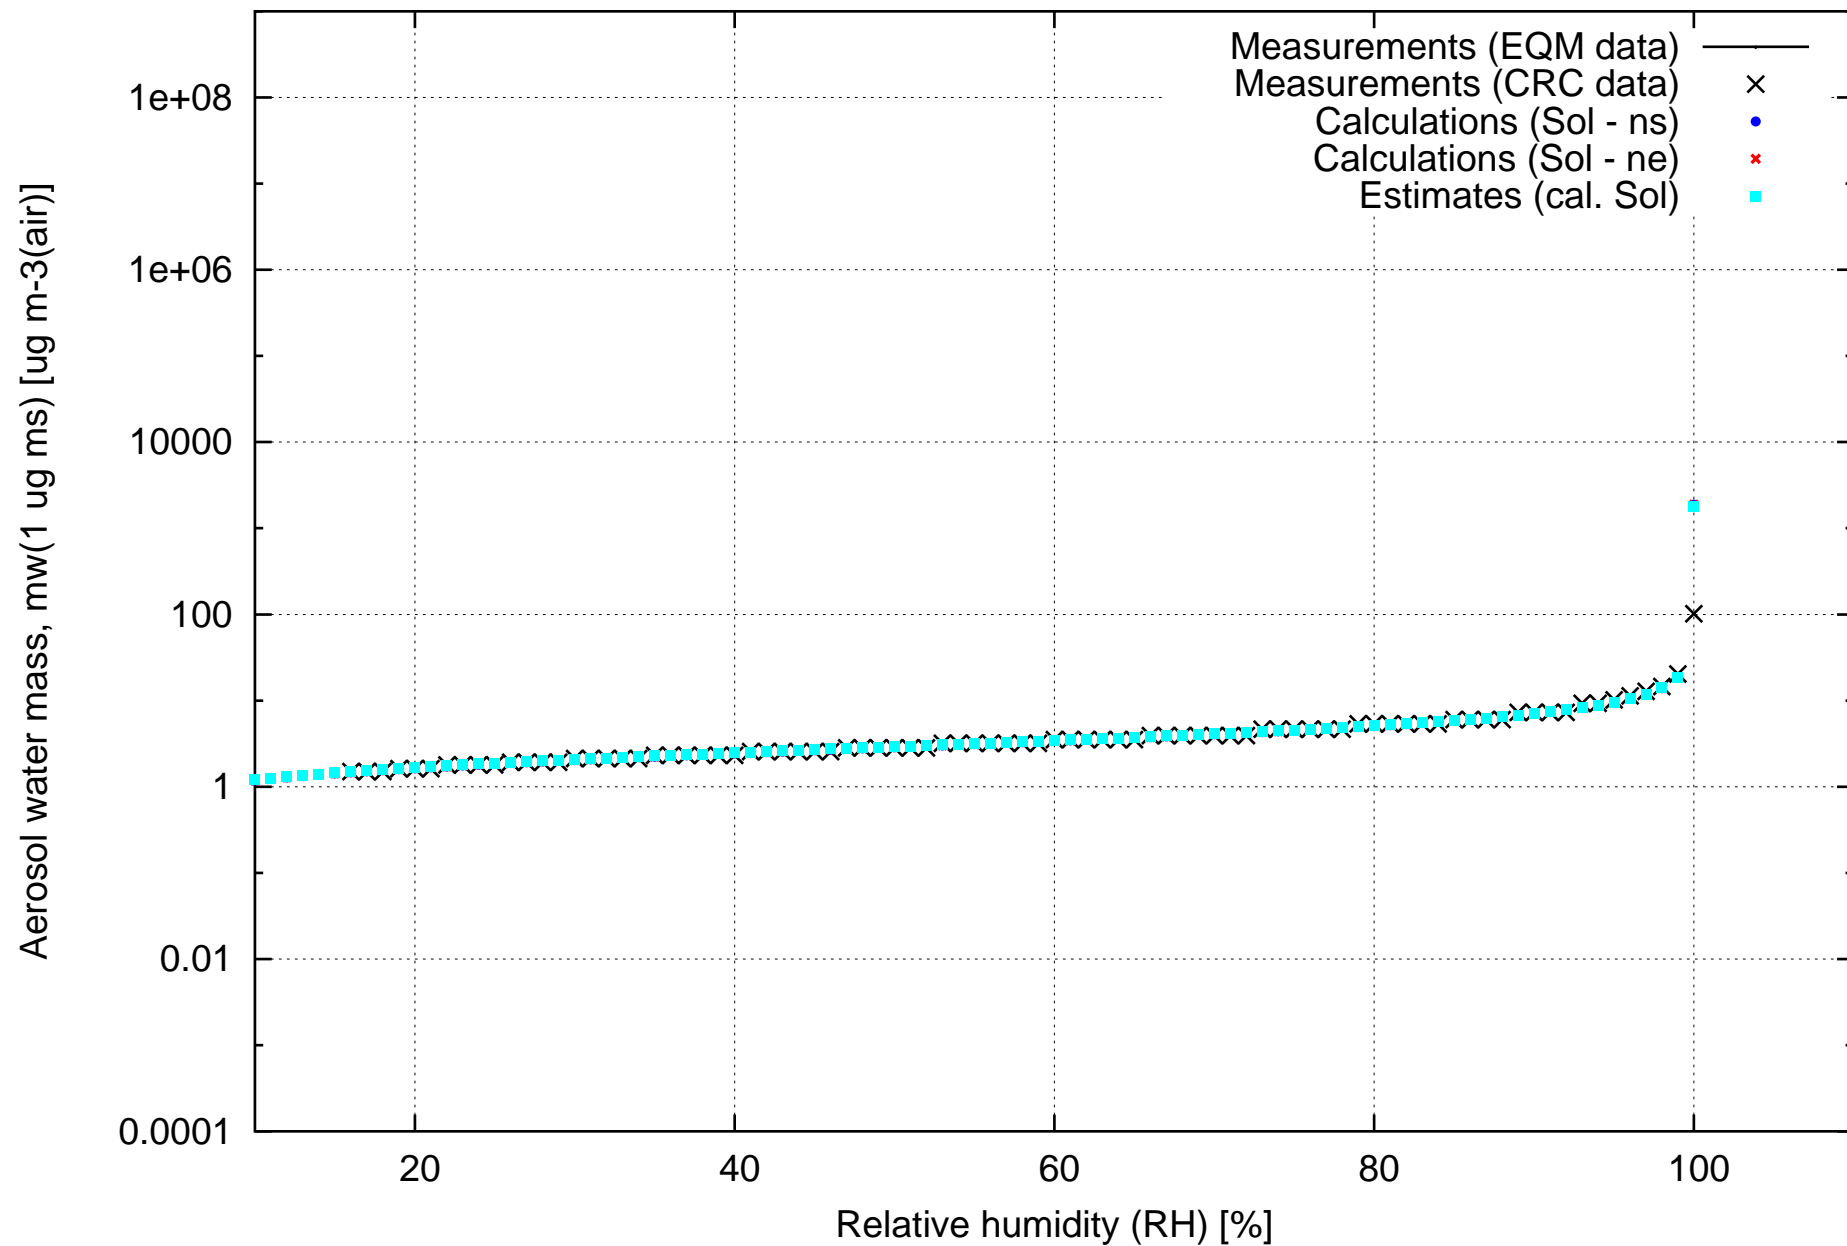

# Sulfuric acid - H<sub>2</sub>SO<sub>4</sub>

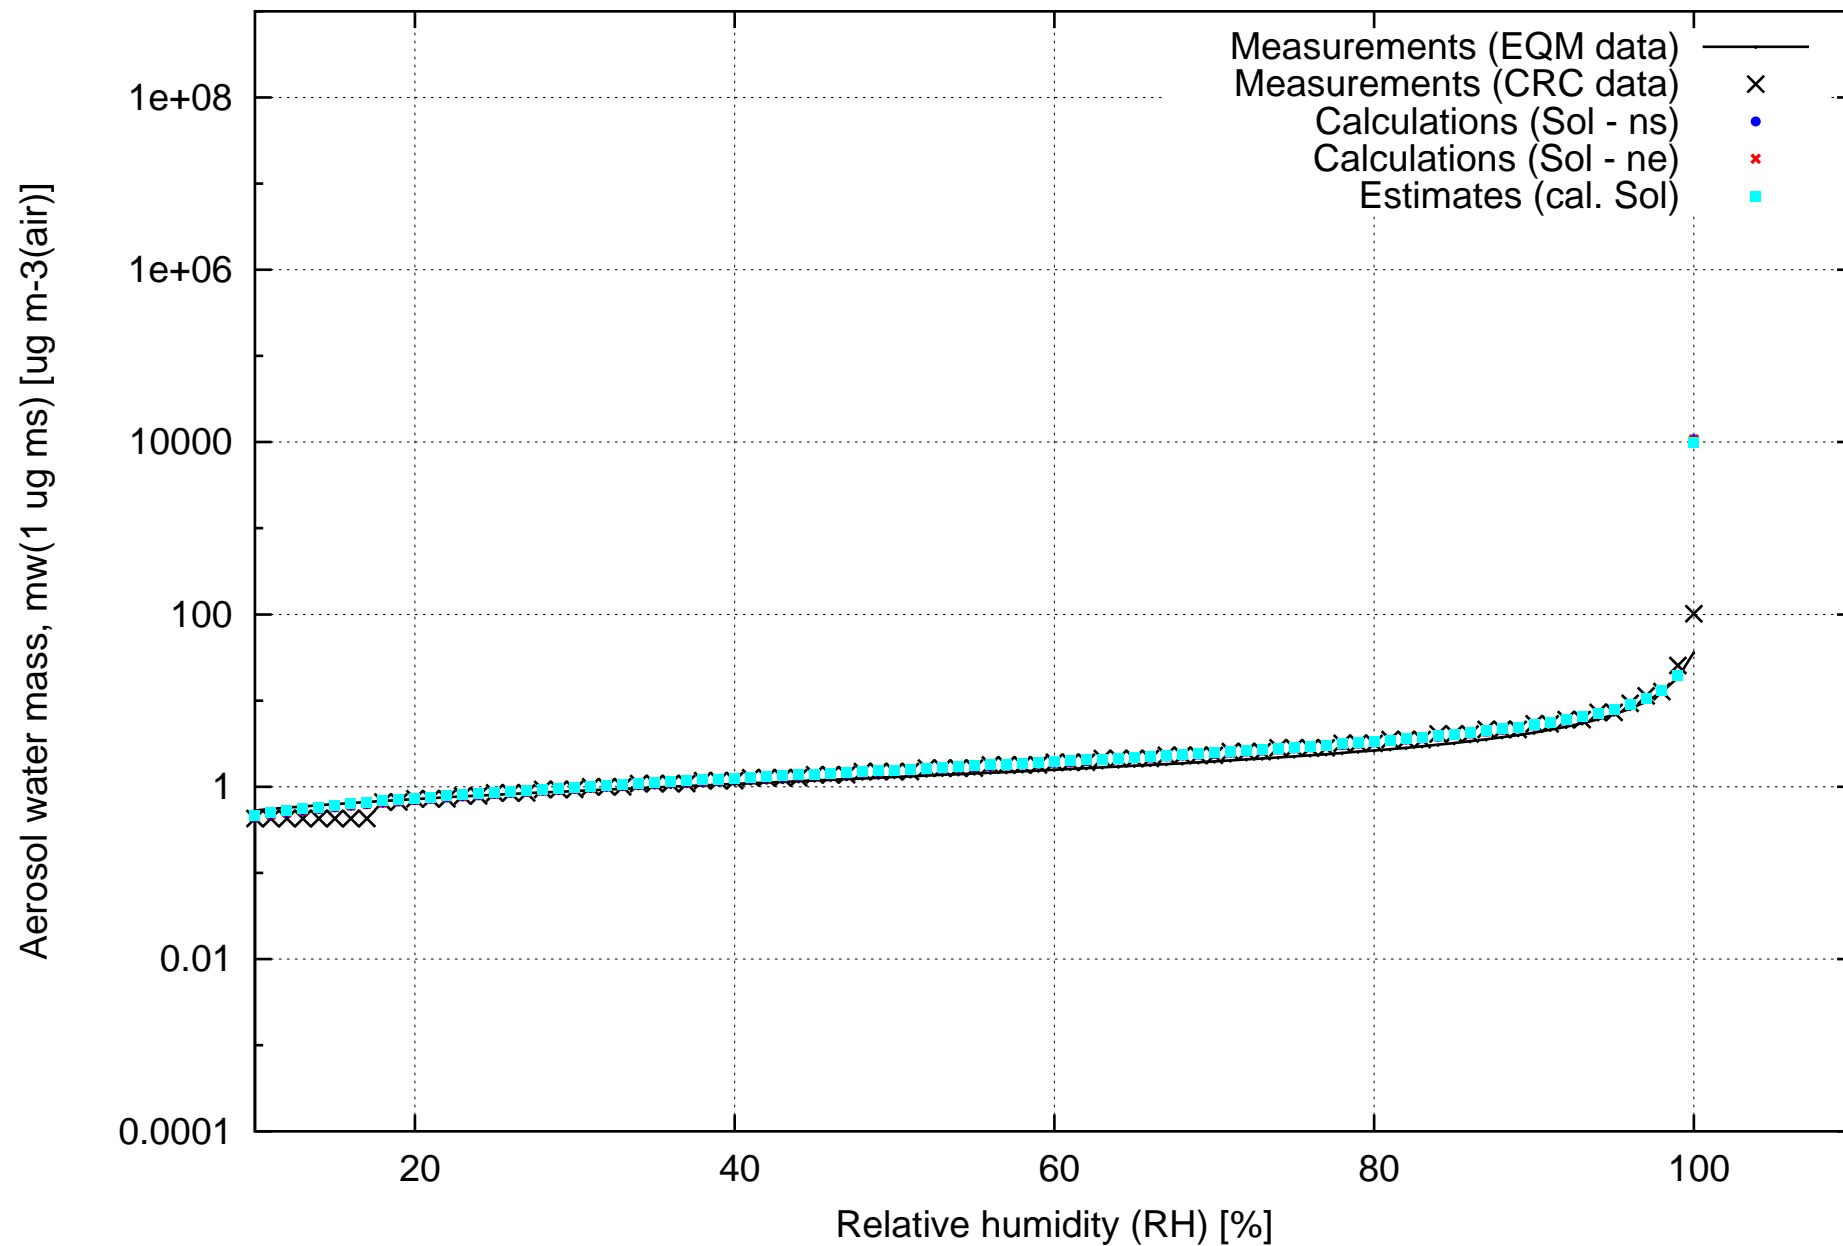

# Hydrogen - dummy 03

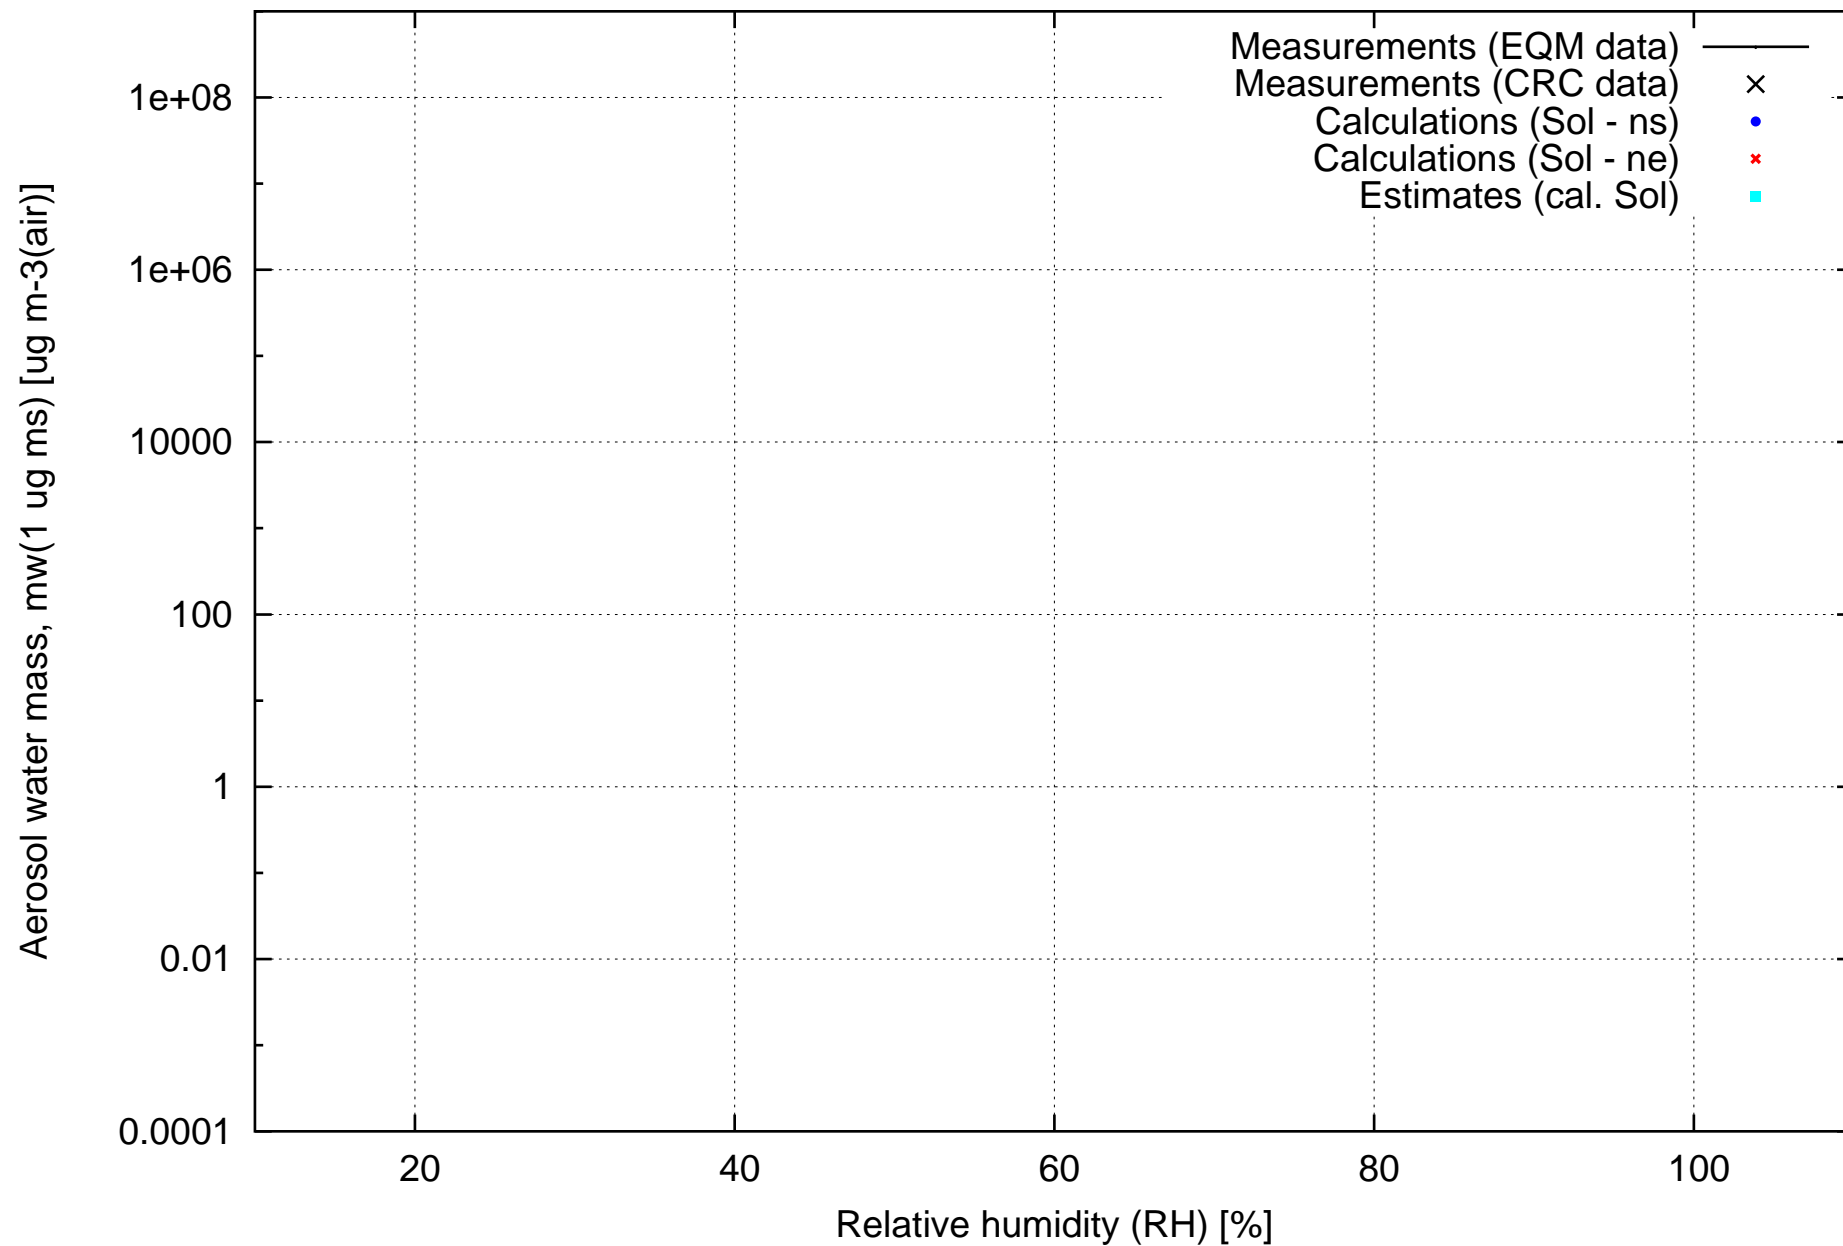

# Nitric acid - HNO<sub>3</sub>

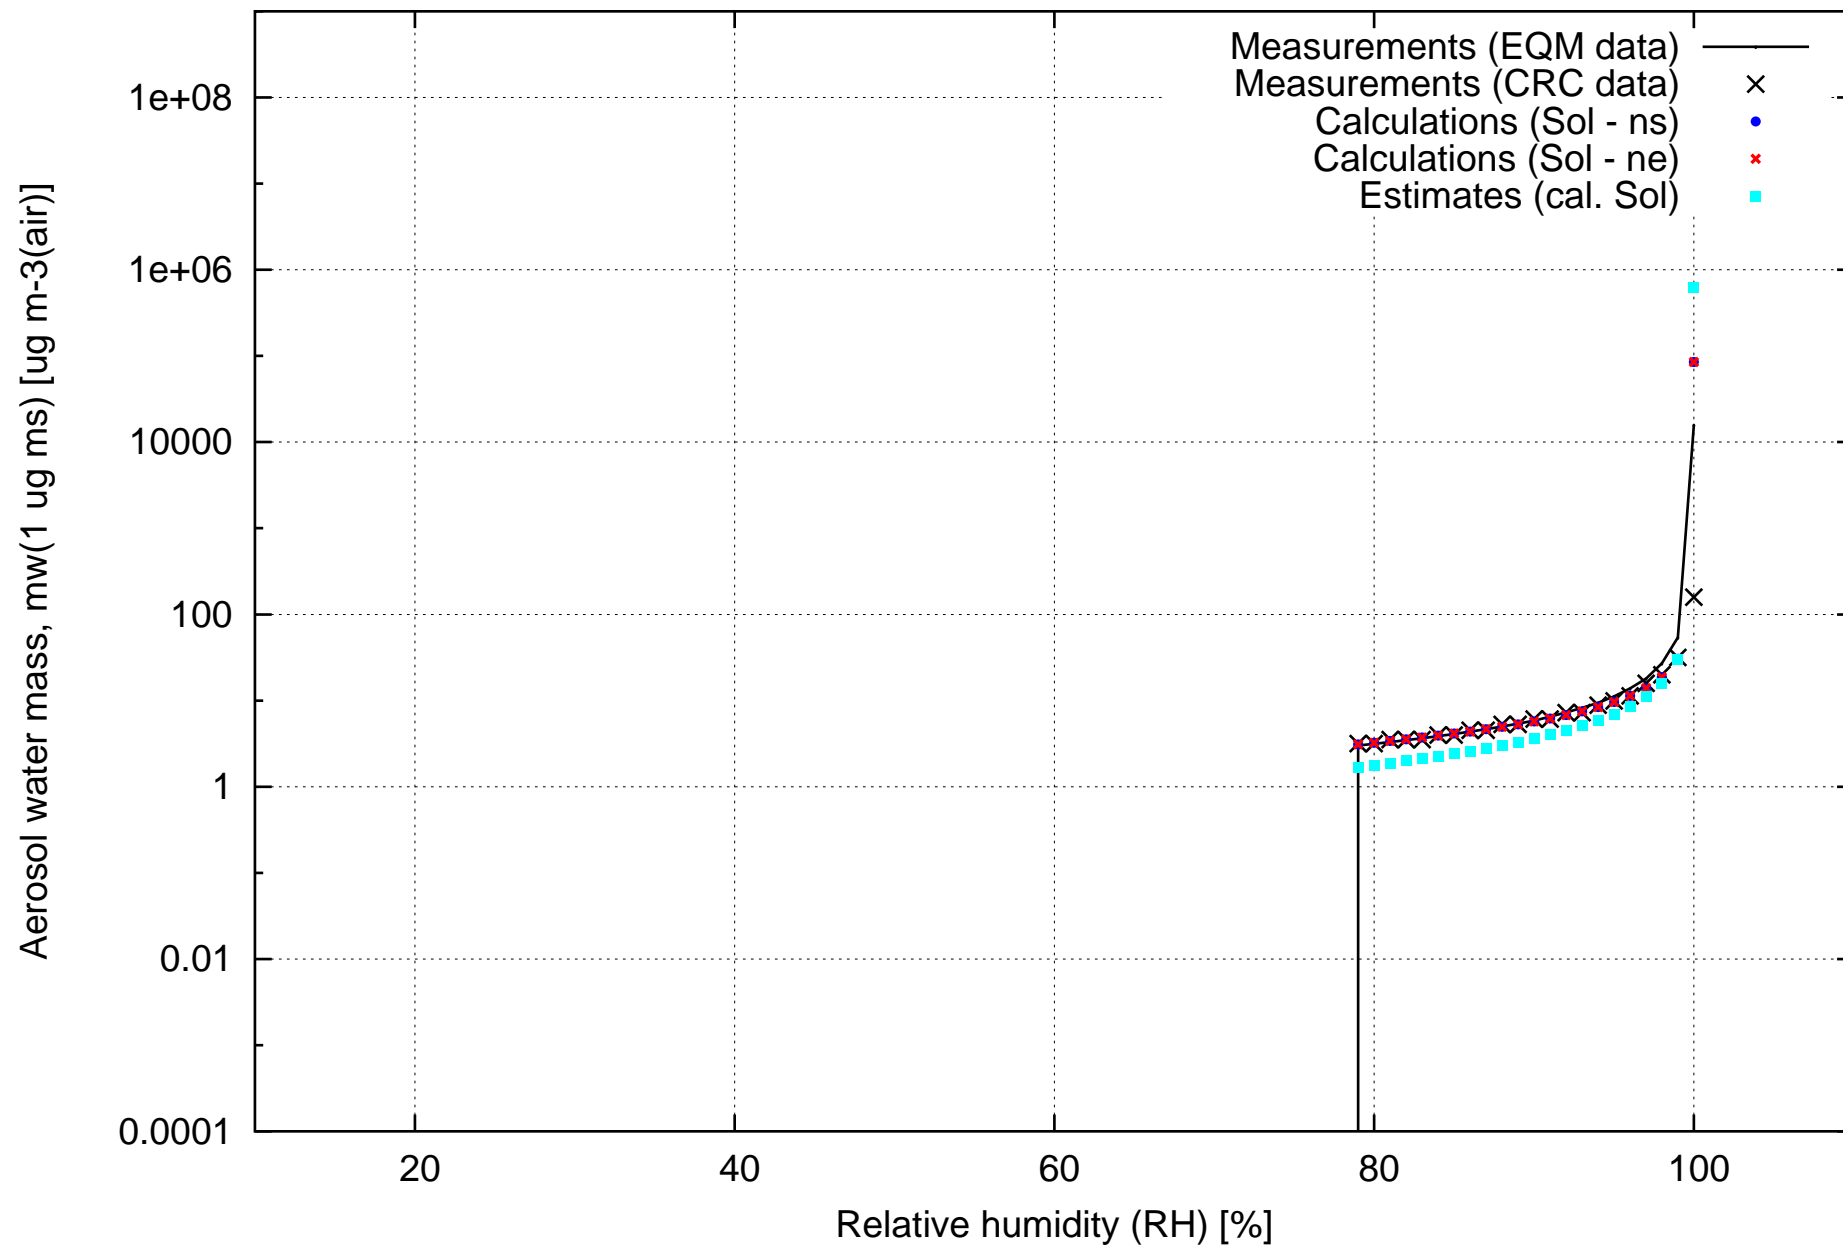

# Hydrogen chloride - HCl

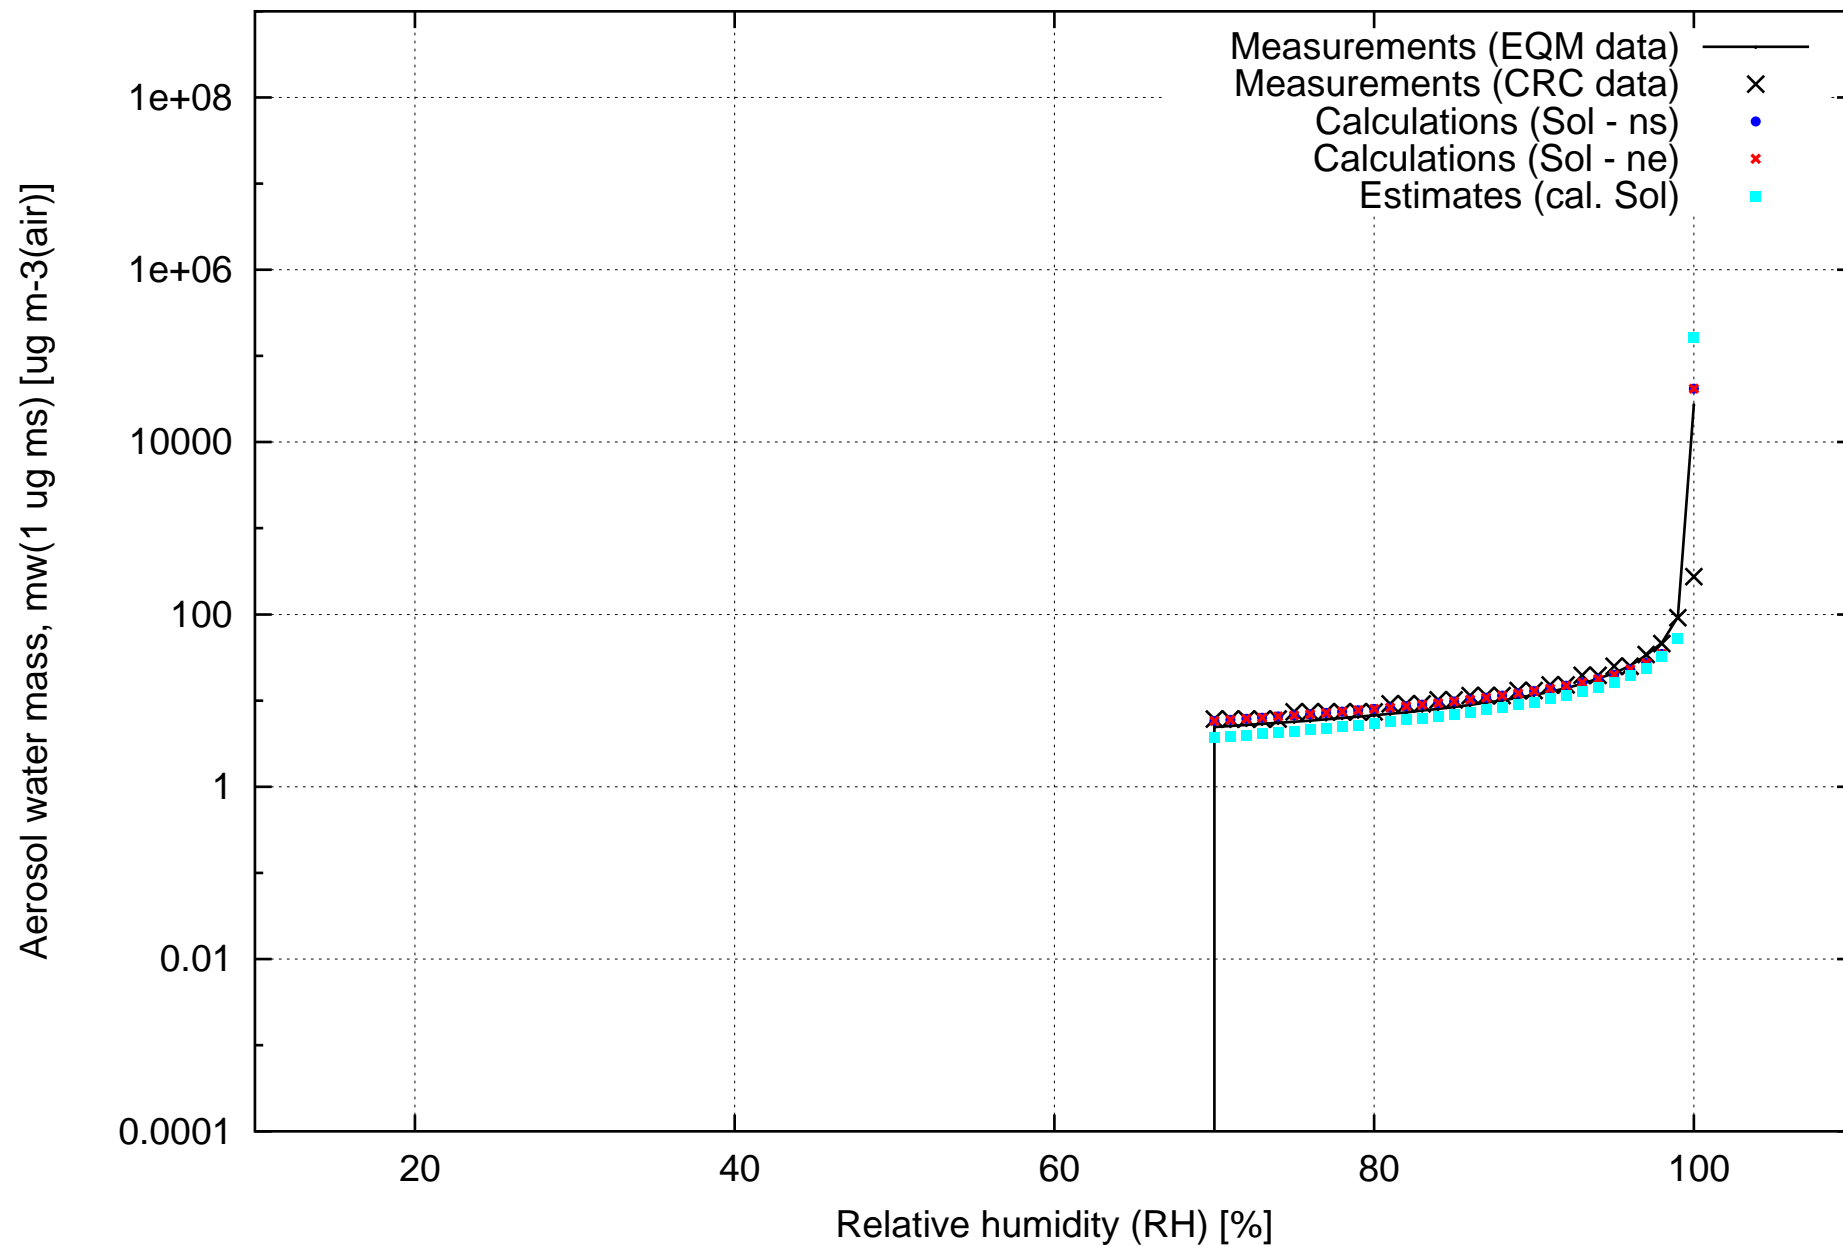

# Hydrogen bromide - HBr

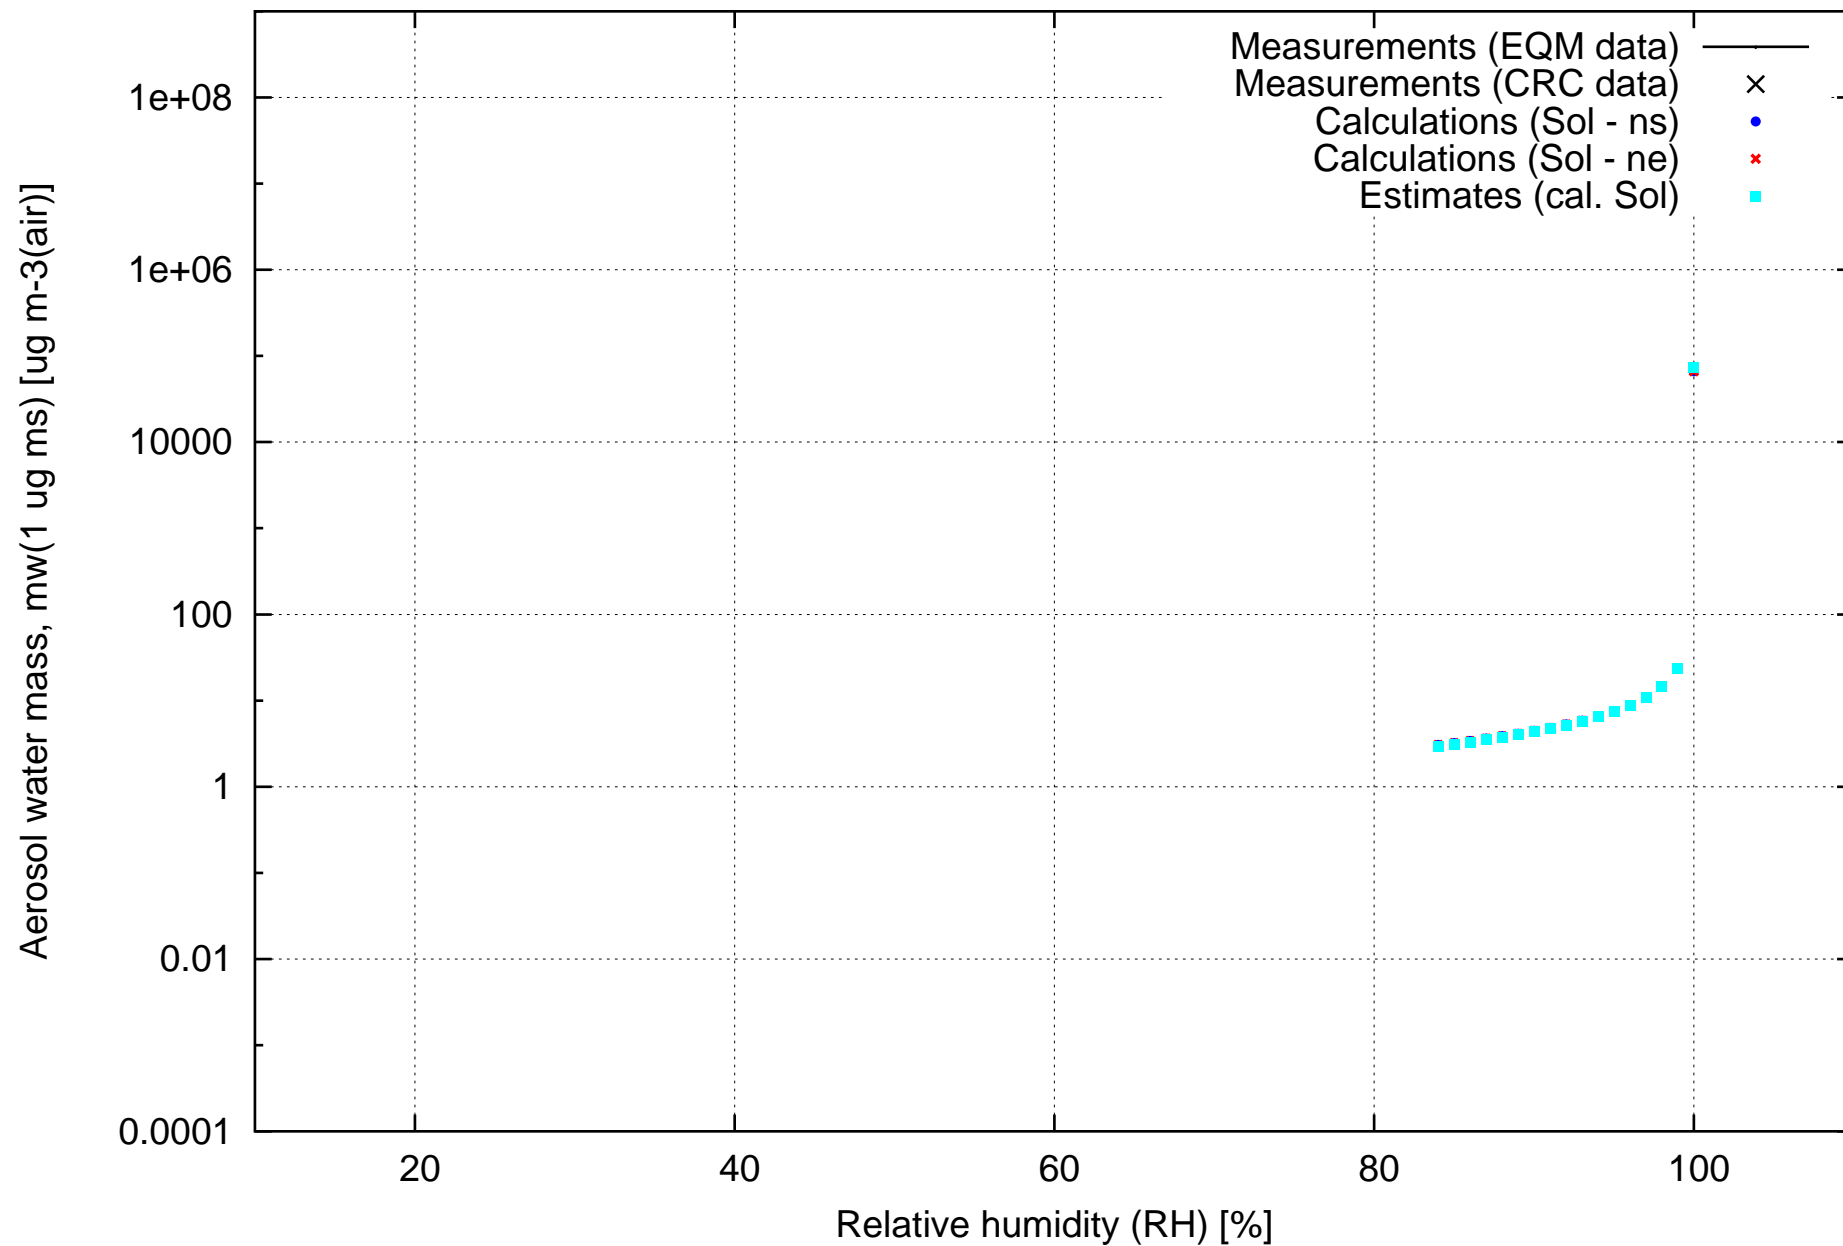

# Hydrogen iodide - HI

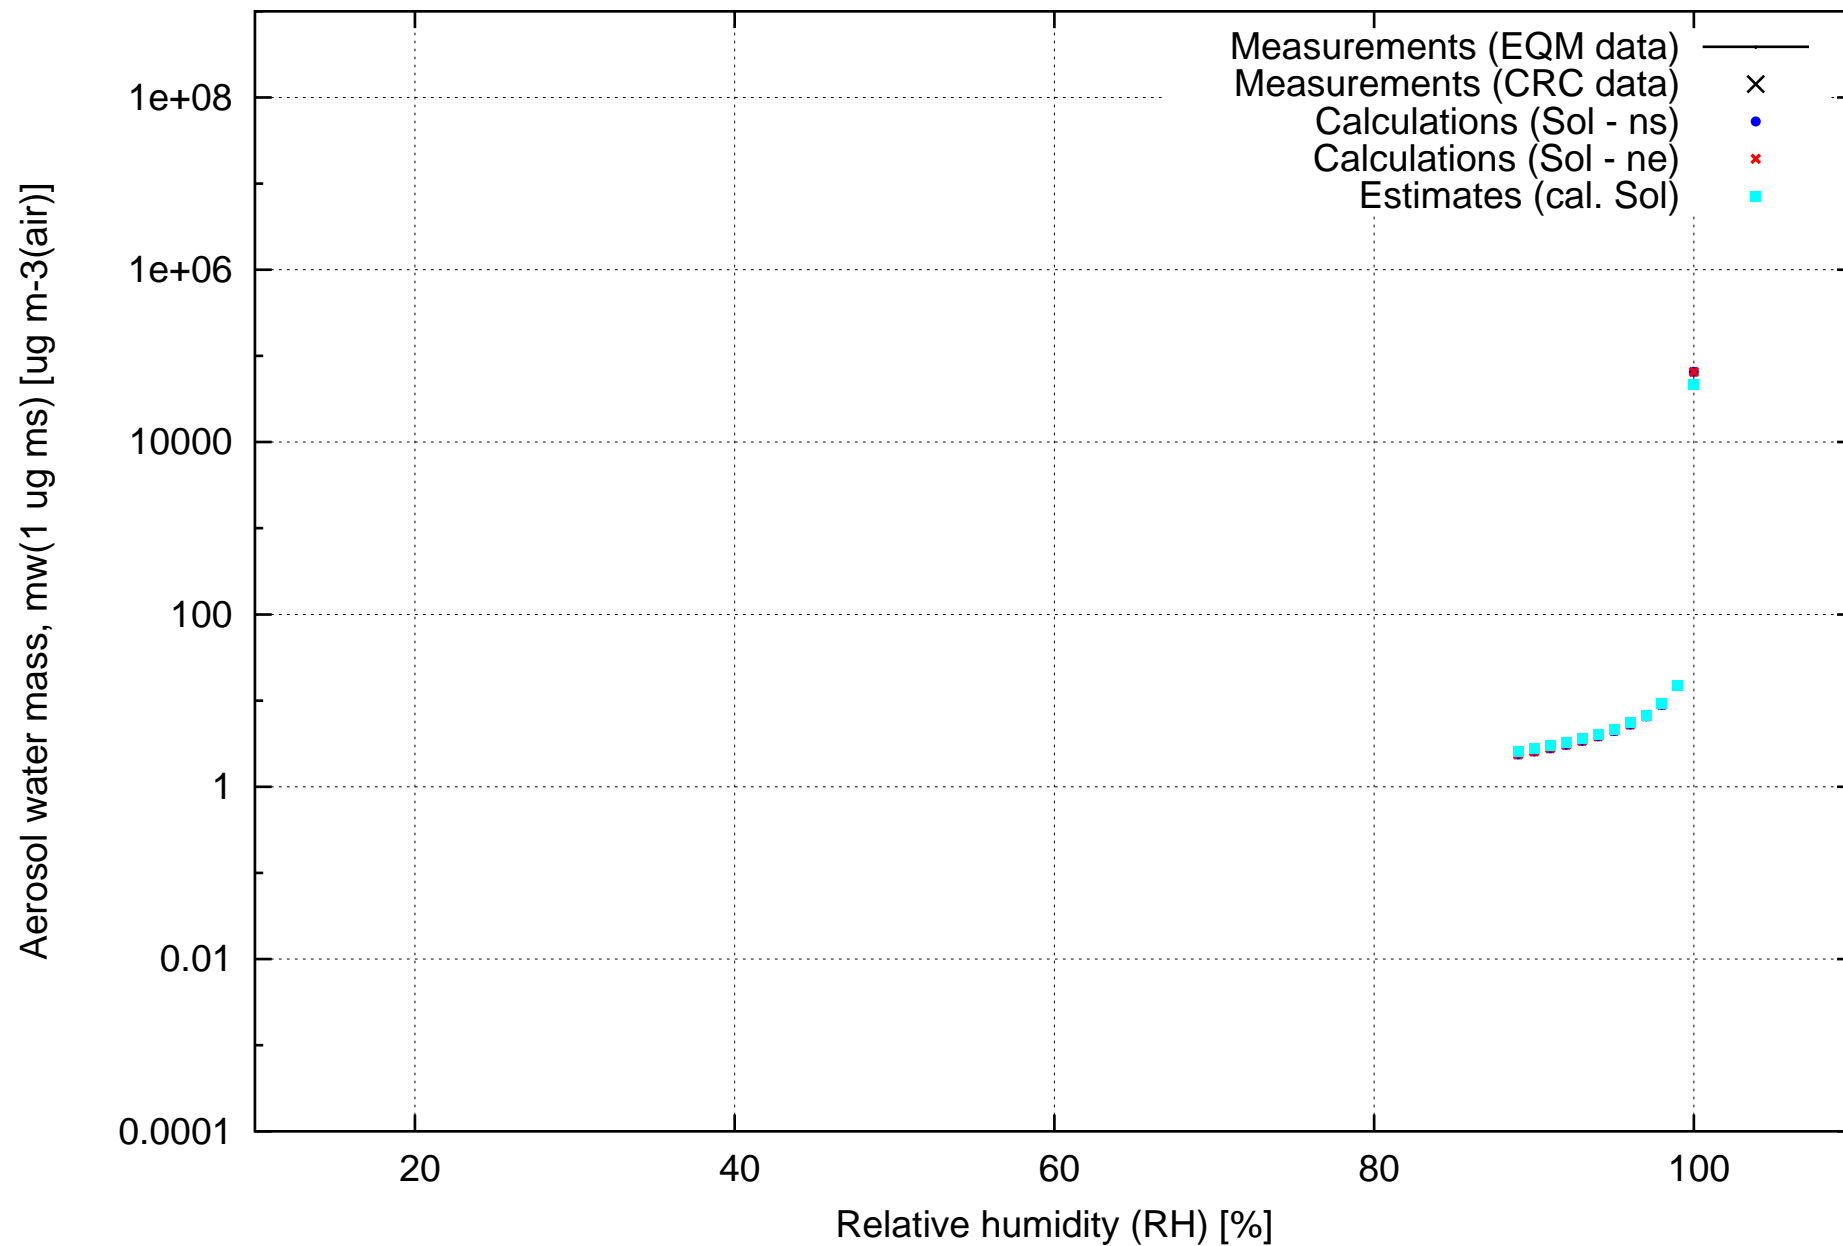

# Carbonic acid - H2CO3

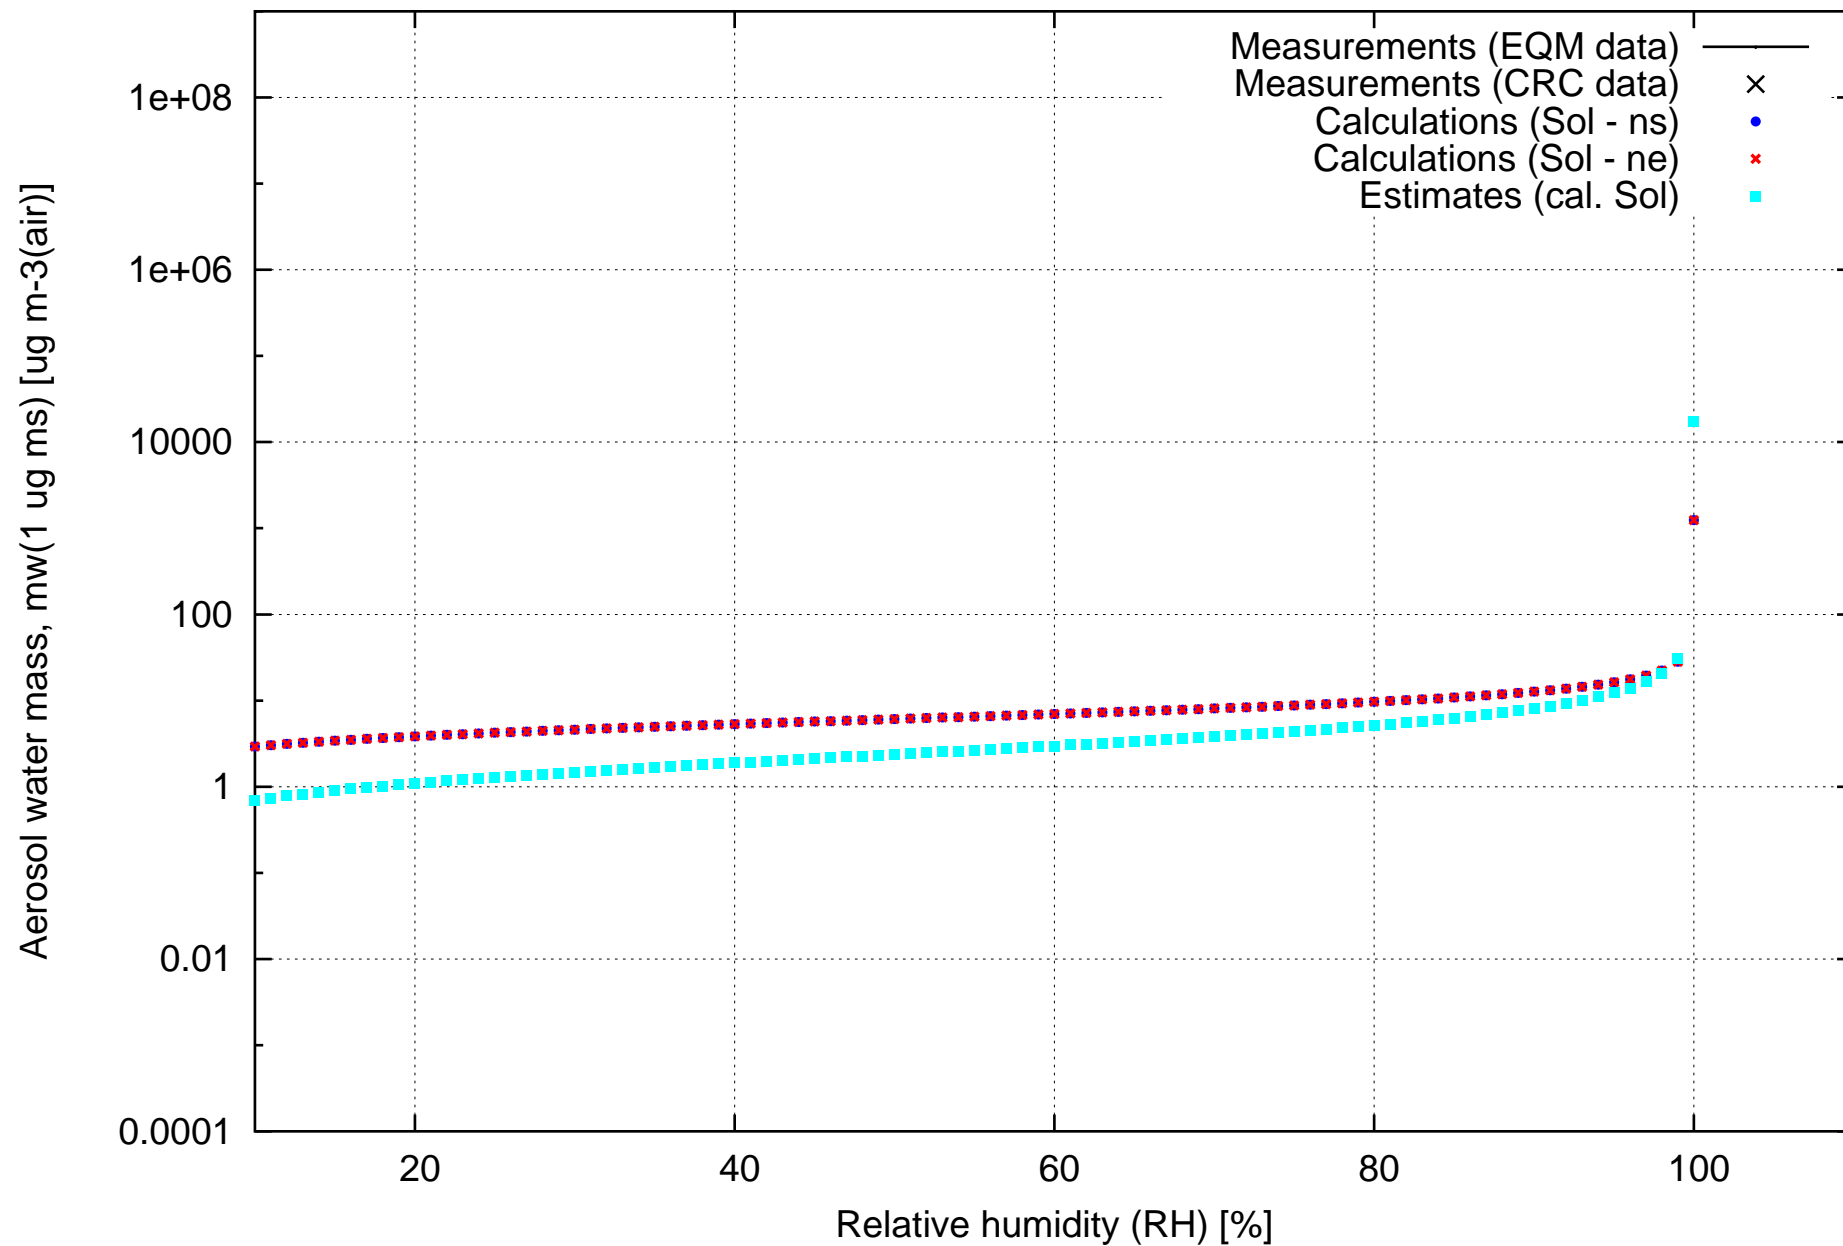



# Hydrogen - dummy 09



# Water - H2O

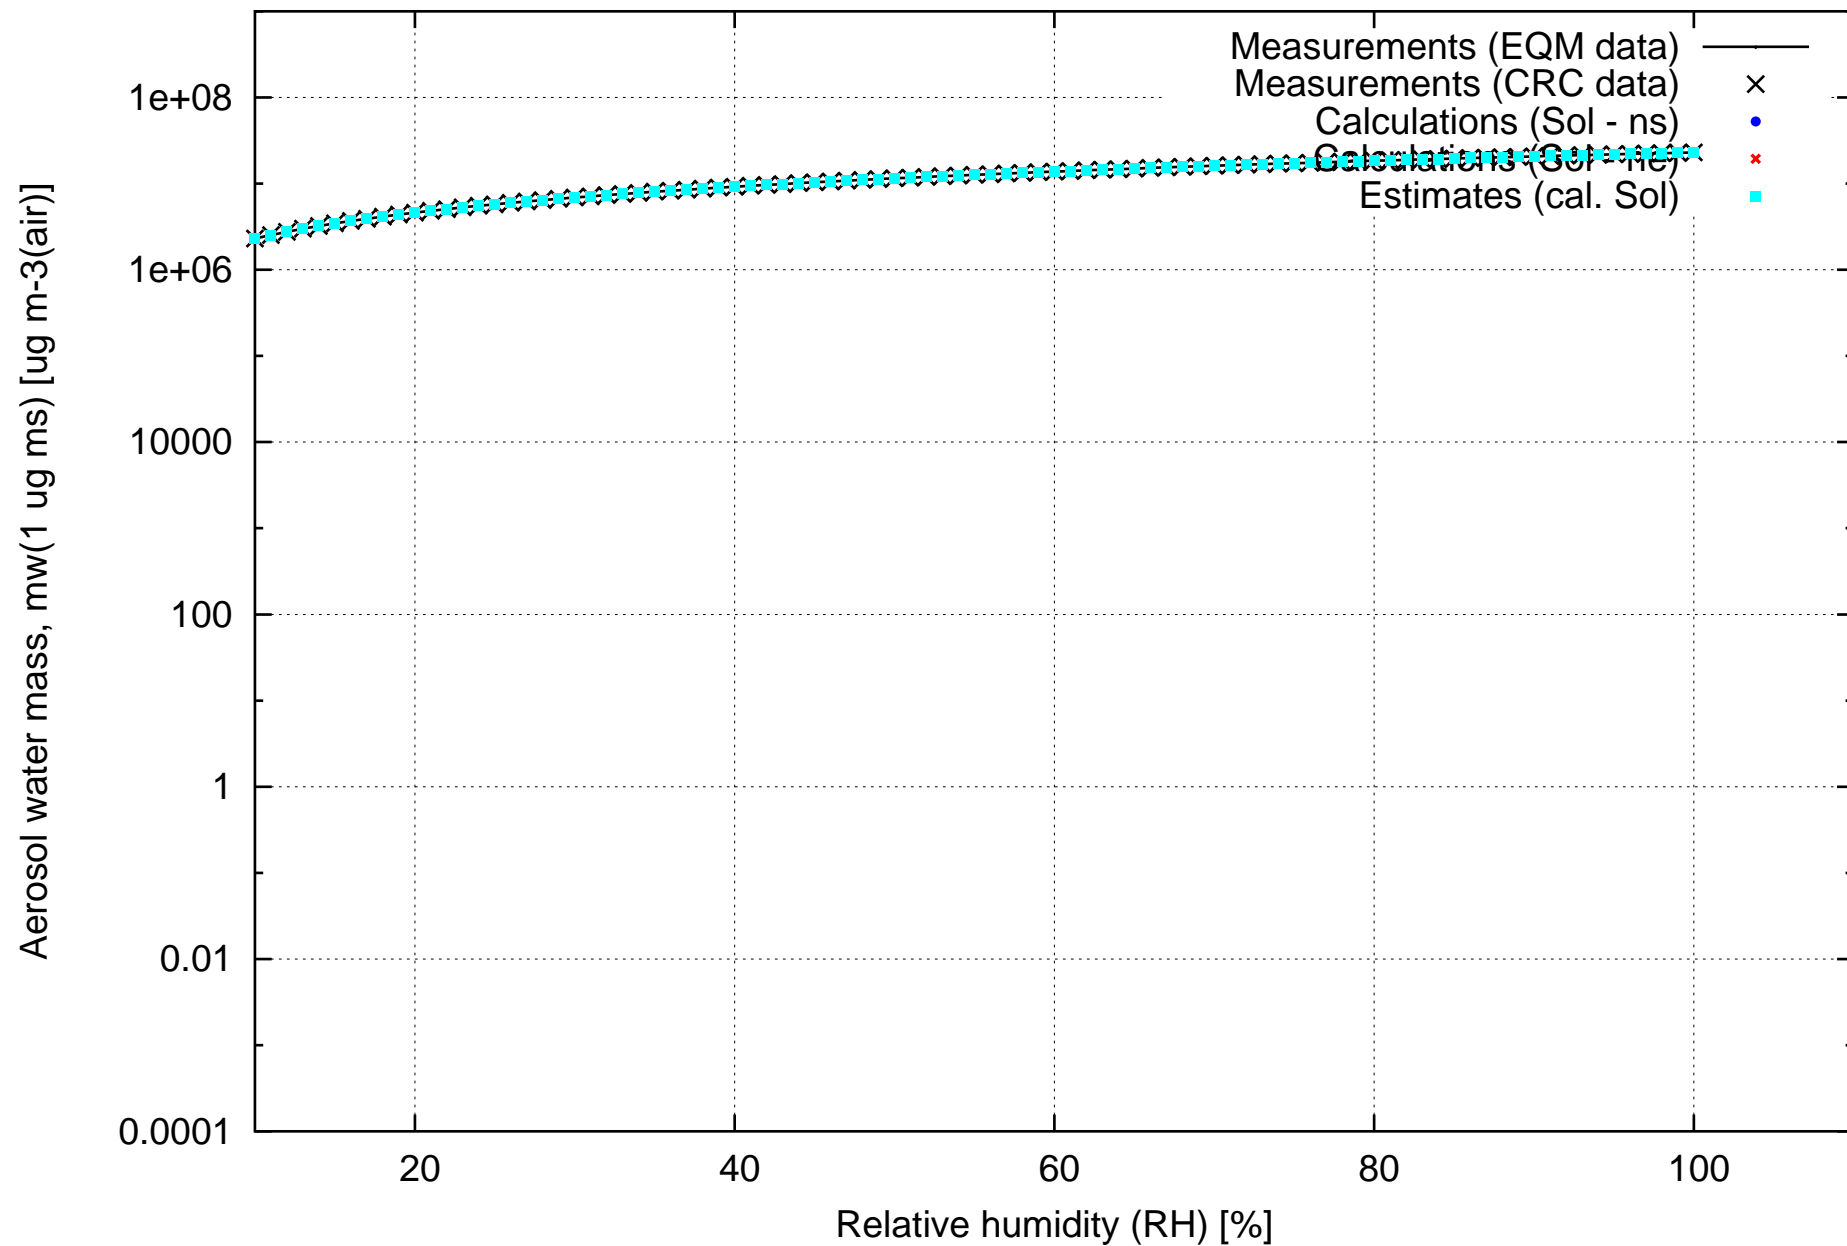

Formic acid - CH<sub>2</sub>O<sub>2</sub> = H(COOH)

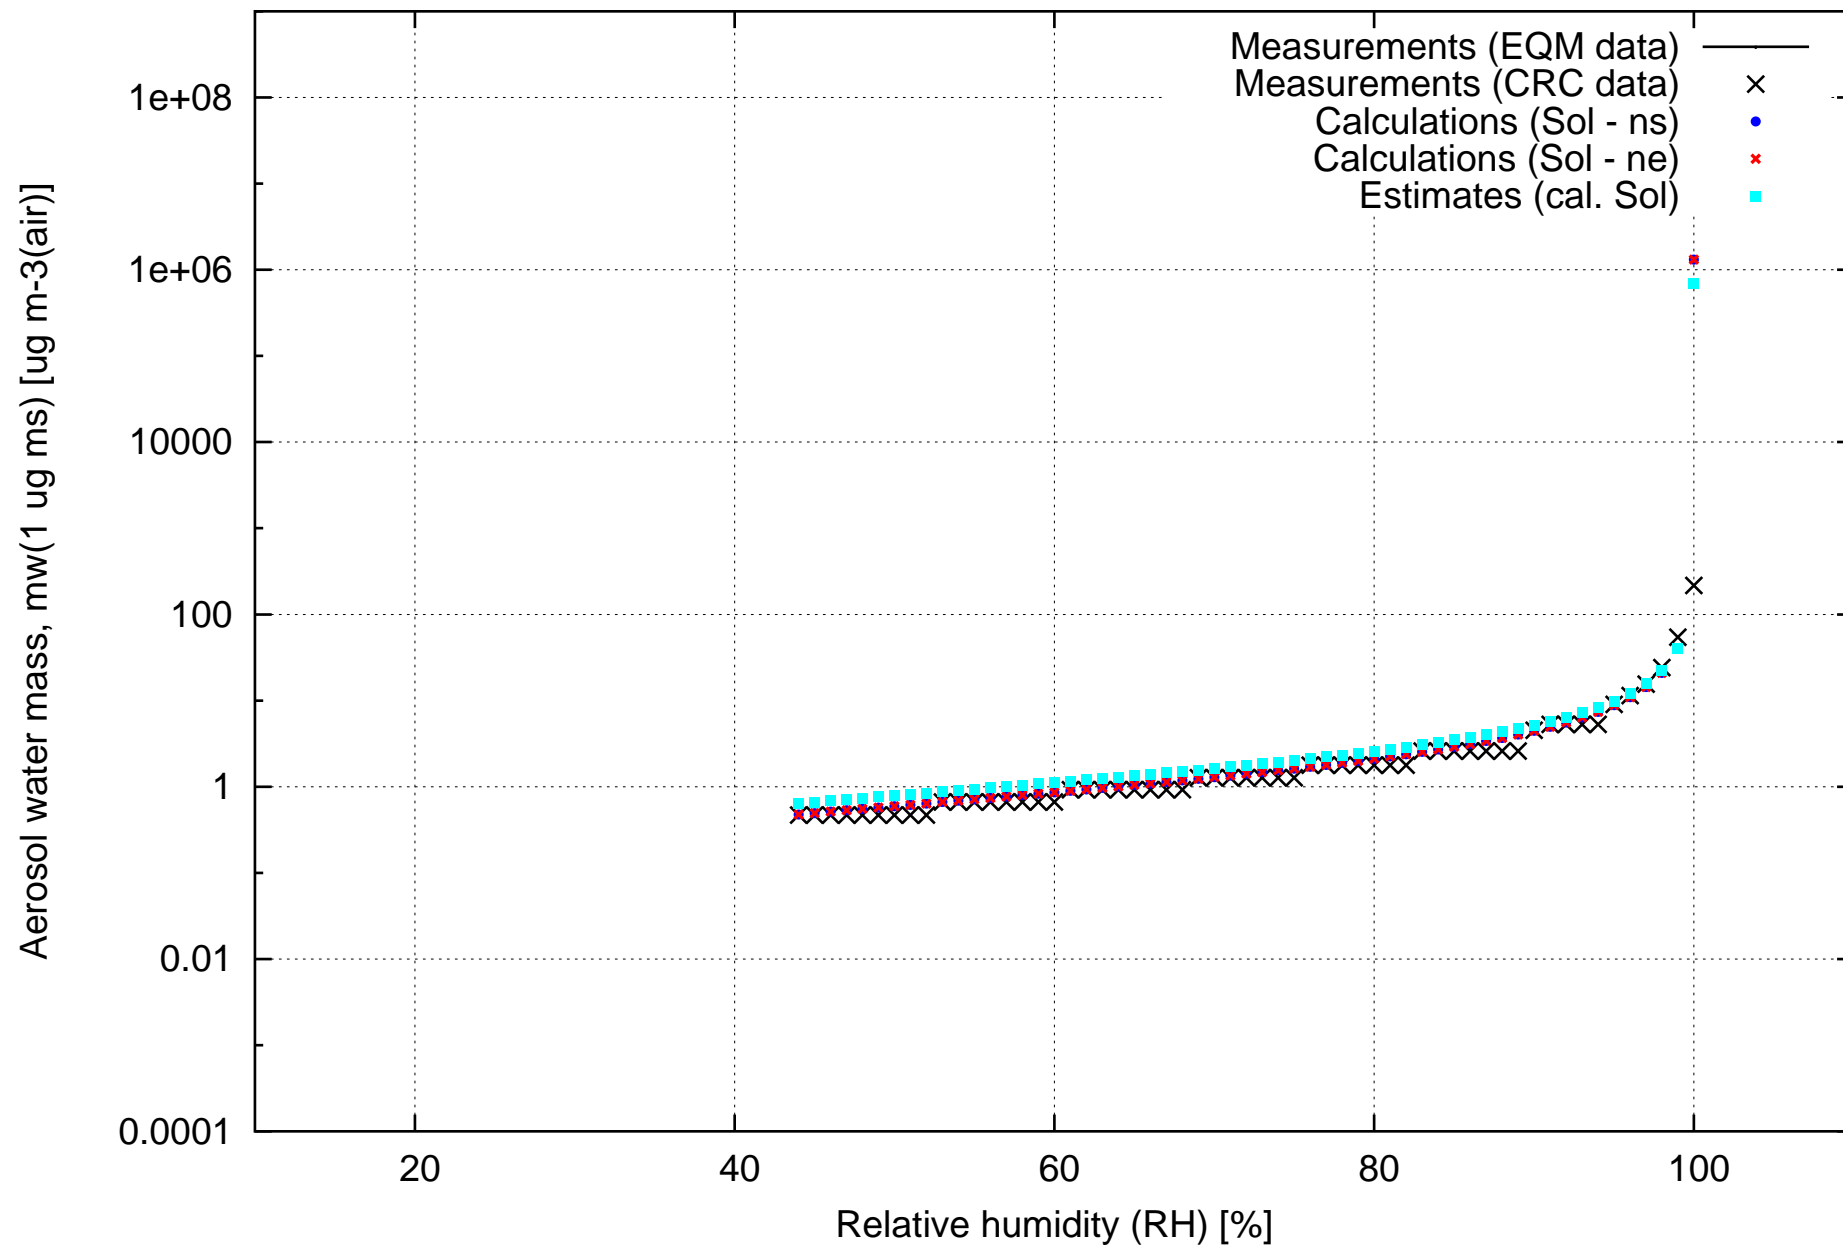

Acetic acid - C<sub>2</sub>H<sub>4</sub>O<sub>2</sub> = CH<sub>3</sub>(COOH)

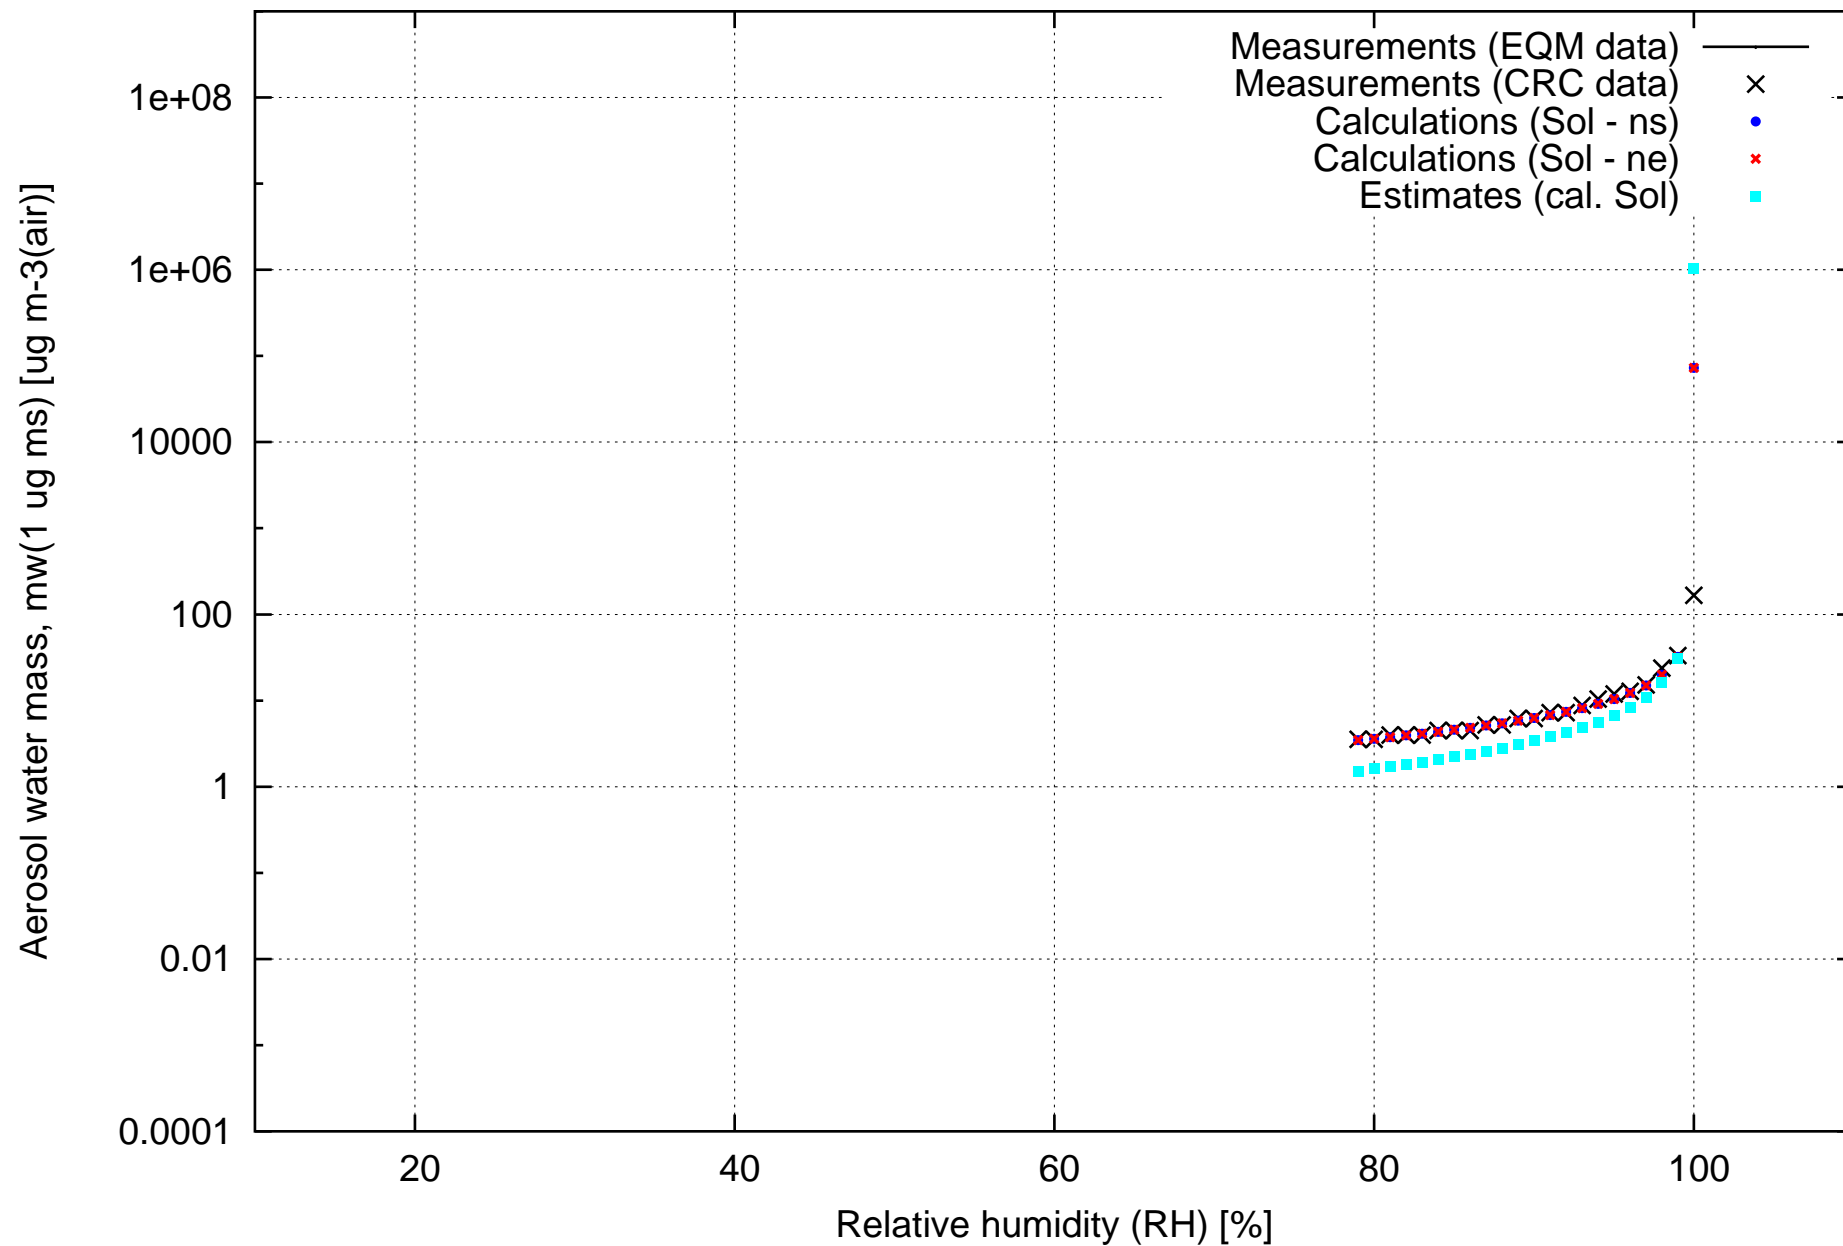

Oxalic acid -  $\text{C}_2\text{H}_2\text{O}_4 = (\text{COOH})_2$

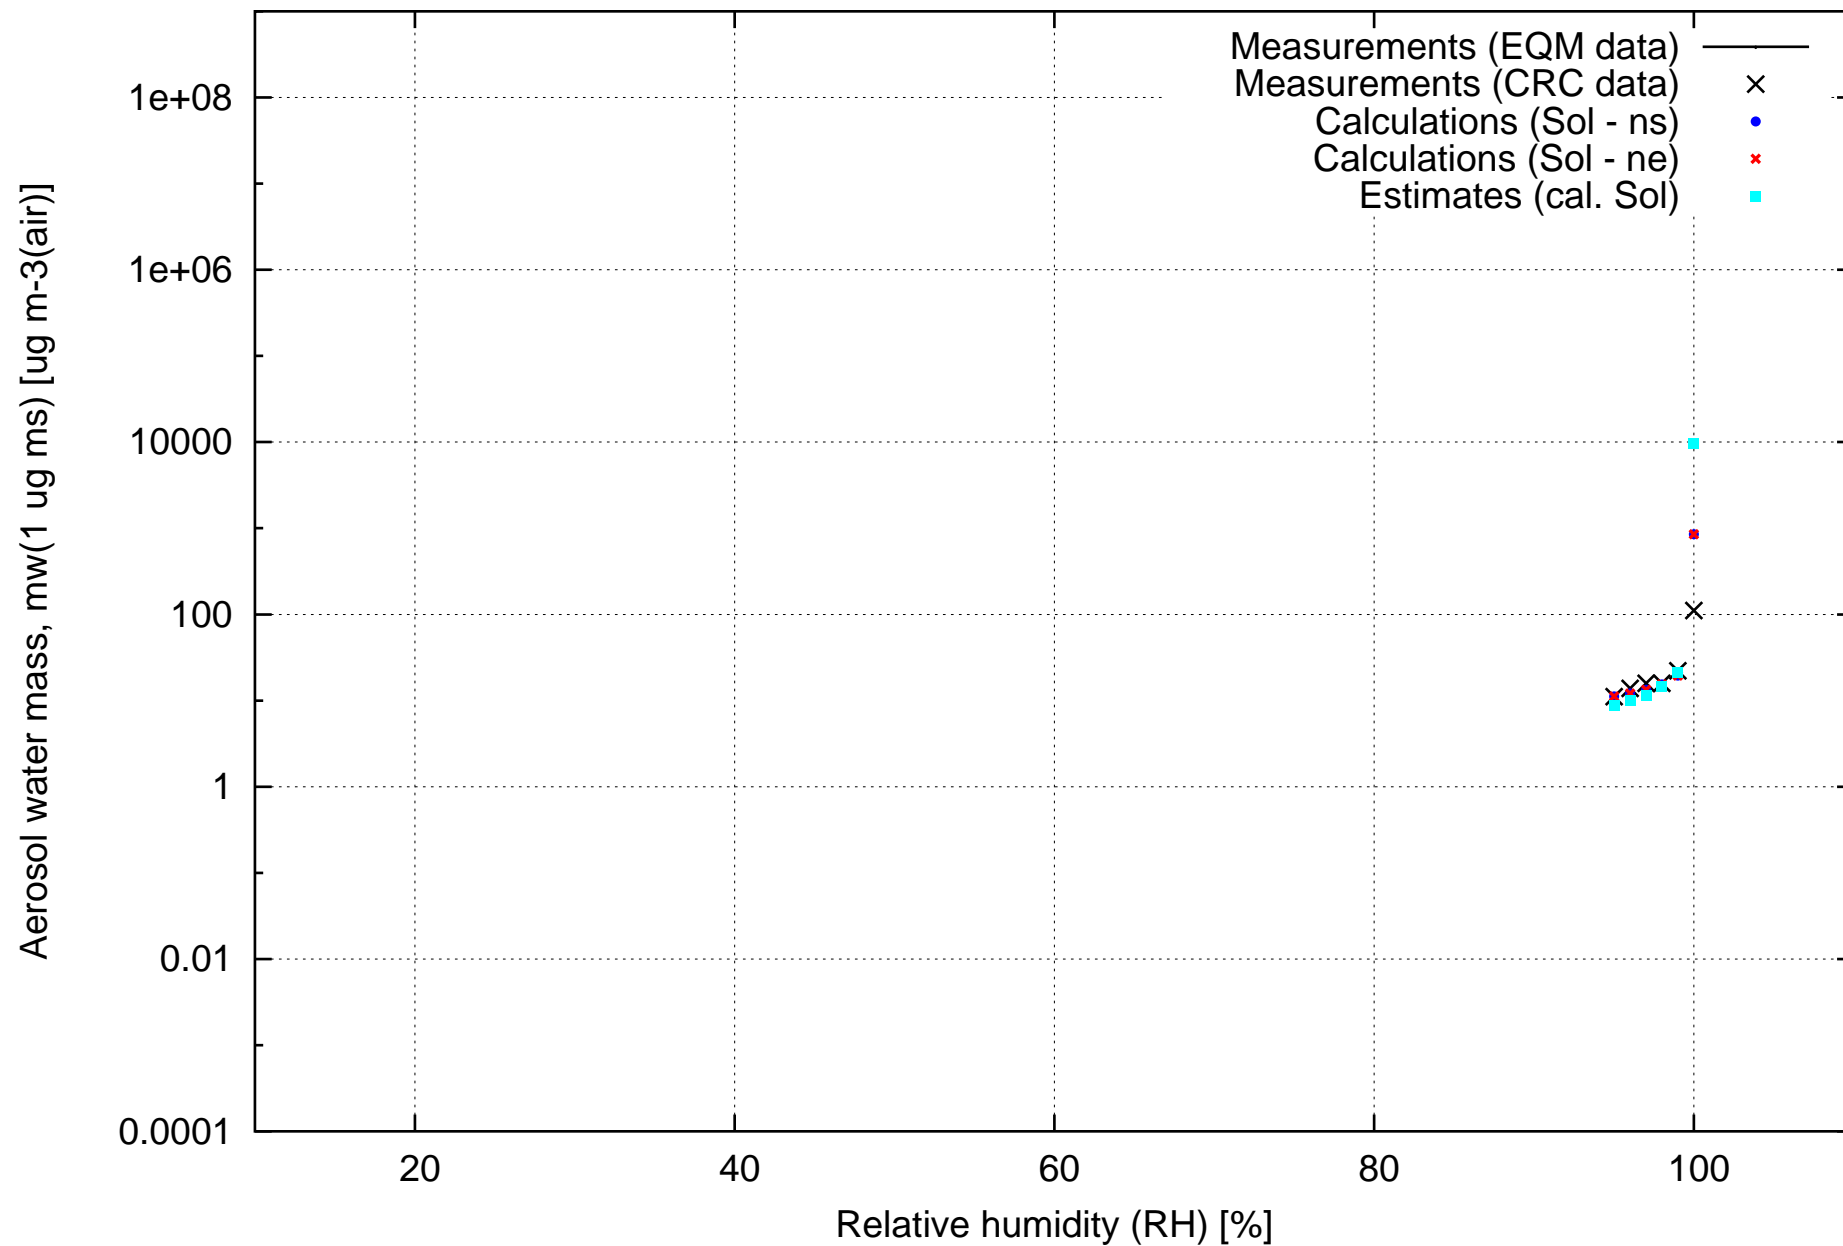

Citric acid - C<sub>6</sub>H<sub>8</sub>O<sub>7</sub> = (HO)C(COOH)<sub>3</sub>

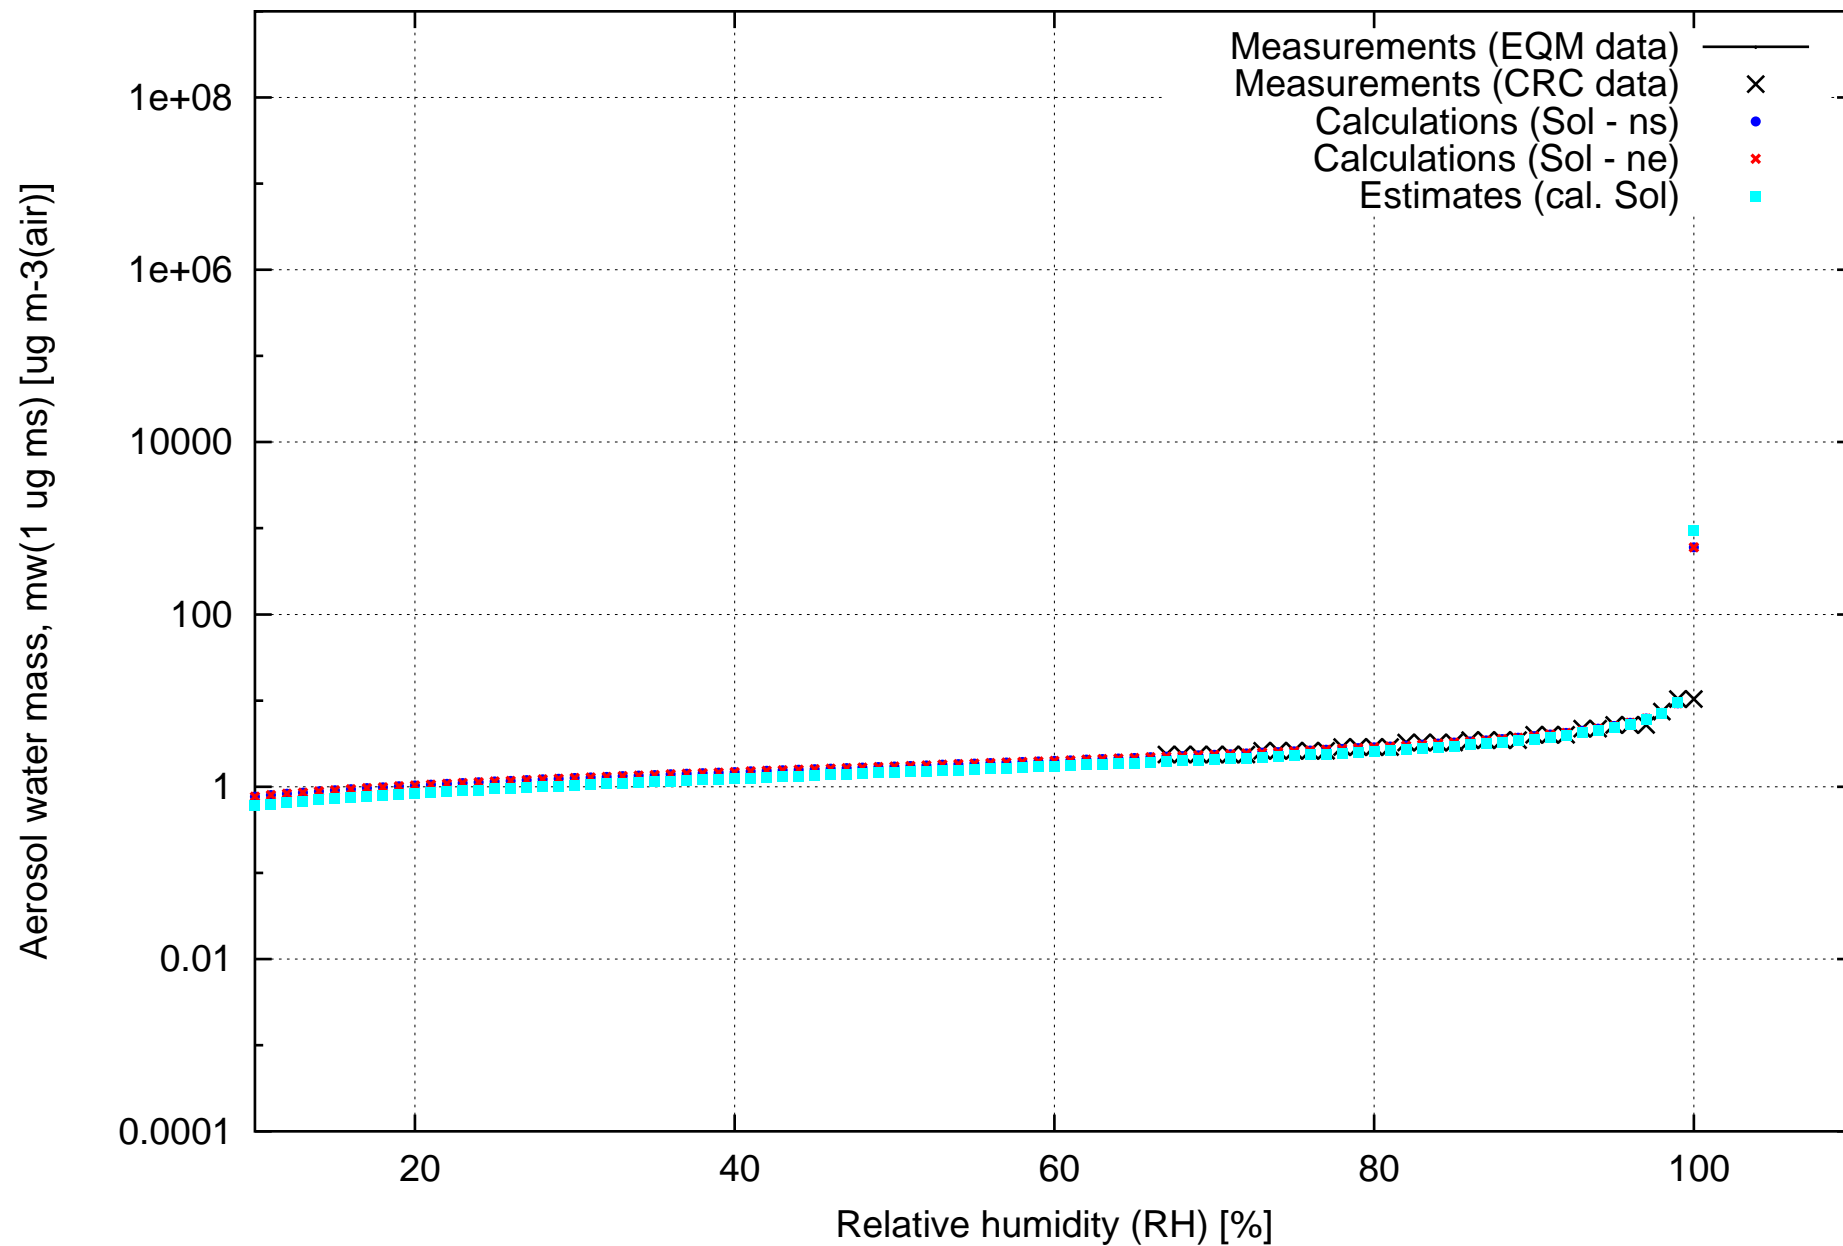

# Ammonium phosphate - (NH<sub>4</sub>)<sub>3</sub>PO<sub>4</sub>

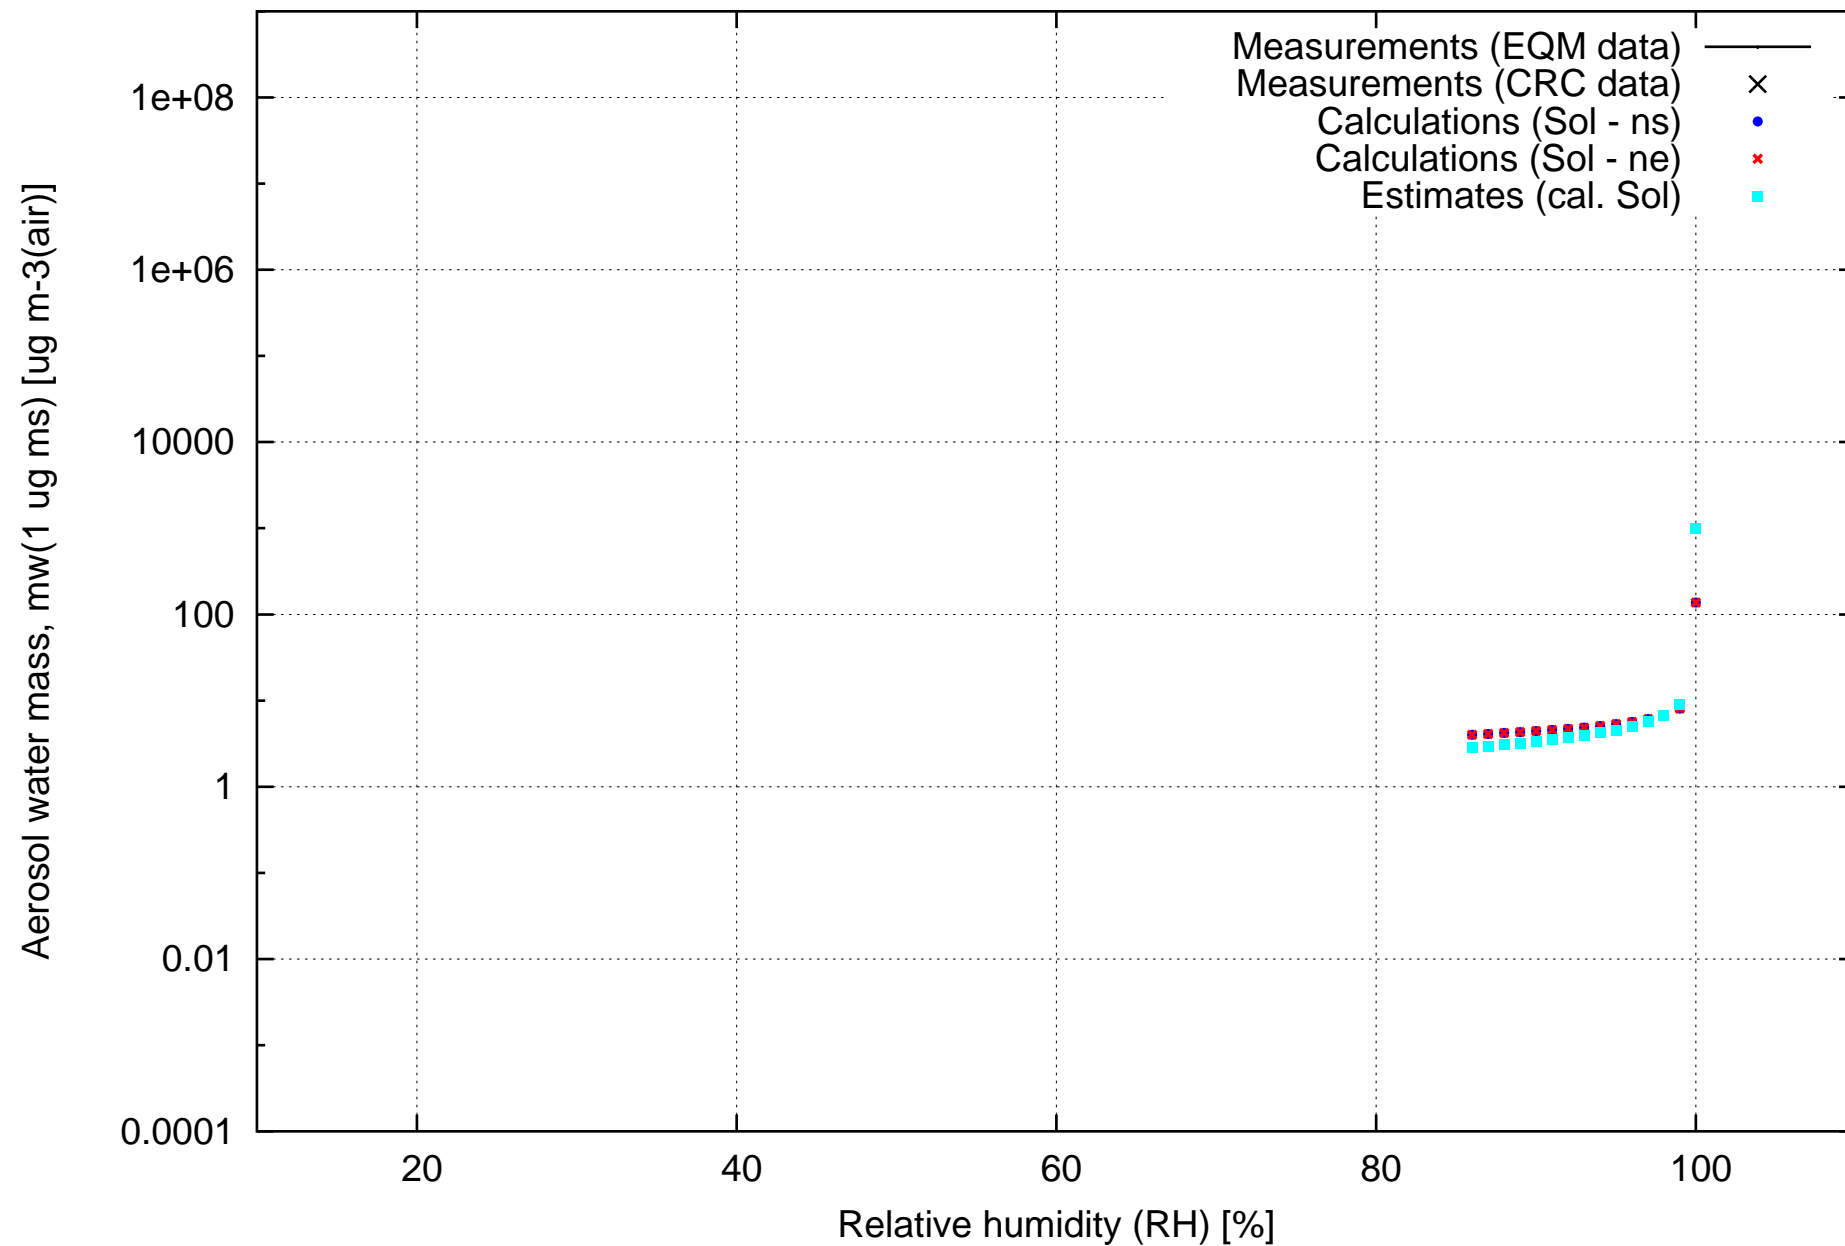

# Ammonium sulfate - (NH<sub>4</sub>)<sub>2</sub>SO<sub>4</sub>

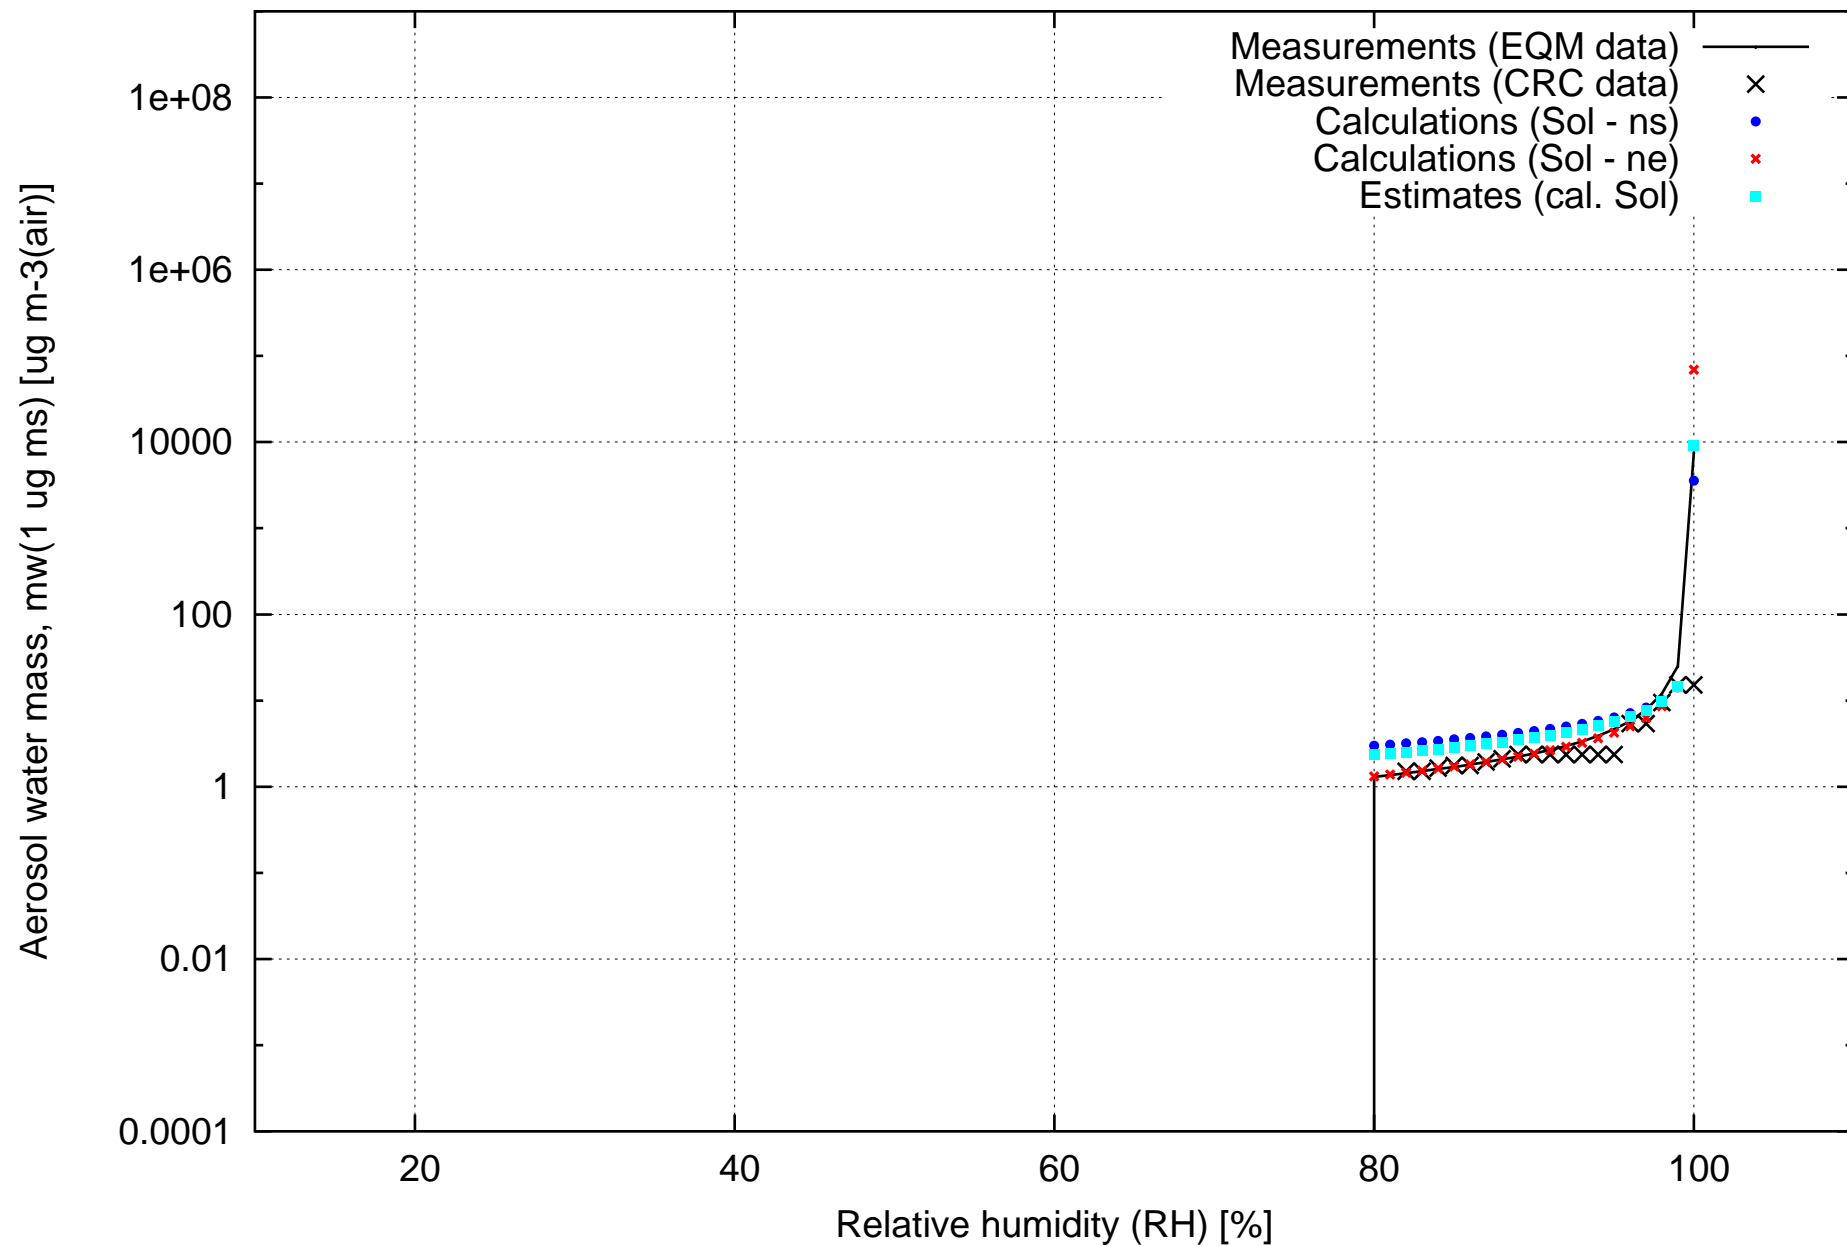



# Ammonium hydrogen sulfate - $\text{NH}_4\text{HSO}_4$

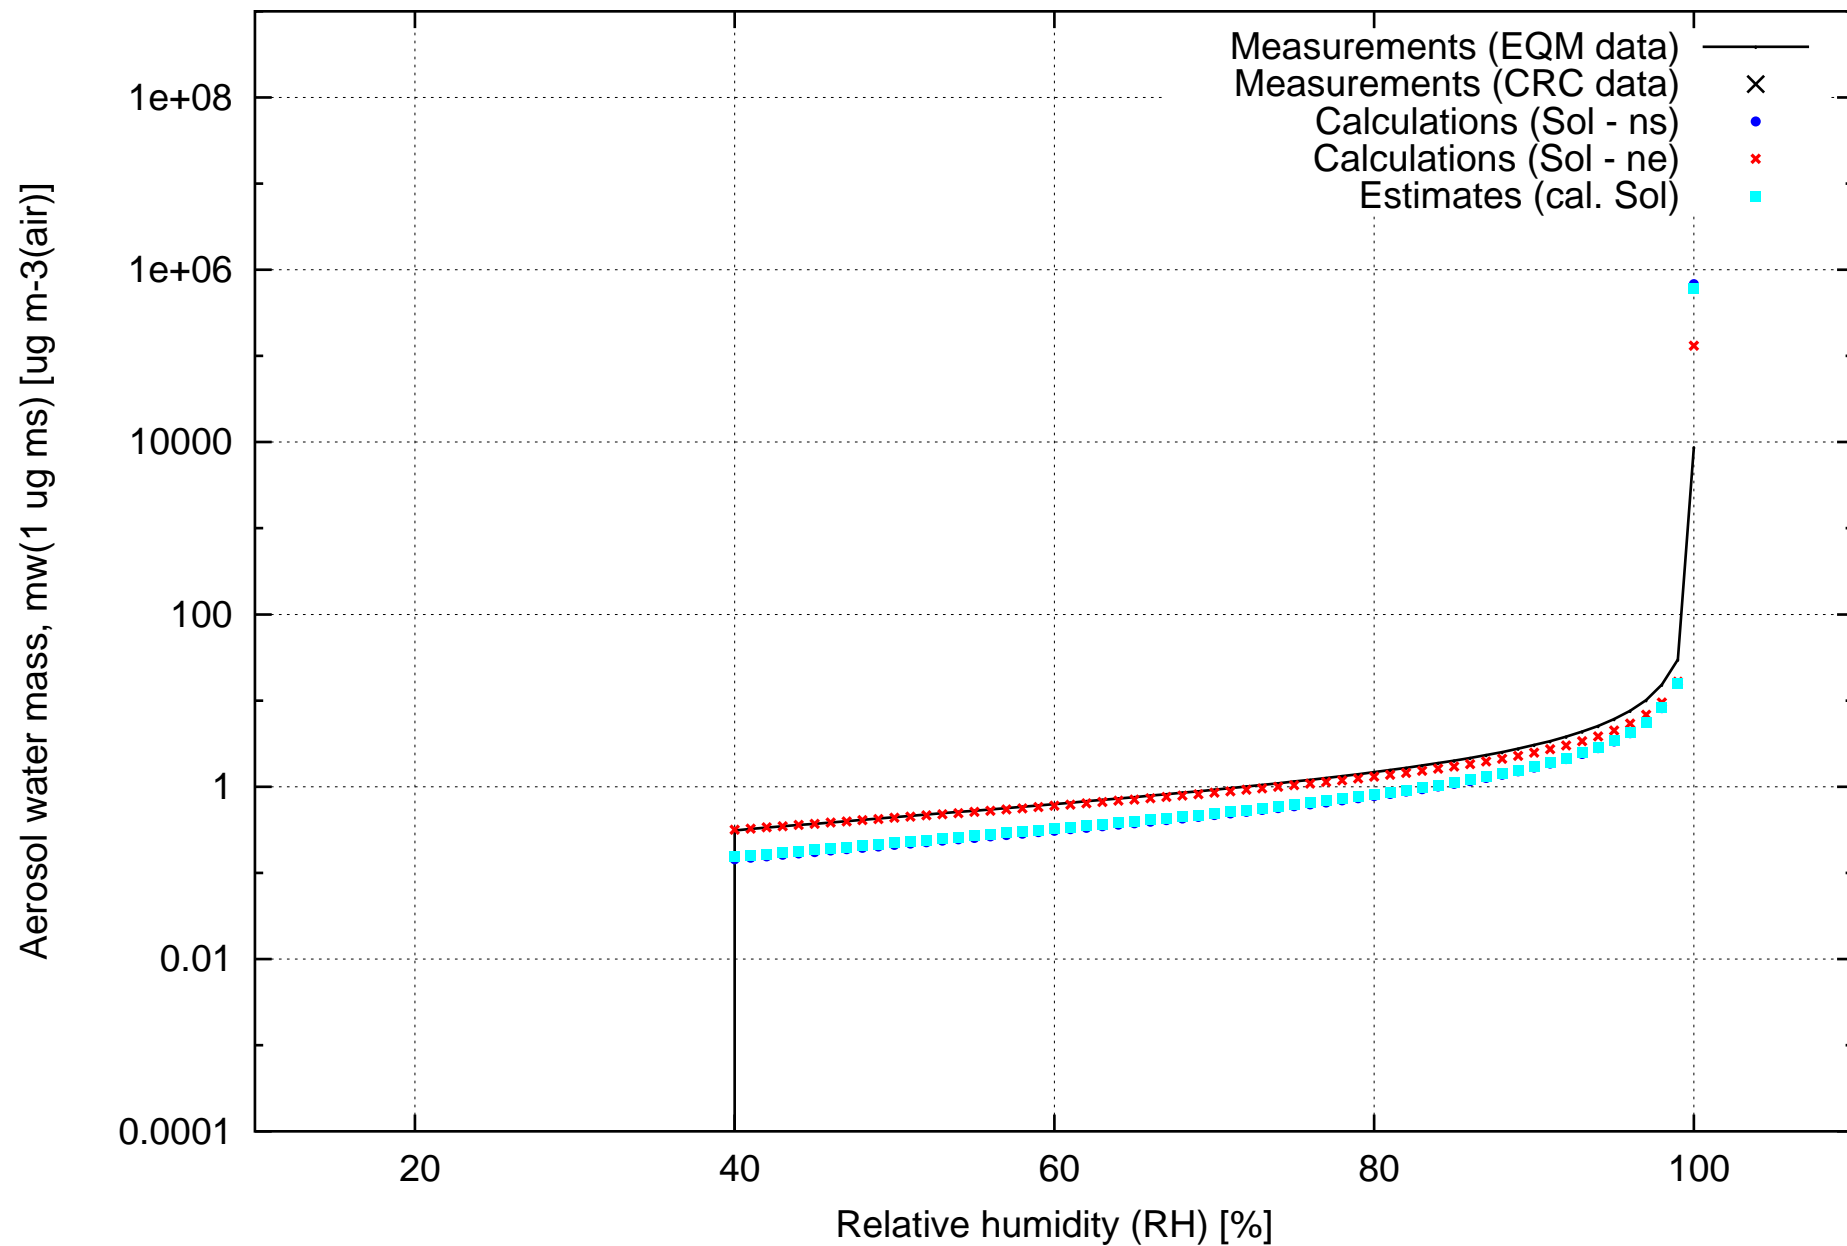

# Ammonium nitrate - $\text{NH}_4\text{NO}_3$

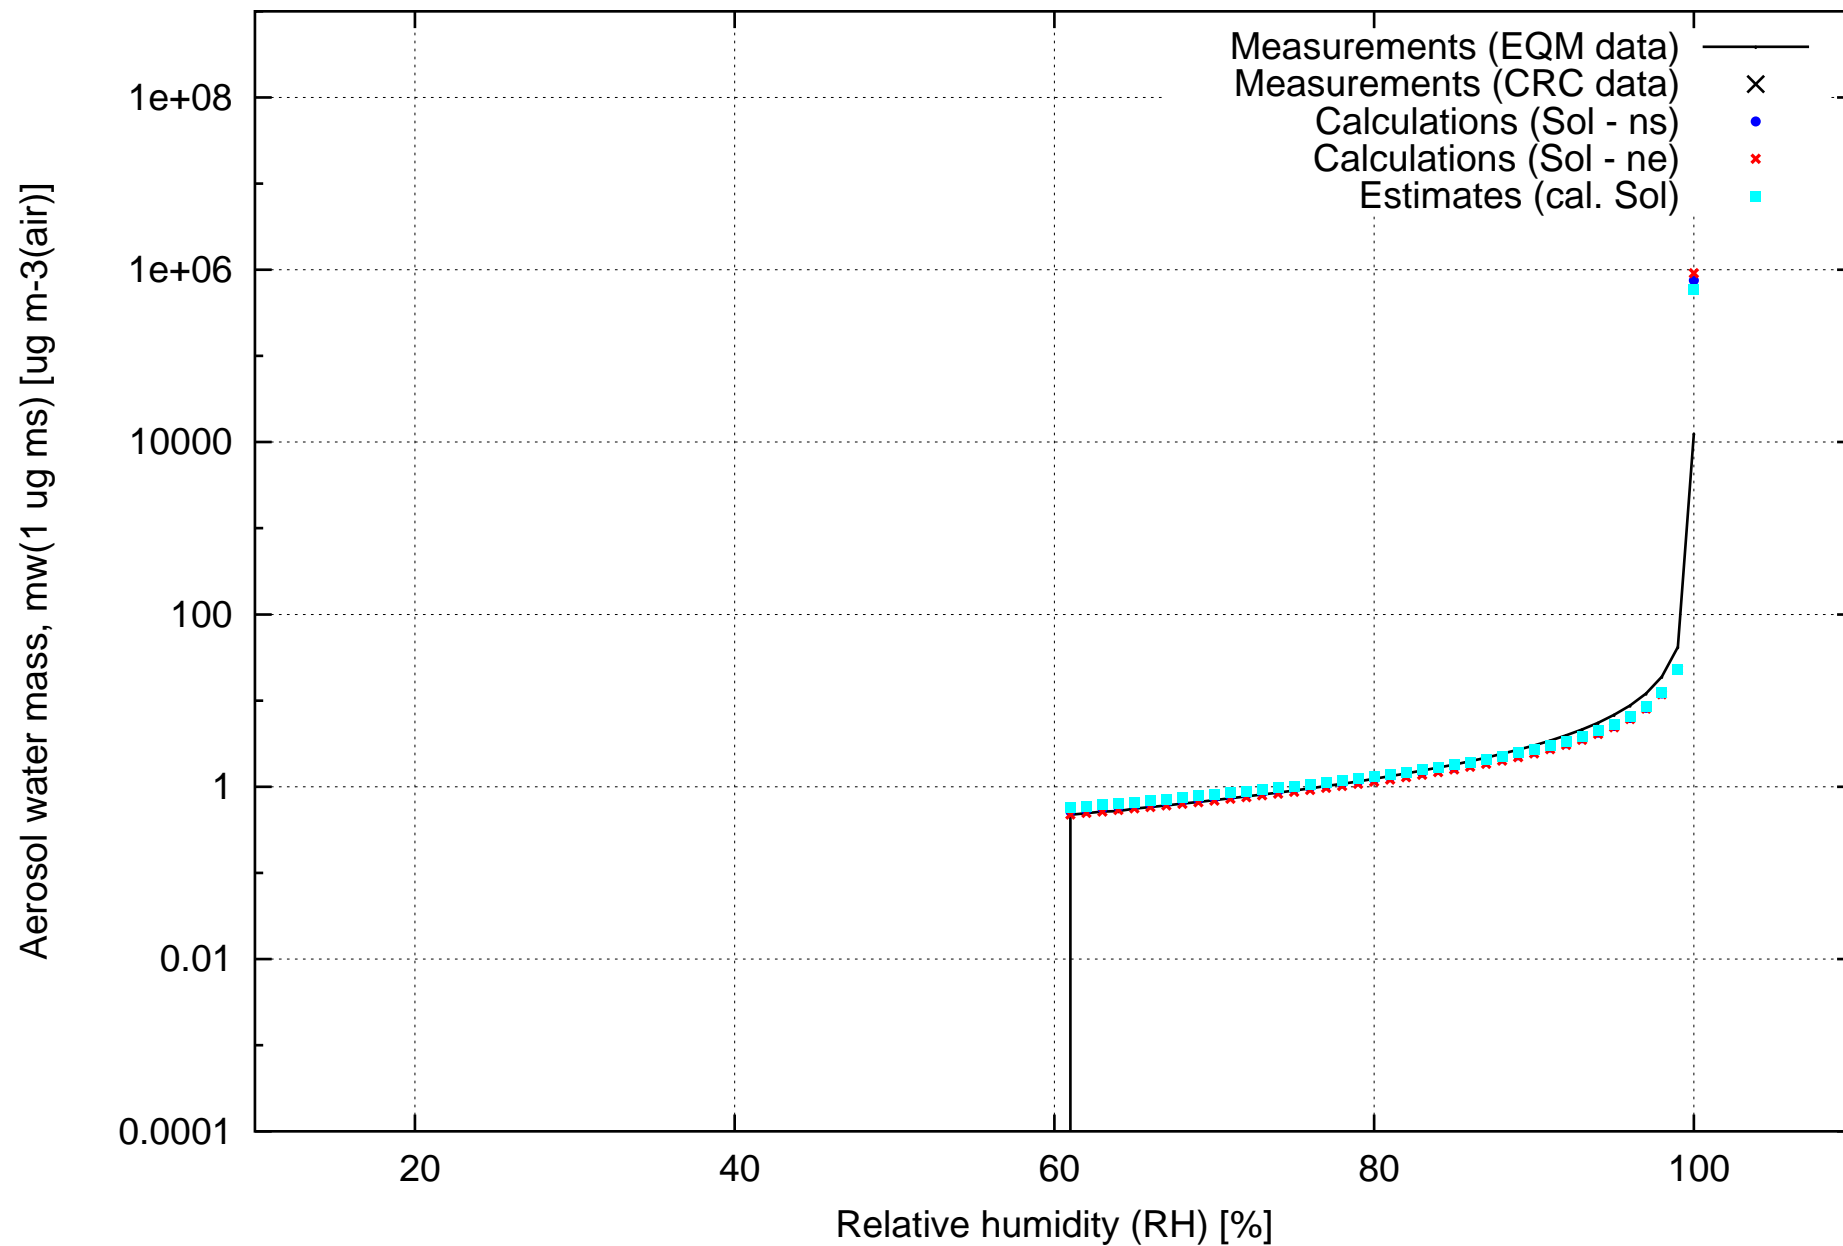

# Ammonium chloride - NH<sub>4</sub>Cl

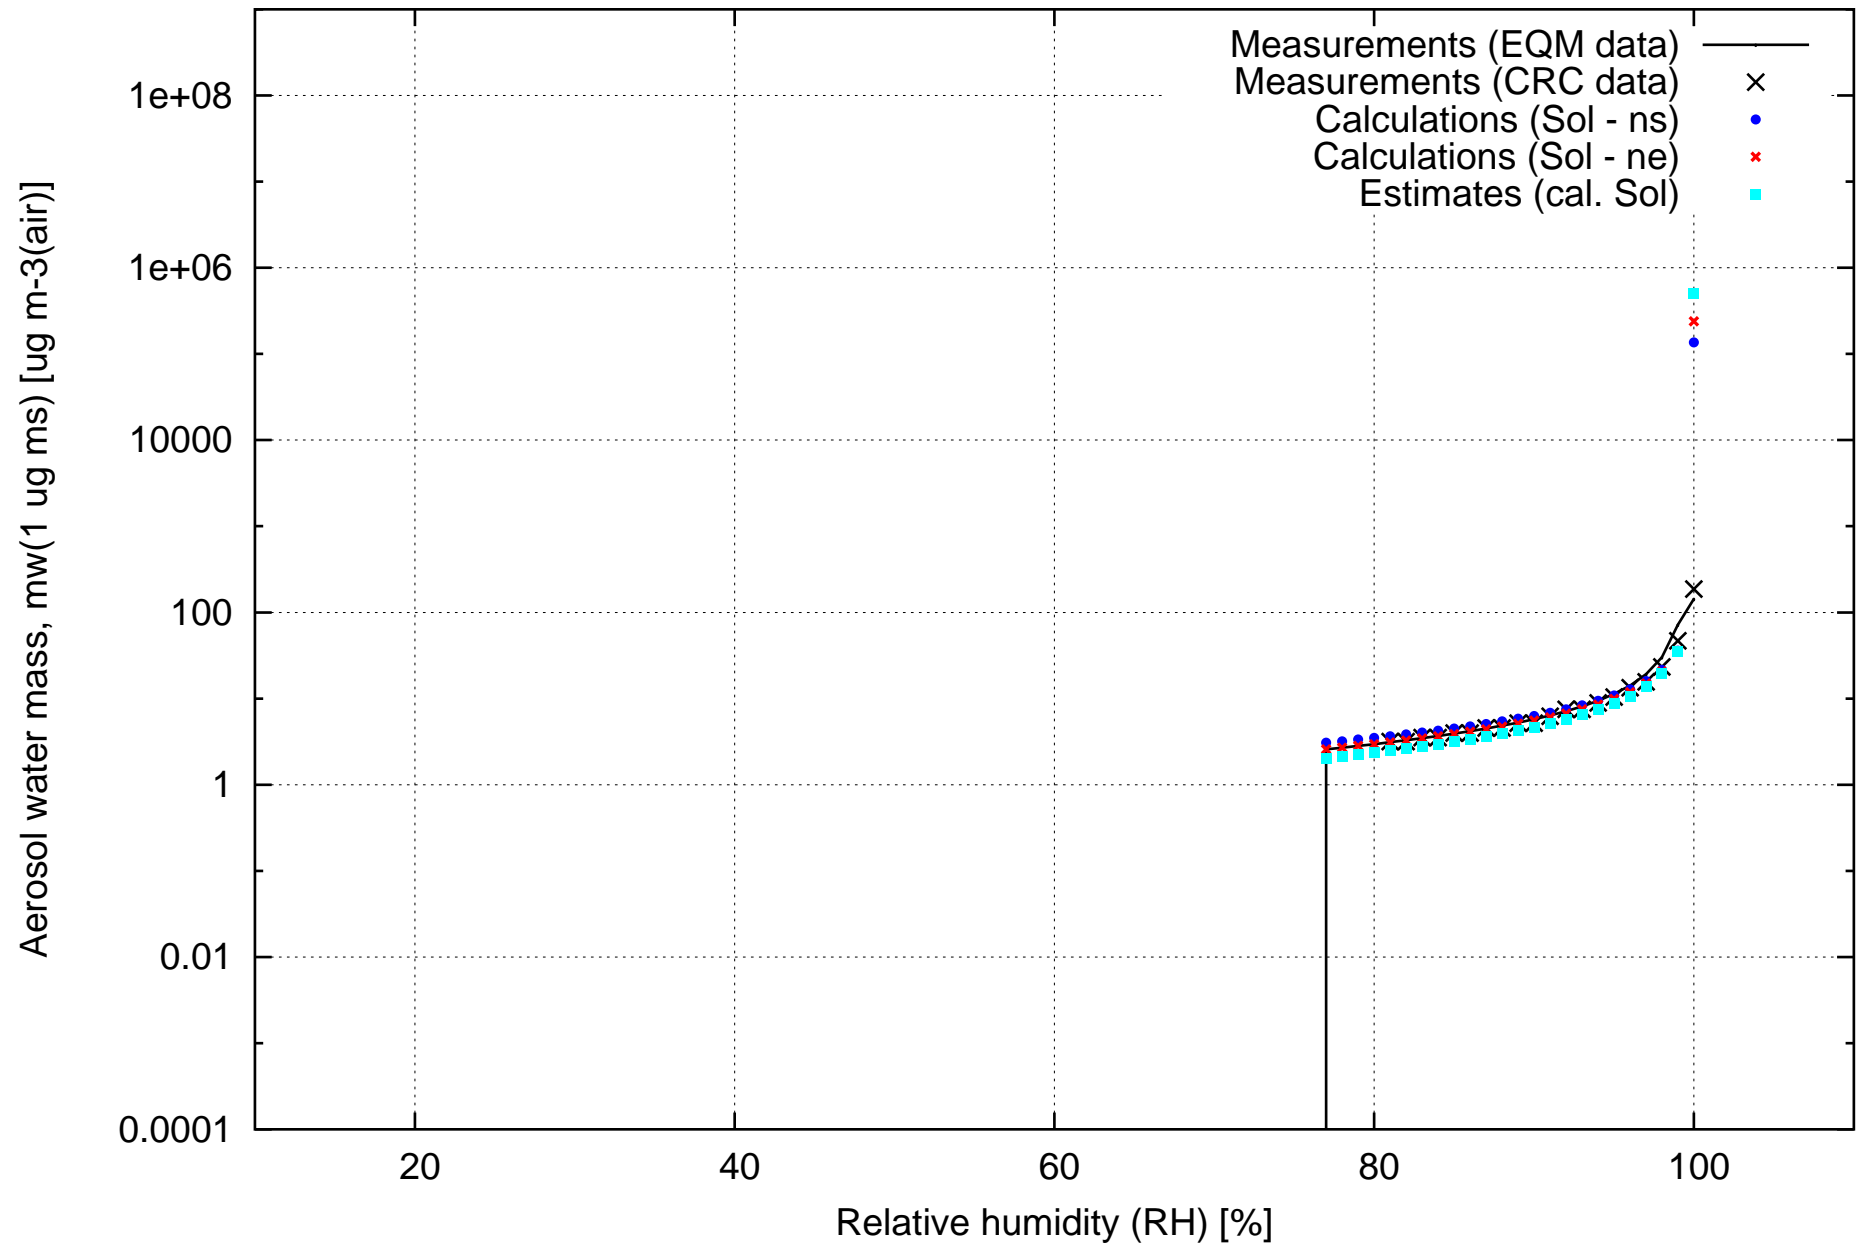

# Ammonium bromide - NH<sub>4</sub>Br

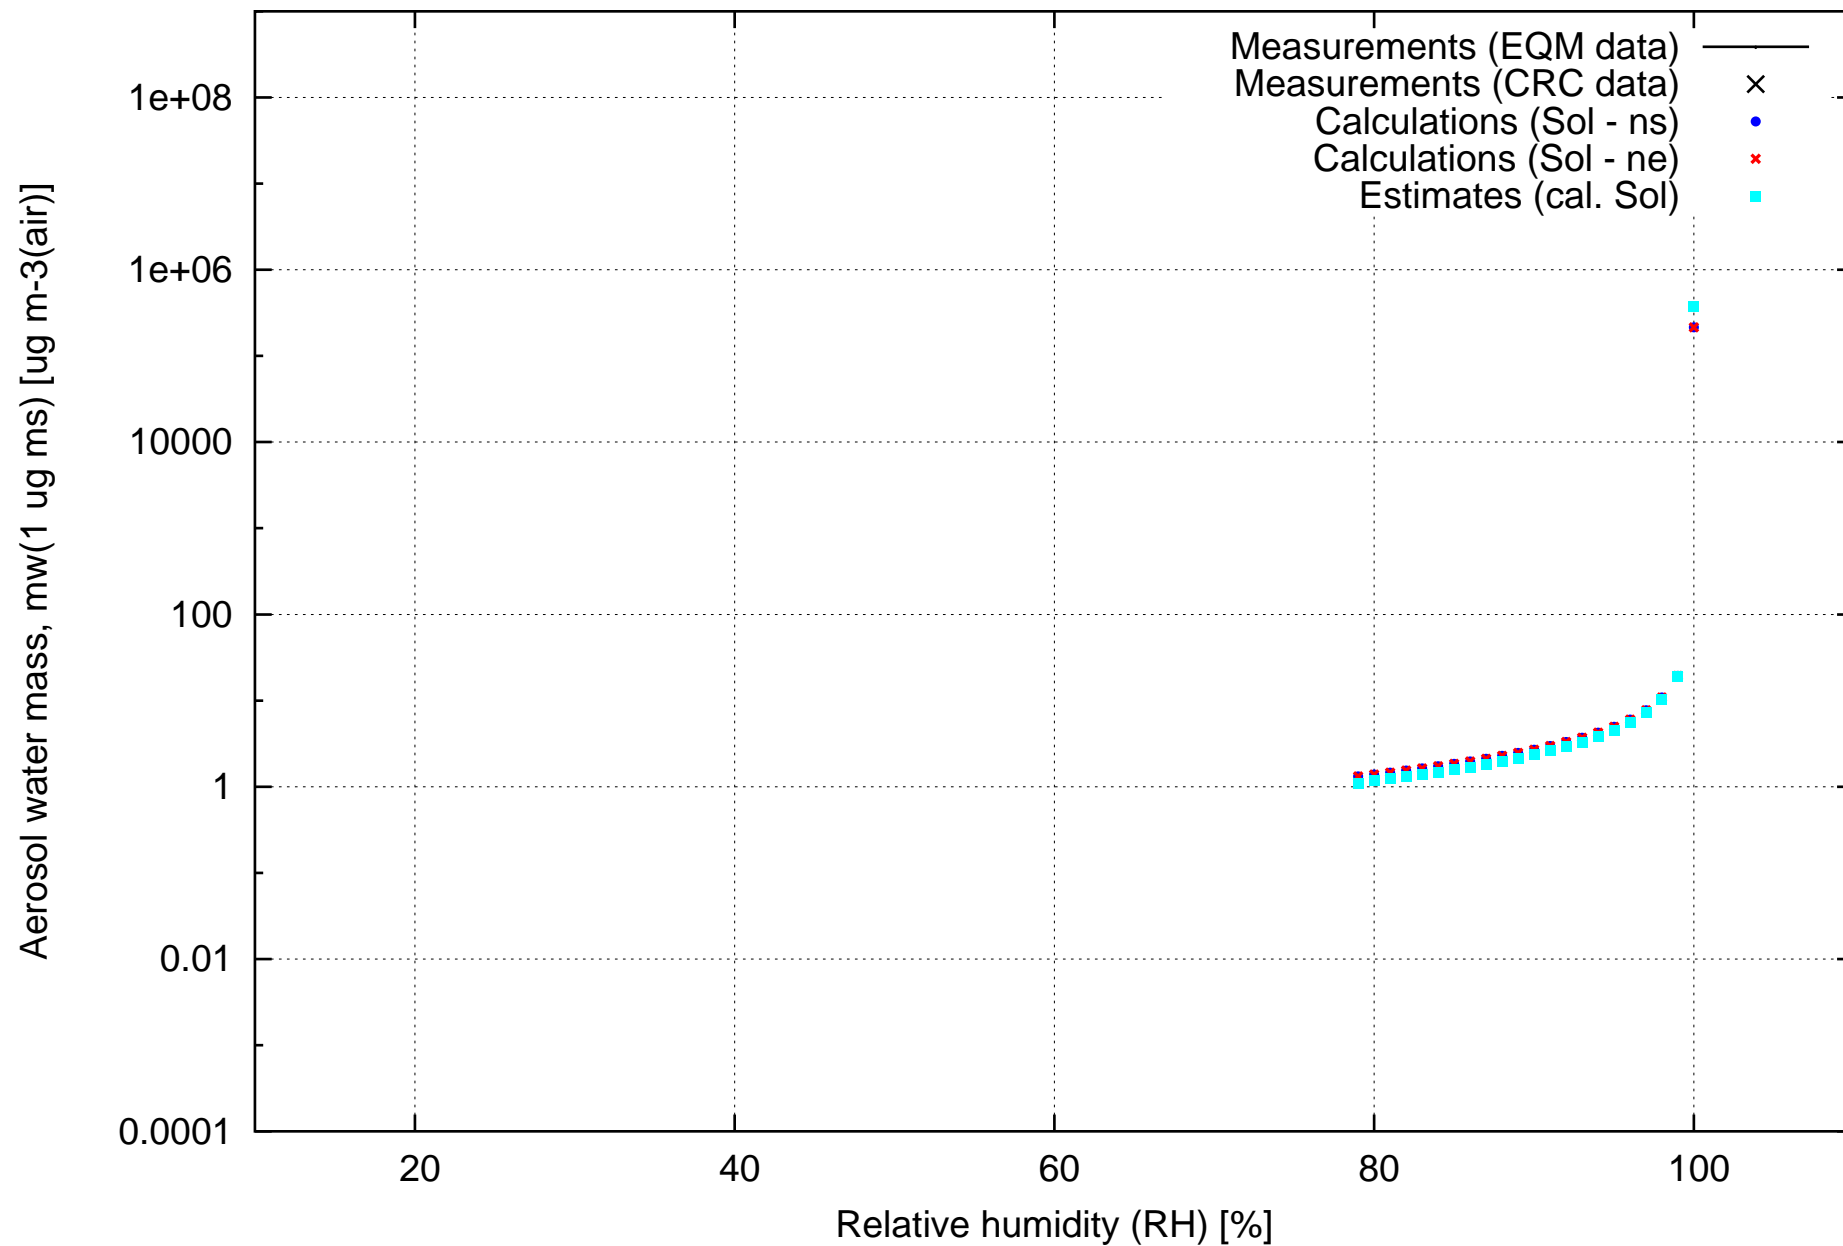

# Ammonium iodide - NH<sub>4</sub>I

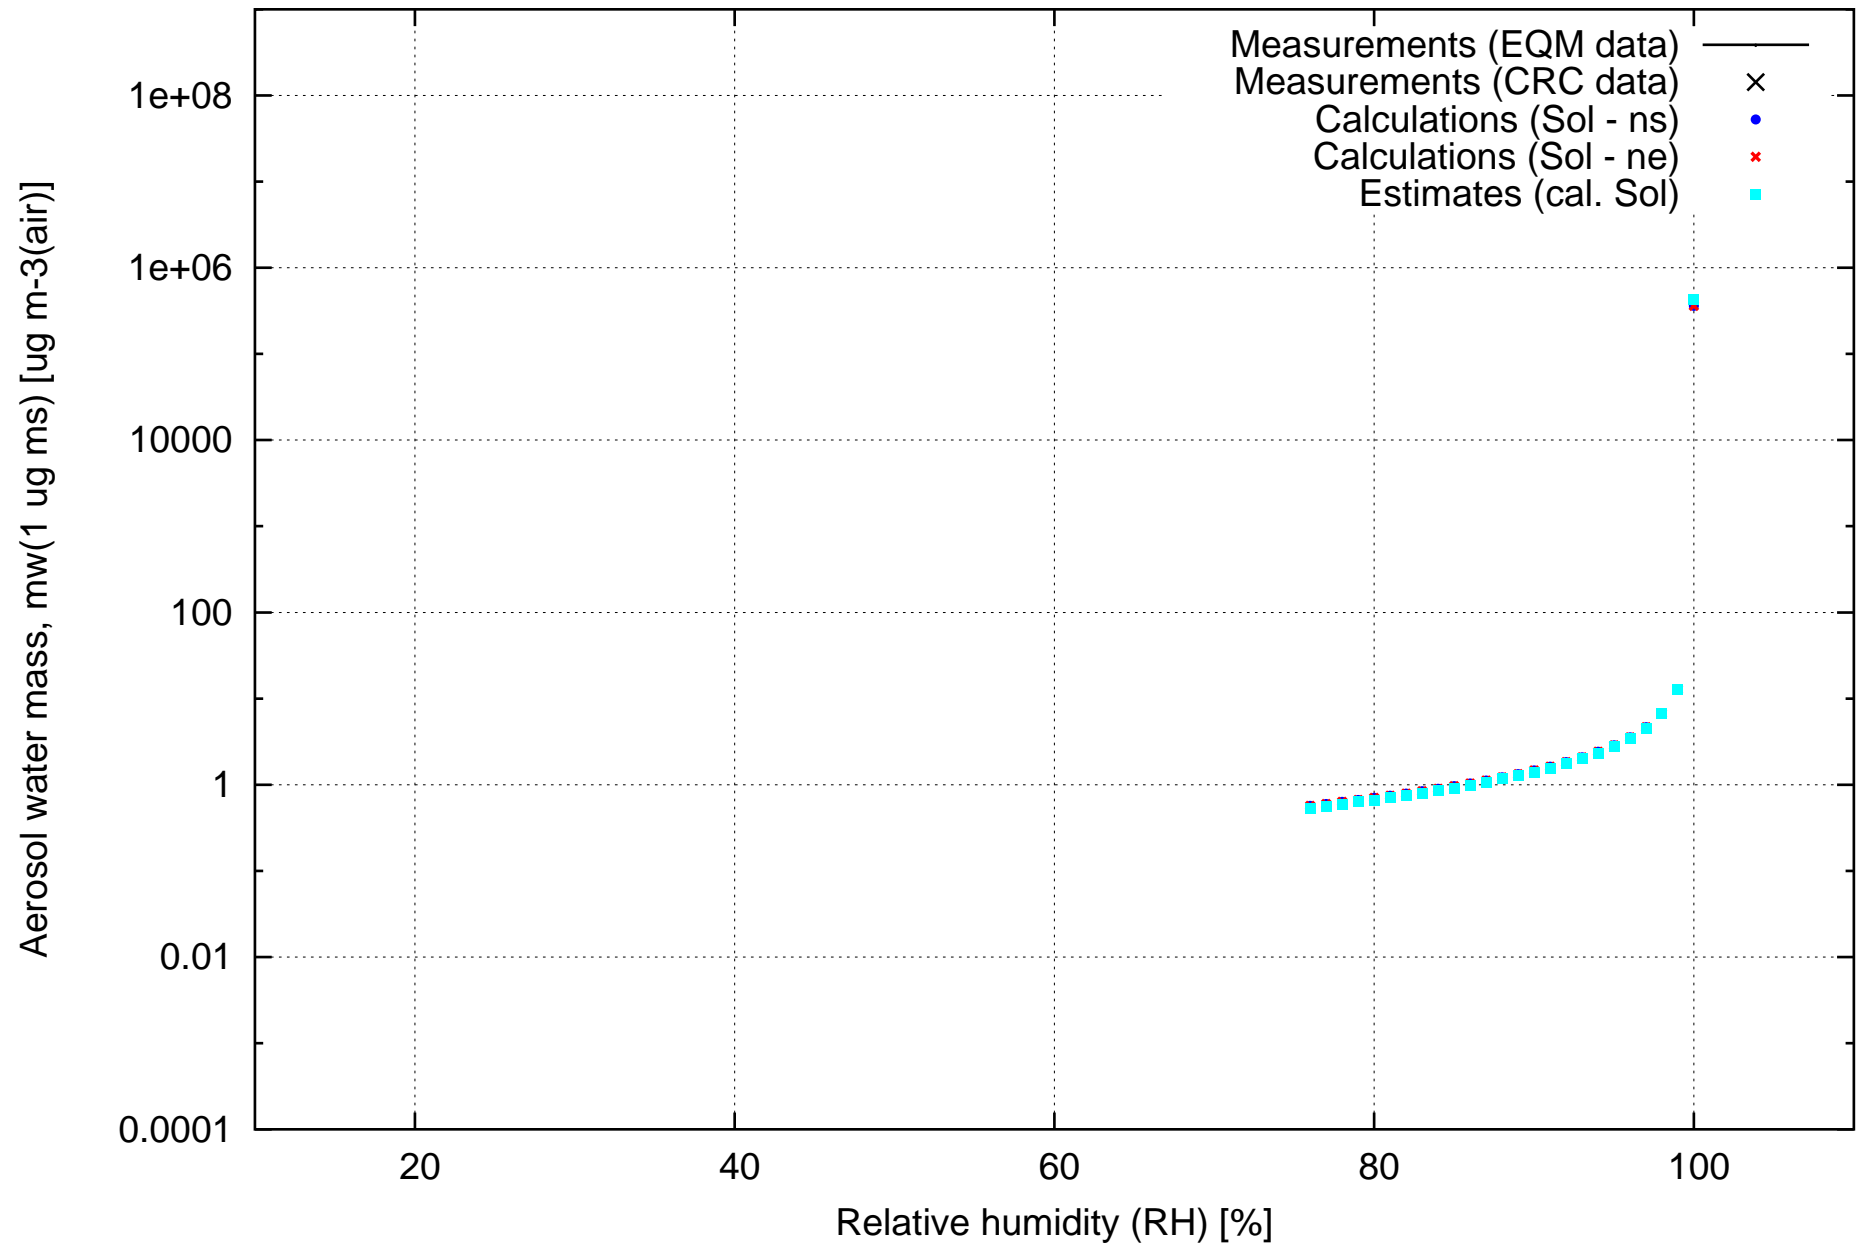

# Ammonium carbonate - (NH<sub>4</sub>)<sub>2</sub>CO<sub>3</sub>

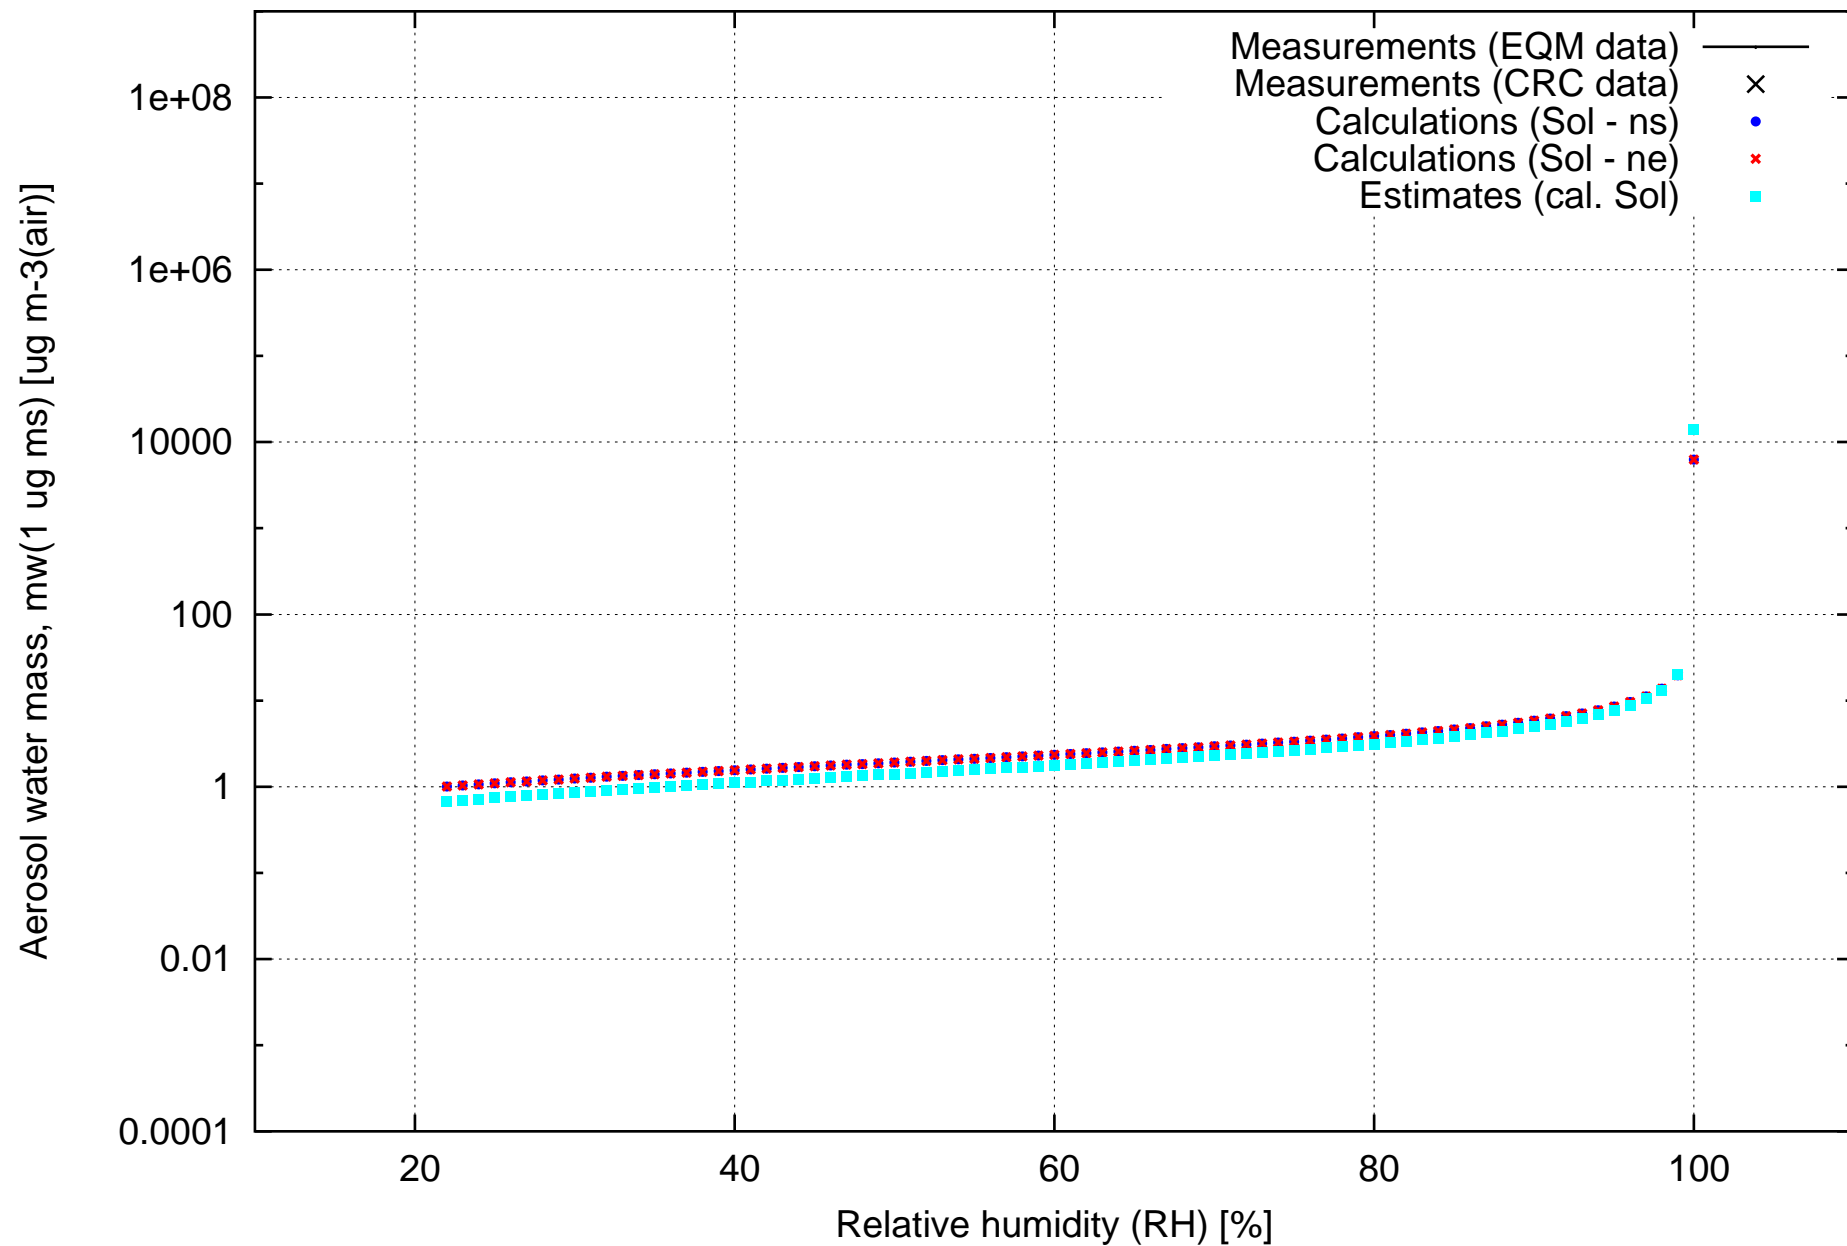

# Ammonium hydrogen carbonate- $\text{NH}_4\text{HCO}_3$

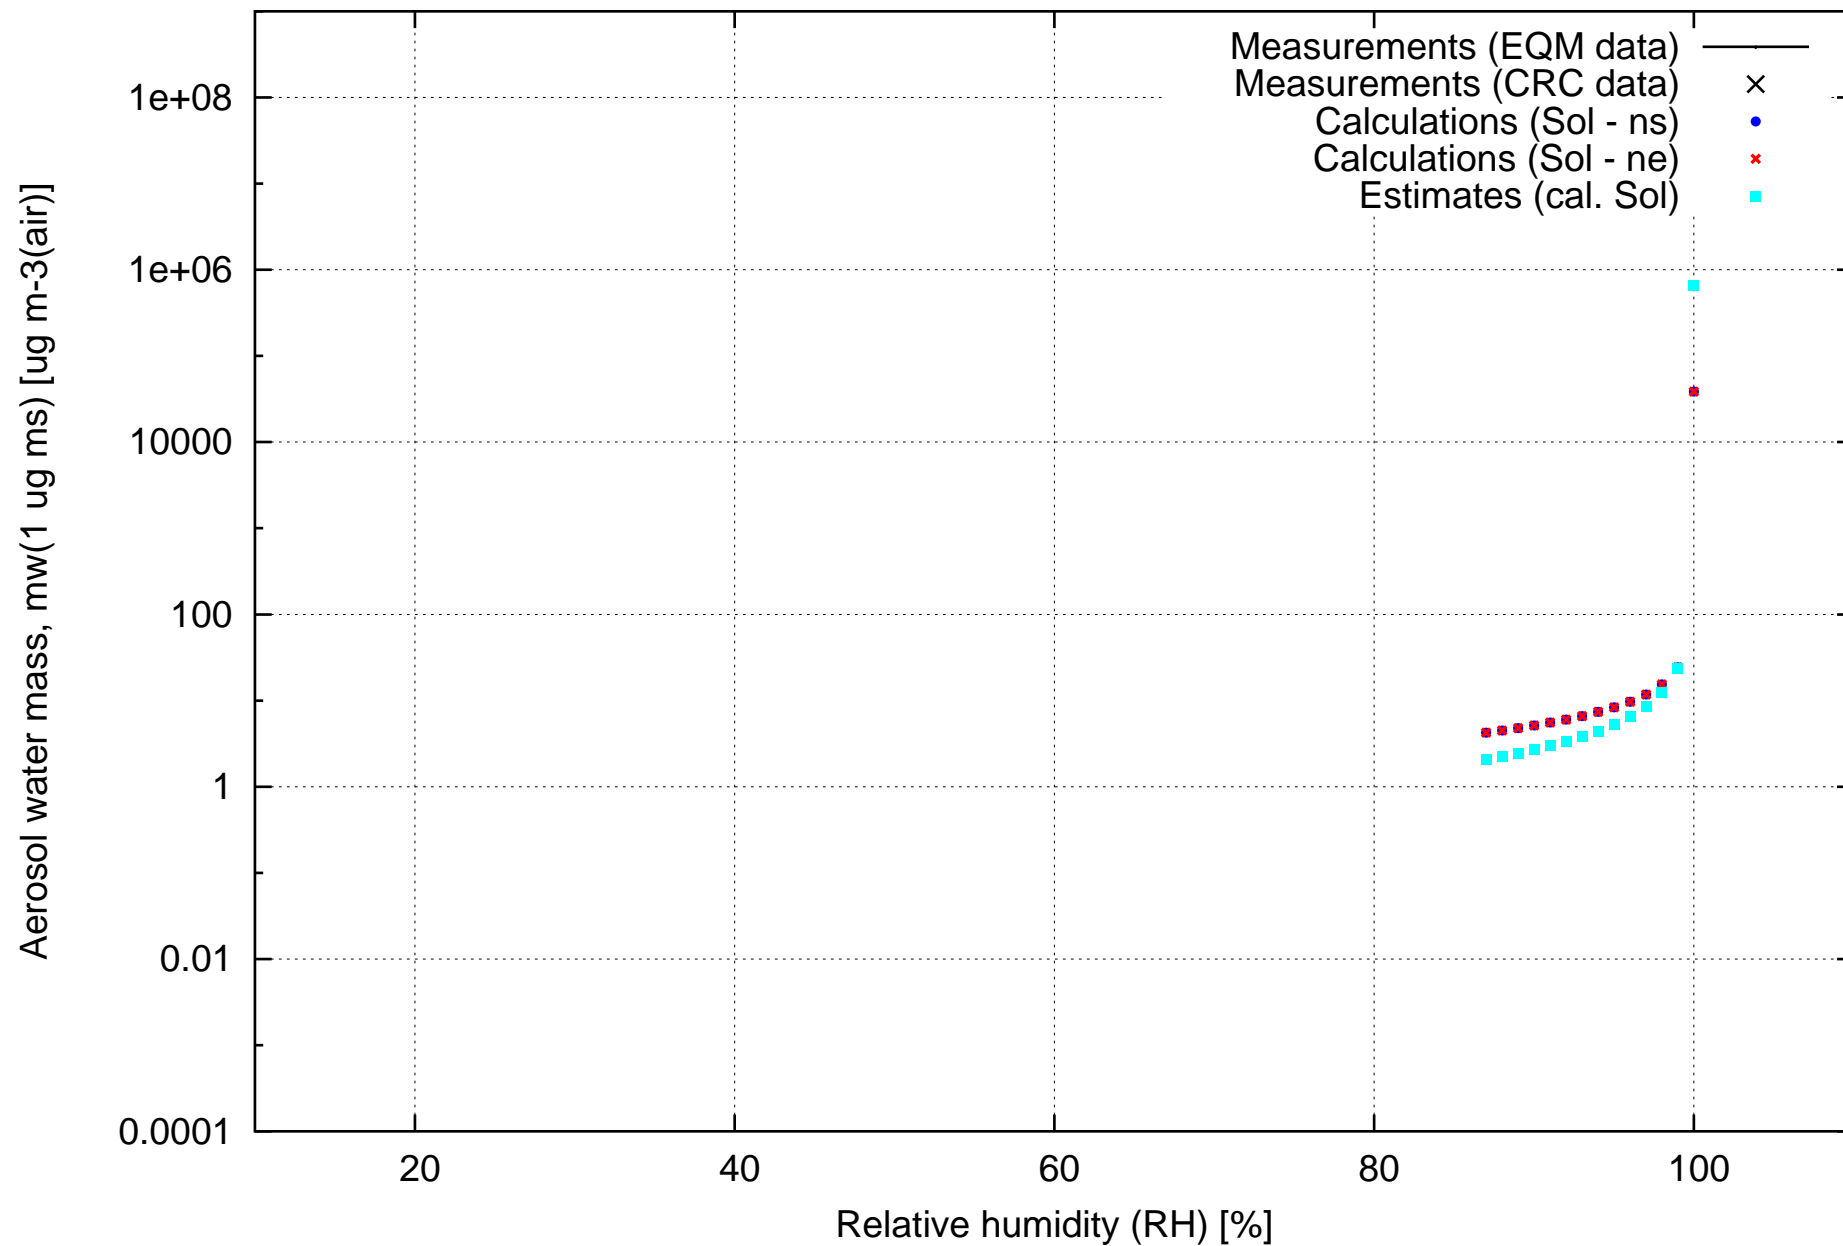

# Ammonium hydroxide - NH<sub>4</sub>OH

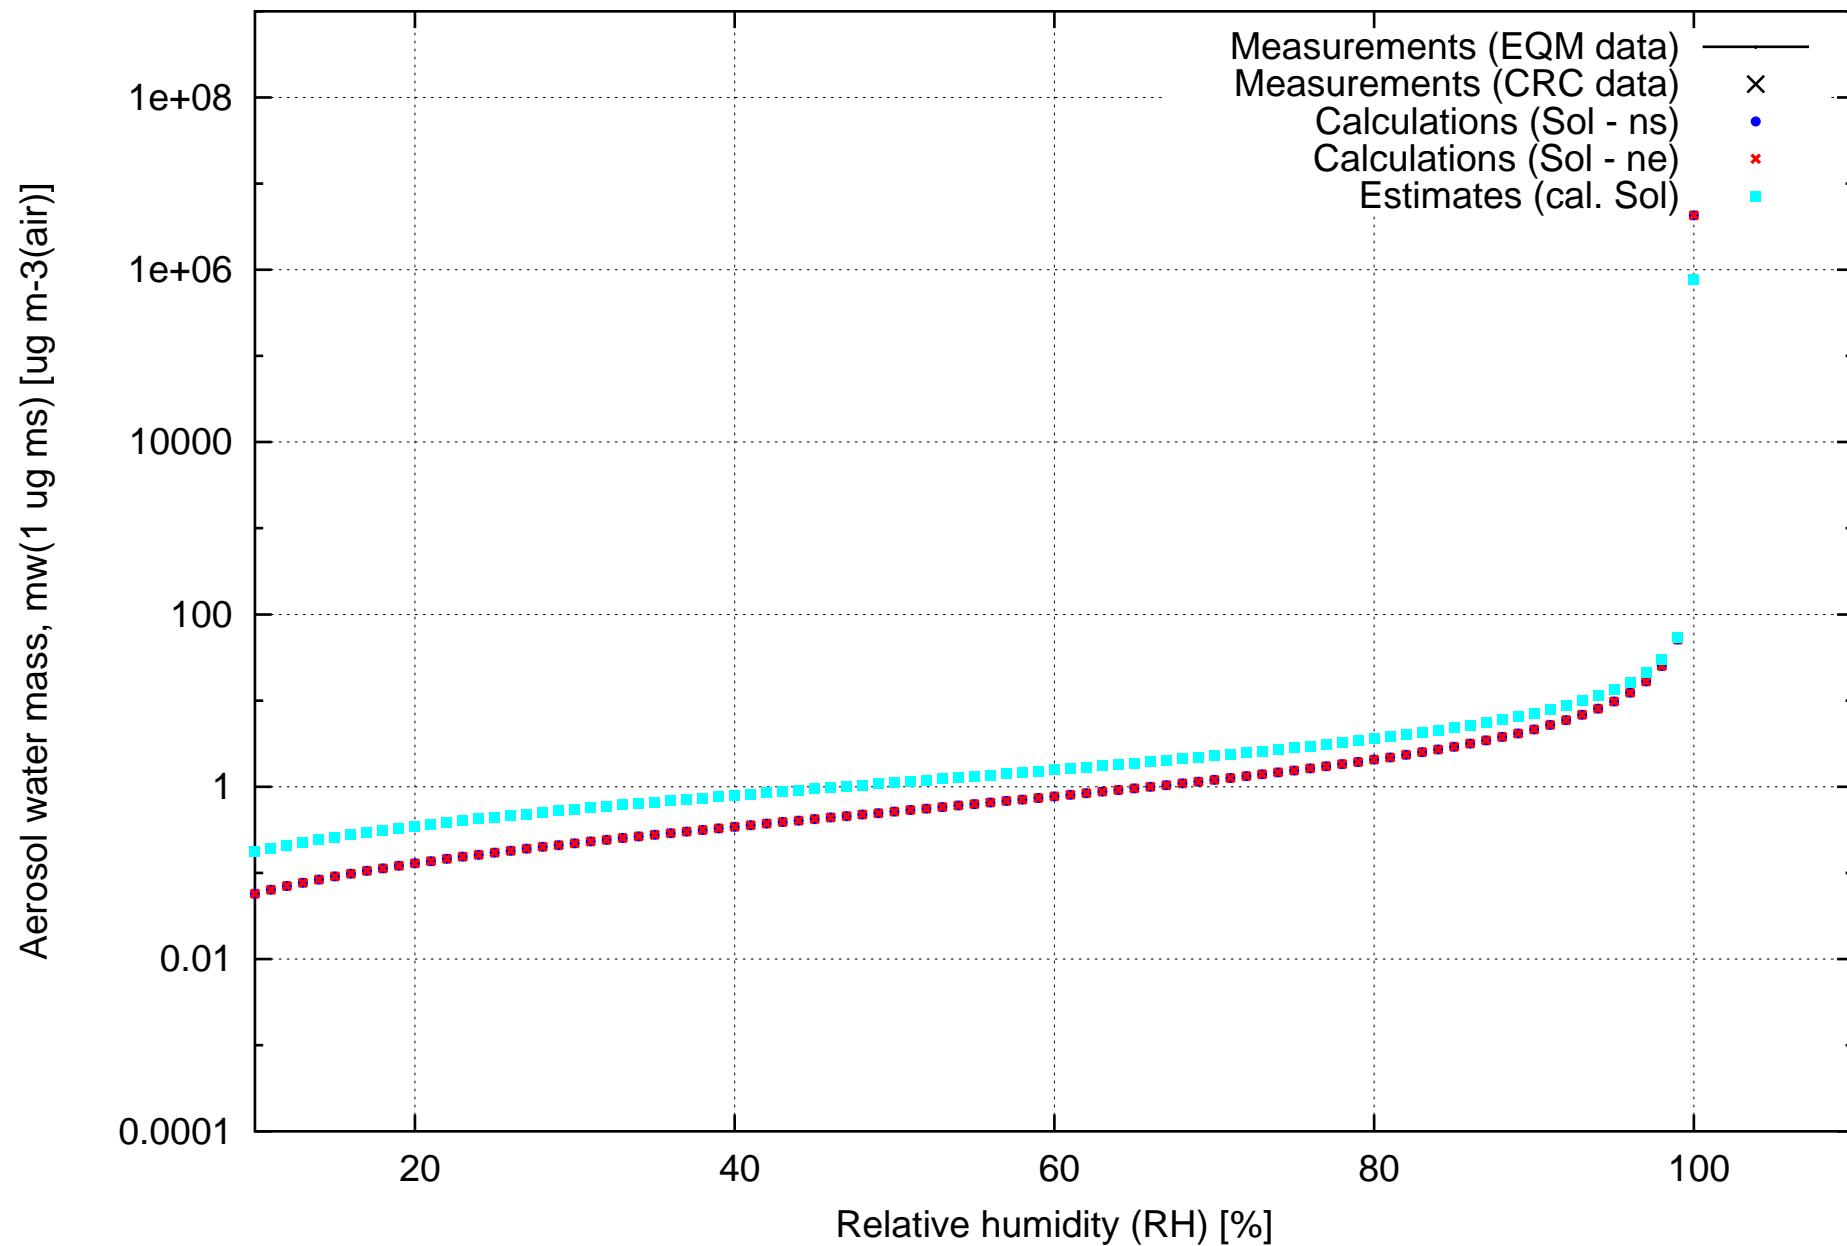



Ammonium formate -  $\text{NH}_4\text{CHO}_2 = \text{H}(\text{COONH}_4)$

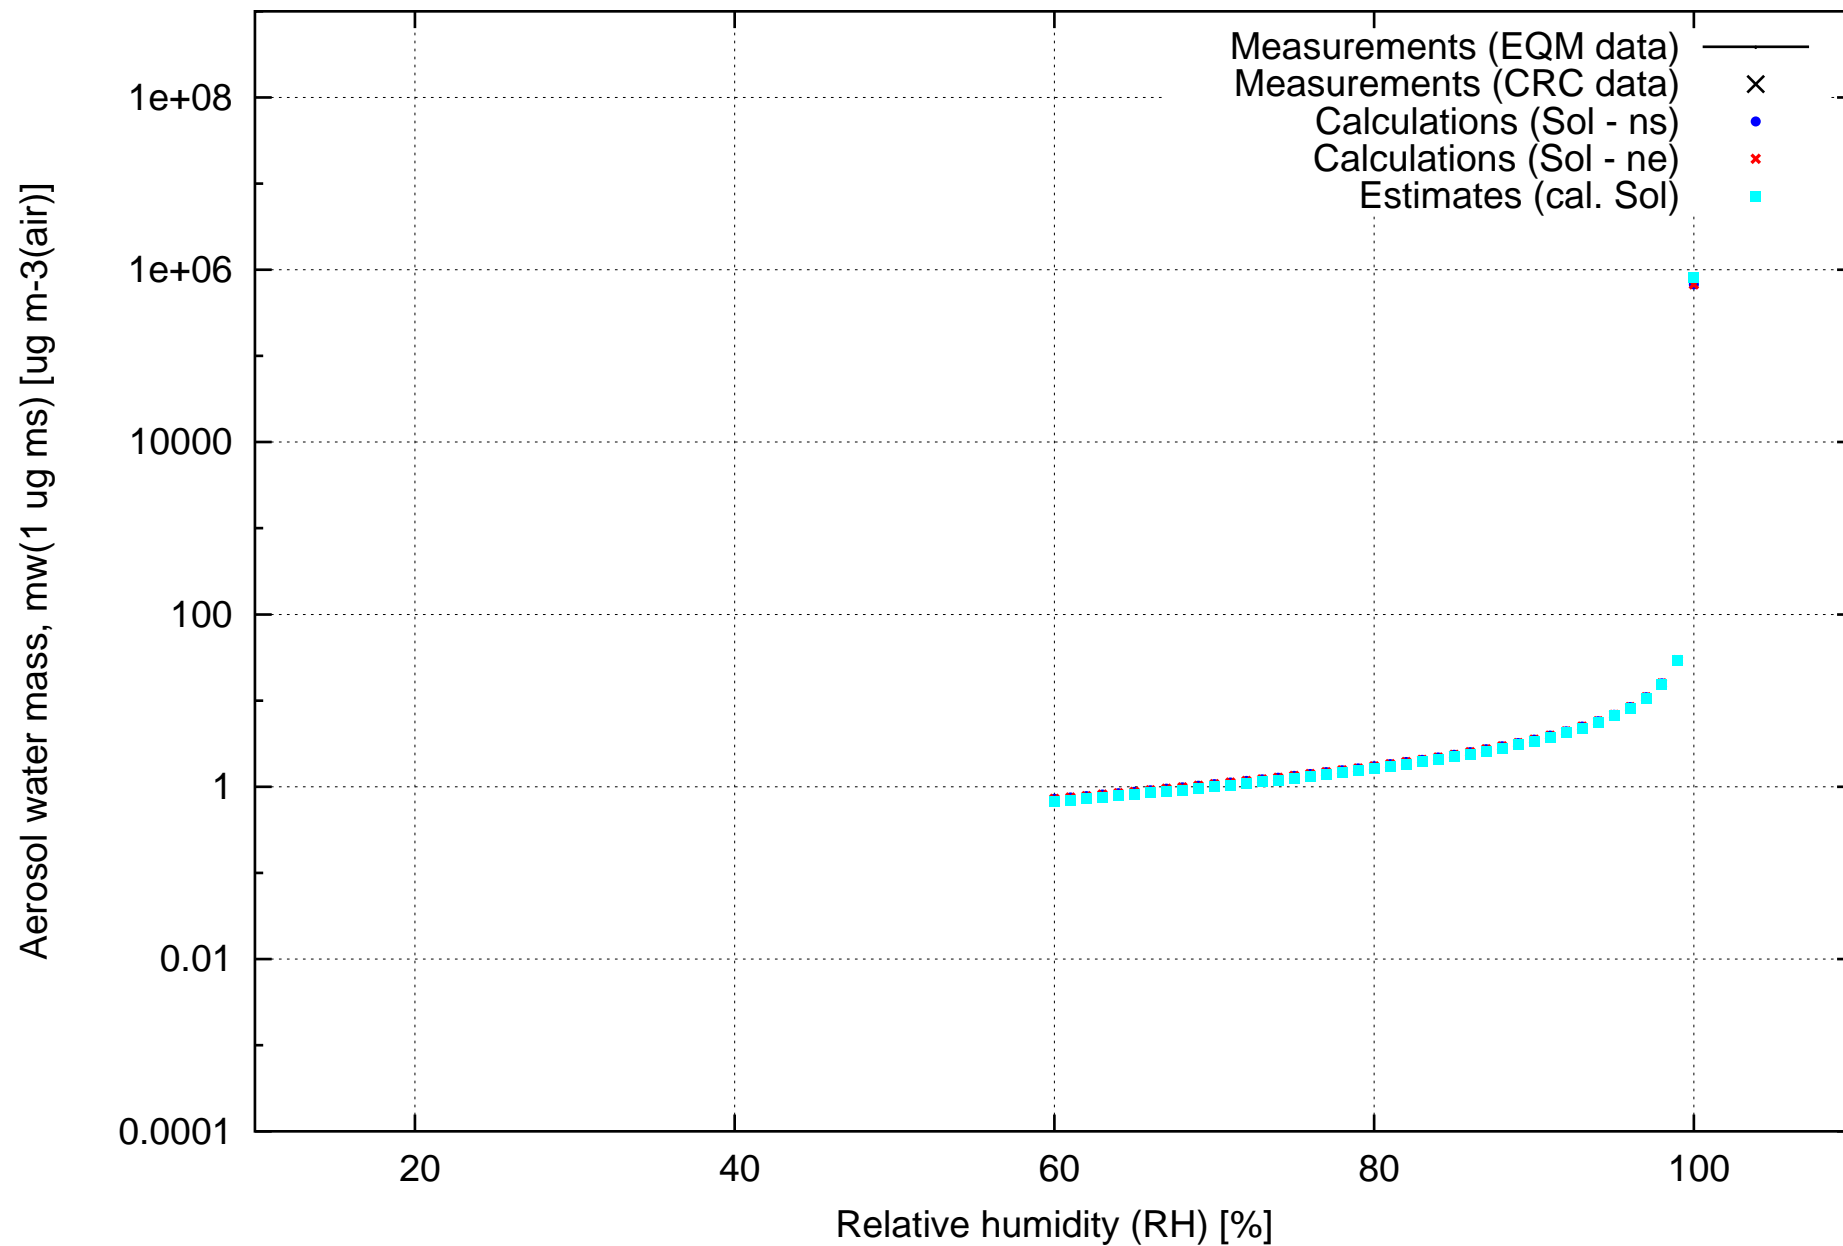

Ammonium acetate -  $\text{NH}_4\text{C}_2\text{H}_3\text{O}_2 = \text{CH}_3(\text{COONH}_4)$

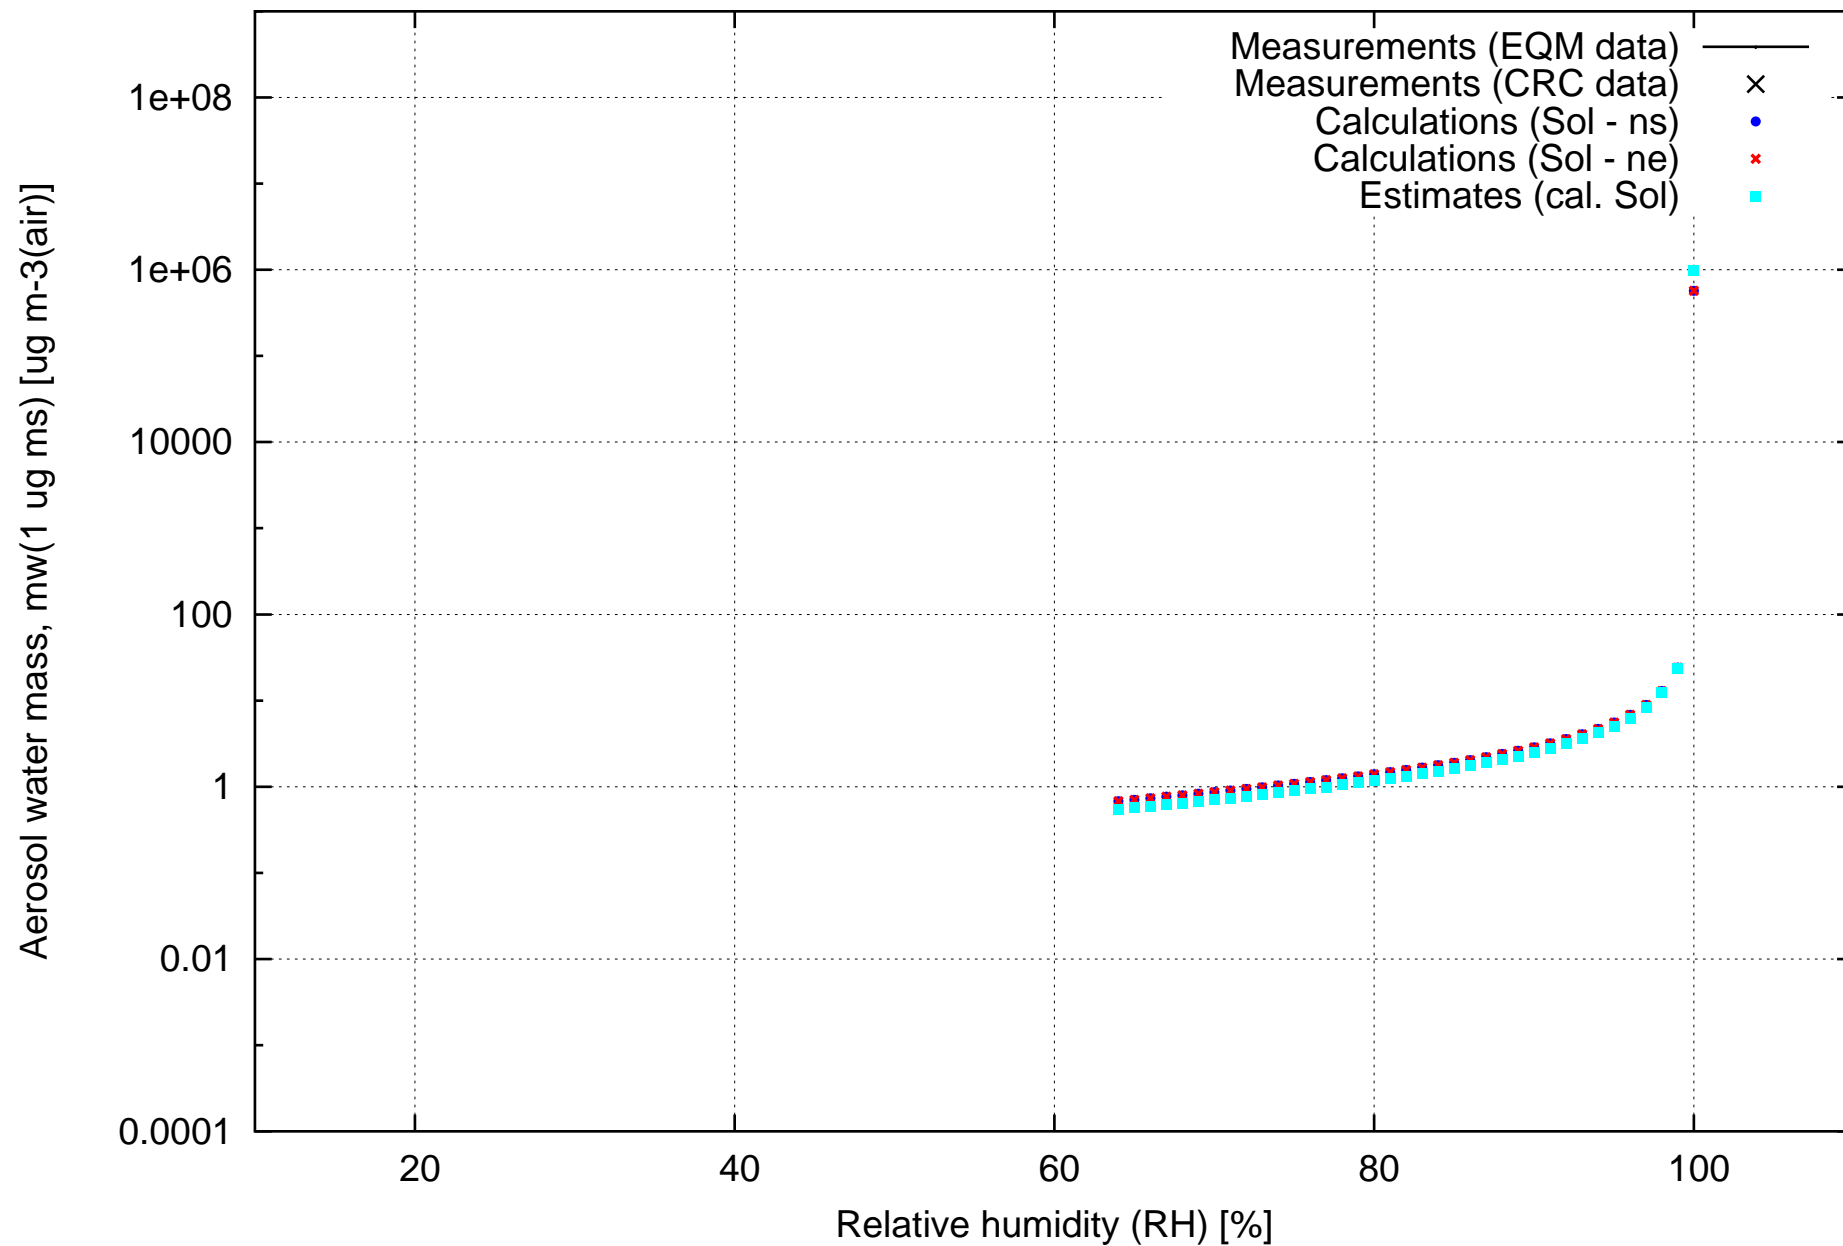

Ammonium oxalate -  $(\text{NH}_4)_2\text{C}_2\text{O}_4 = (\text{COONH}_4)_2$

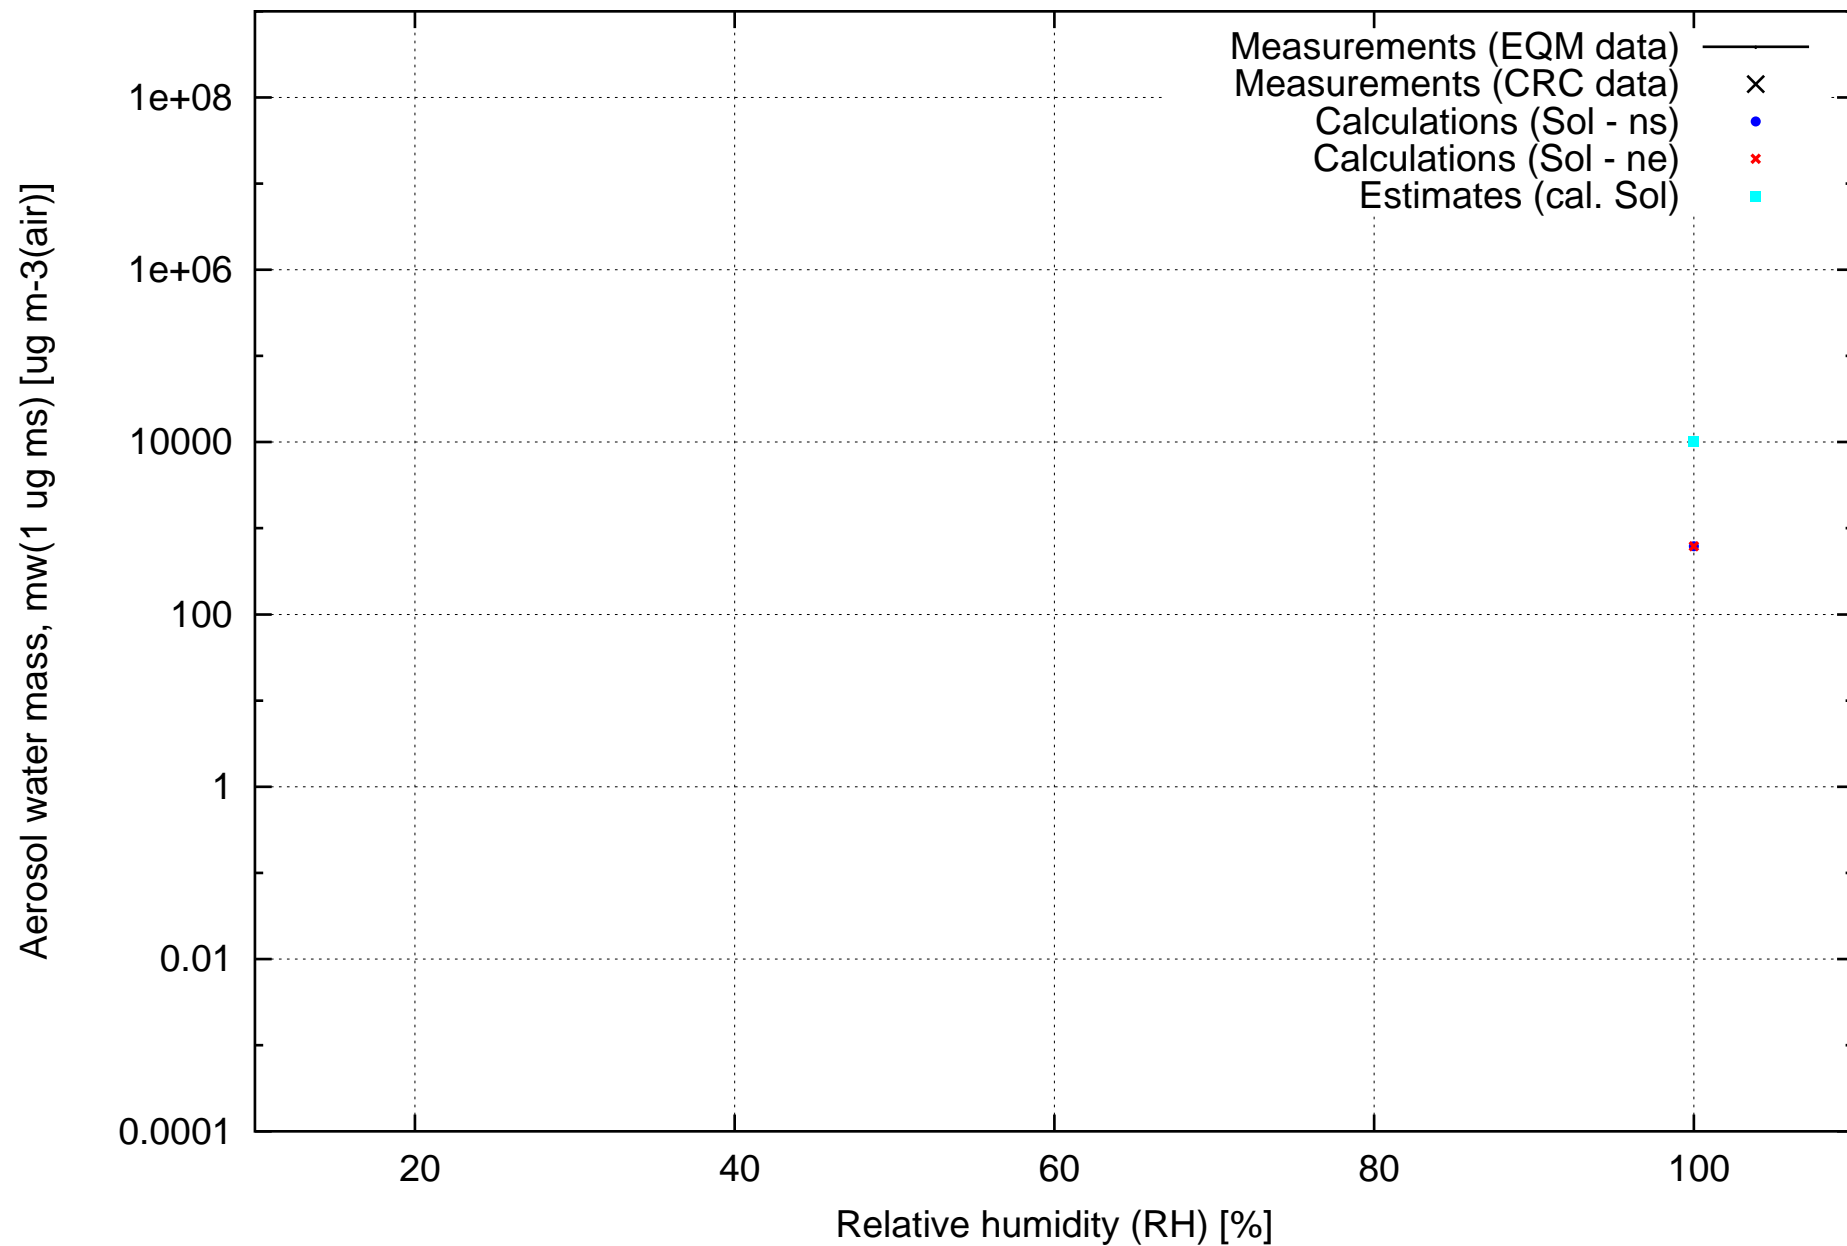

Ammonium citrate -  $(\text{NH}_4)_2\text{HC}_6\text{H}_5\text{O}_7 = (\text{HO})\text{C}(\text{COONH}_4)_3$

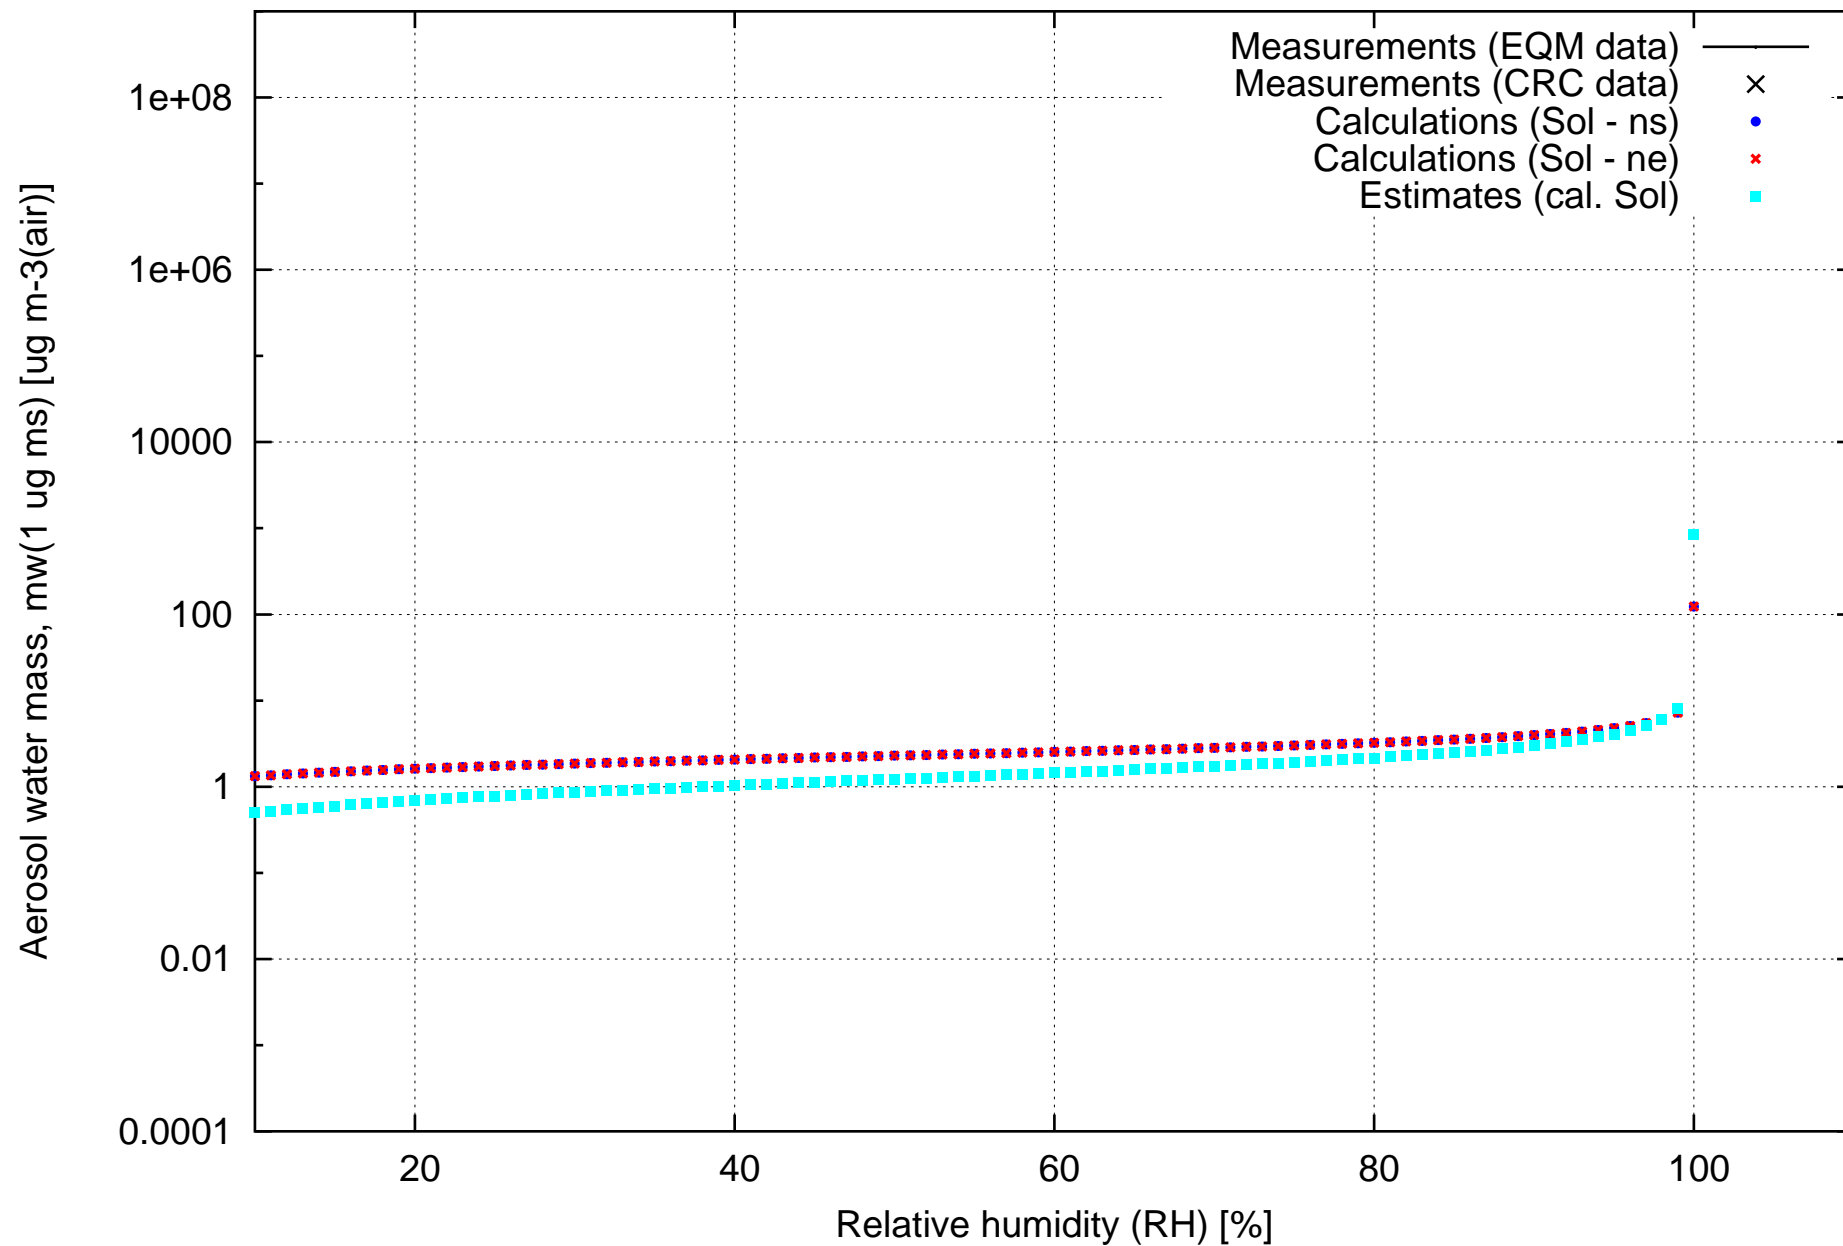

# Sodium phosphate - Na<sub>3</sub>PO<sub>4</sub>

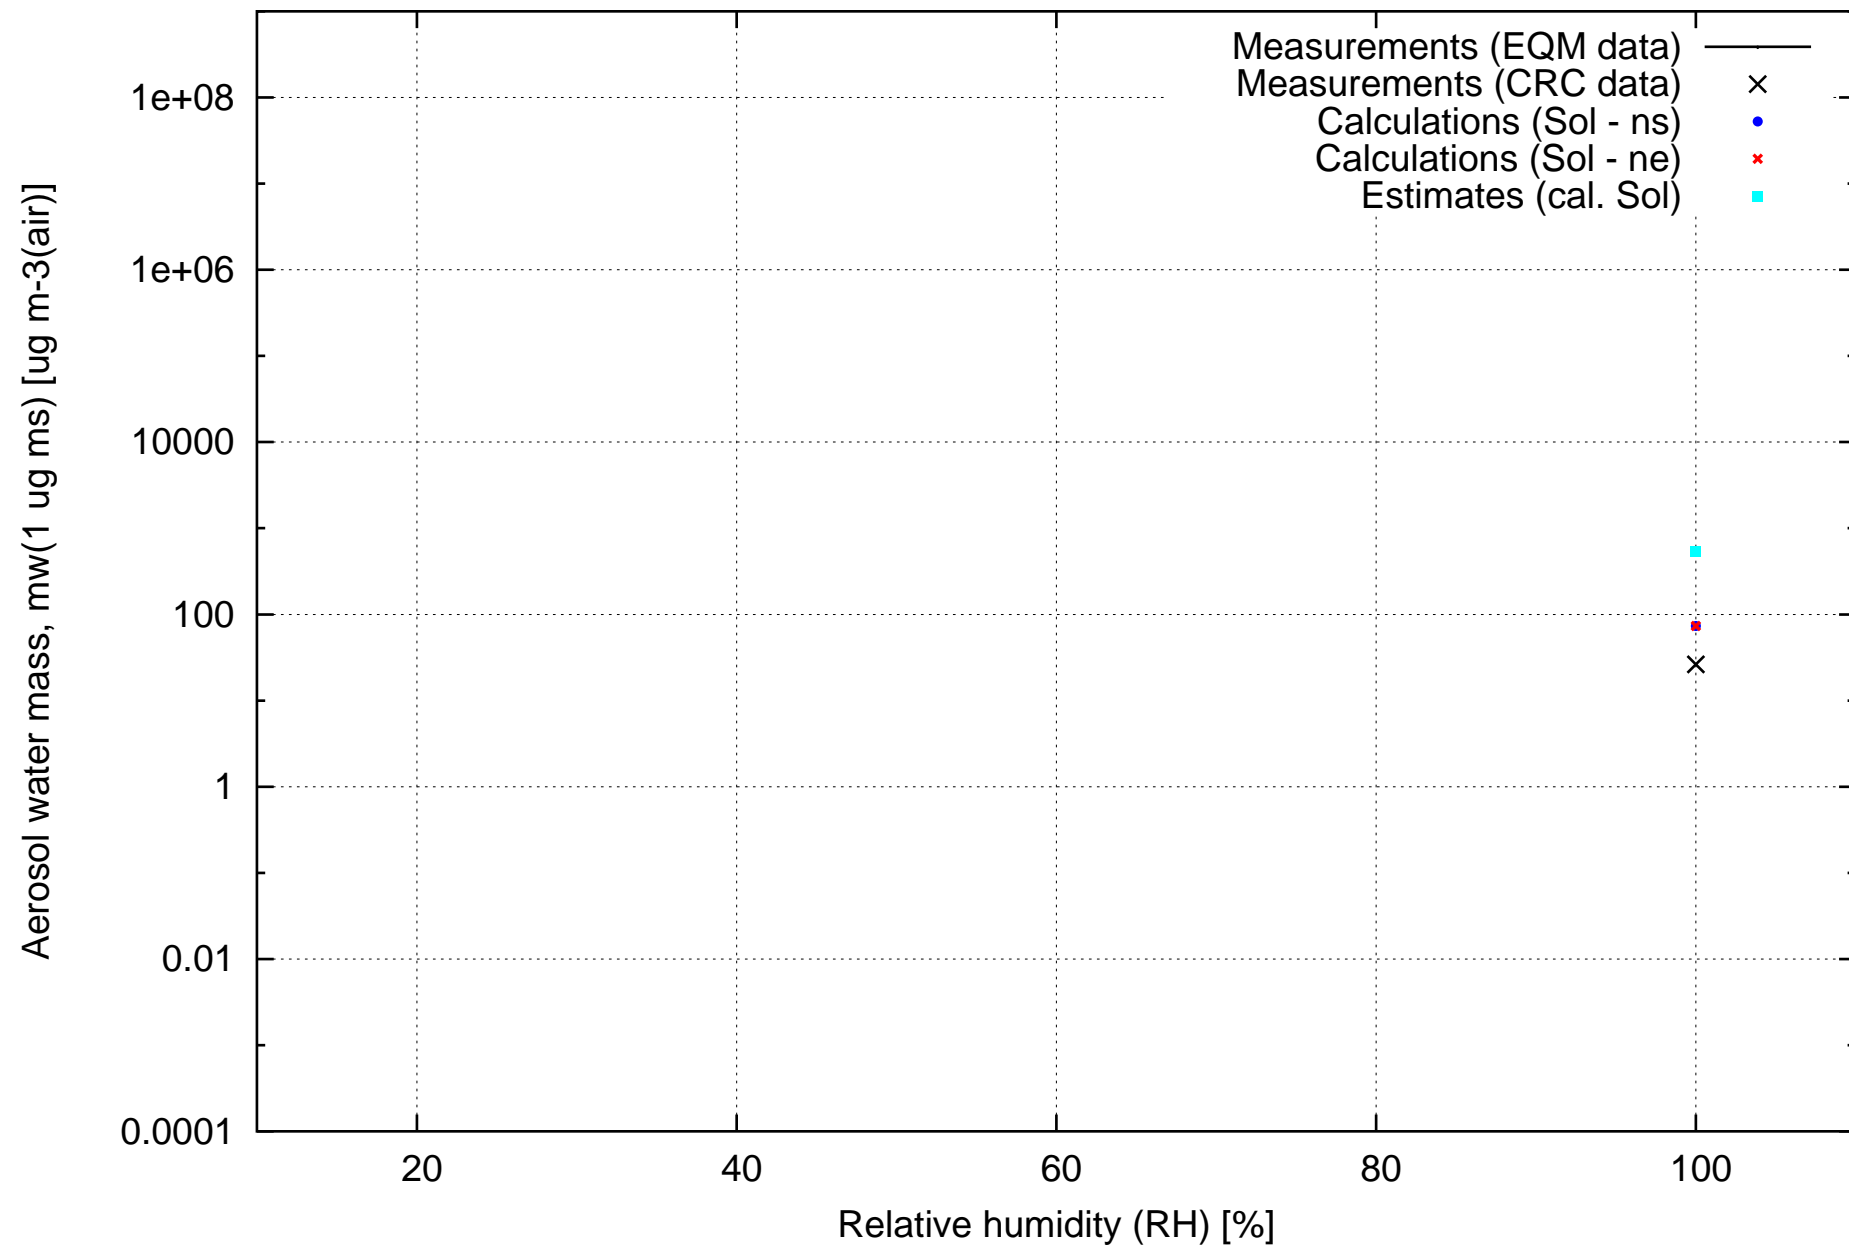

# Sodium sulfate - Na<sub>2</sub>SO<sub>4</sub>

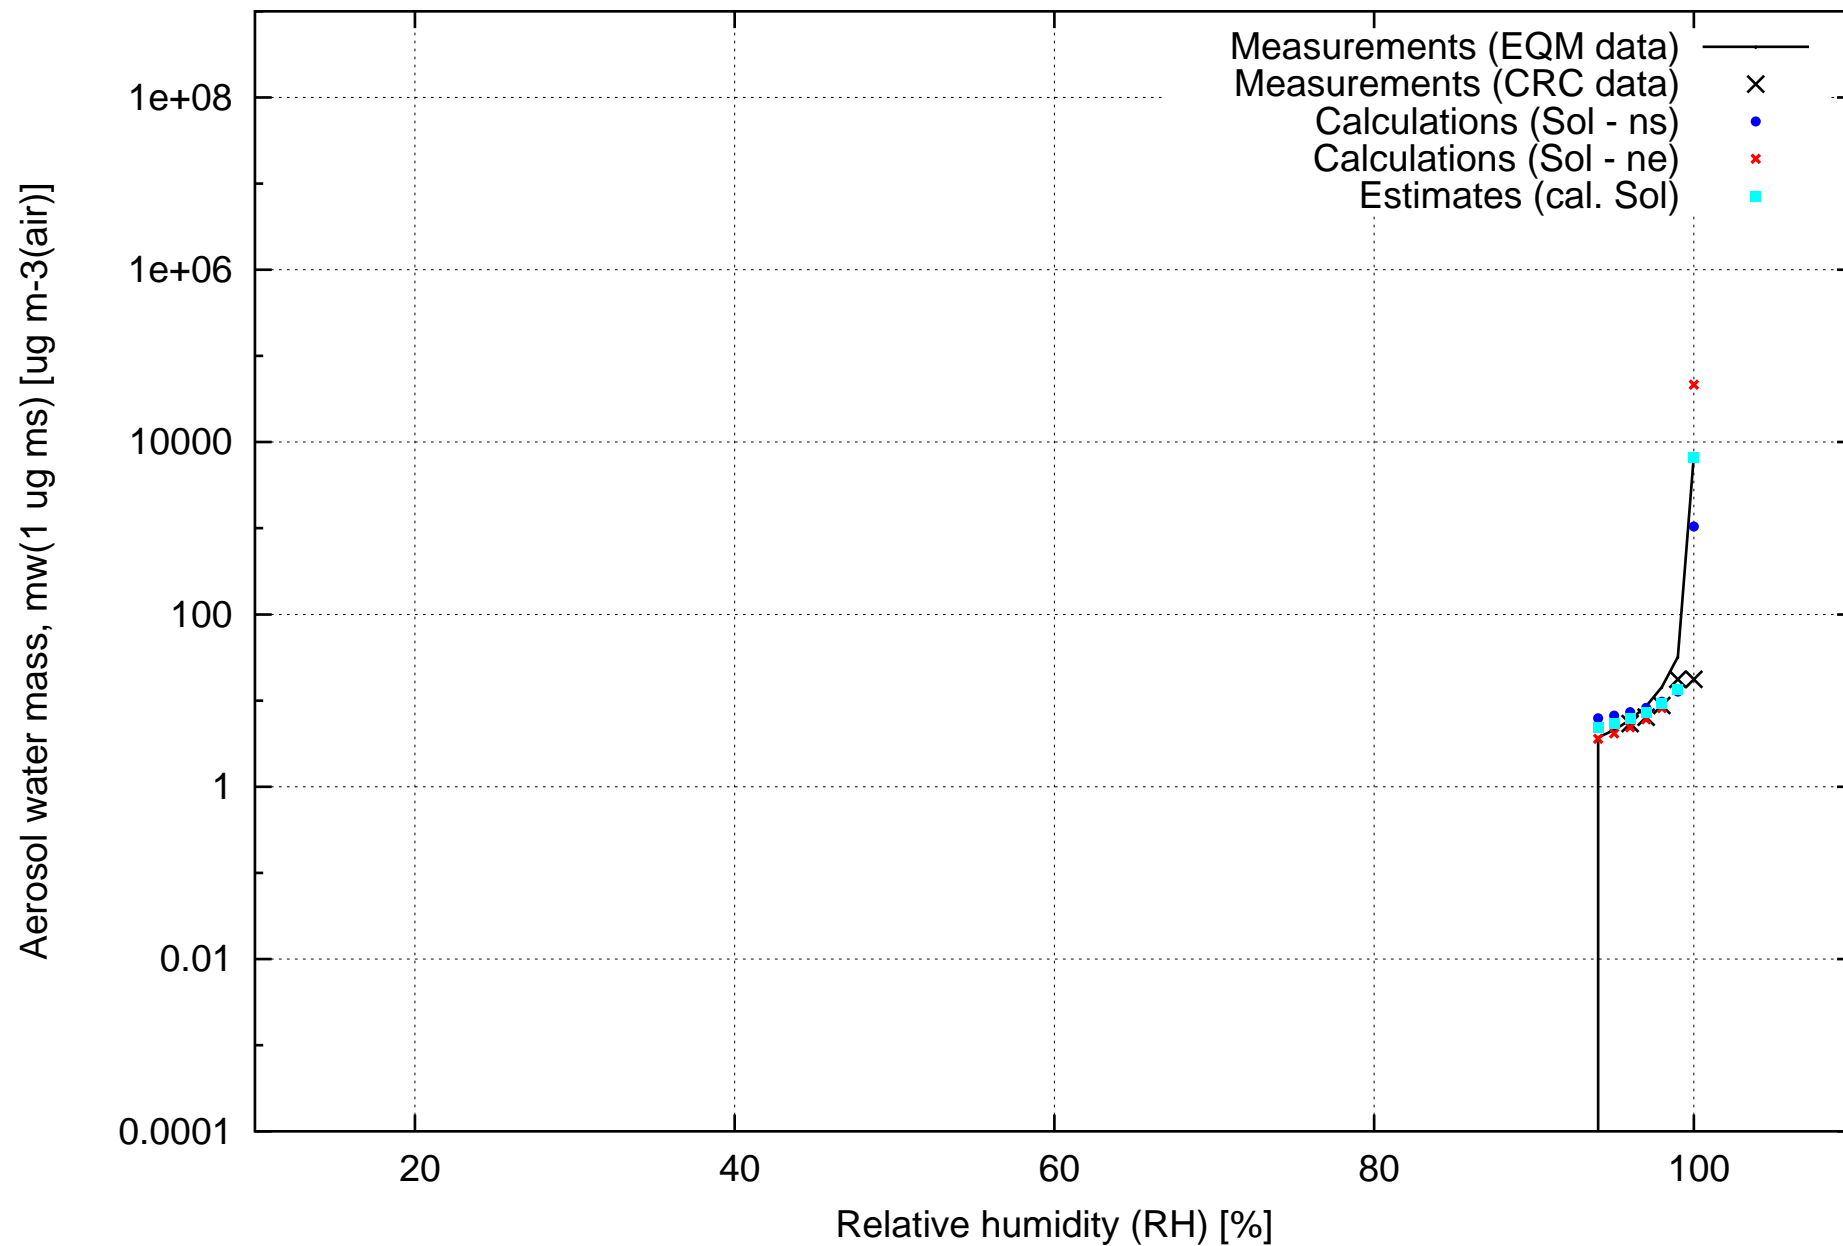

# Sodium hydrogen sulfate - NaHSO<sub>4</sub>

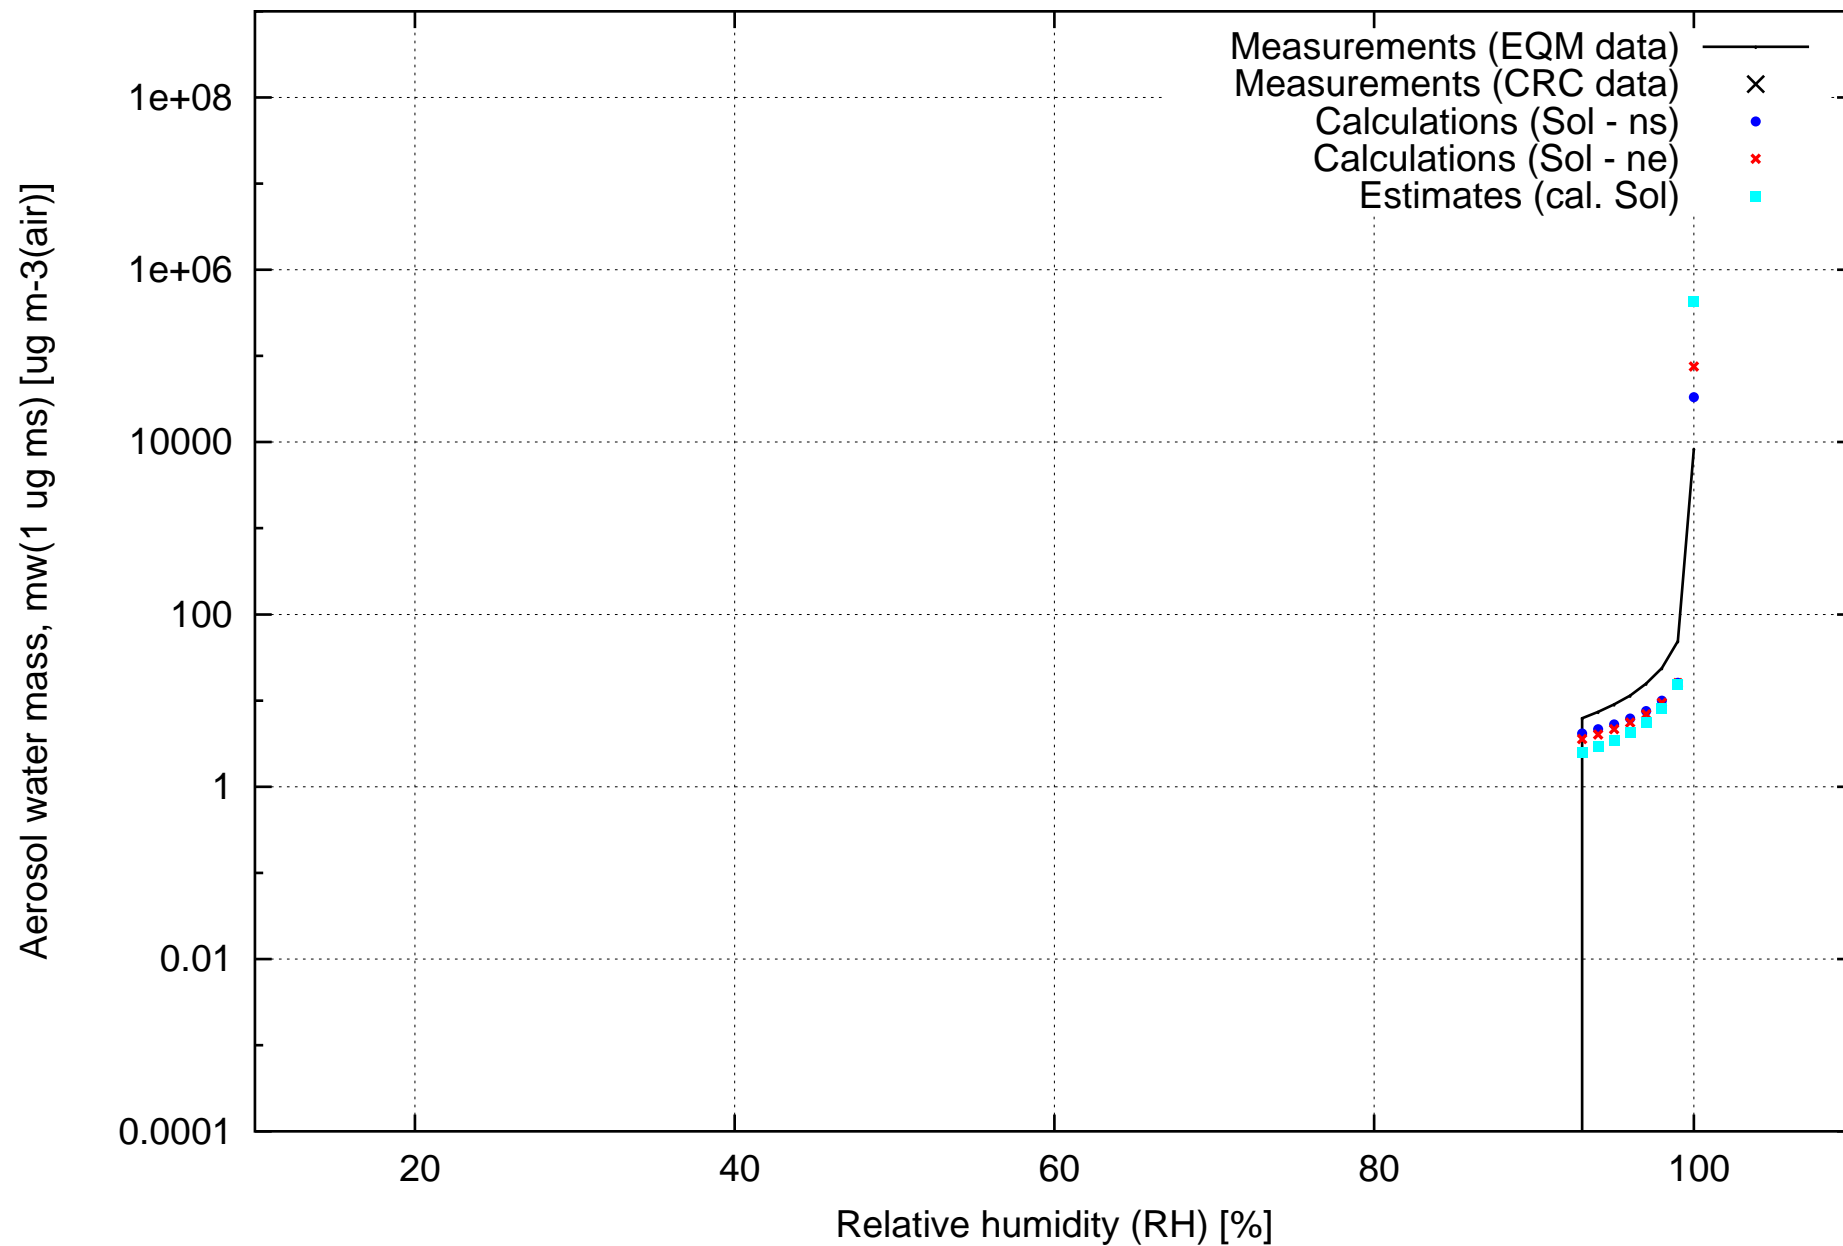

# Sodium nitrate - NaNO<sub>3</sub>

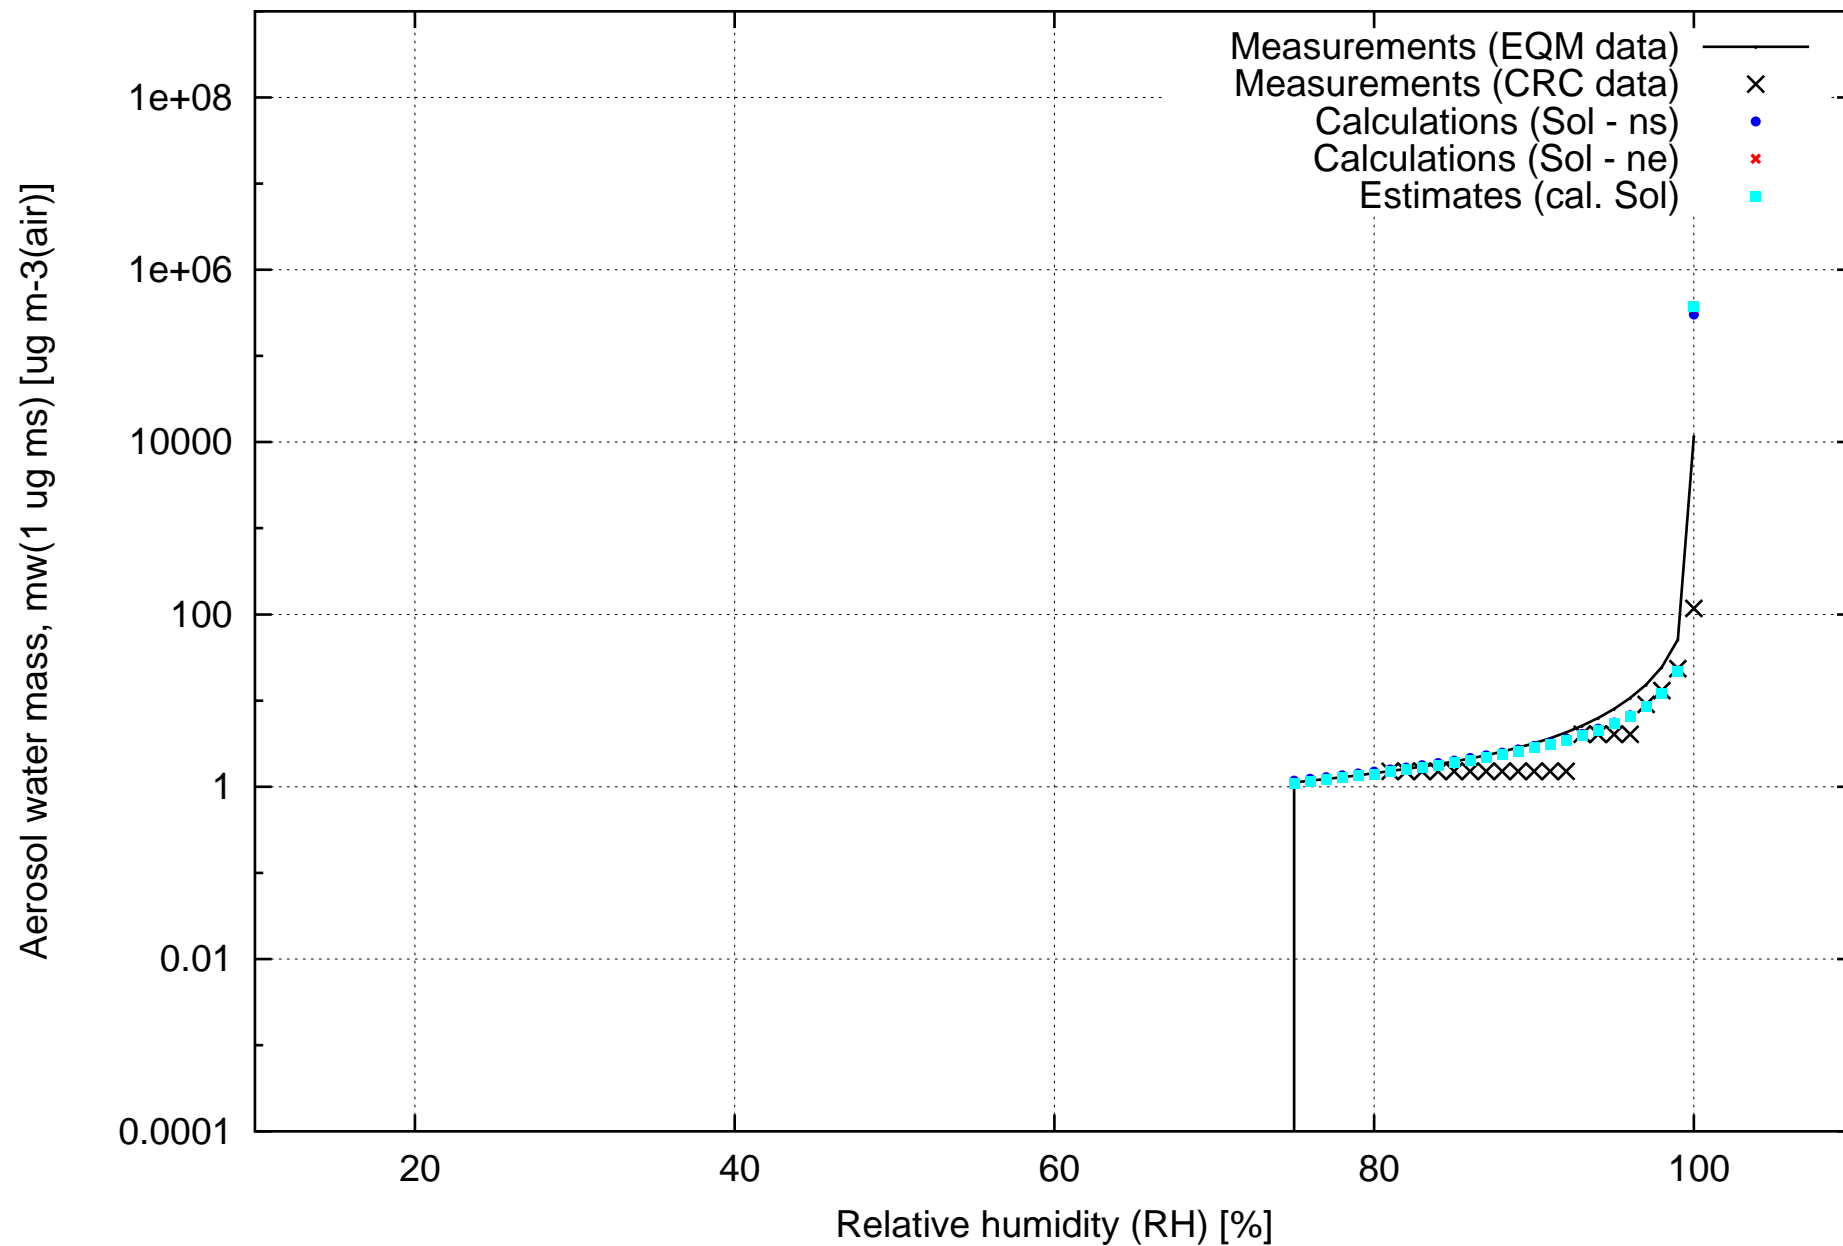



# Sodium chloride - NaCl

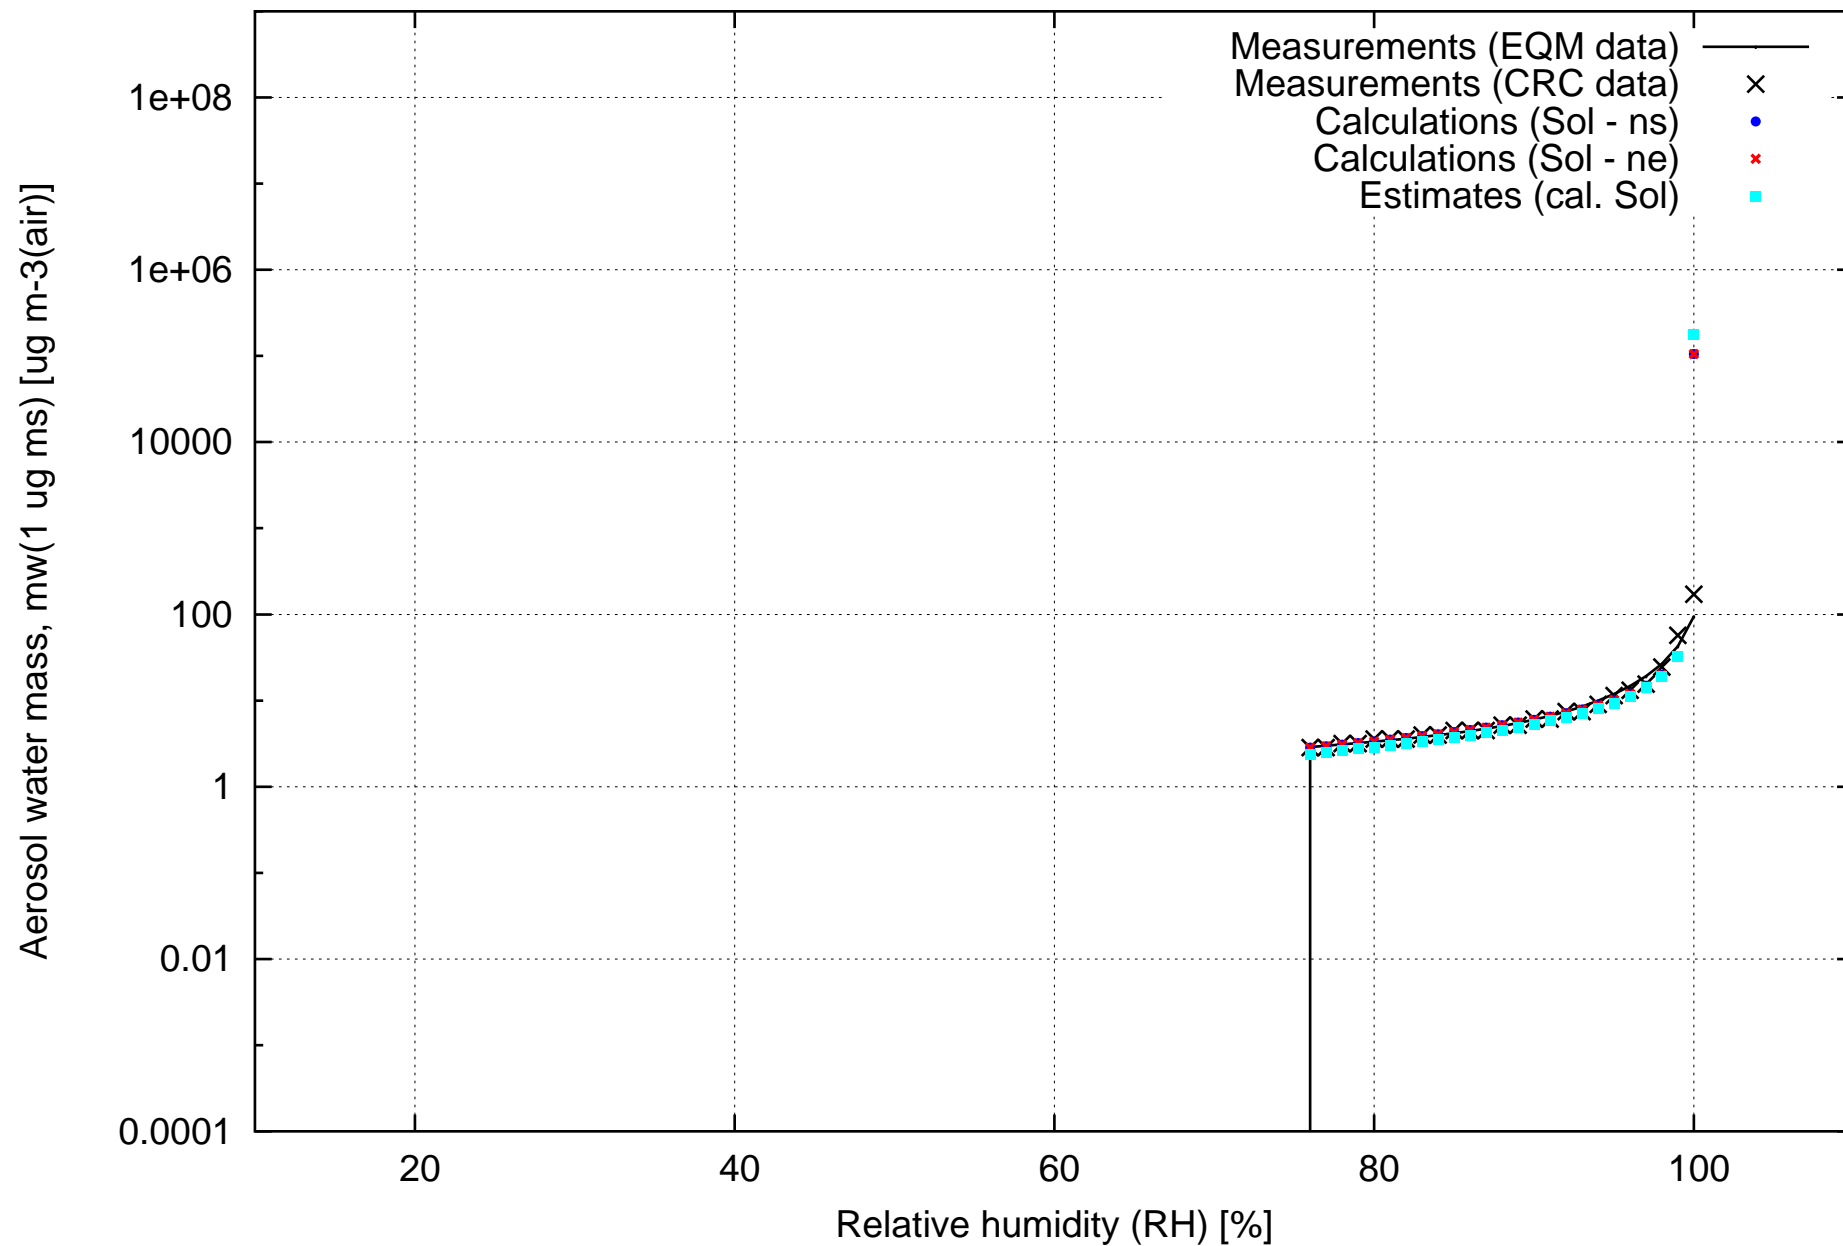

# Sodium bromide - NaBr

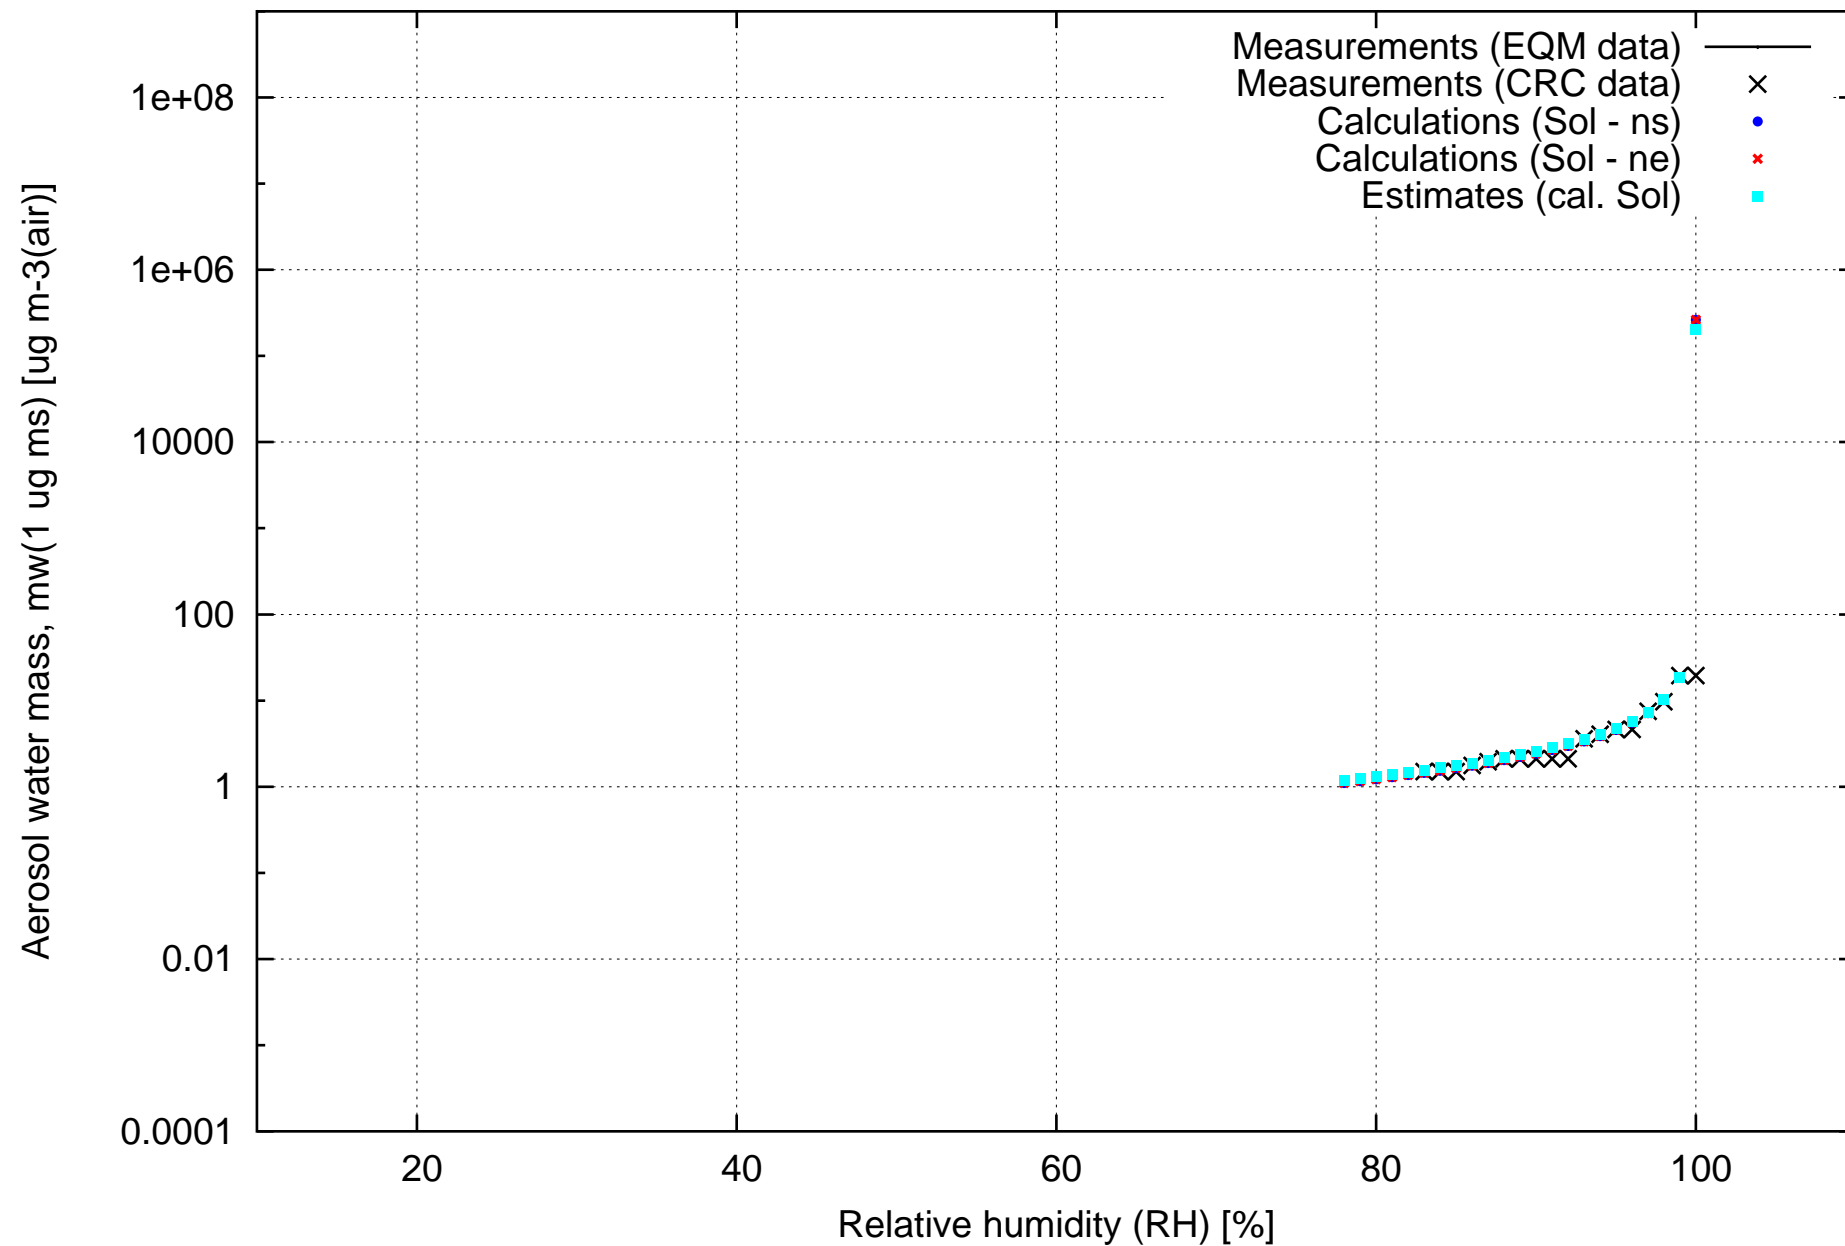

# Sodium iodide - NaI

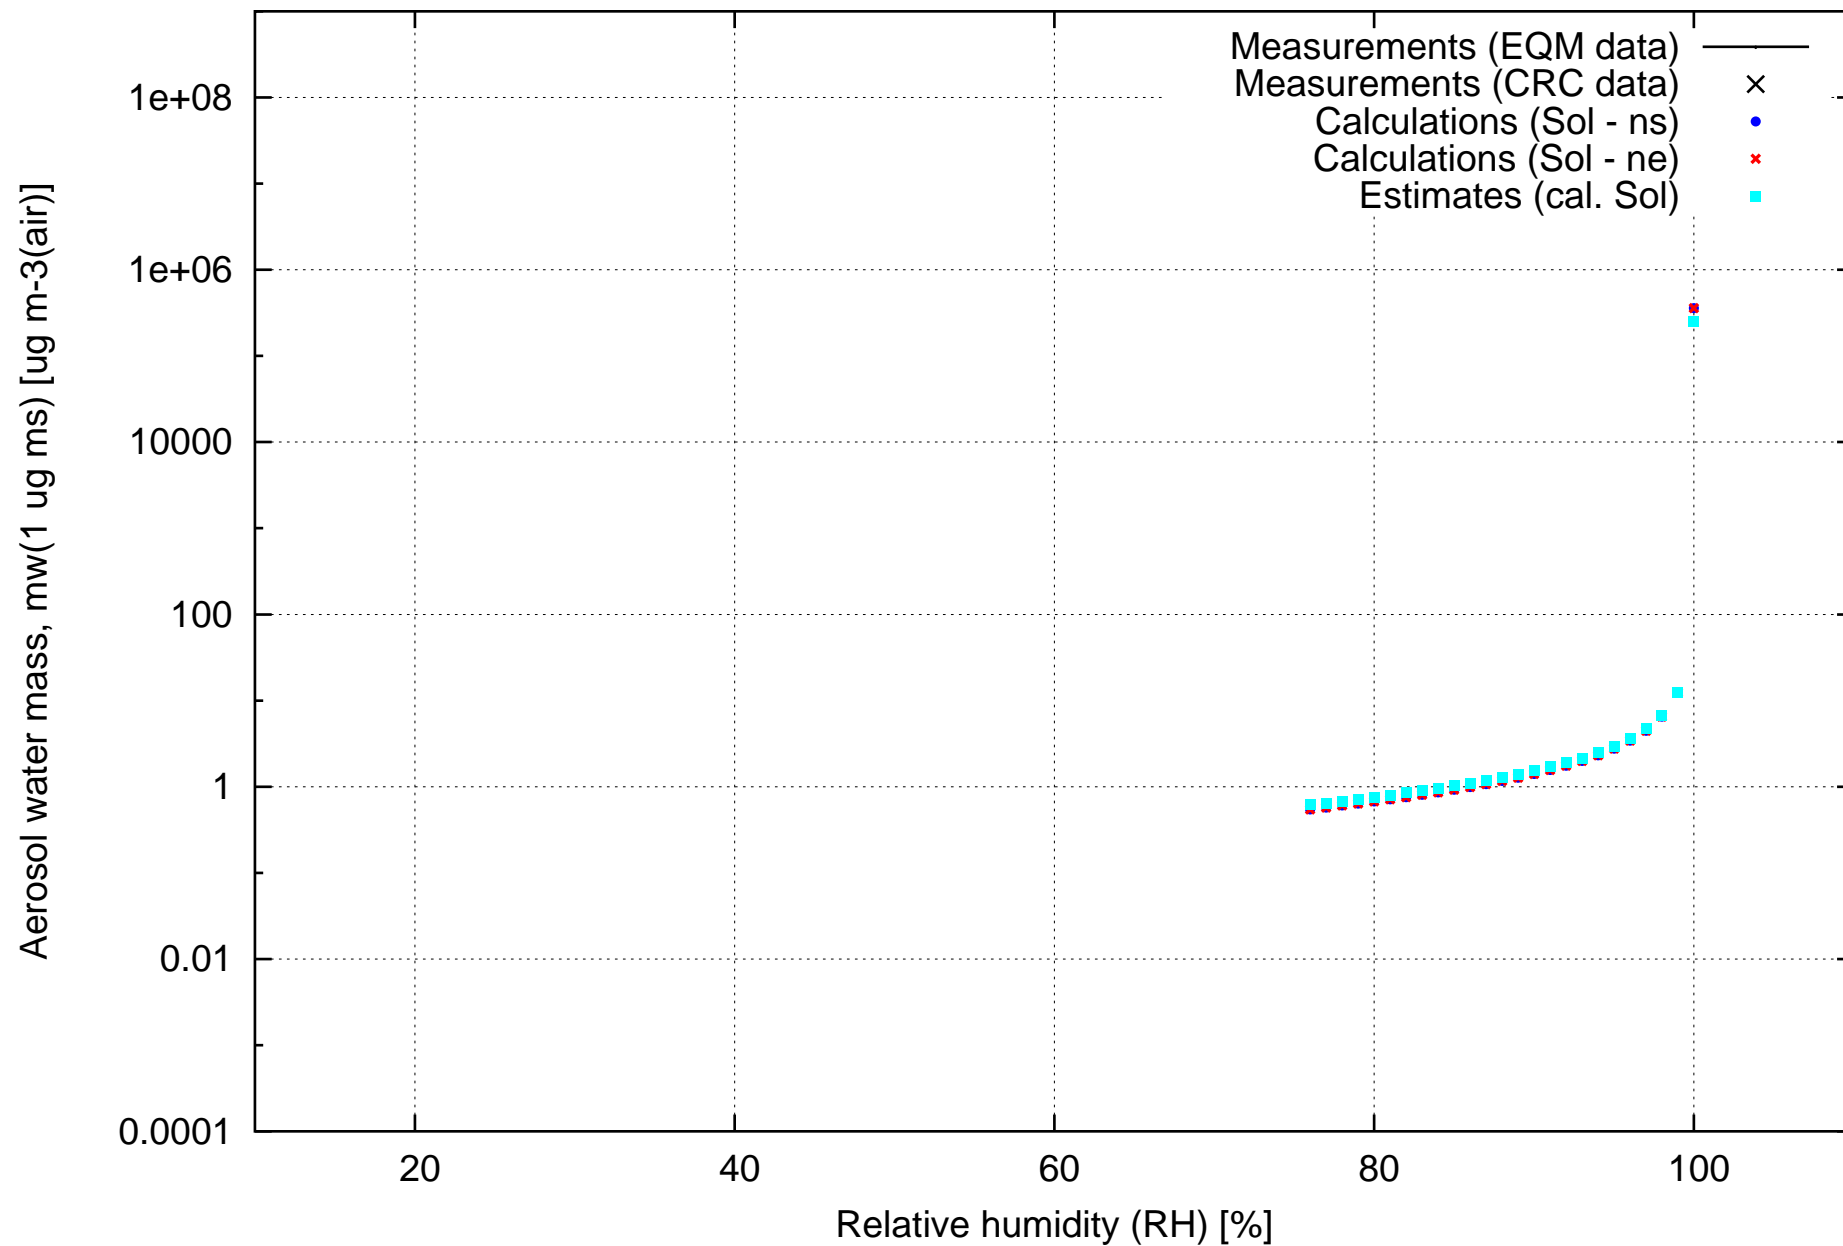

# Sodium carbonate - Na<sub>2</sub>CO<sub>3</sub>

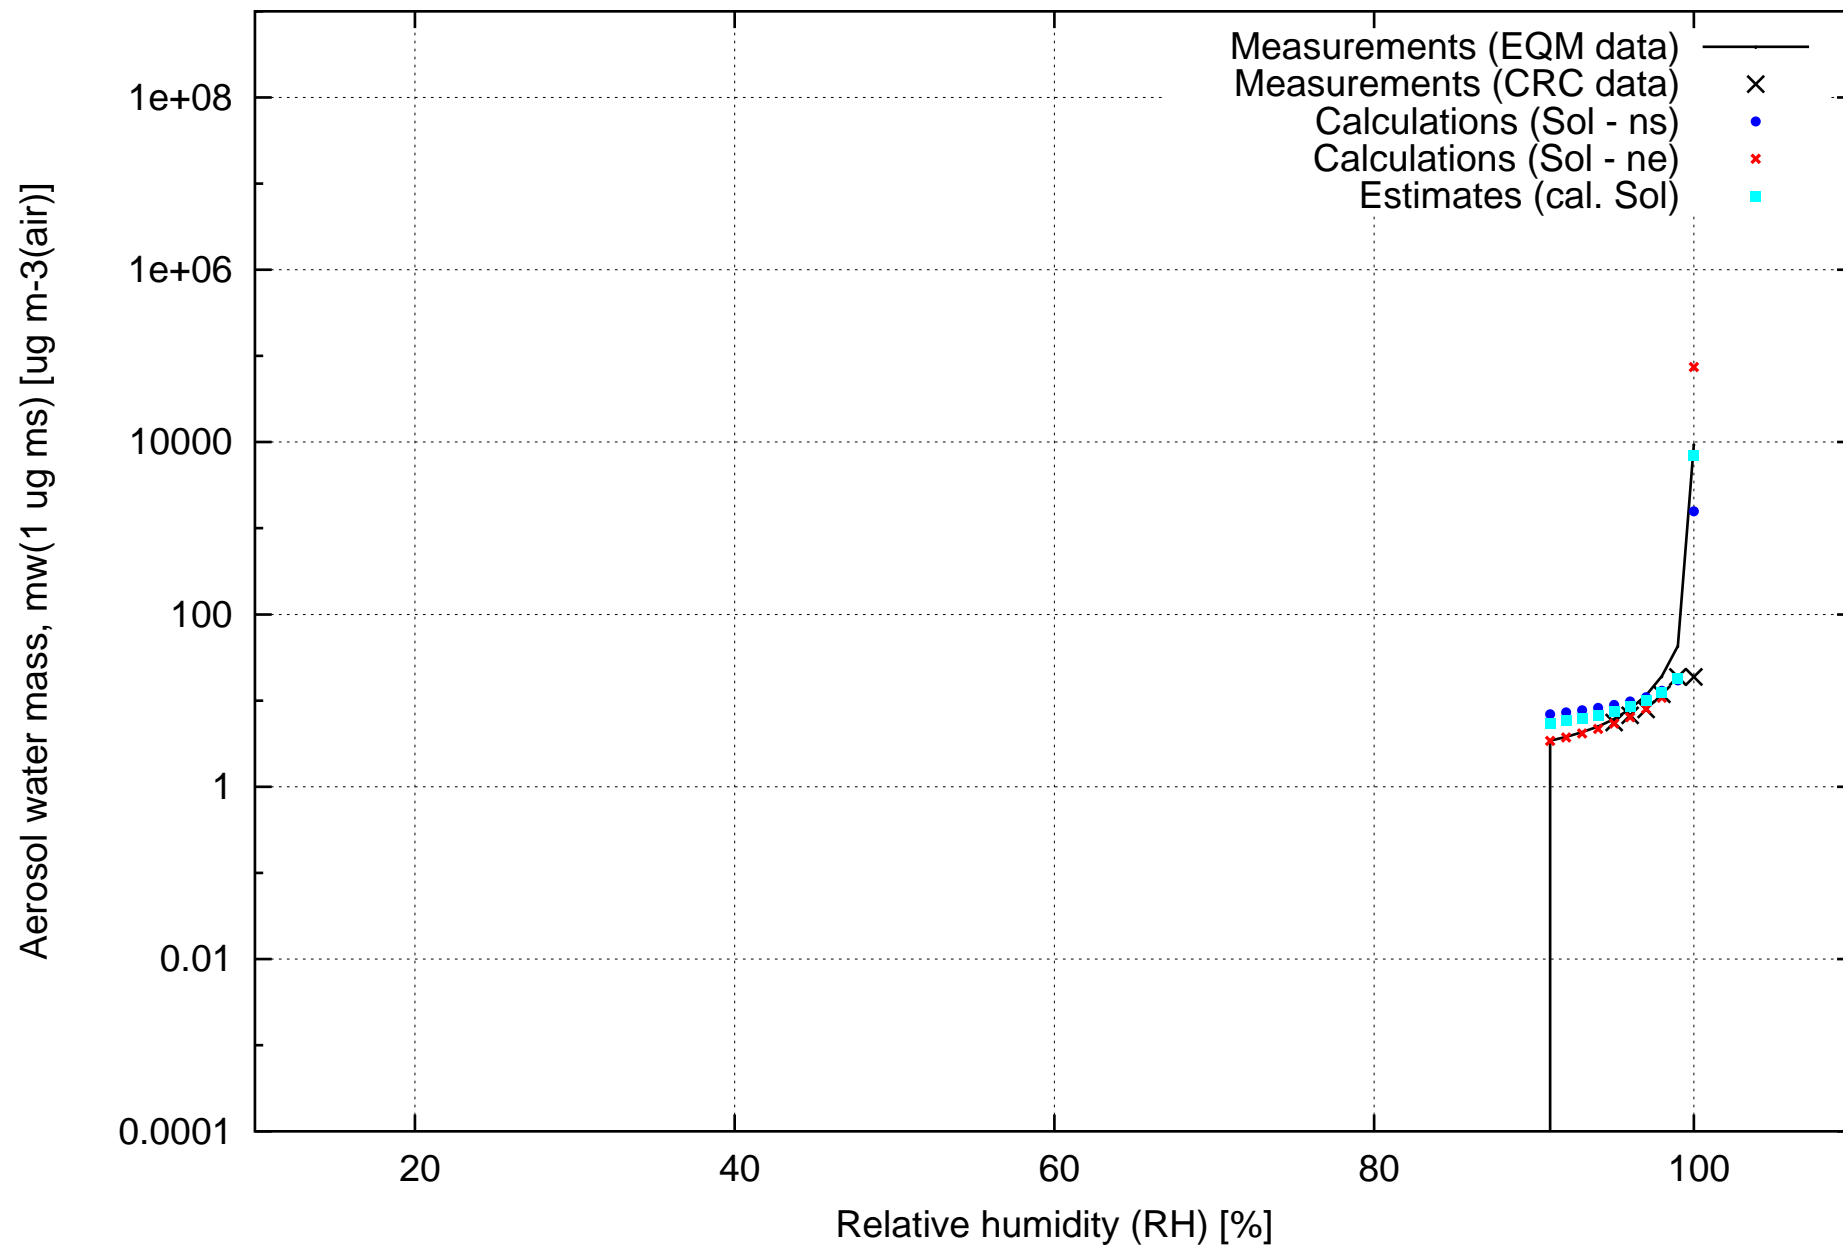

# Sodium hydrogen carbonate - NaHCO<sub>3</sub>

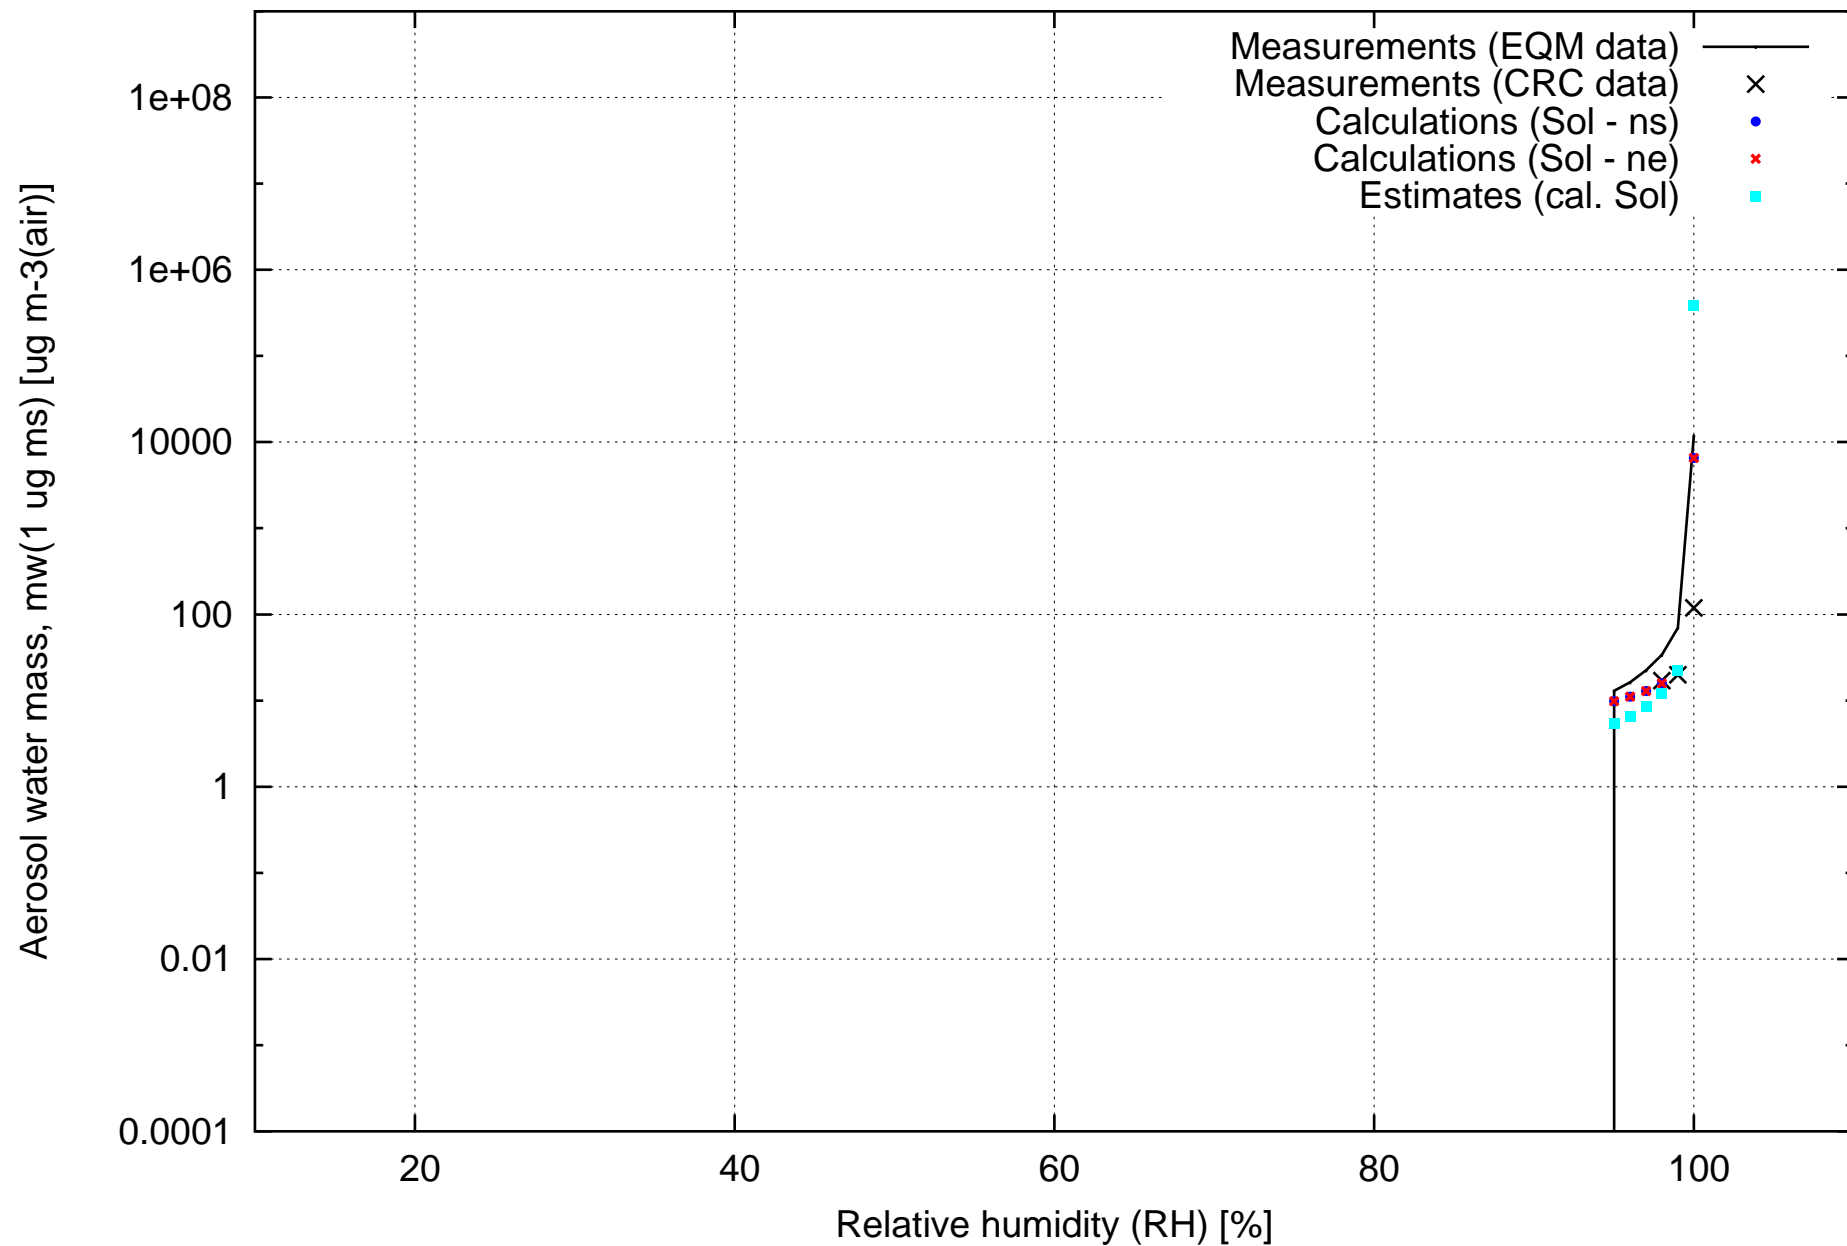

# Sodium hydroxide - NaOH

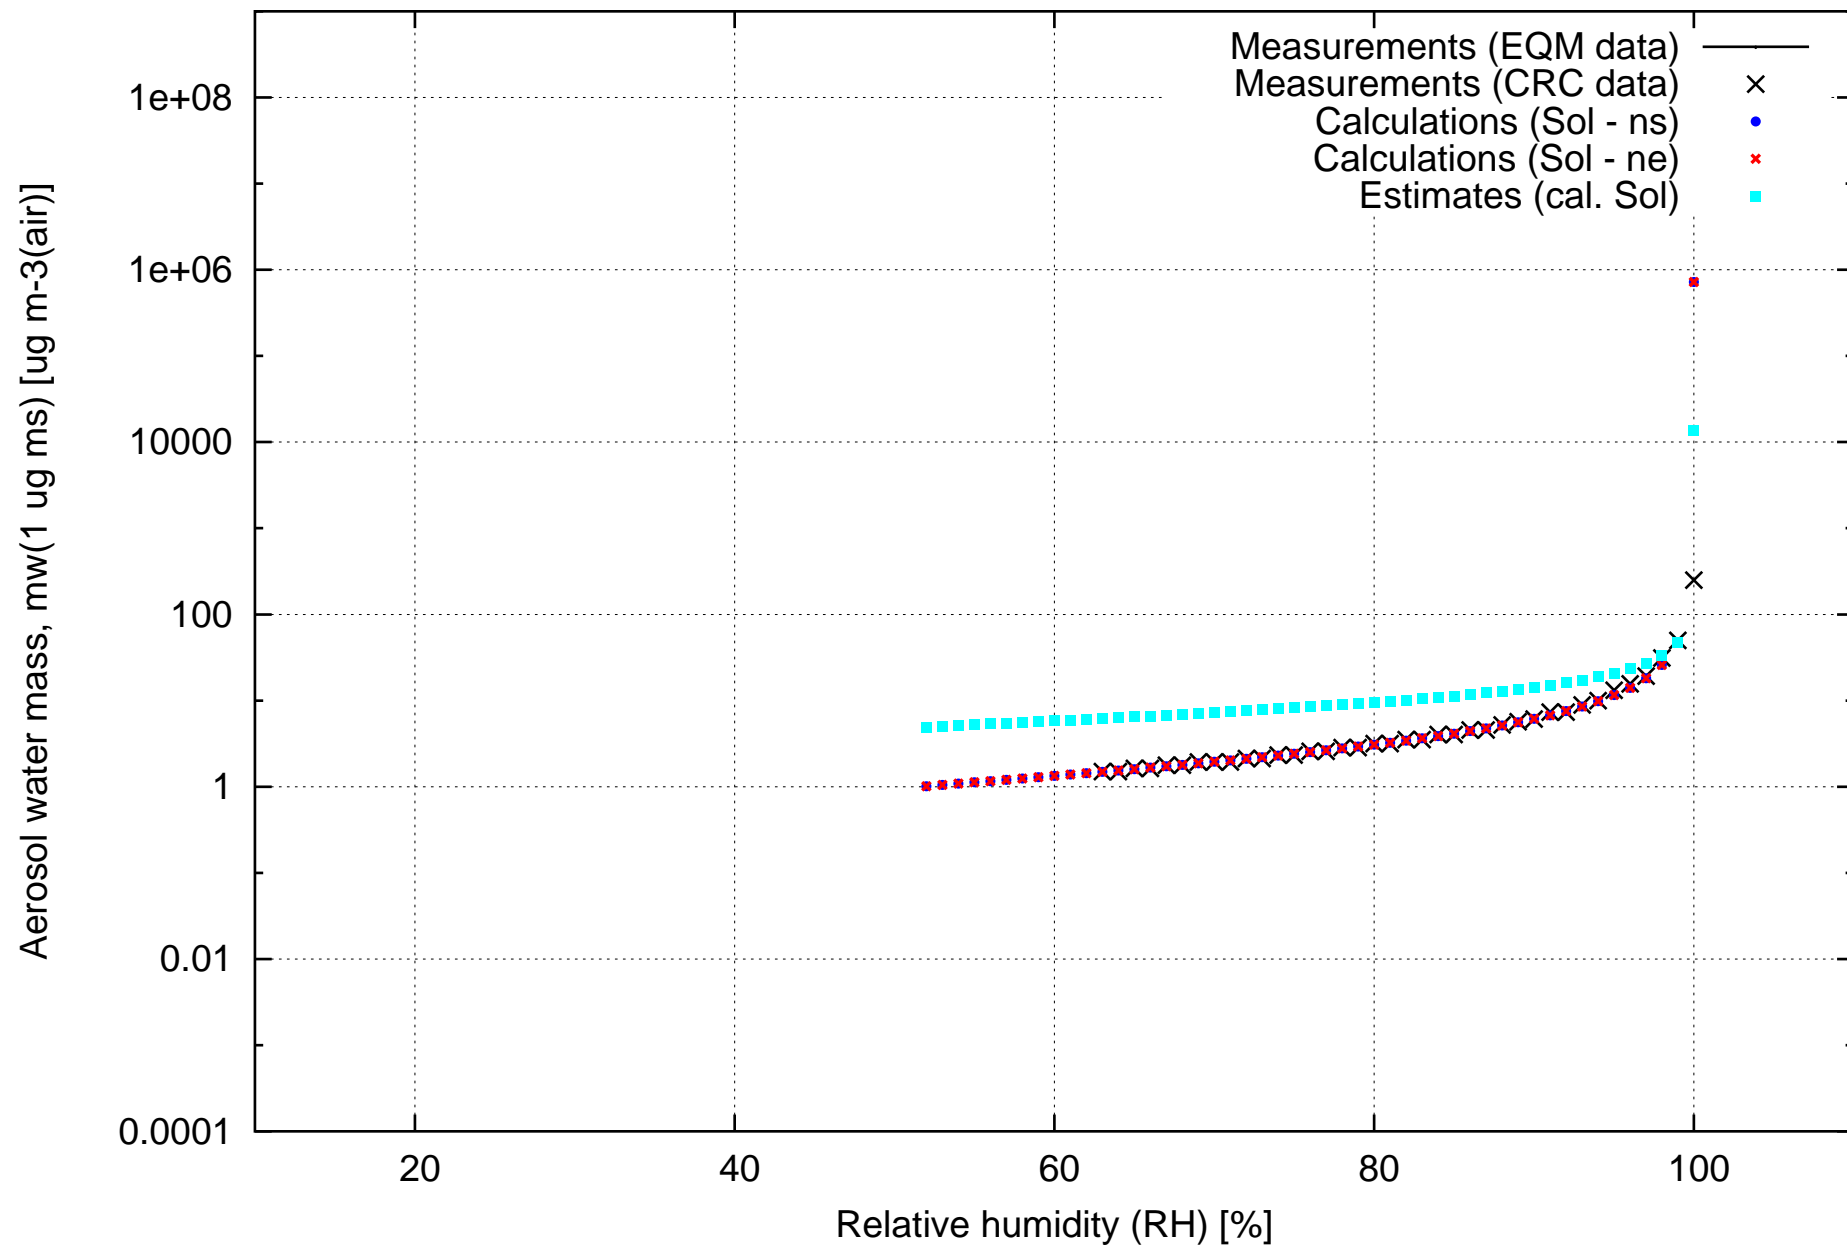

Sodium formate -  $\text{NaCHO}_2 = \text{H}(\text{COONa})$

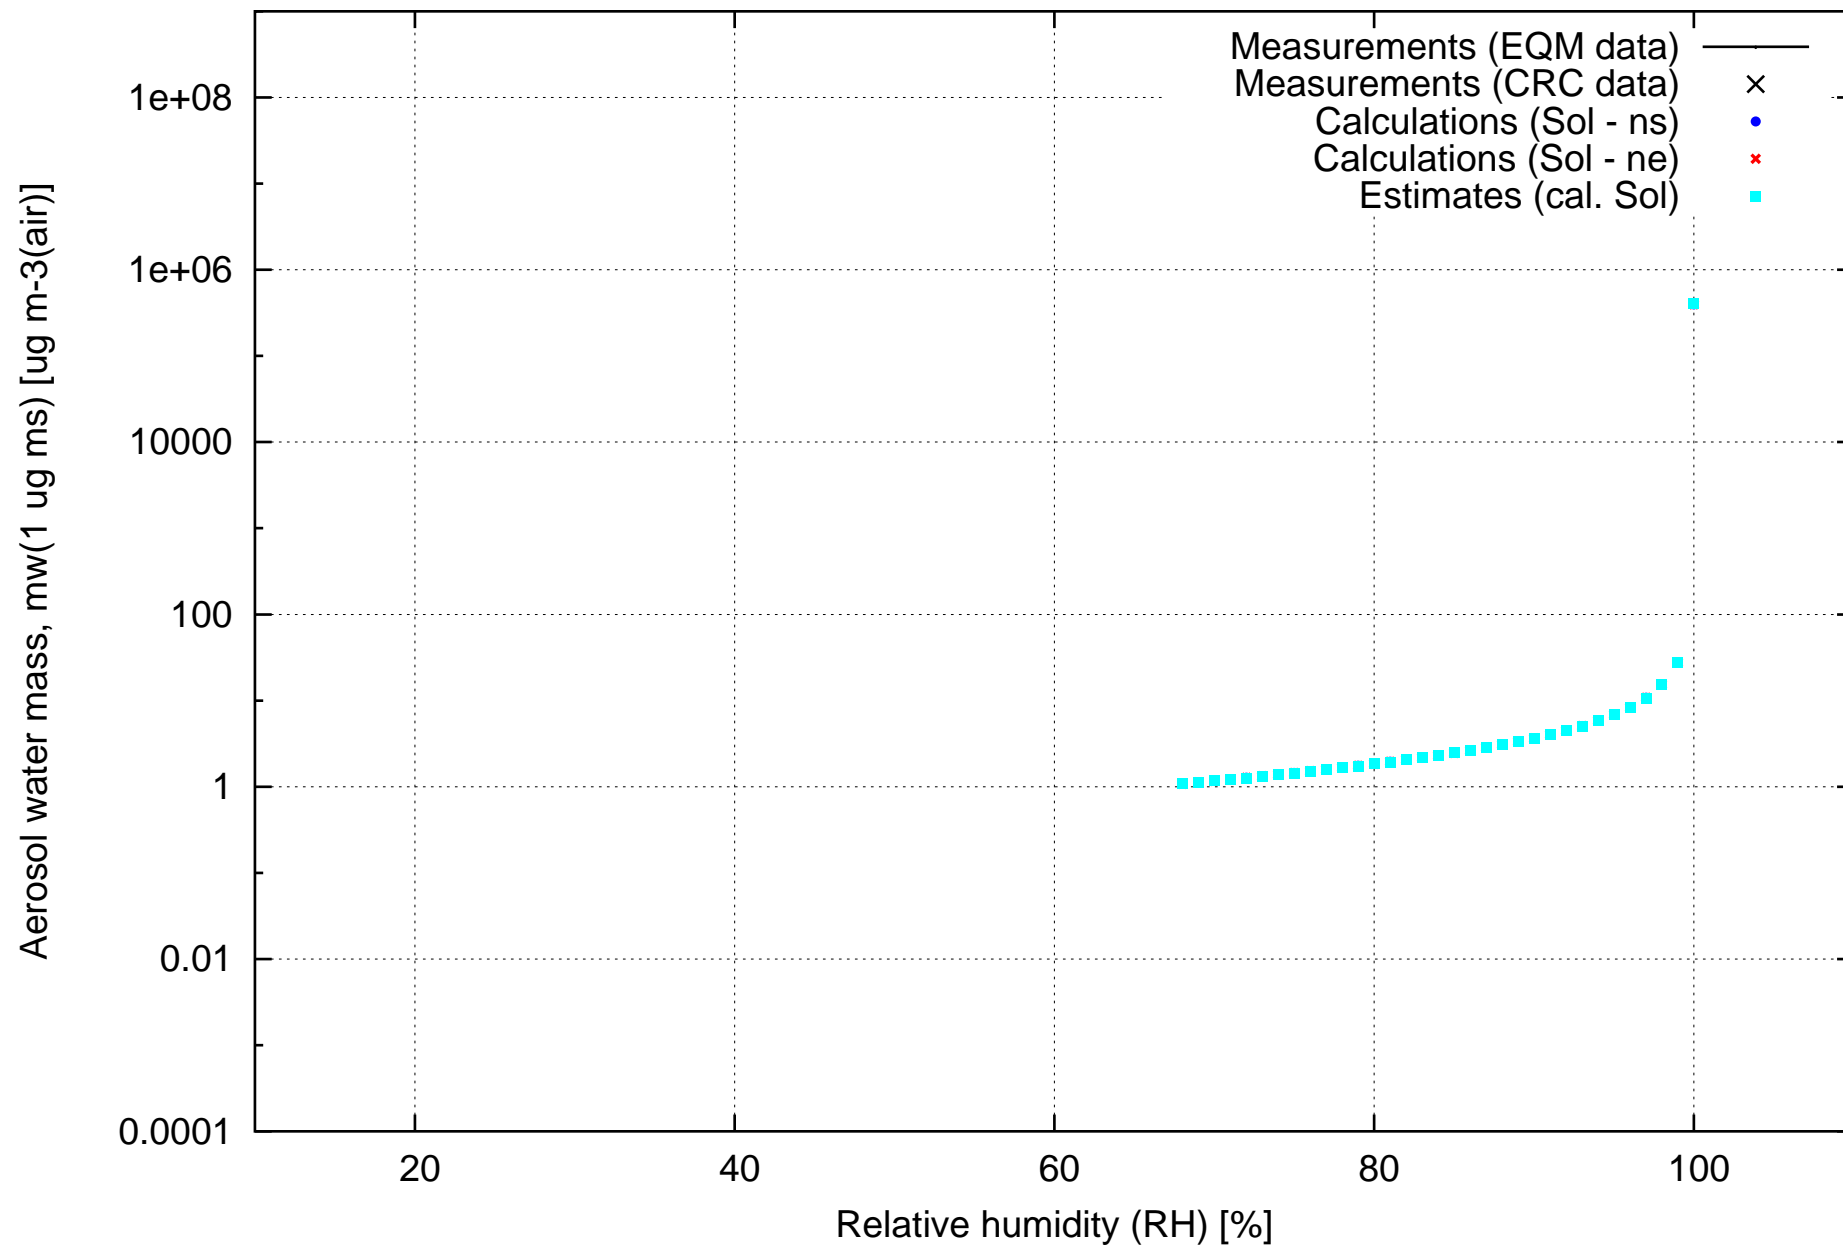

Sodium acetate -  $\text{NaC}_2\text{H}_3\text{O}_2 = \text{CH}_3(\text{COONa})$

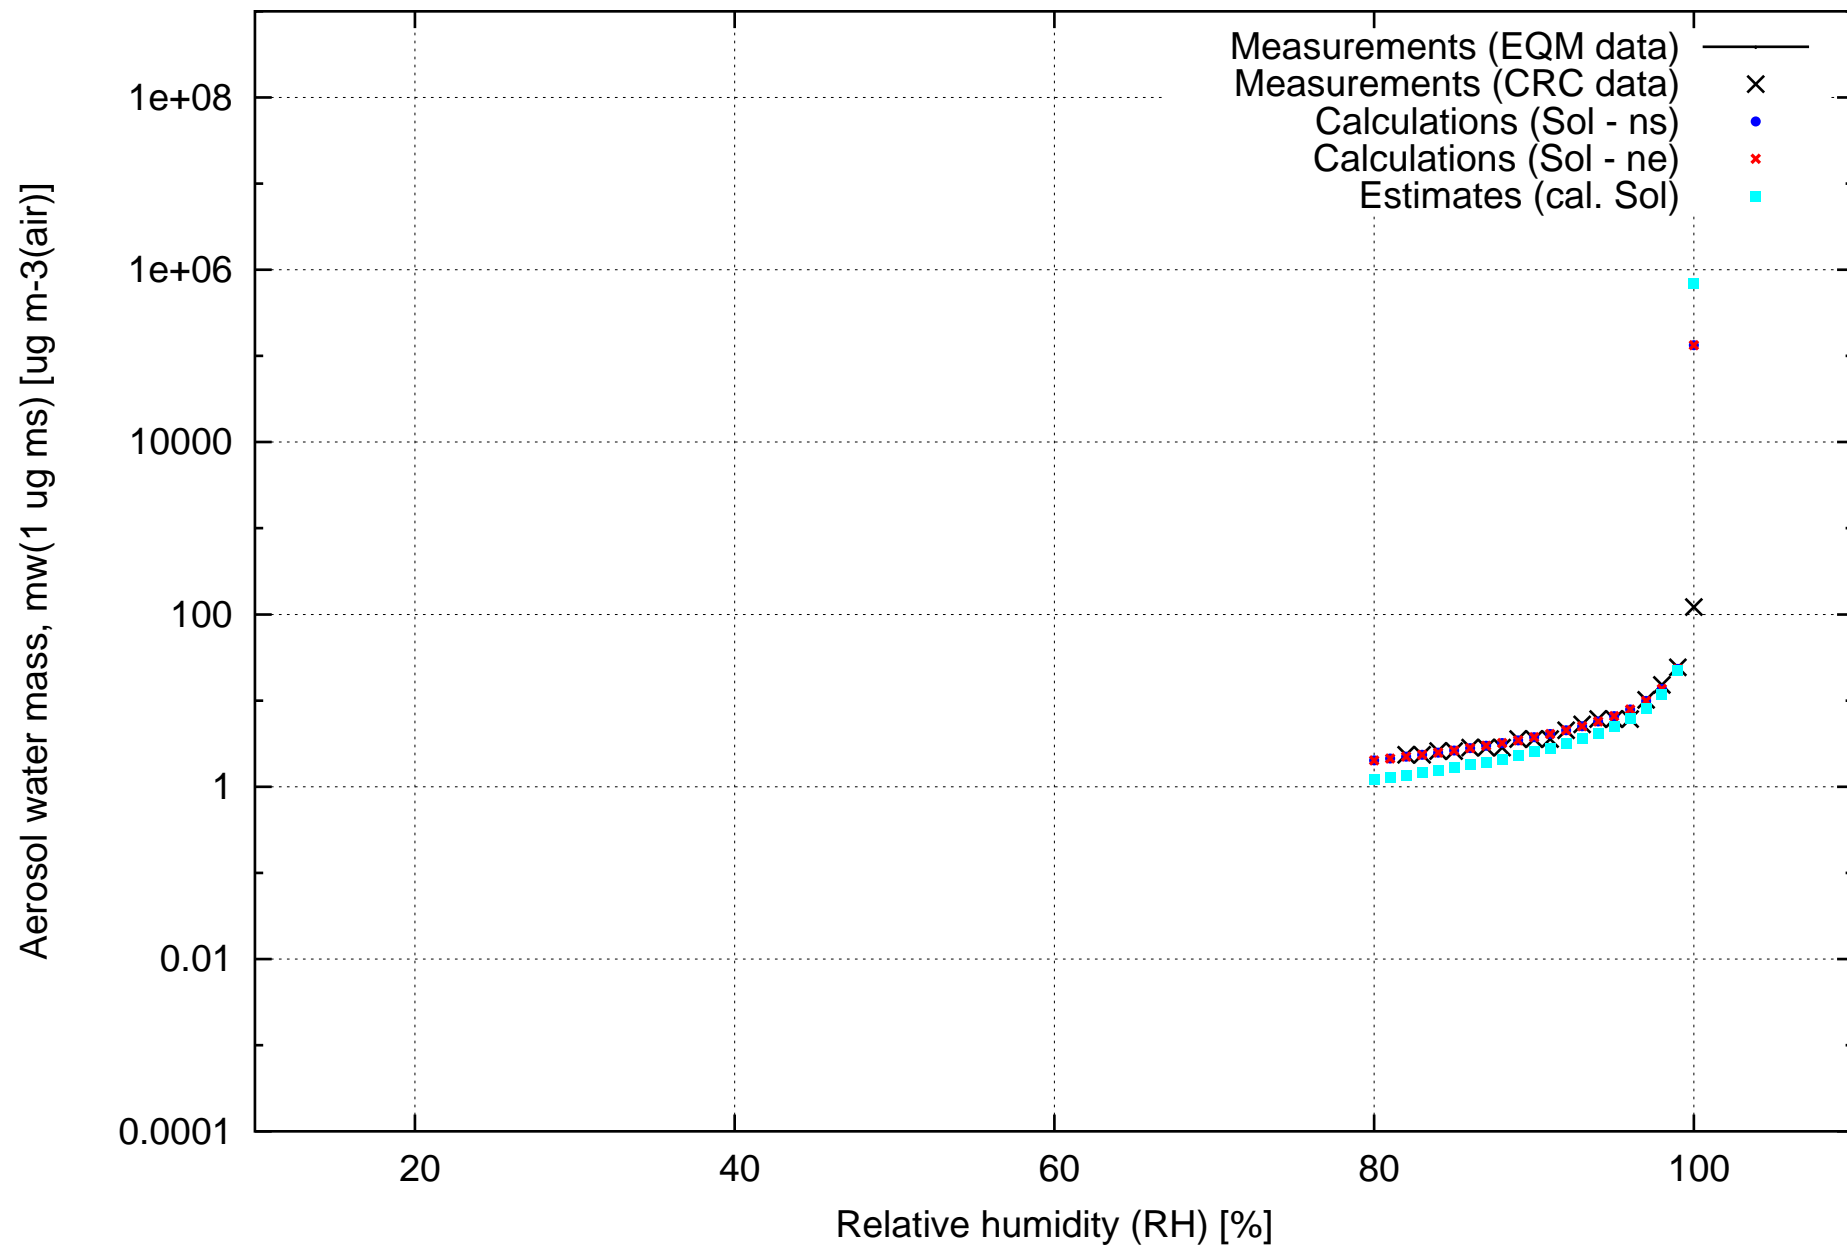



Sodium oxalate -  $\text{Na}_2\text{C}_2\text{O}_4 = (\text{COONa})_2$

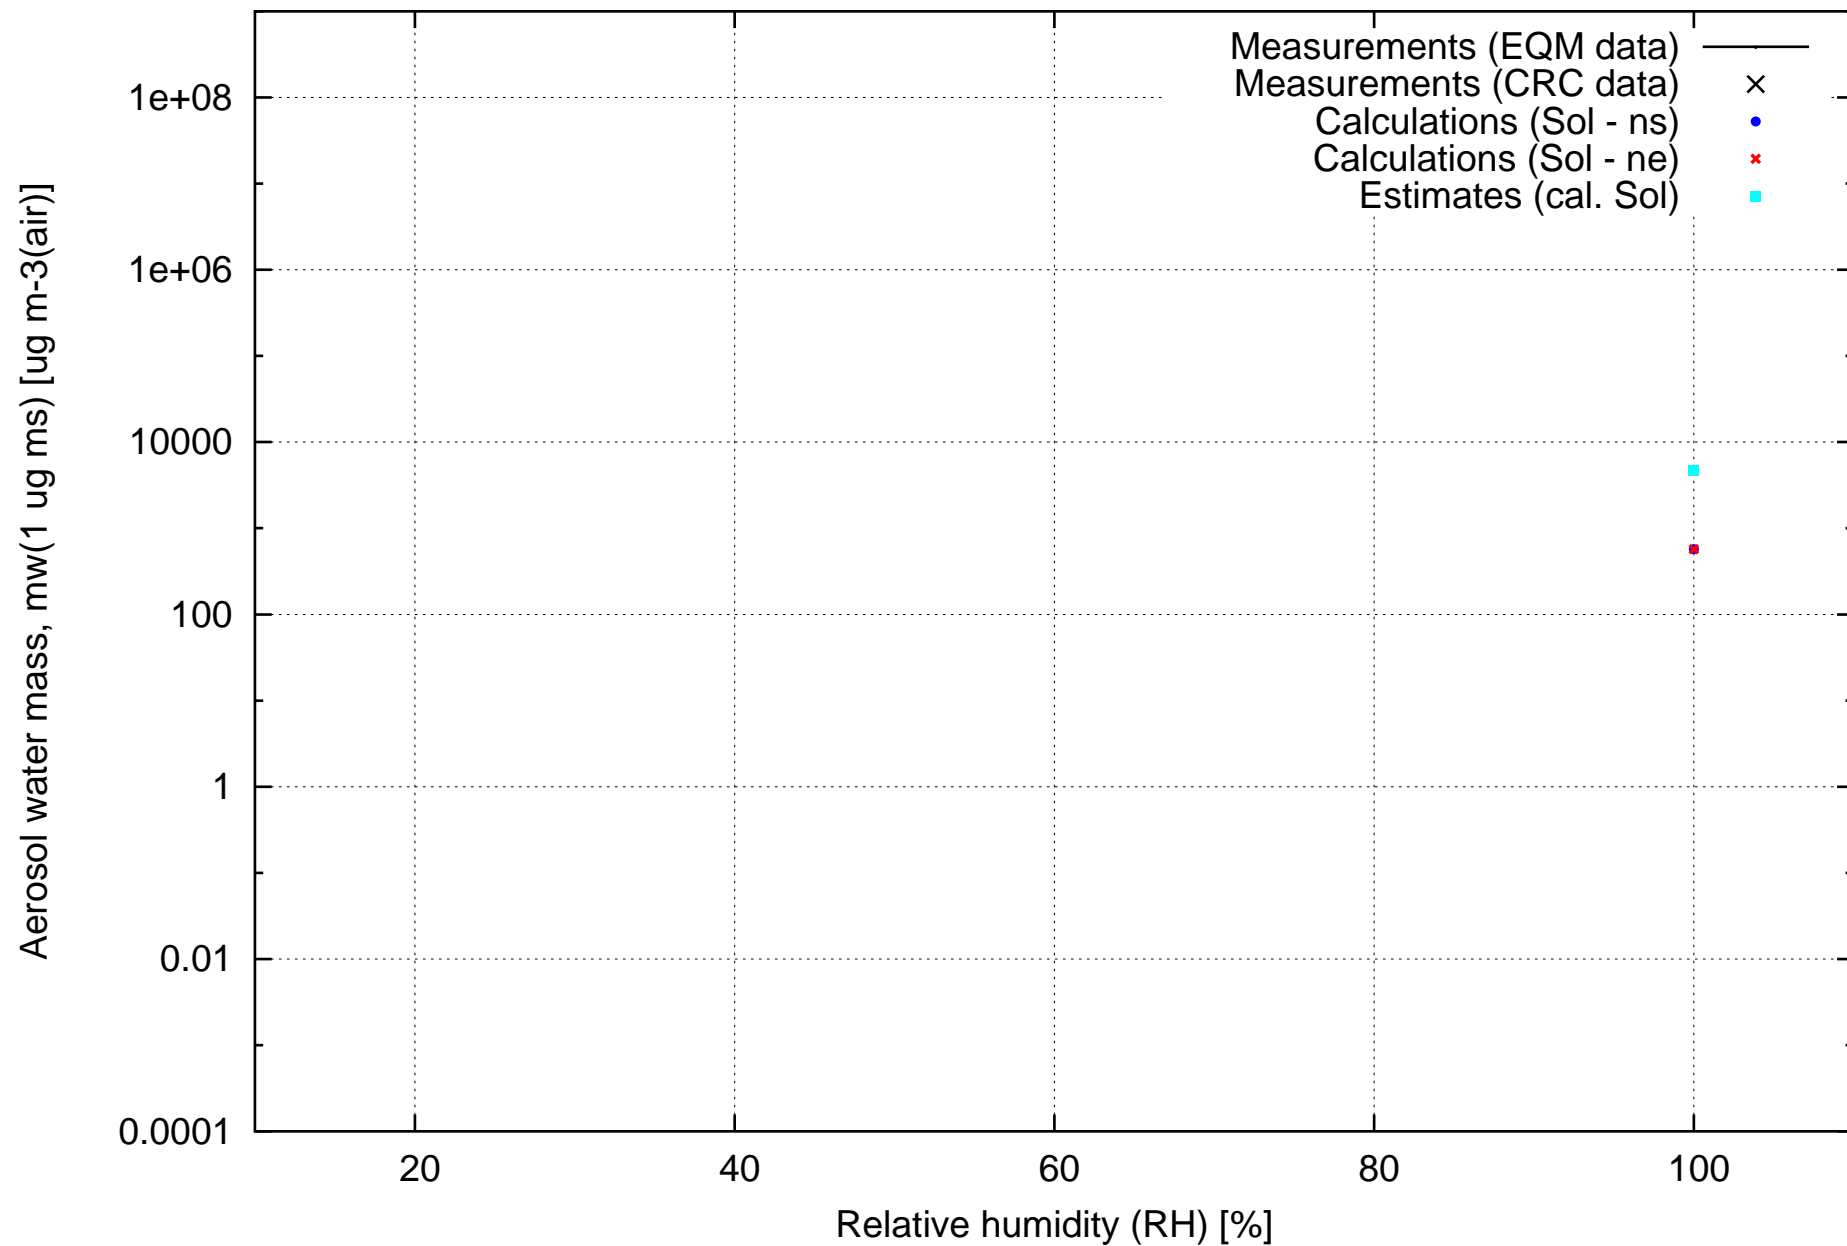

Sodium citrate -  $\text{Na}_3\text{C}_6\text{H}_5\text{O}_7 = (\text{HO})\text{C}(\text{COONa})_3$

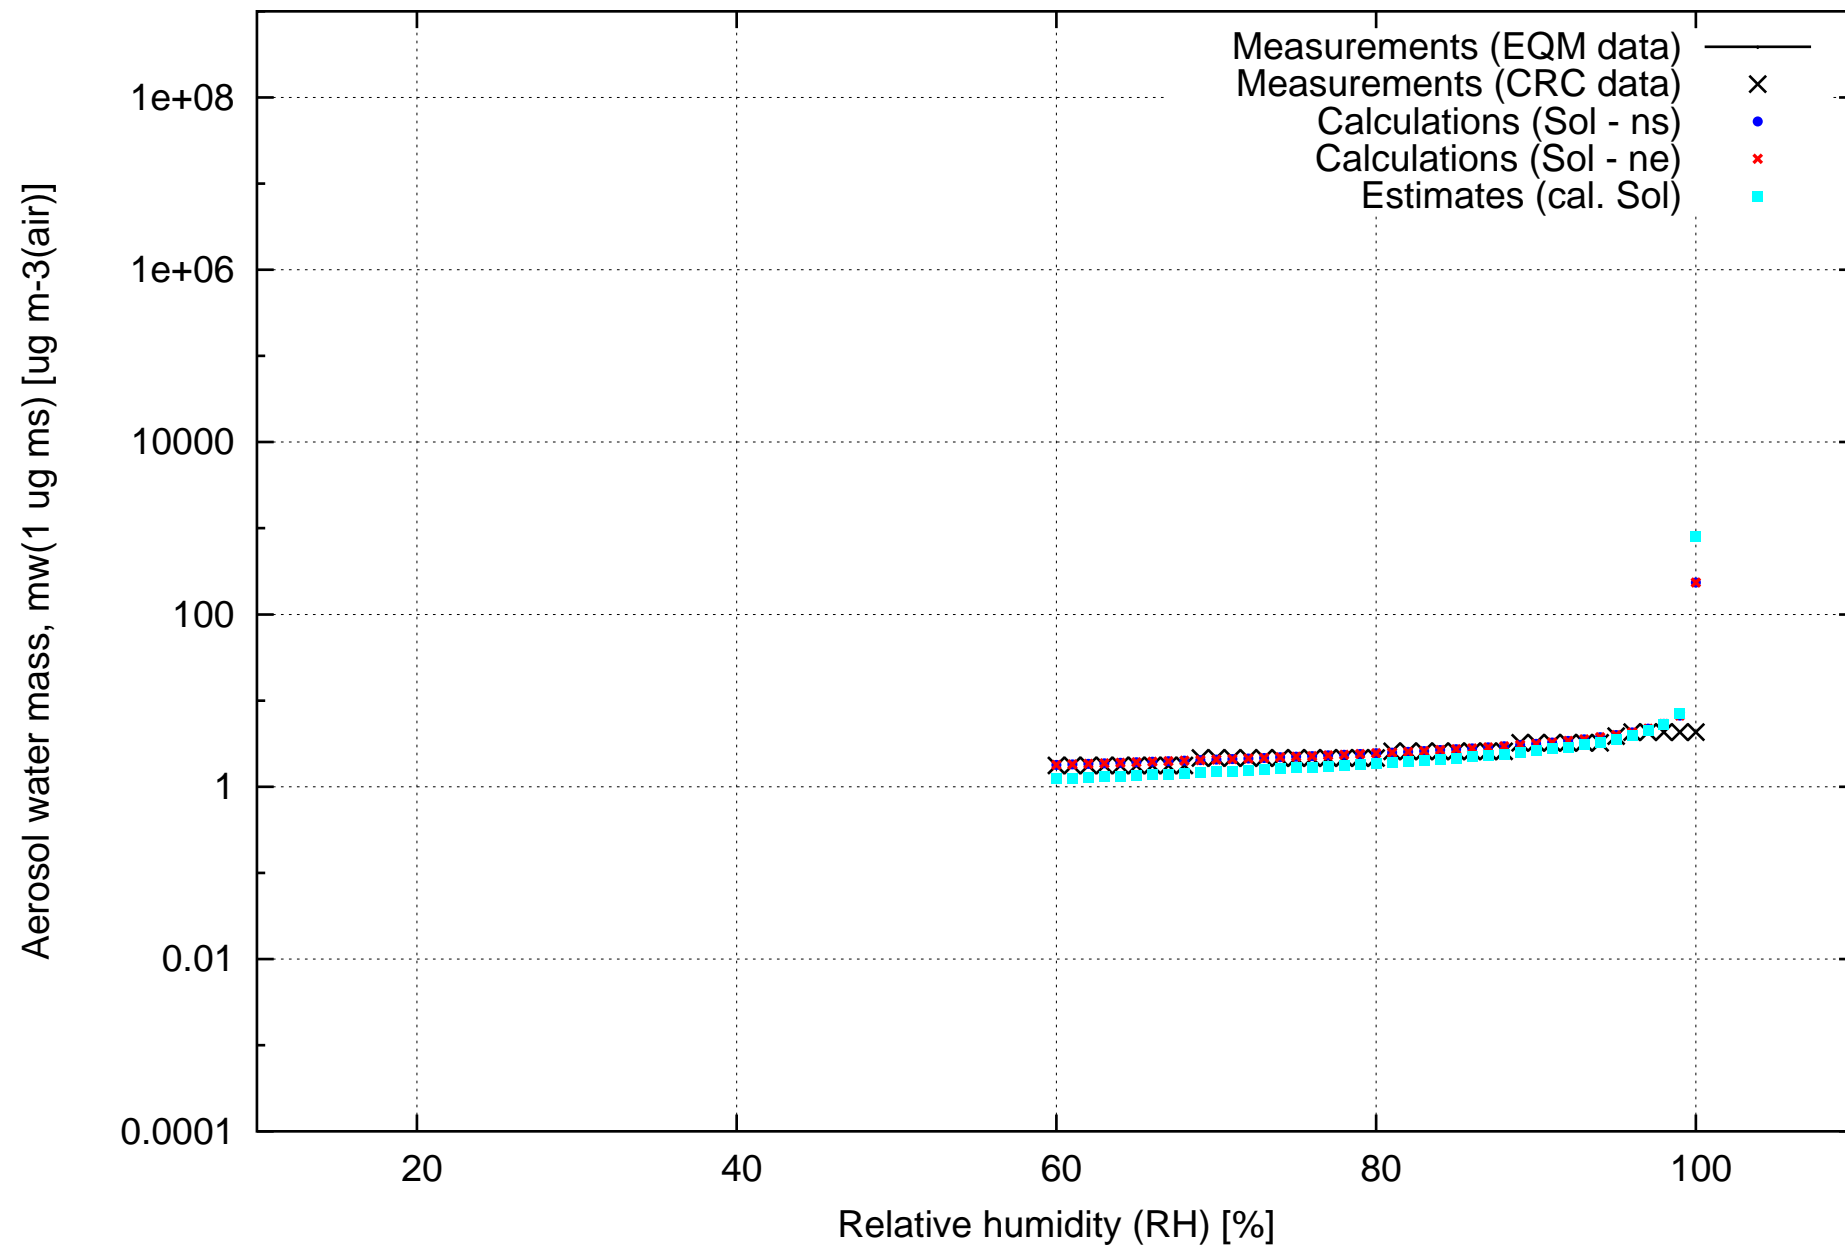

# Potassium phosphate - K<sub>3</sub>PO<sub>4</sub>

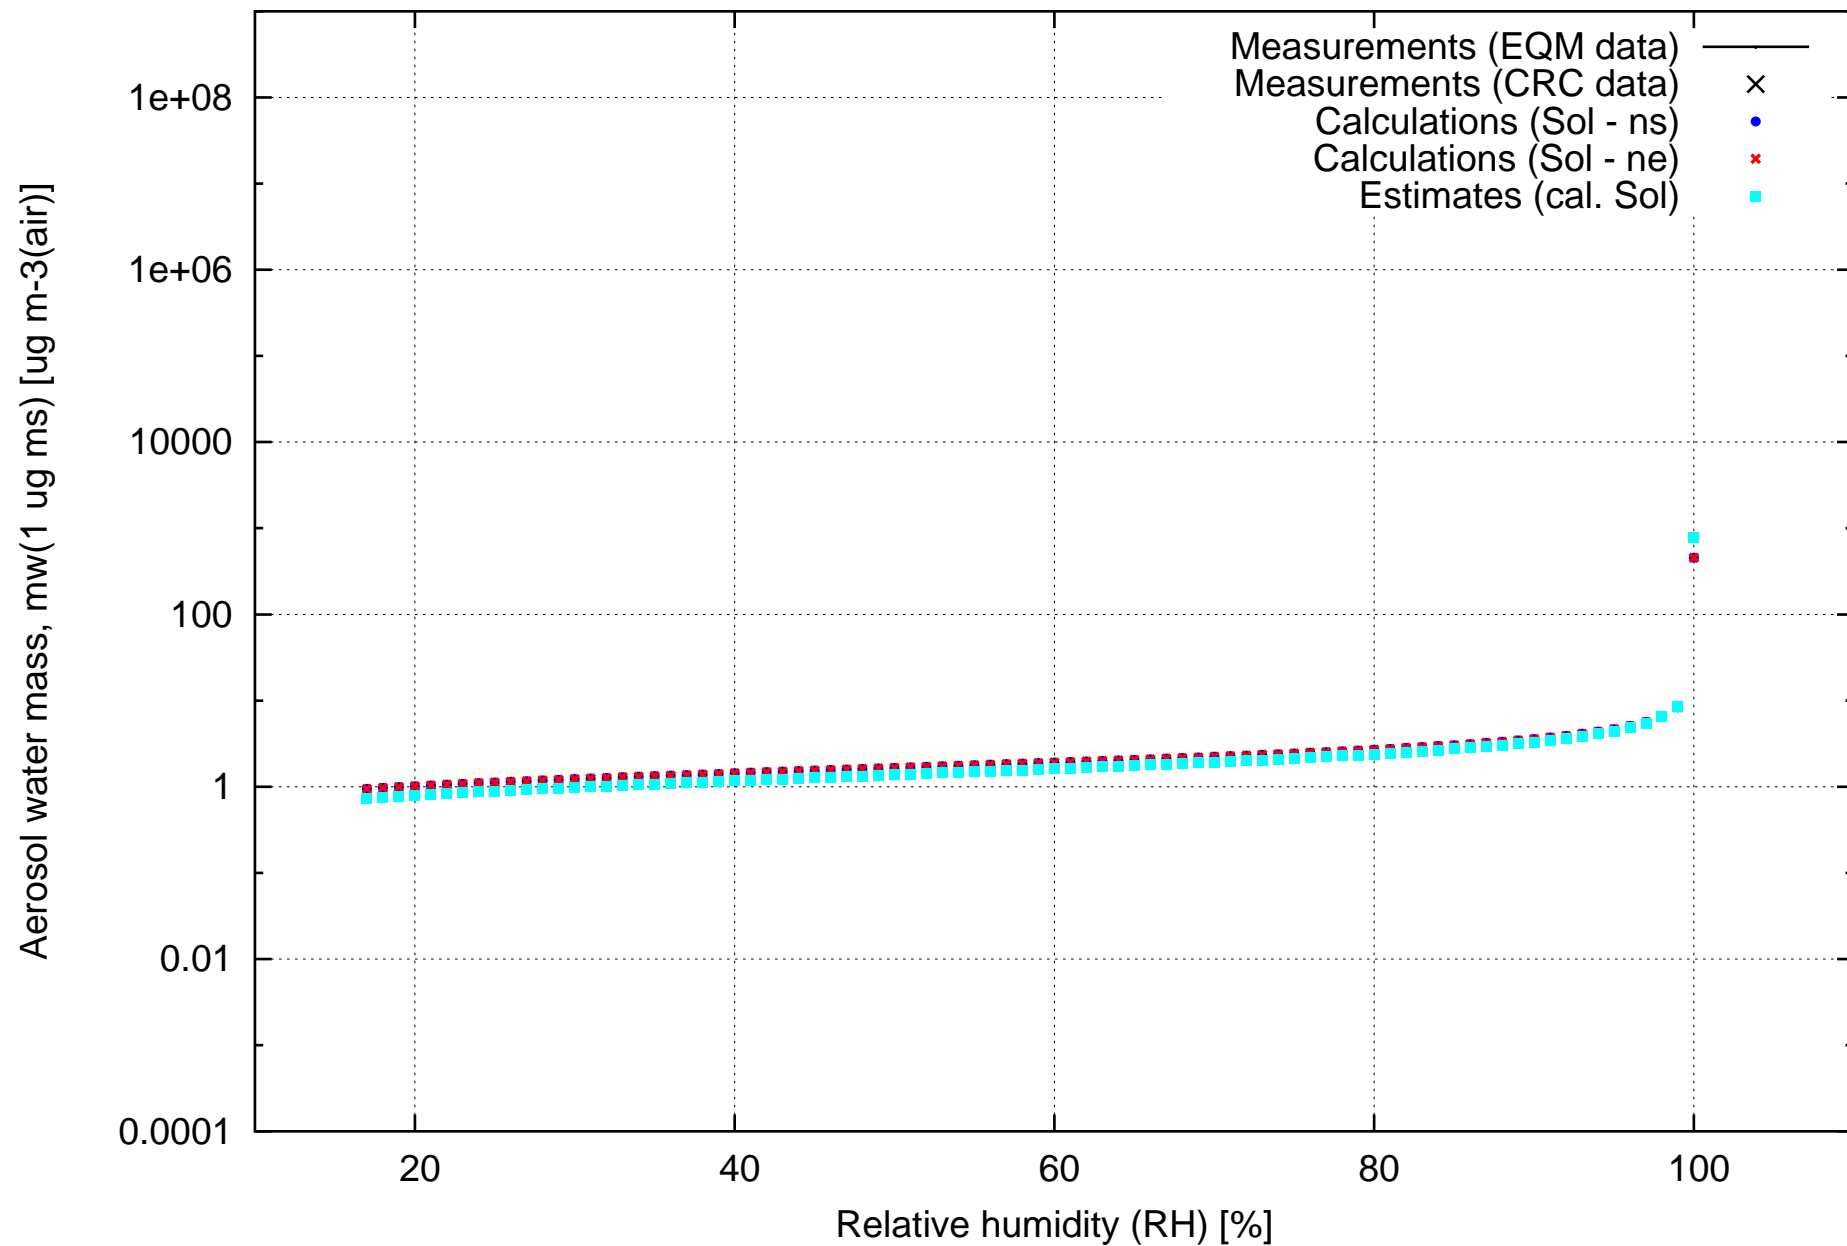

# Potassium sulfate - K<sub>2</sub>SO<sub>4</sub>

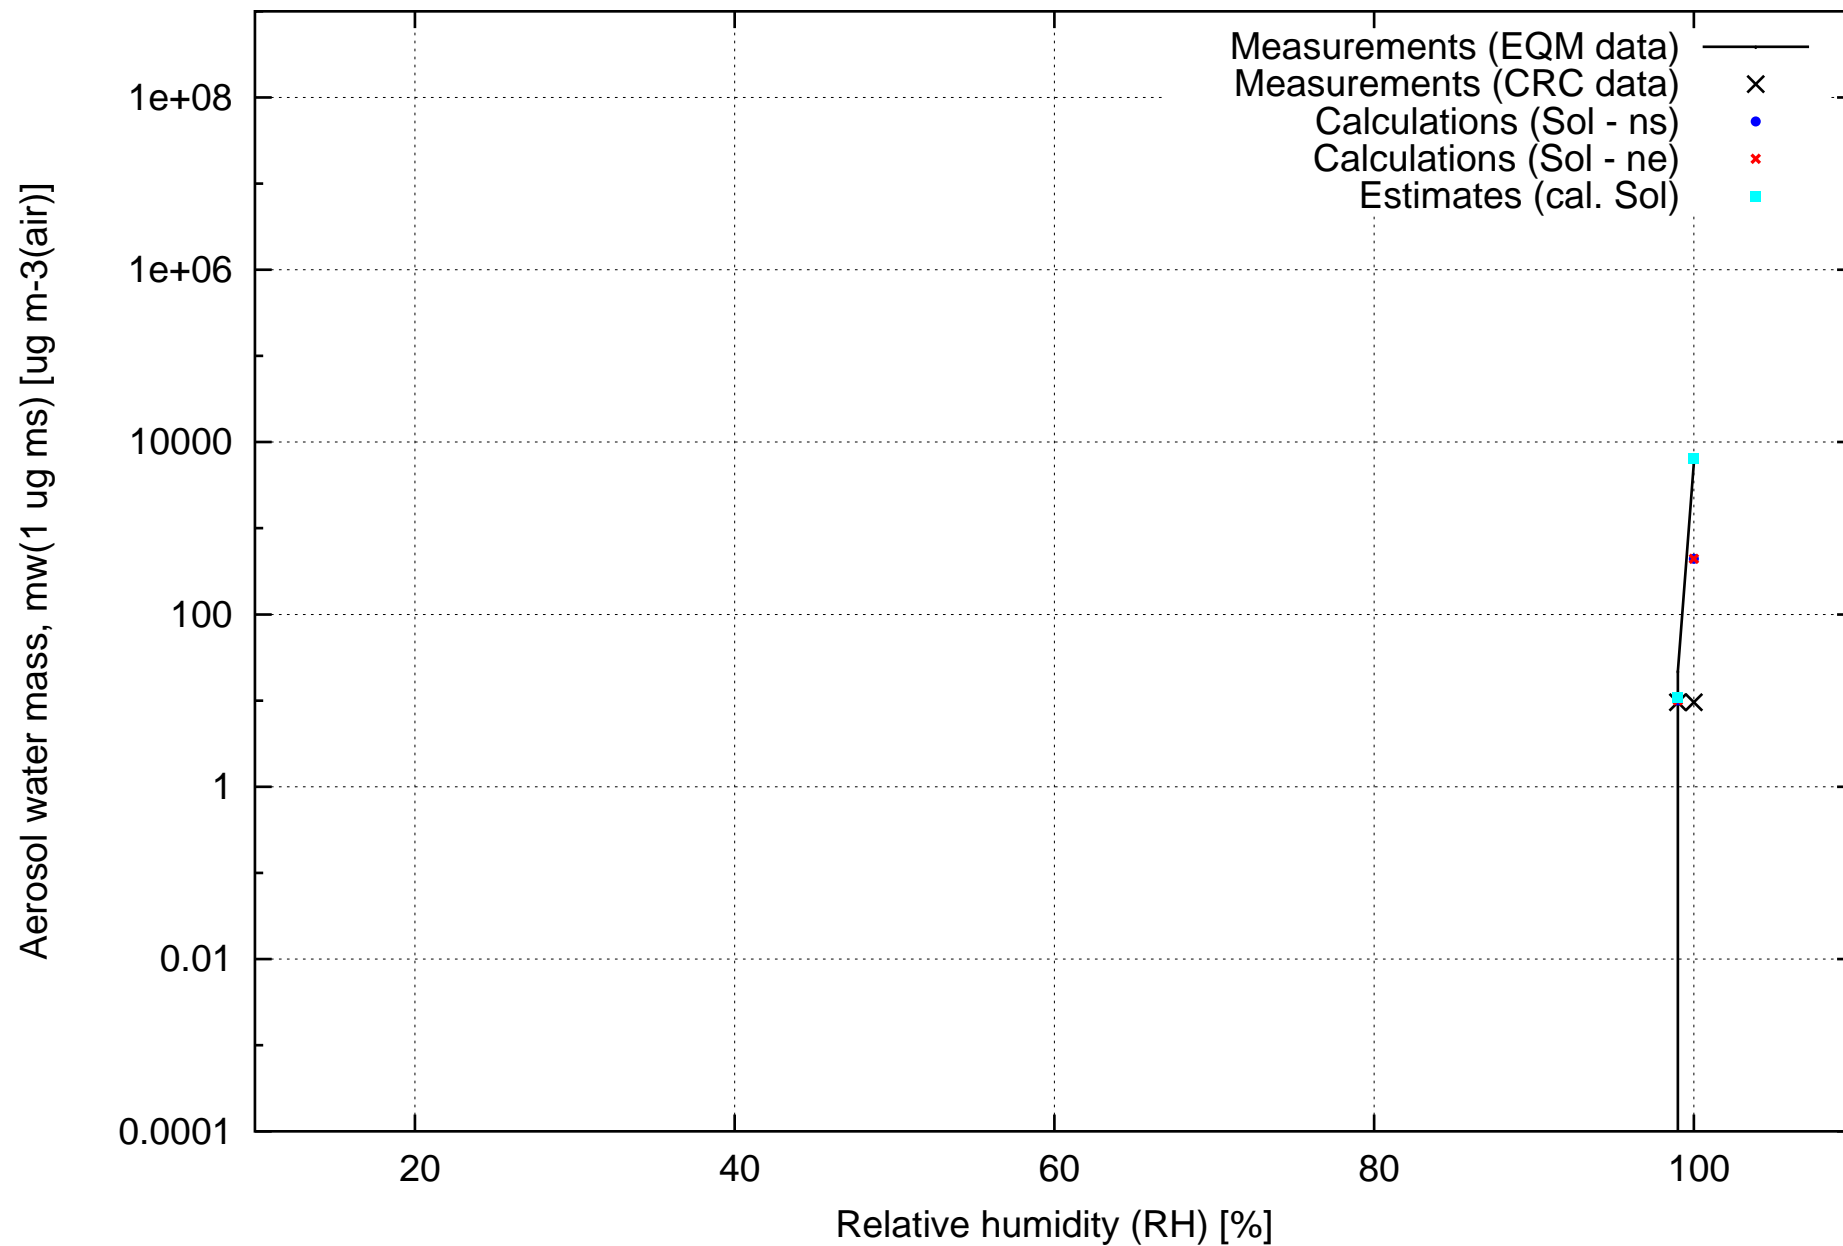

# Potassium hydrogen sulfate - KHSO4

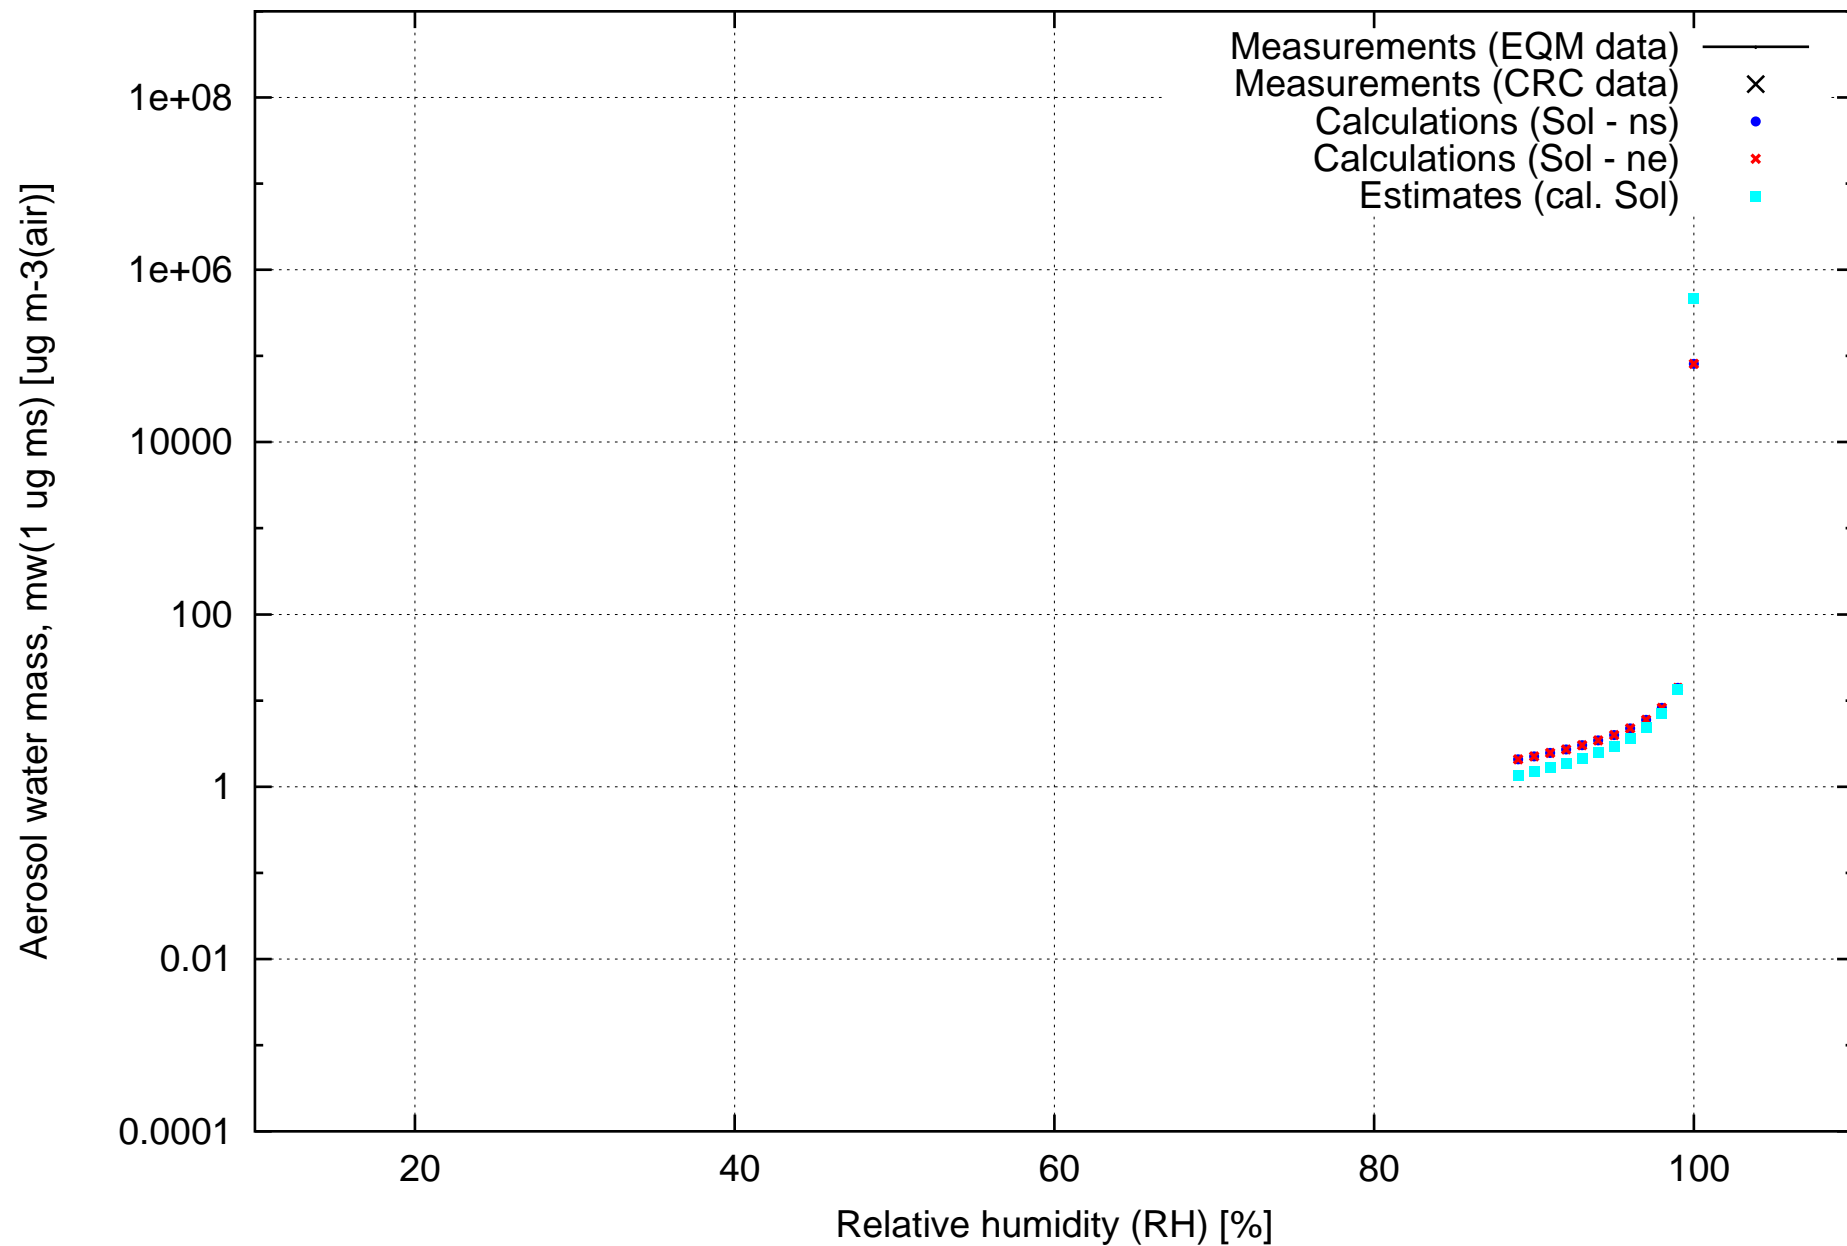

# Potassium nitrate - KNO<sub>3</sub>

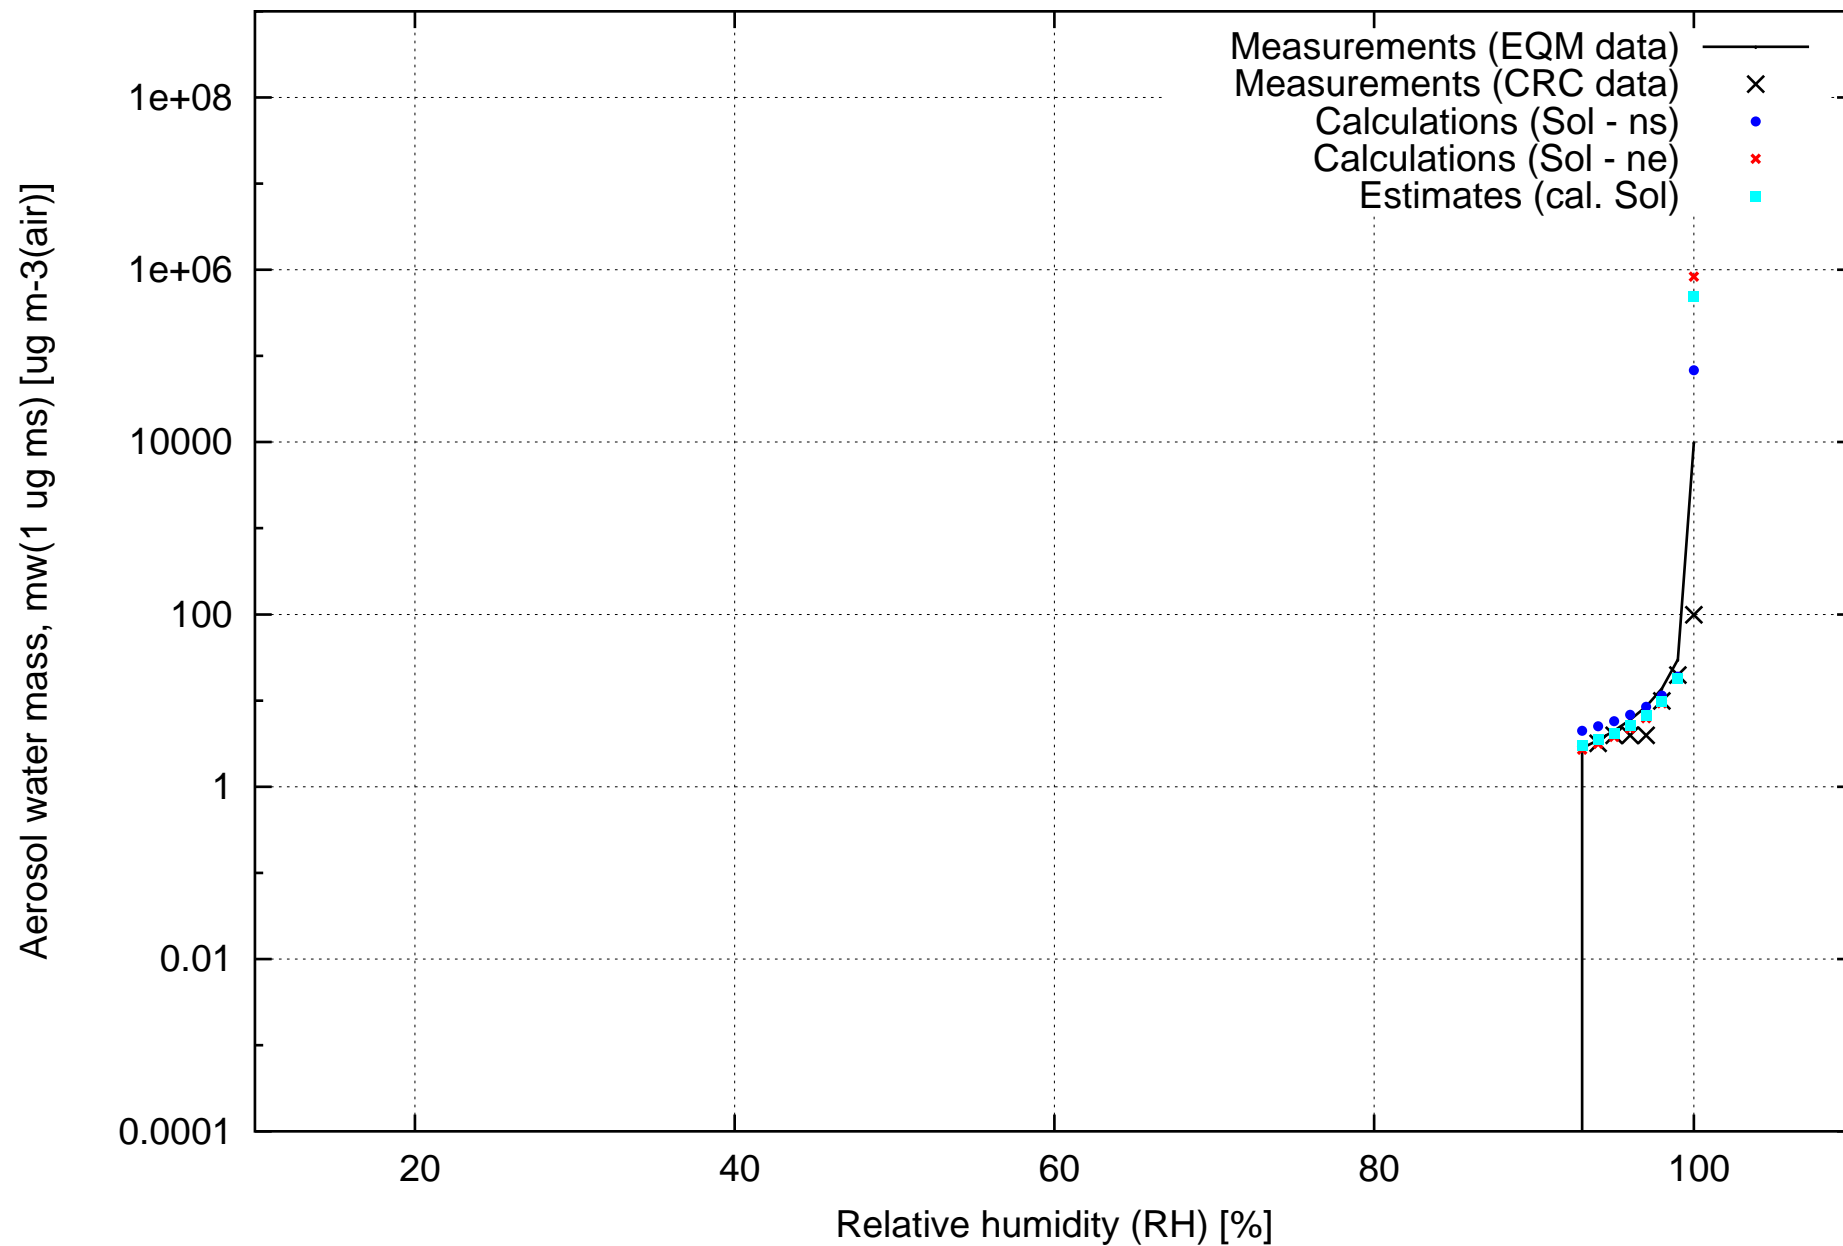

# Potassium chloride - KCl

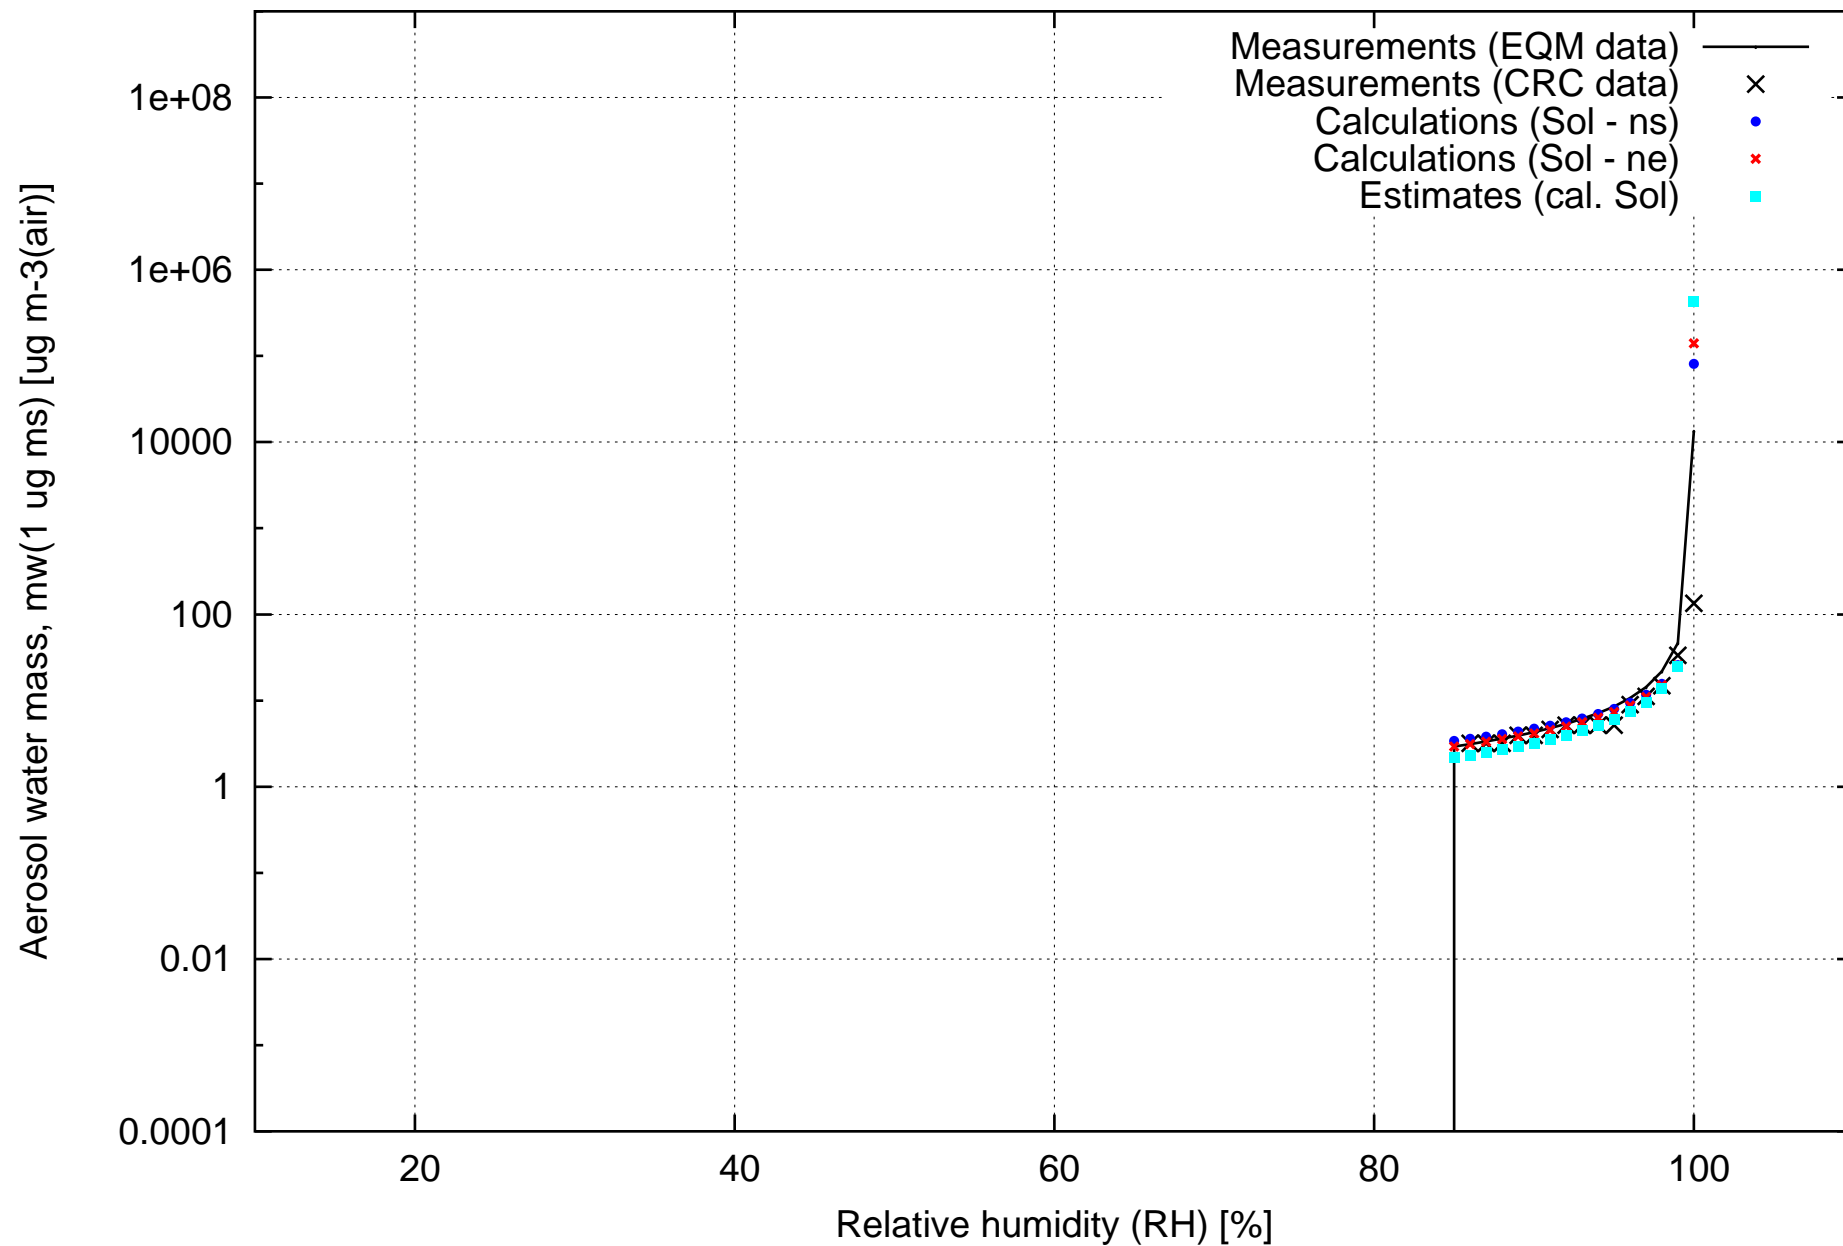

# Potassium bromide - KBr

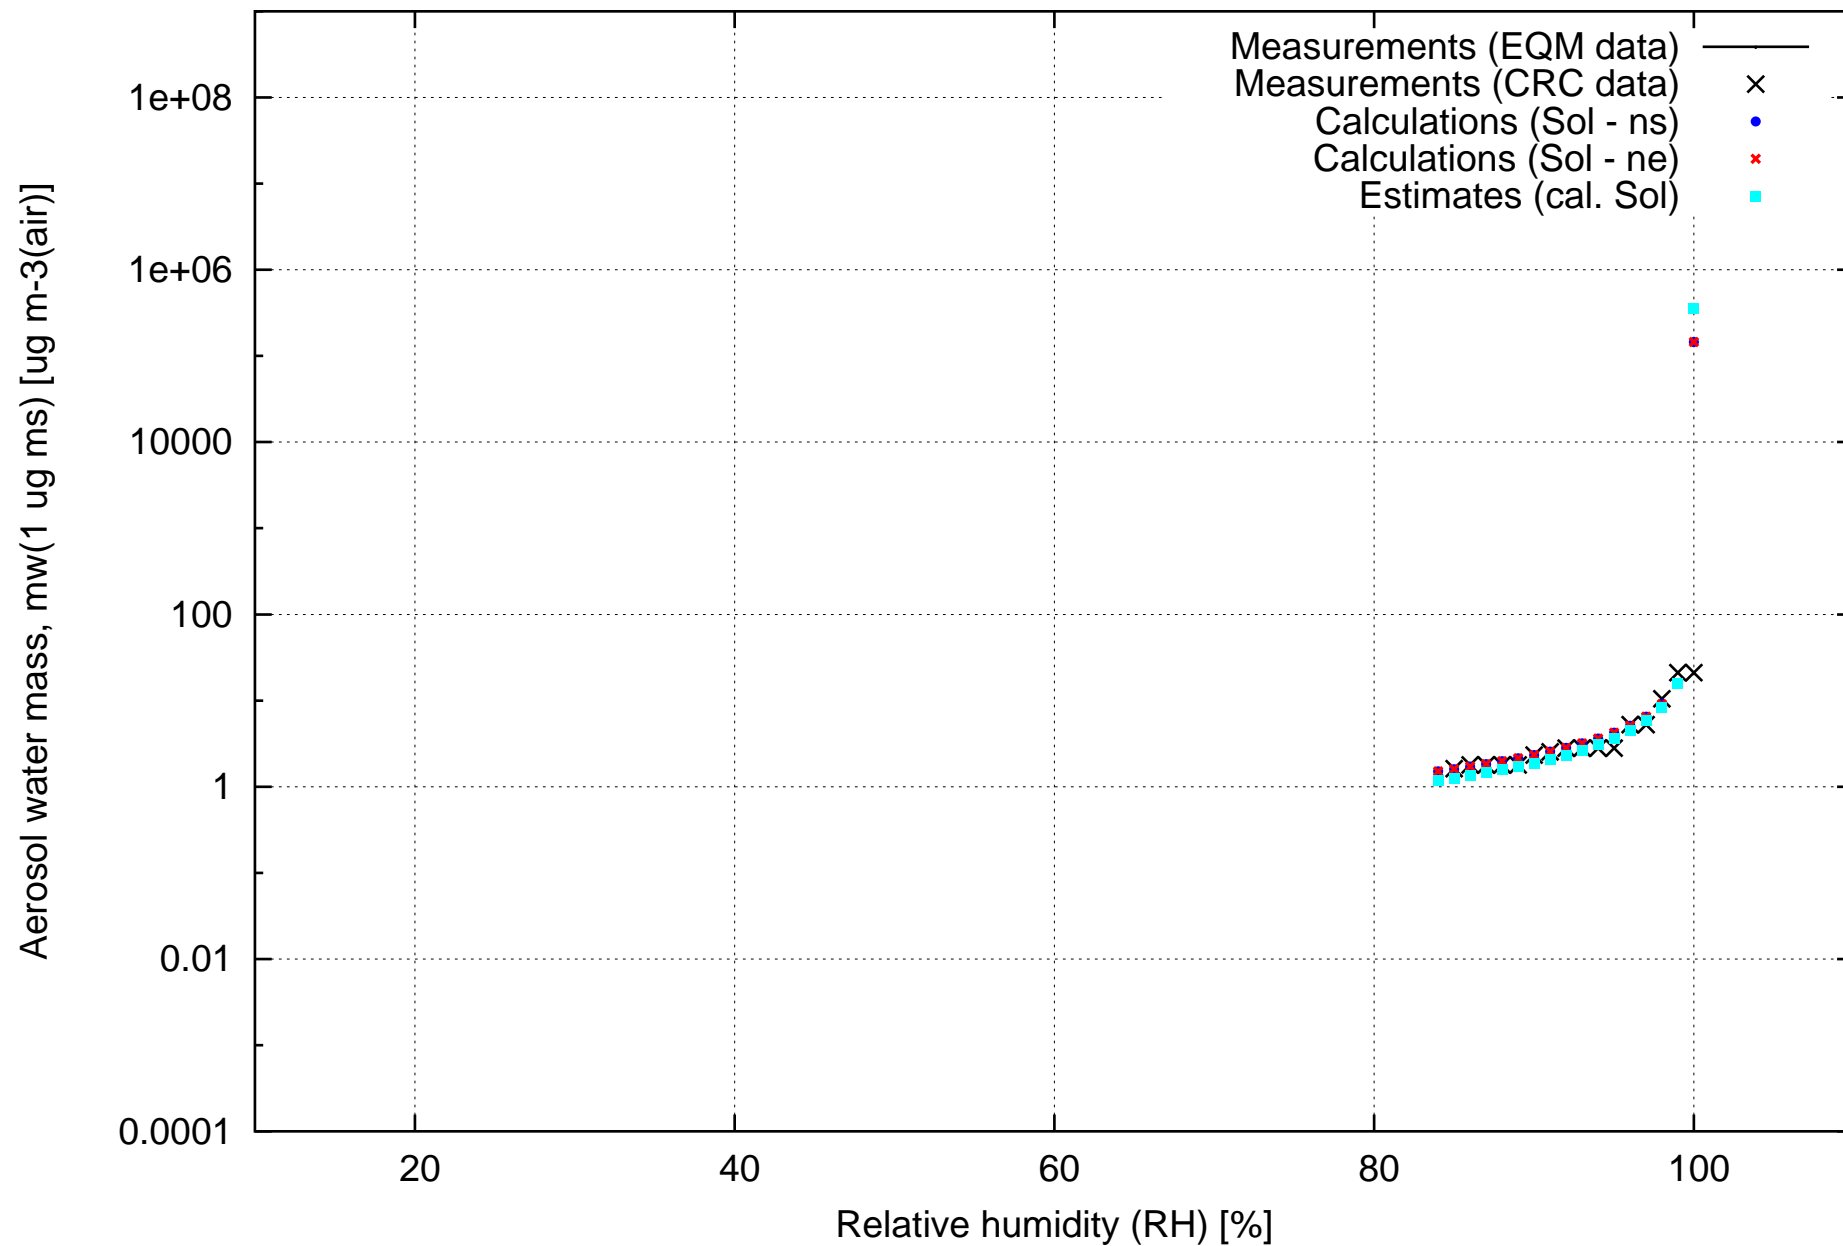



# Potassium iodide - KI

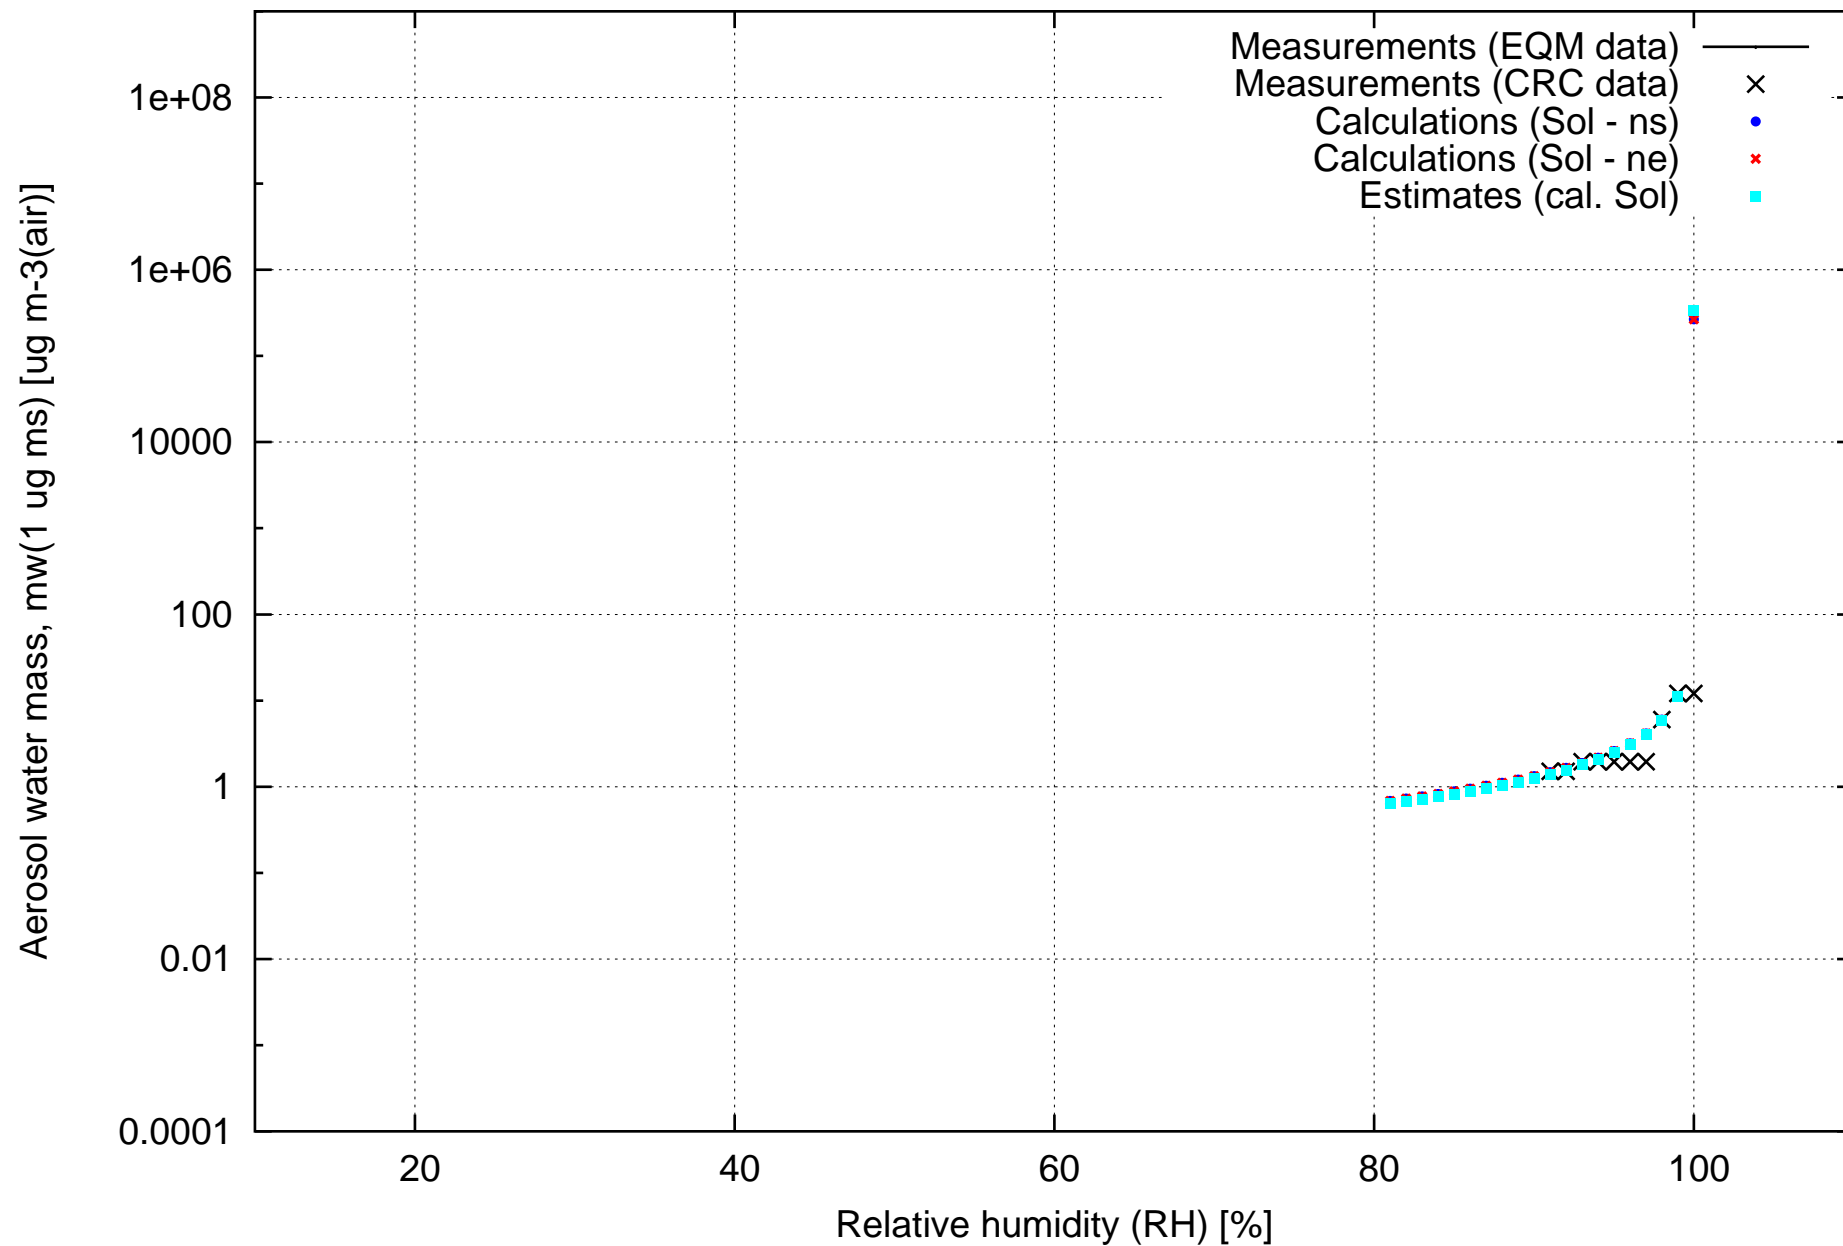

# Potassium carbonate - K<sub>2</sub>CO<sub>3</sub>

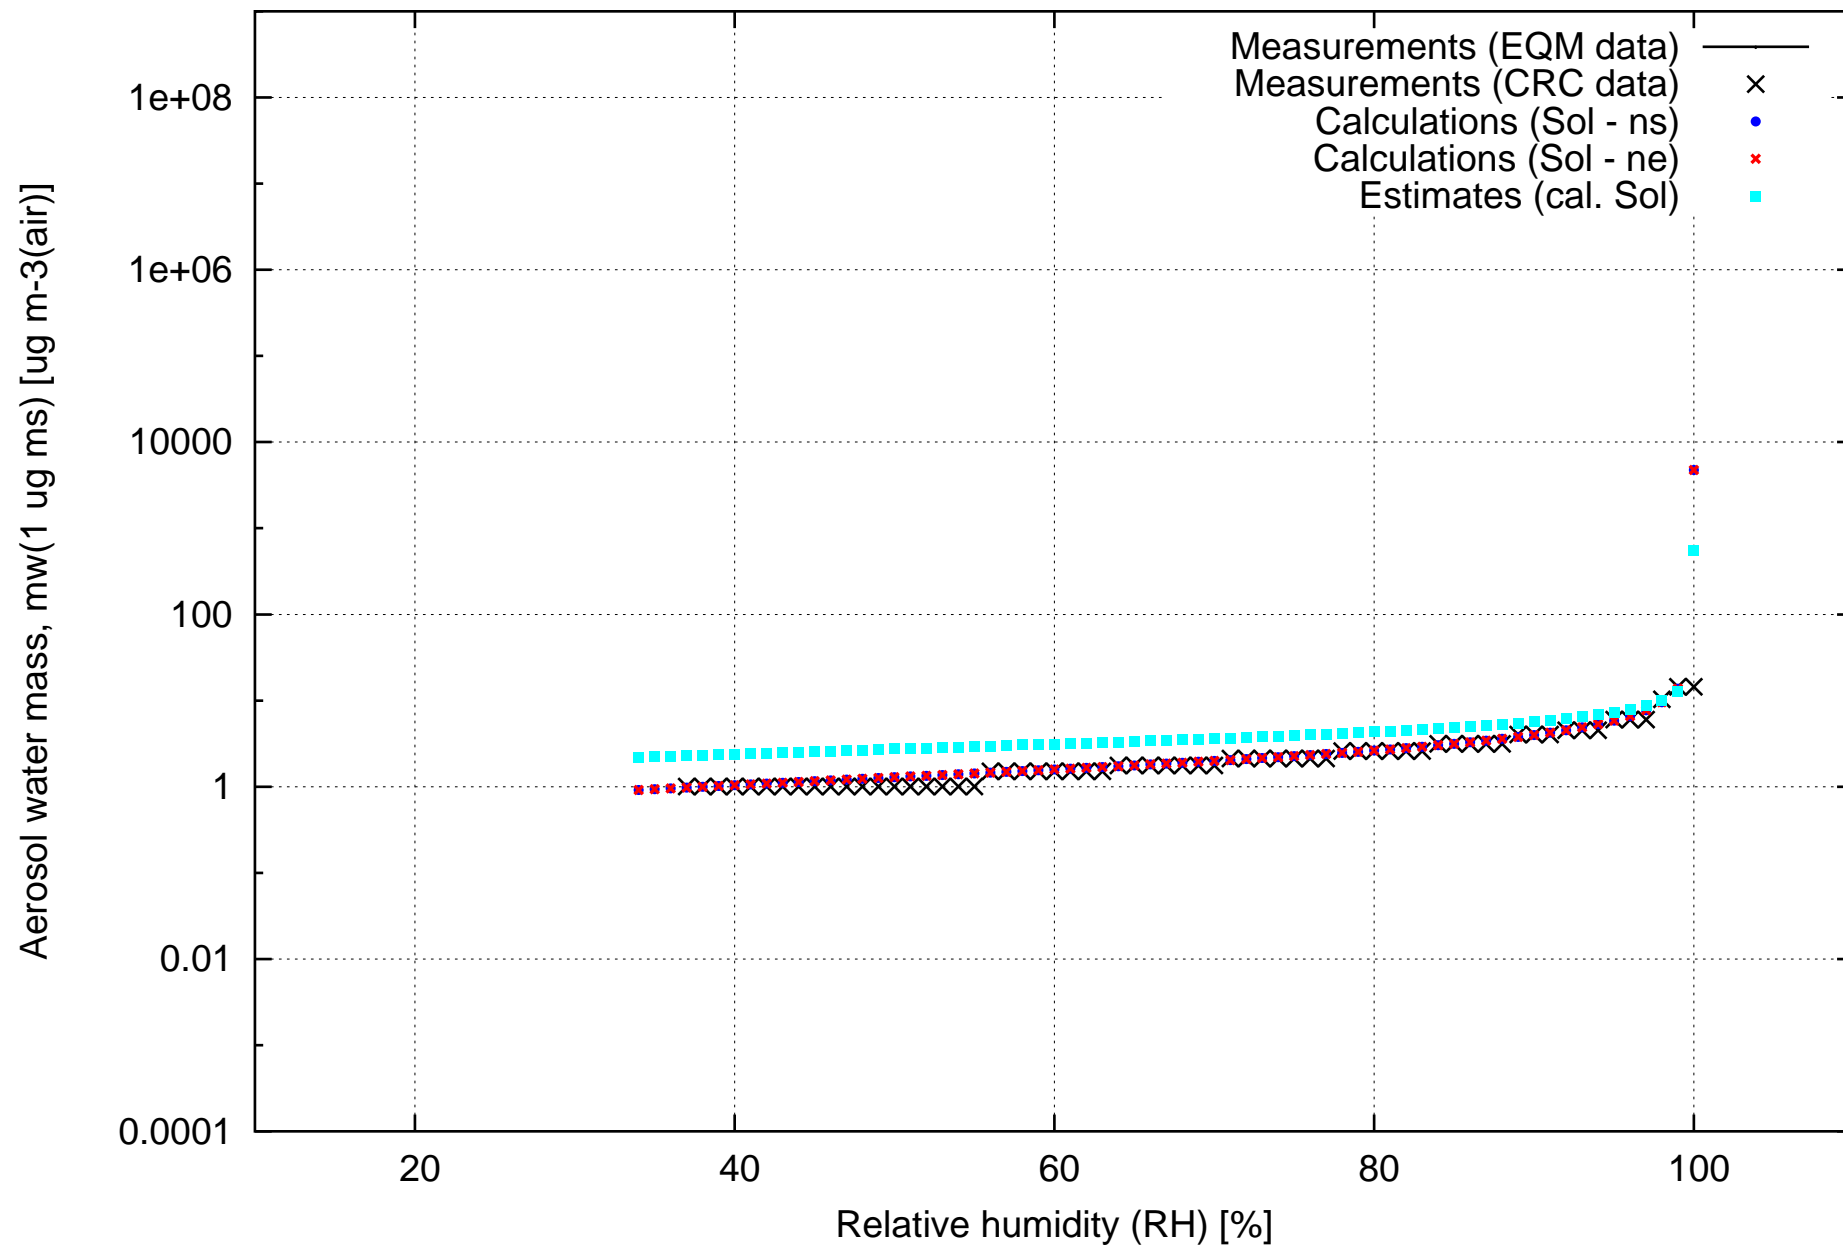

# Potassium hydrogen carbonate - KHCO<sub>3</sub>

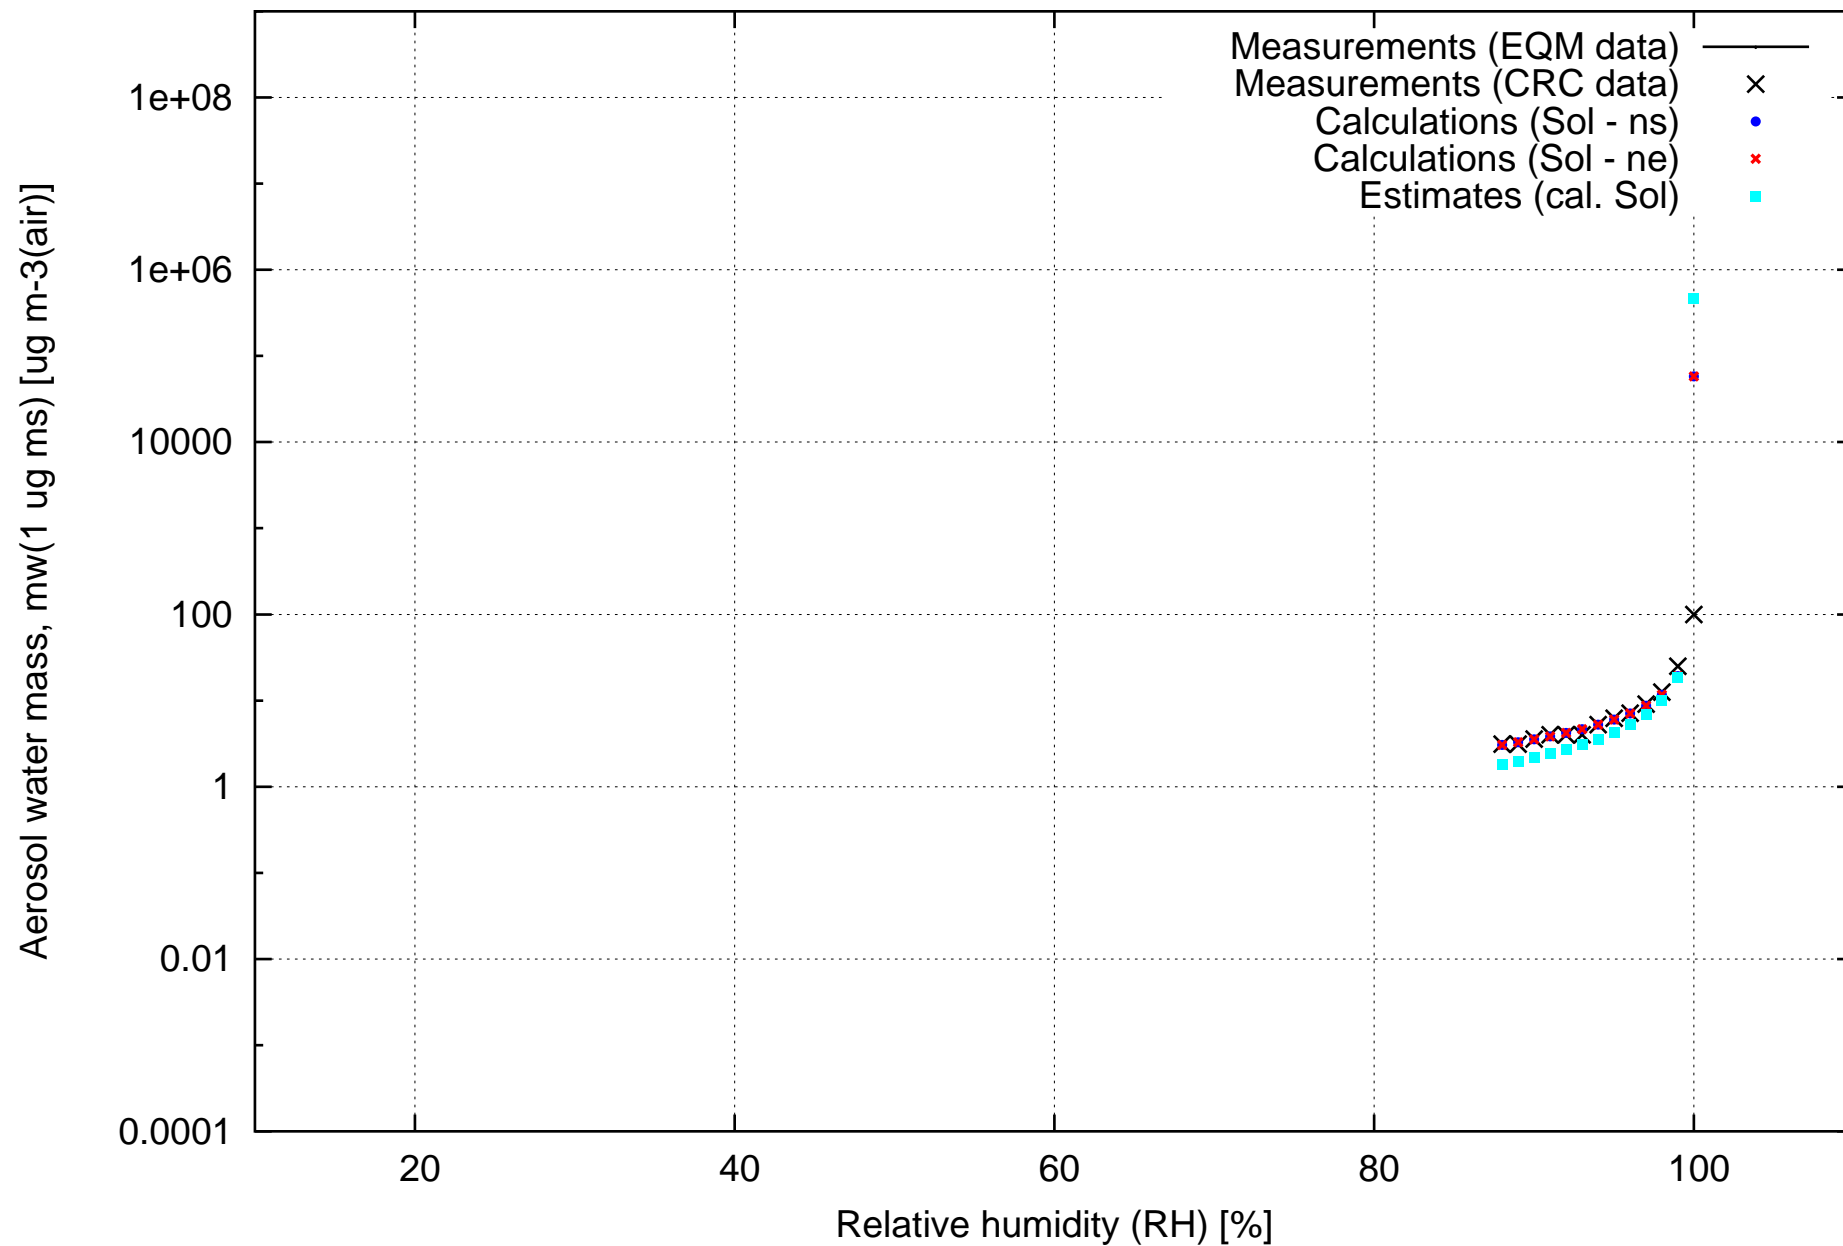

# Potassium hydroxide - KOH

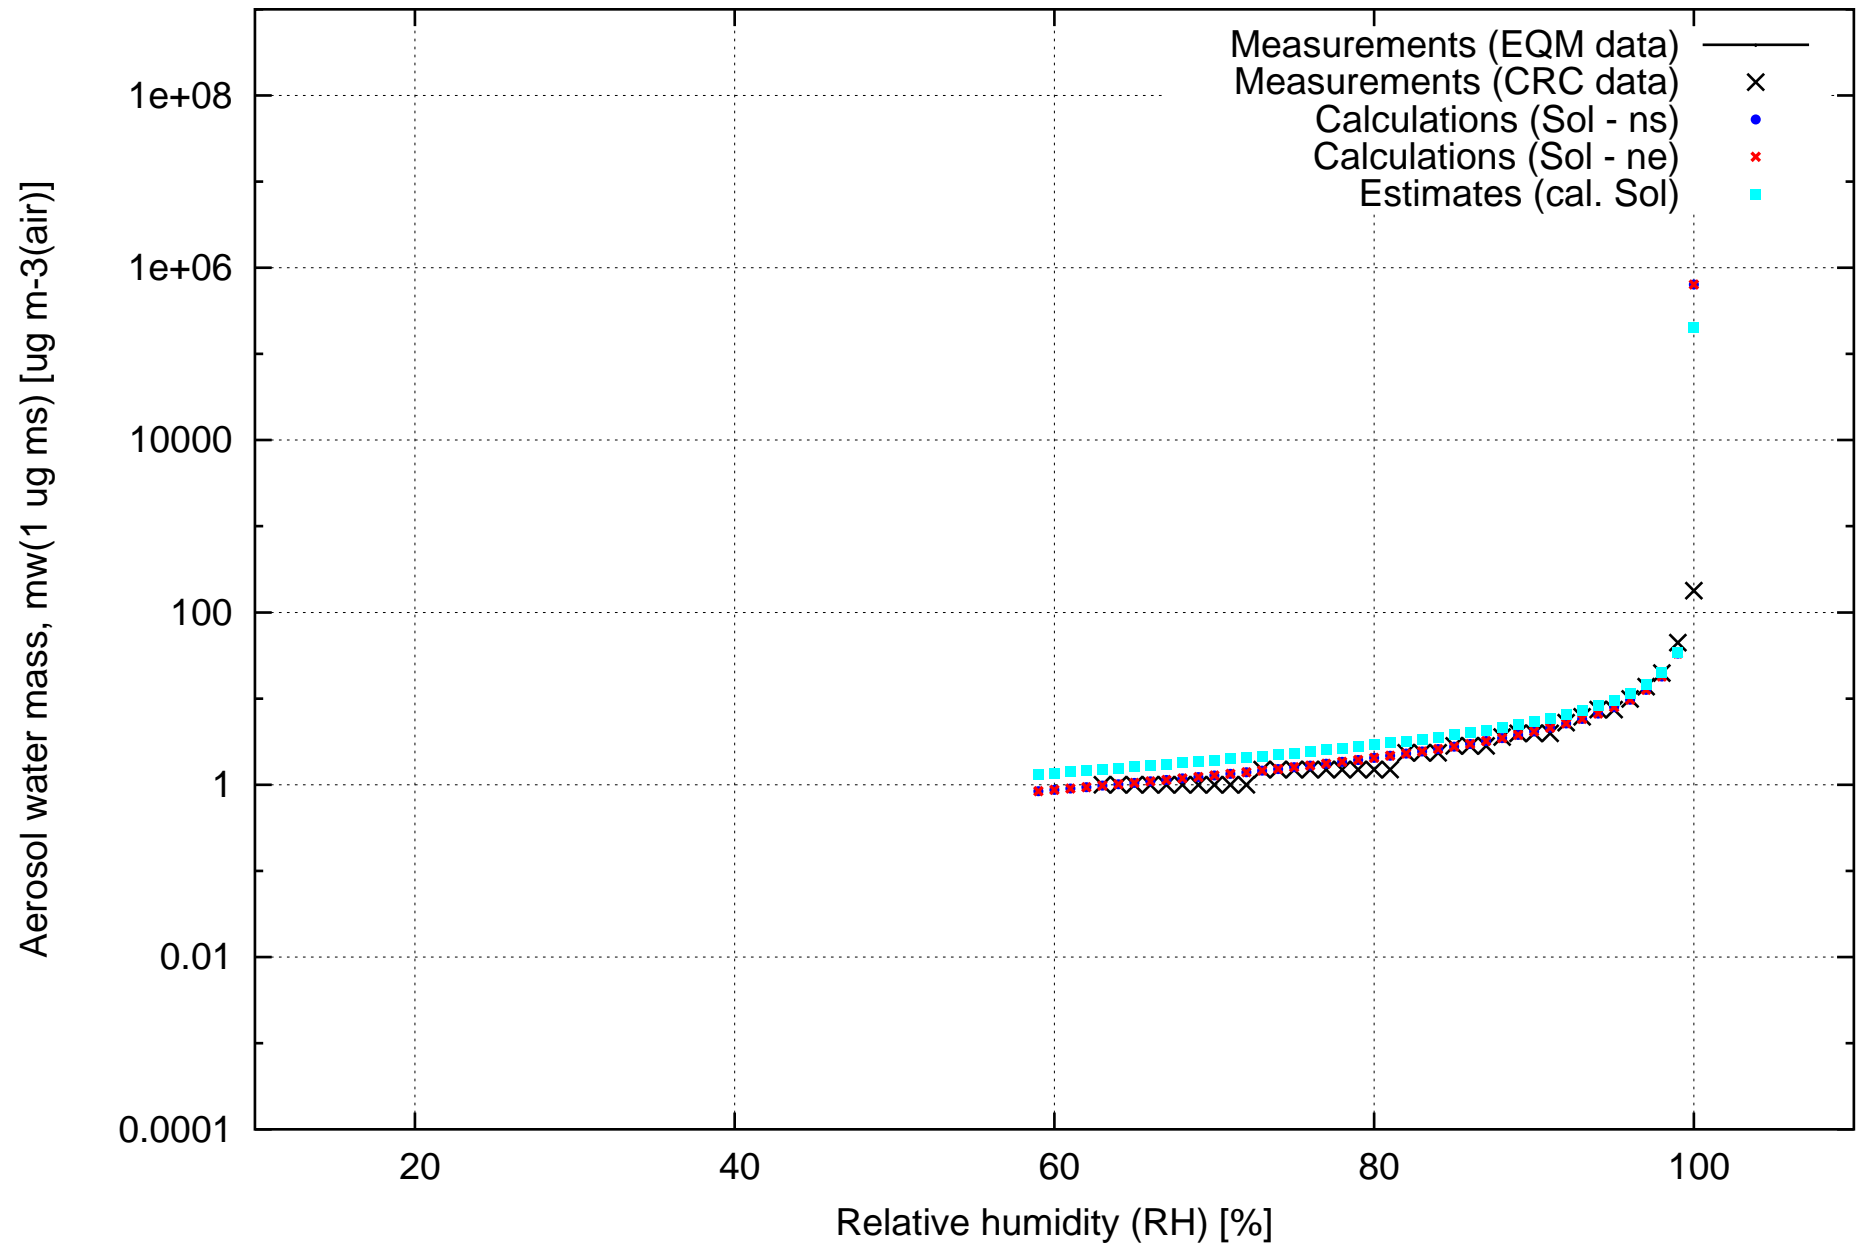

Potassium formate -  $\text{KCHO}_2 = \text{H}(\text{COOK})$

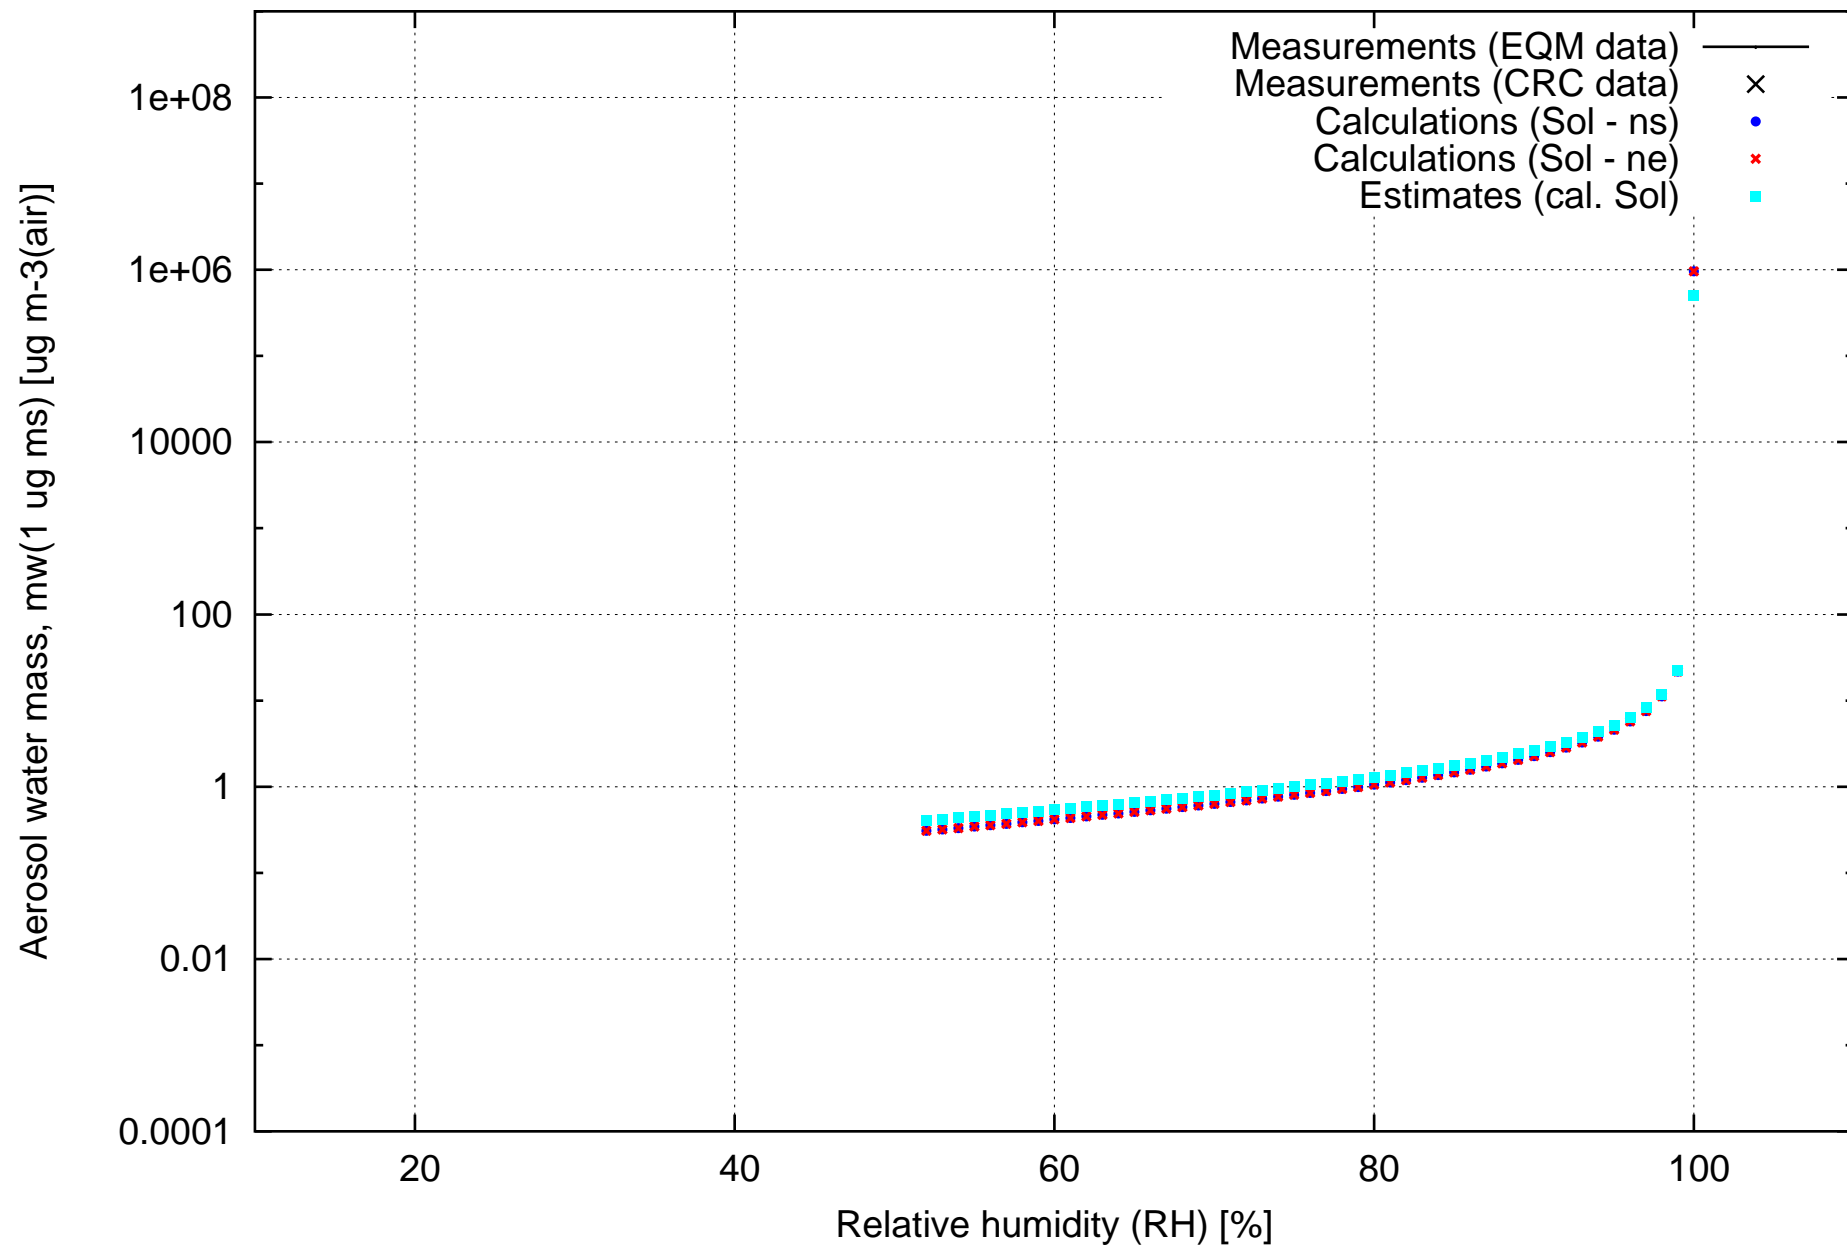

Potassium acetate -  $\text{KC}_2\text{H}_3\text{O}_2 = \text{CH}_3(\text{COOK})$

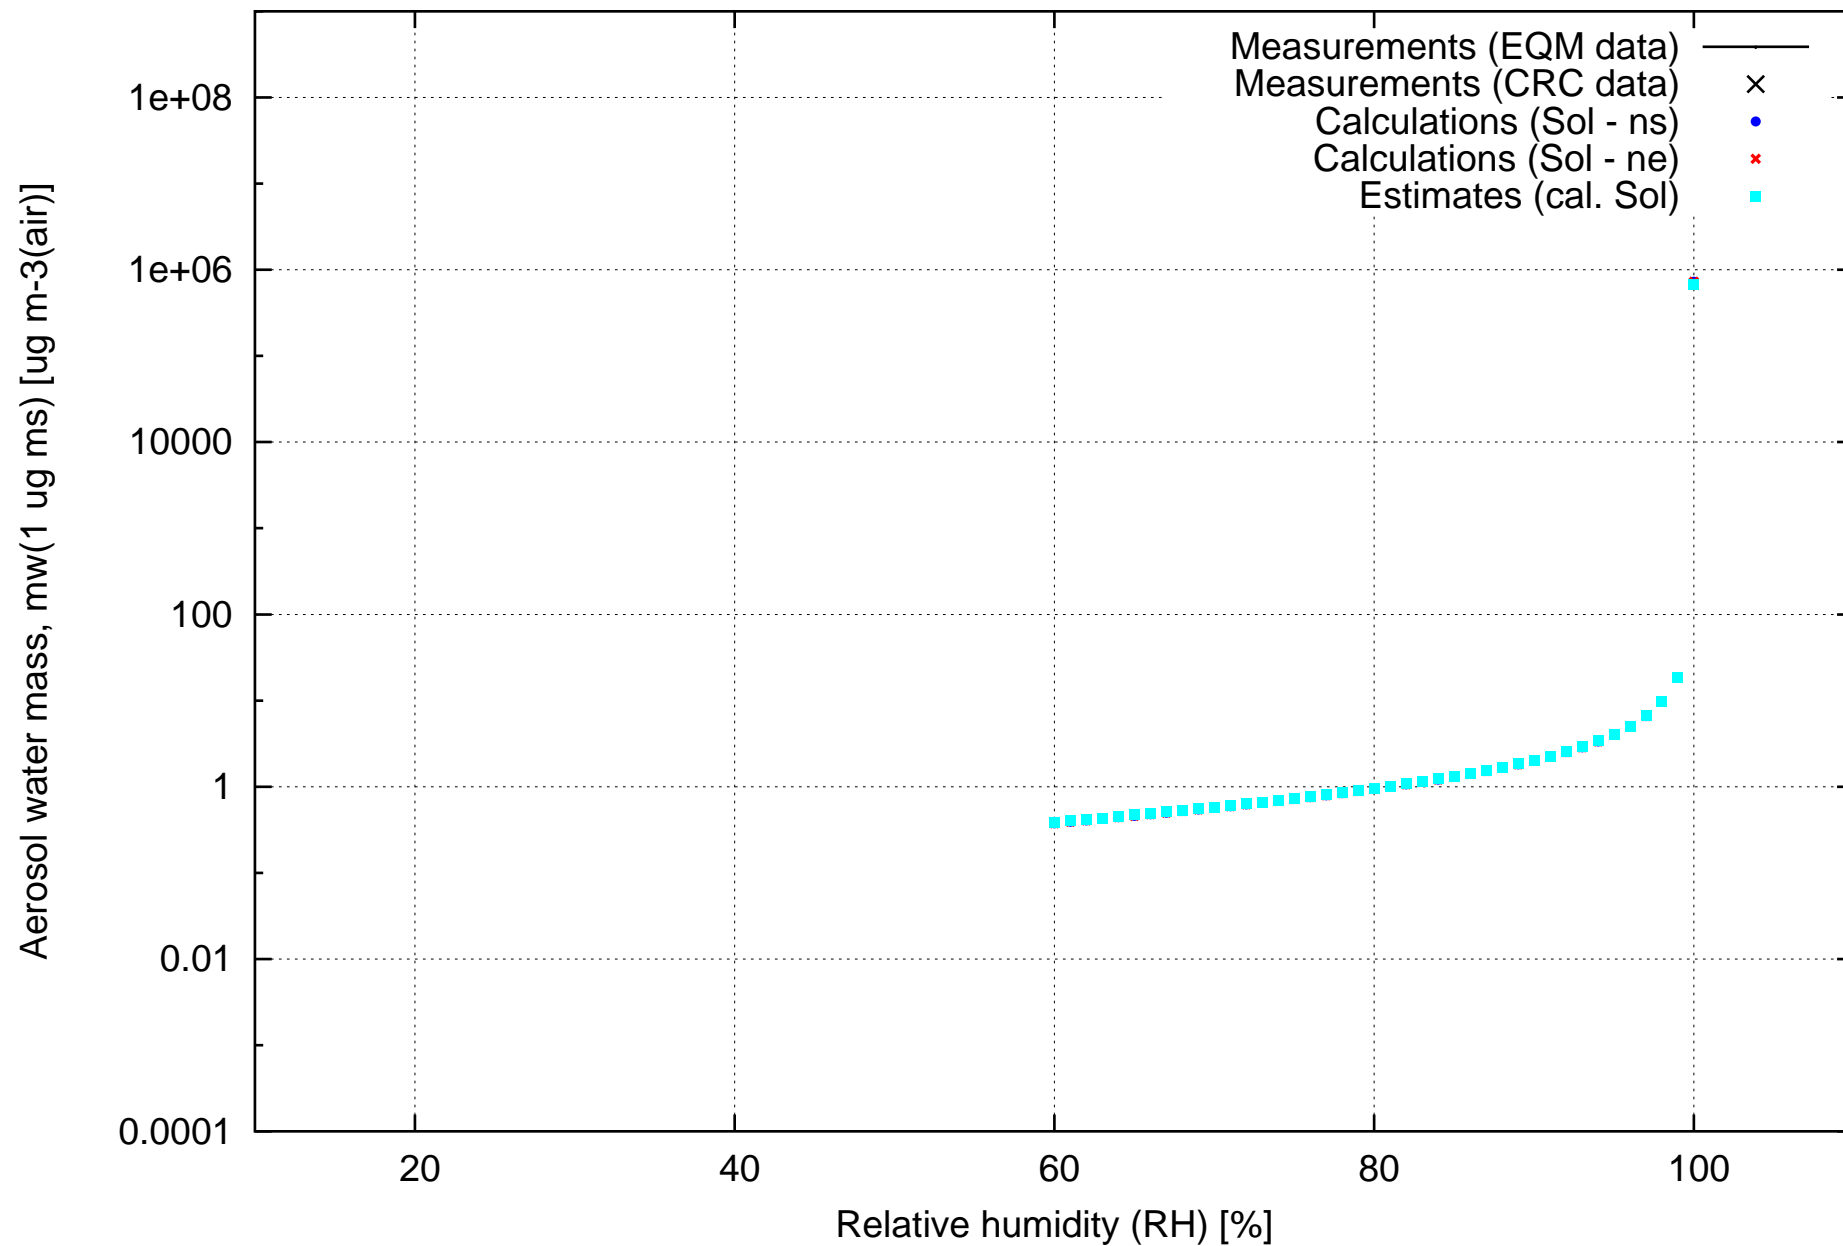

Potassium oxalate -  $\text{K}_2\text{C}_2\text{O}_4 = (\text{COOK})_2$

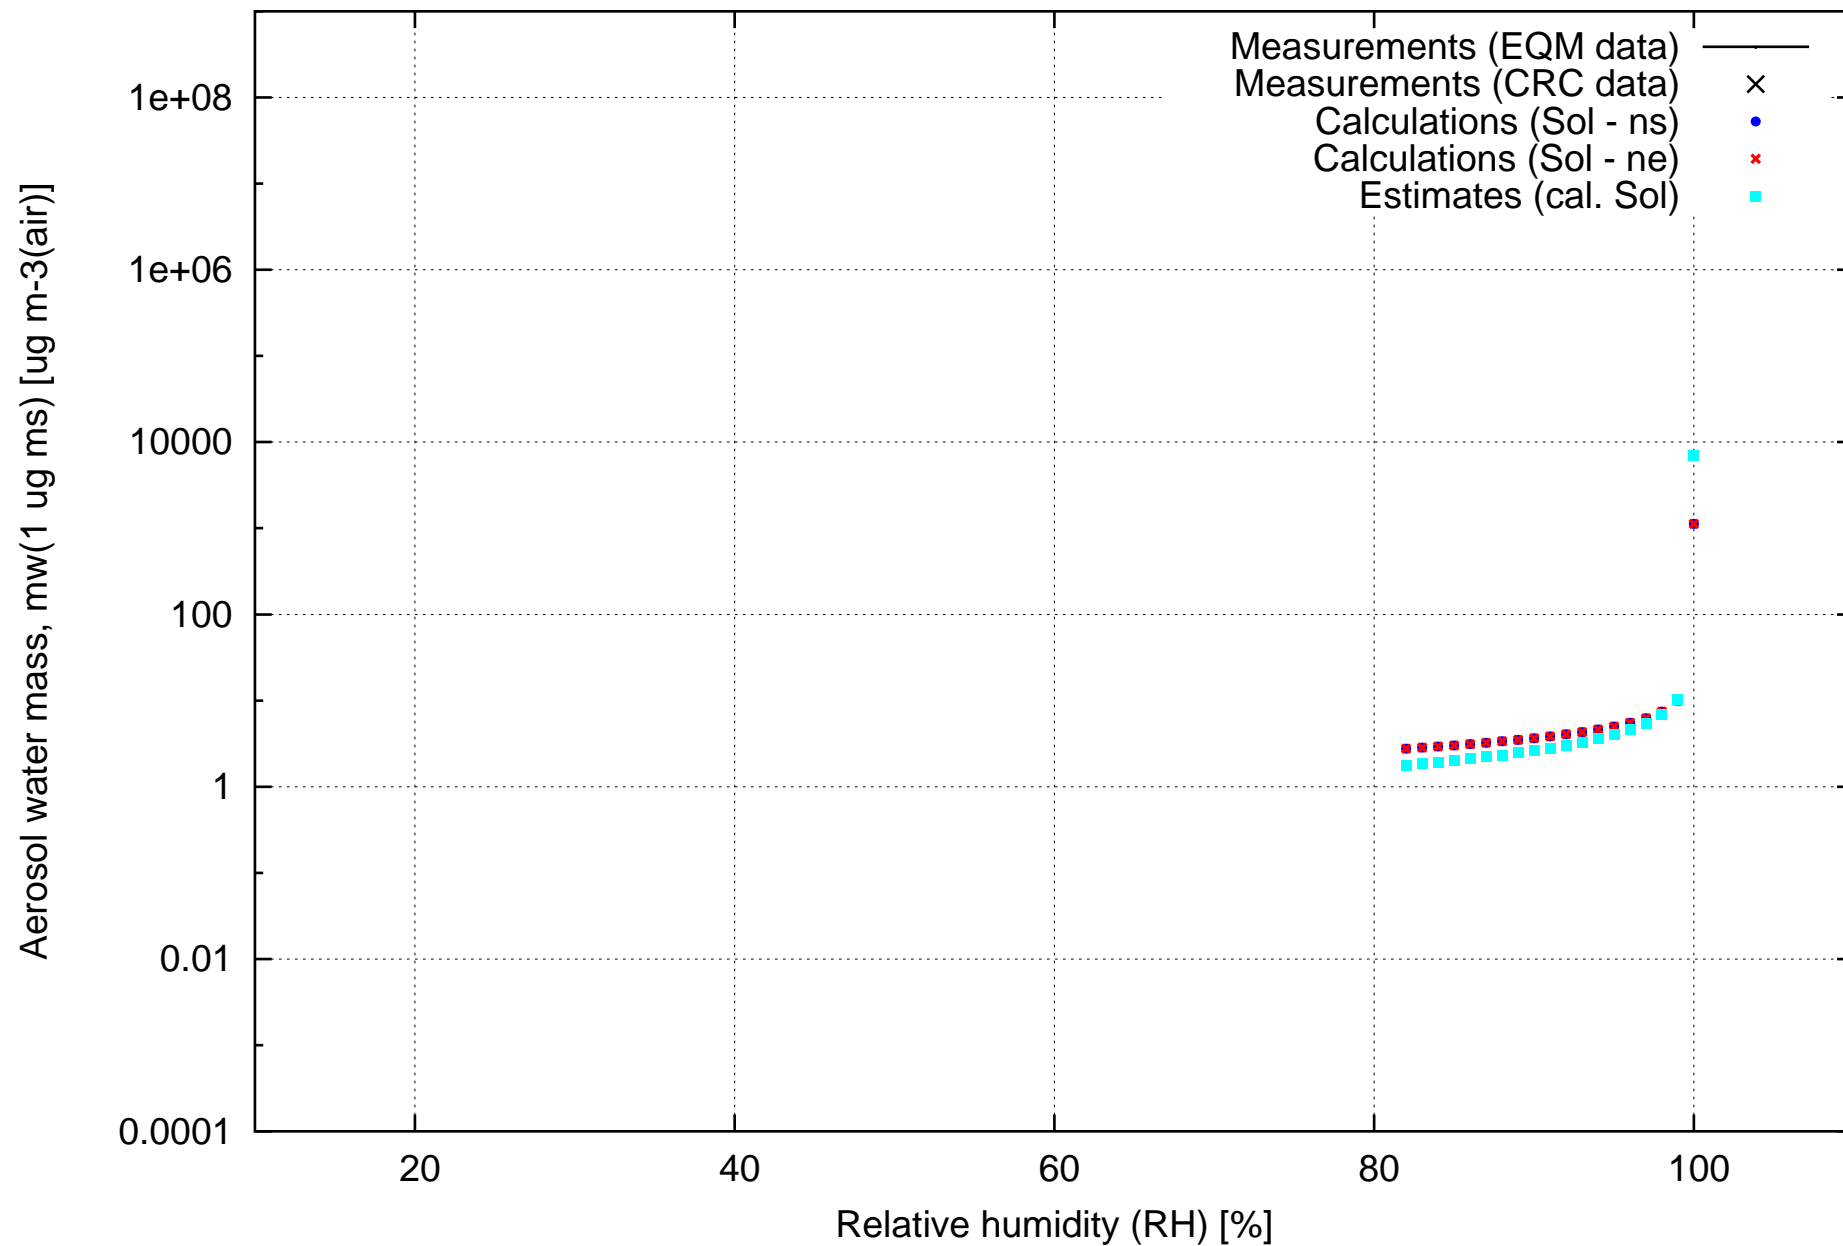

Potassium citrate -  $\text{K}_3\text{C}_6\text{H}_5\text{O}_7 = (\text{HO})\text{C}(\text{COOK})_3$

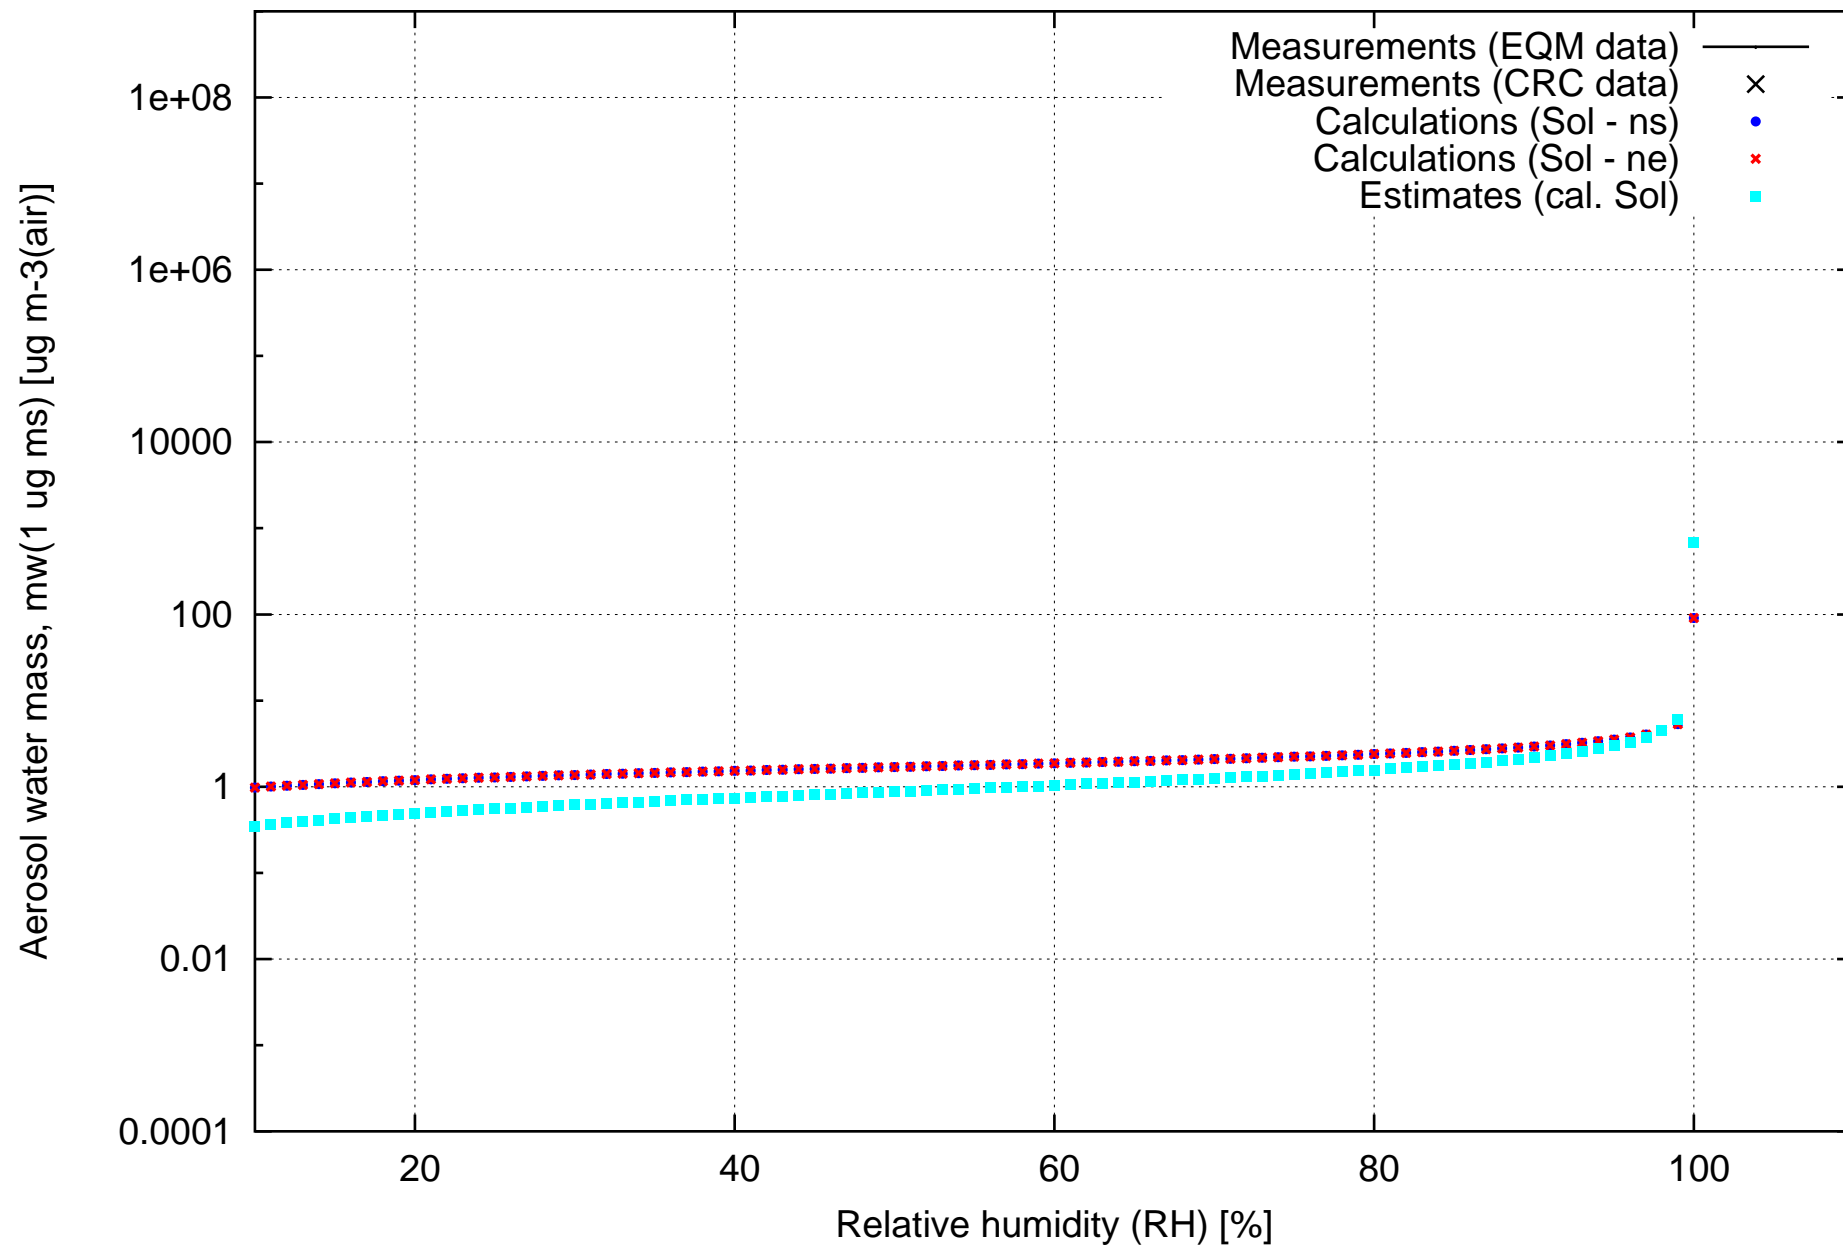



# Calcium phosphate - $\text{Ca}_3(\text{PO}_4)_2$

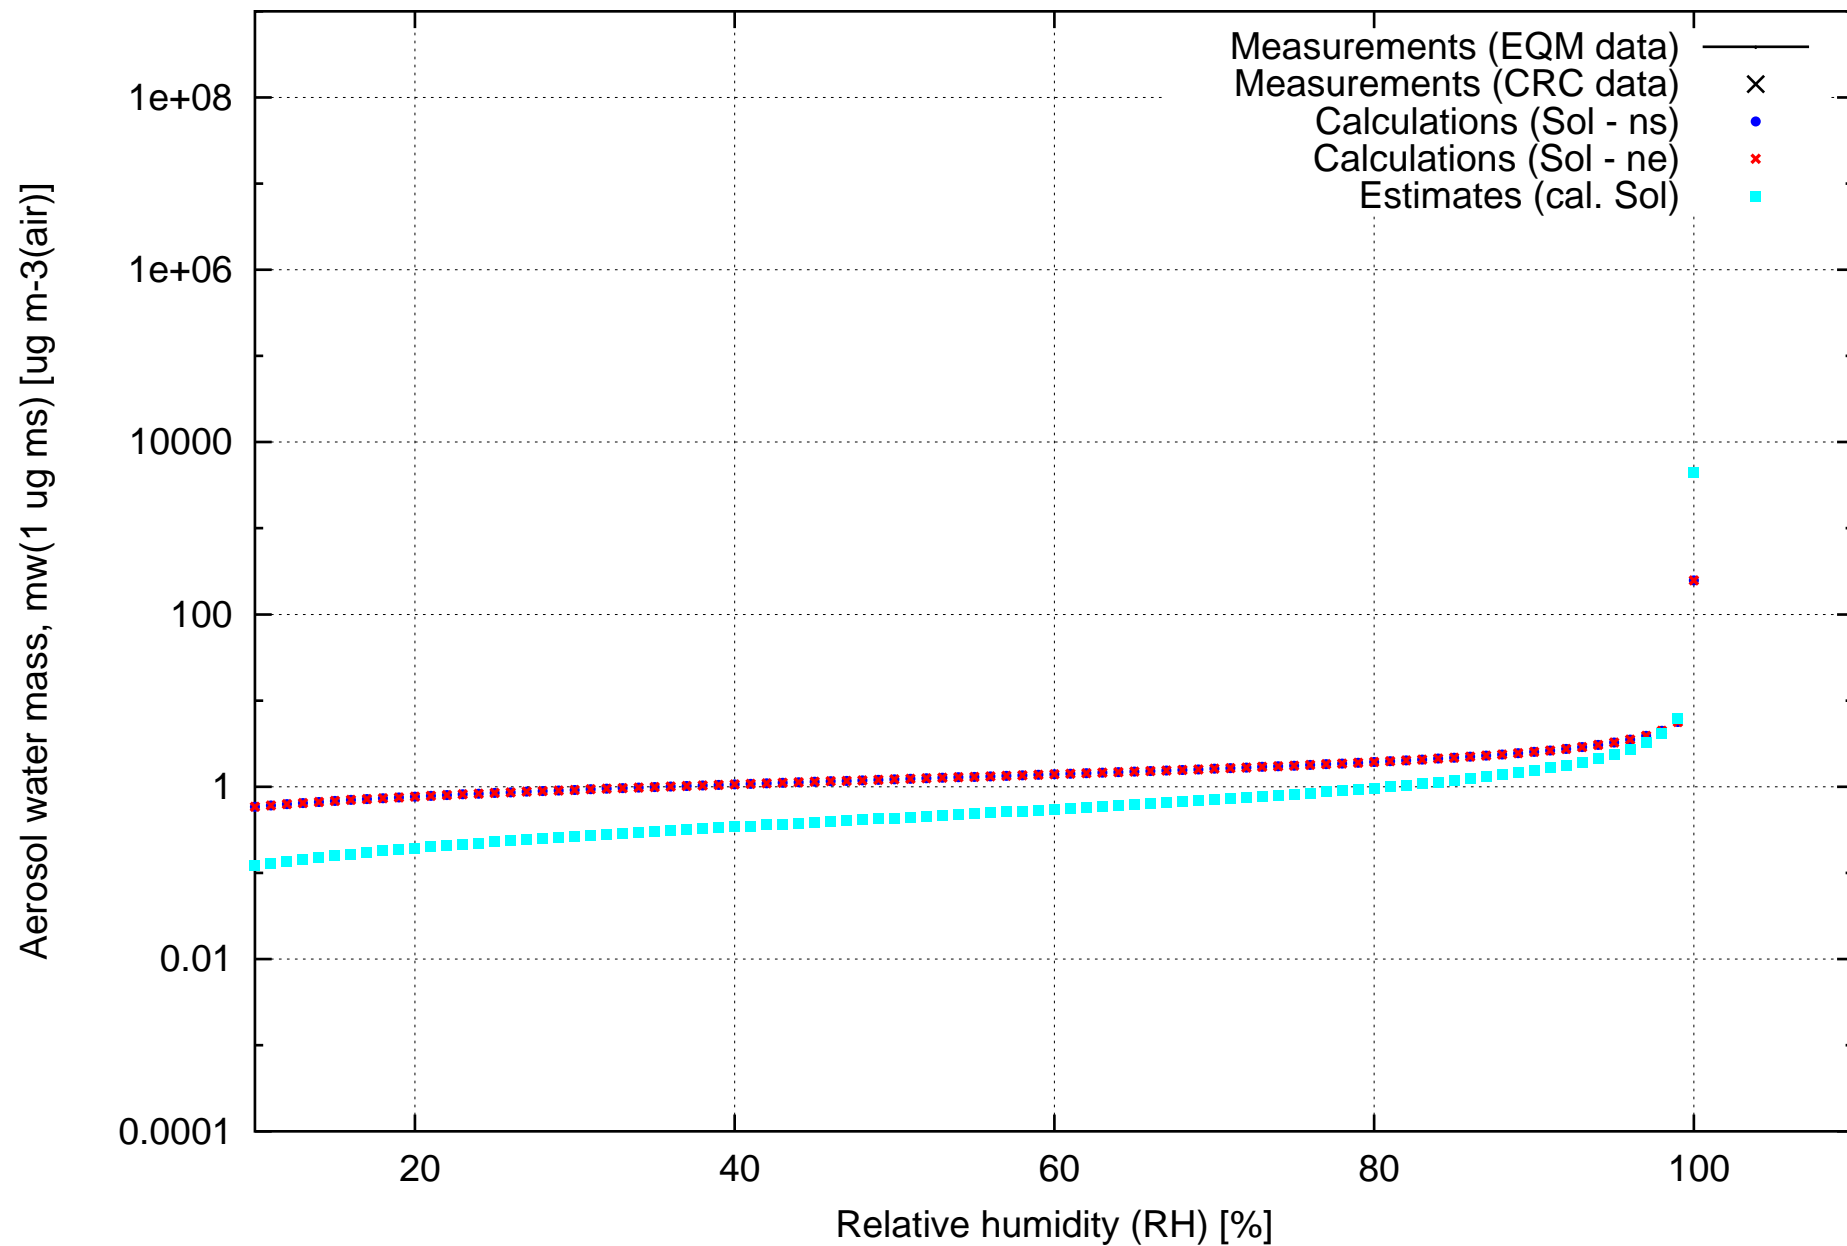

# Calcium sulfate - CaSO<sub>4</sub>

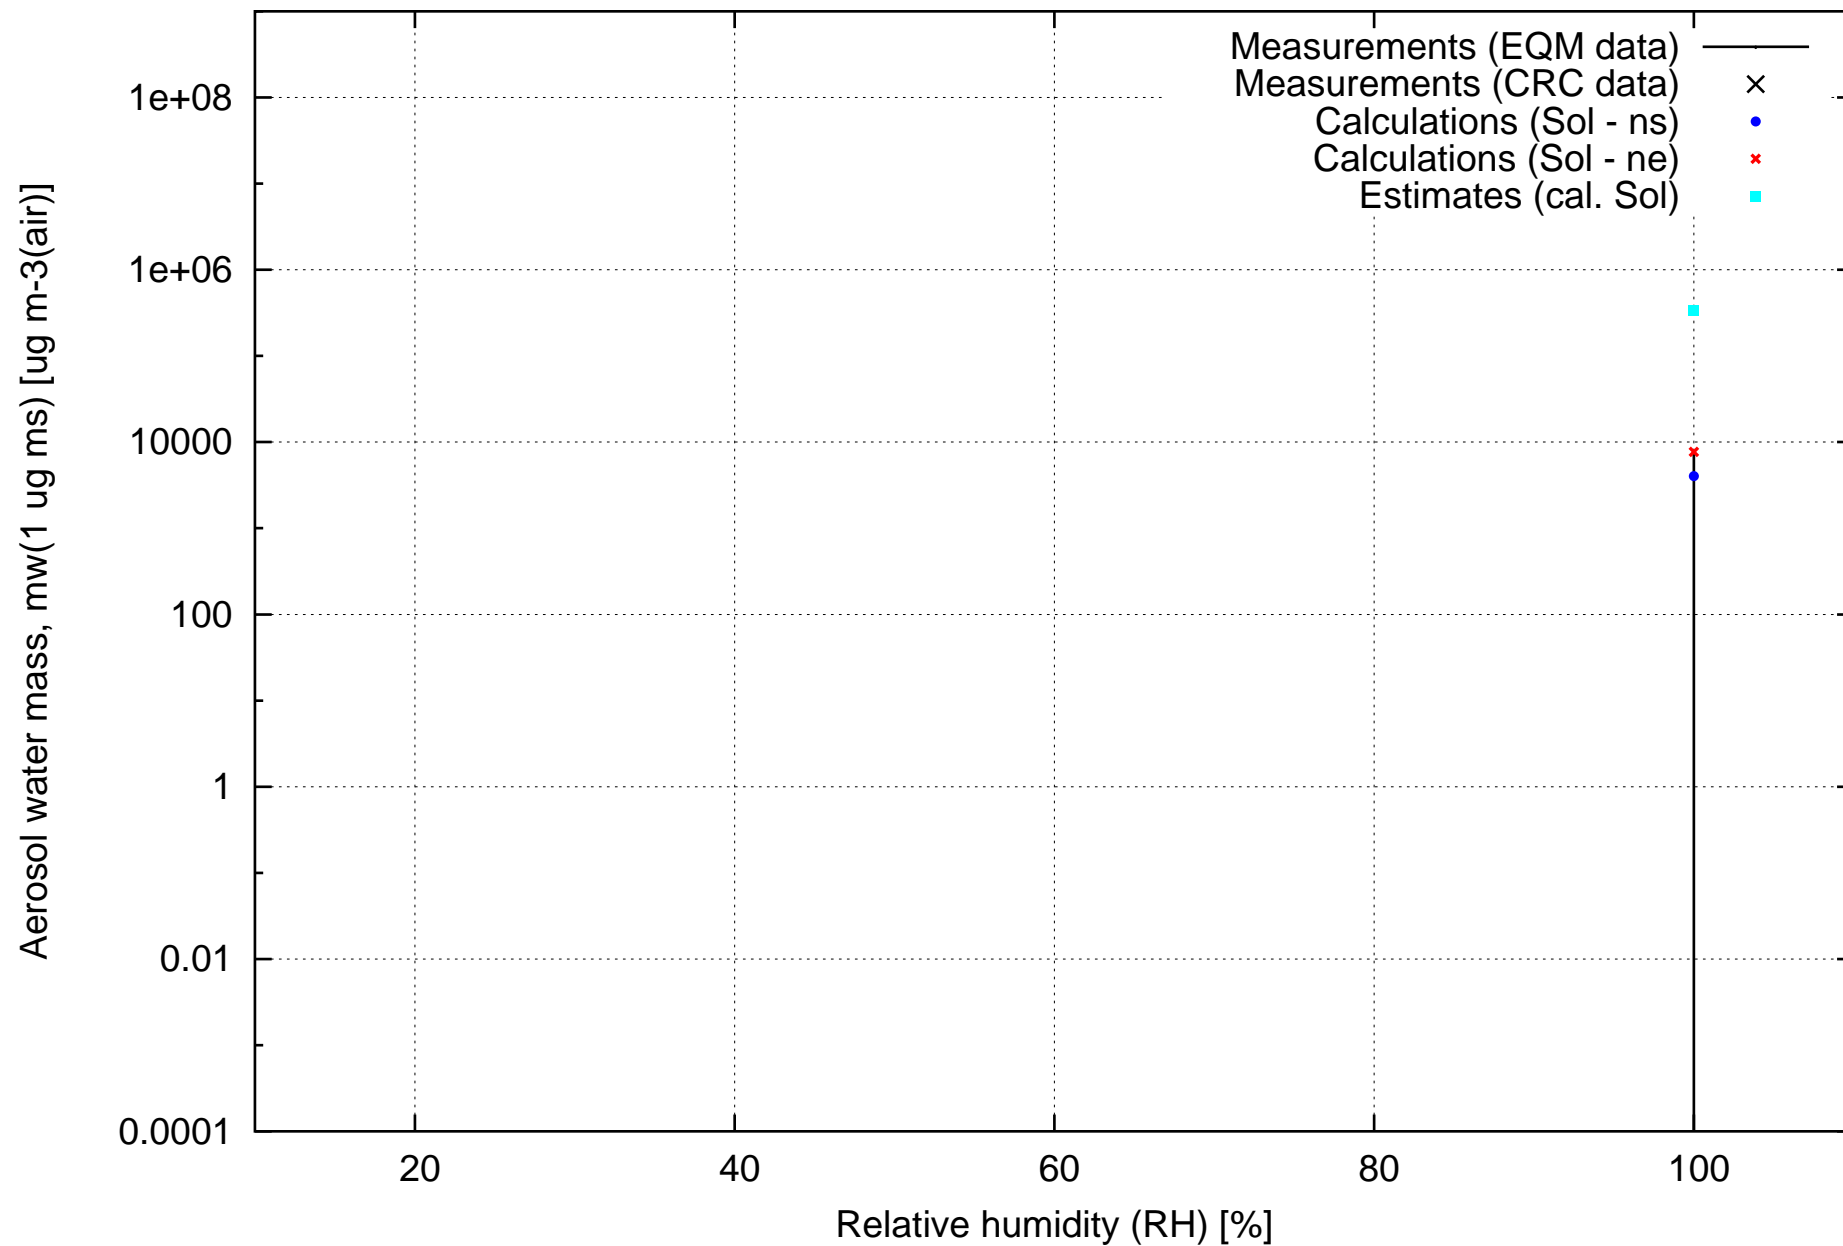

Calcium - dummy 03

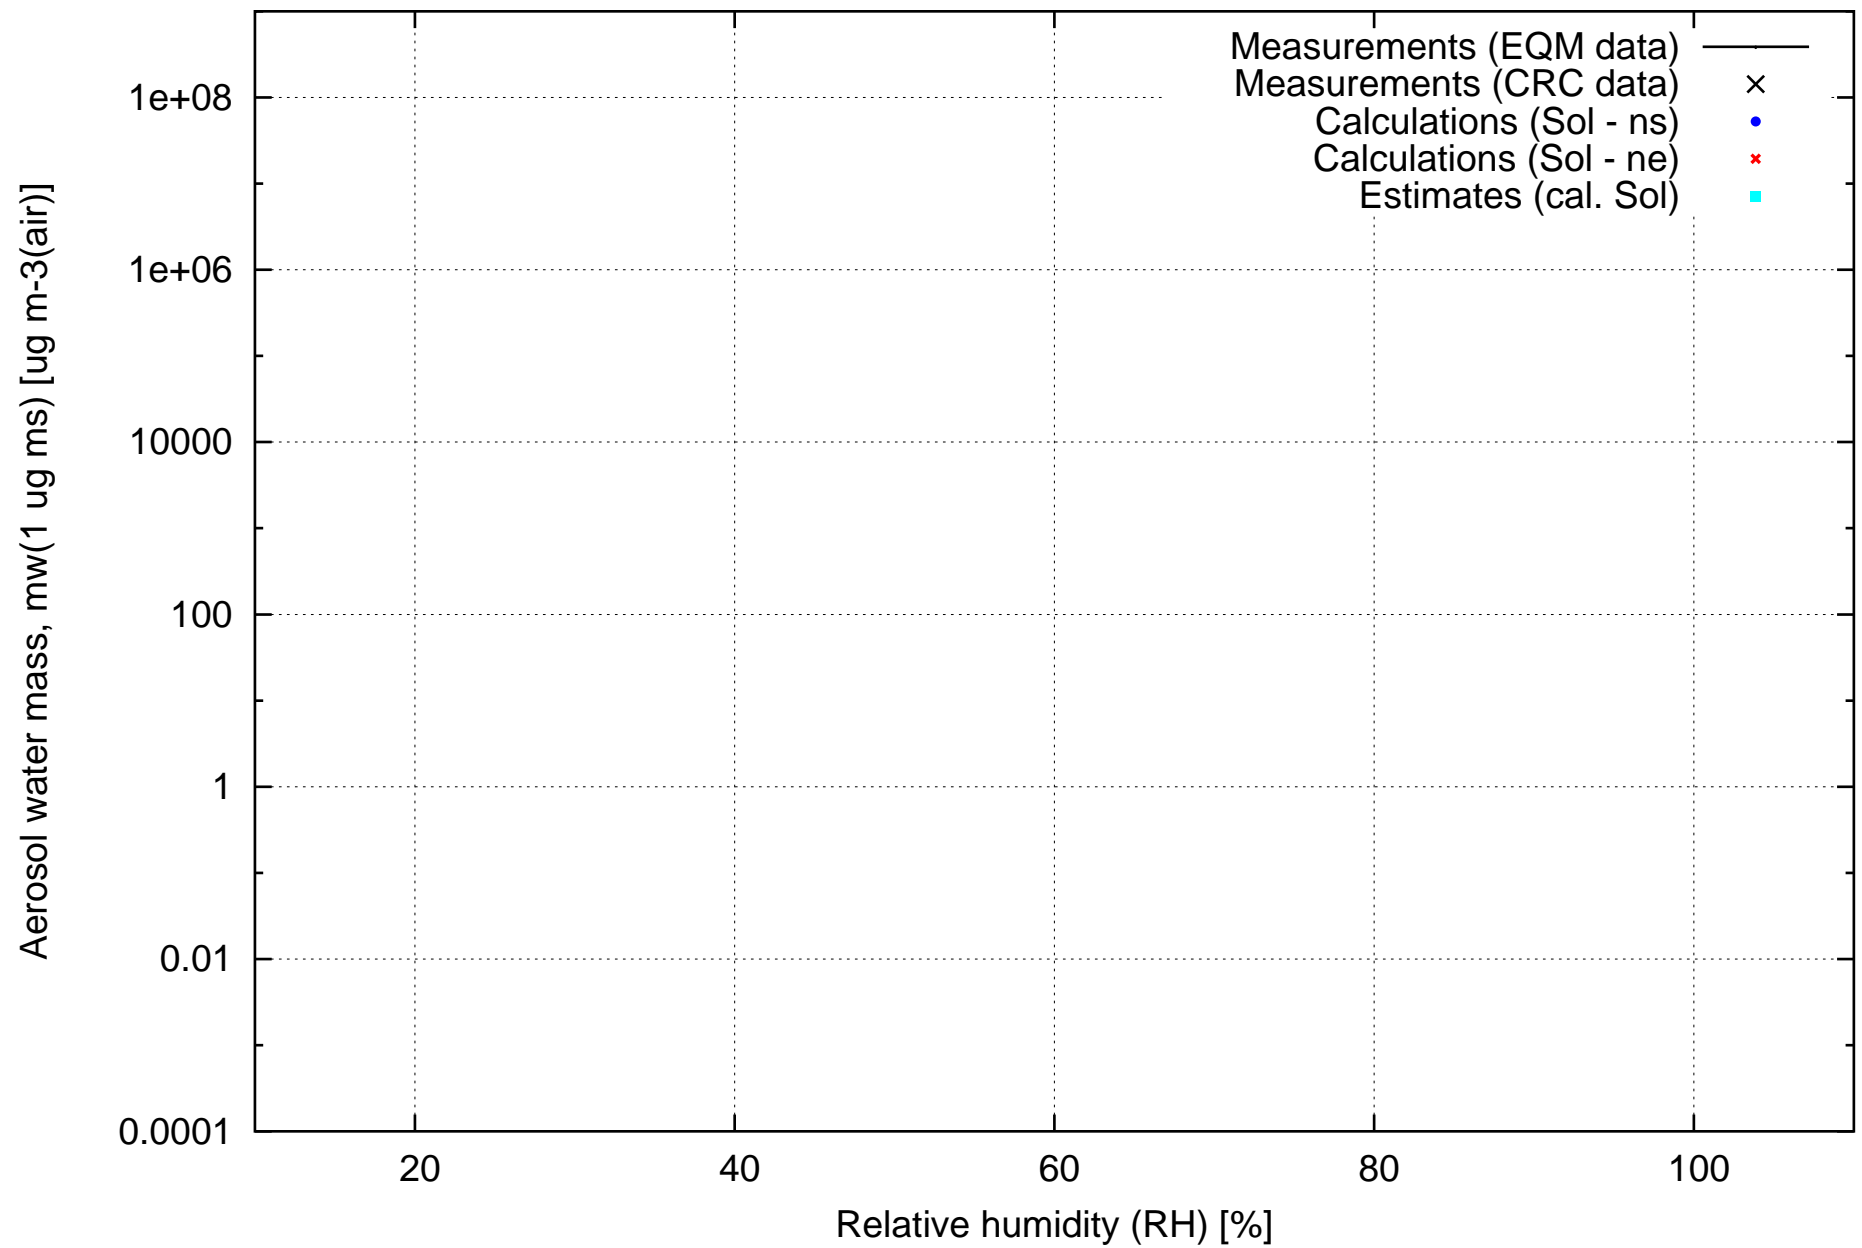

# Calcium nitrate - $\text{Ca}(\text{NO}_3)_2$

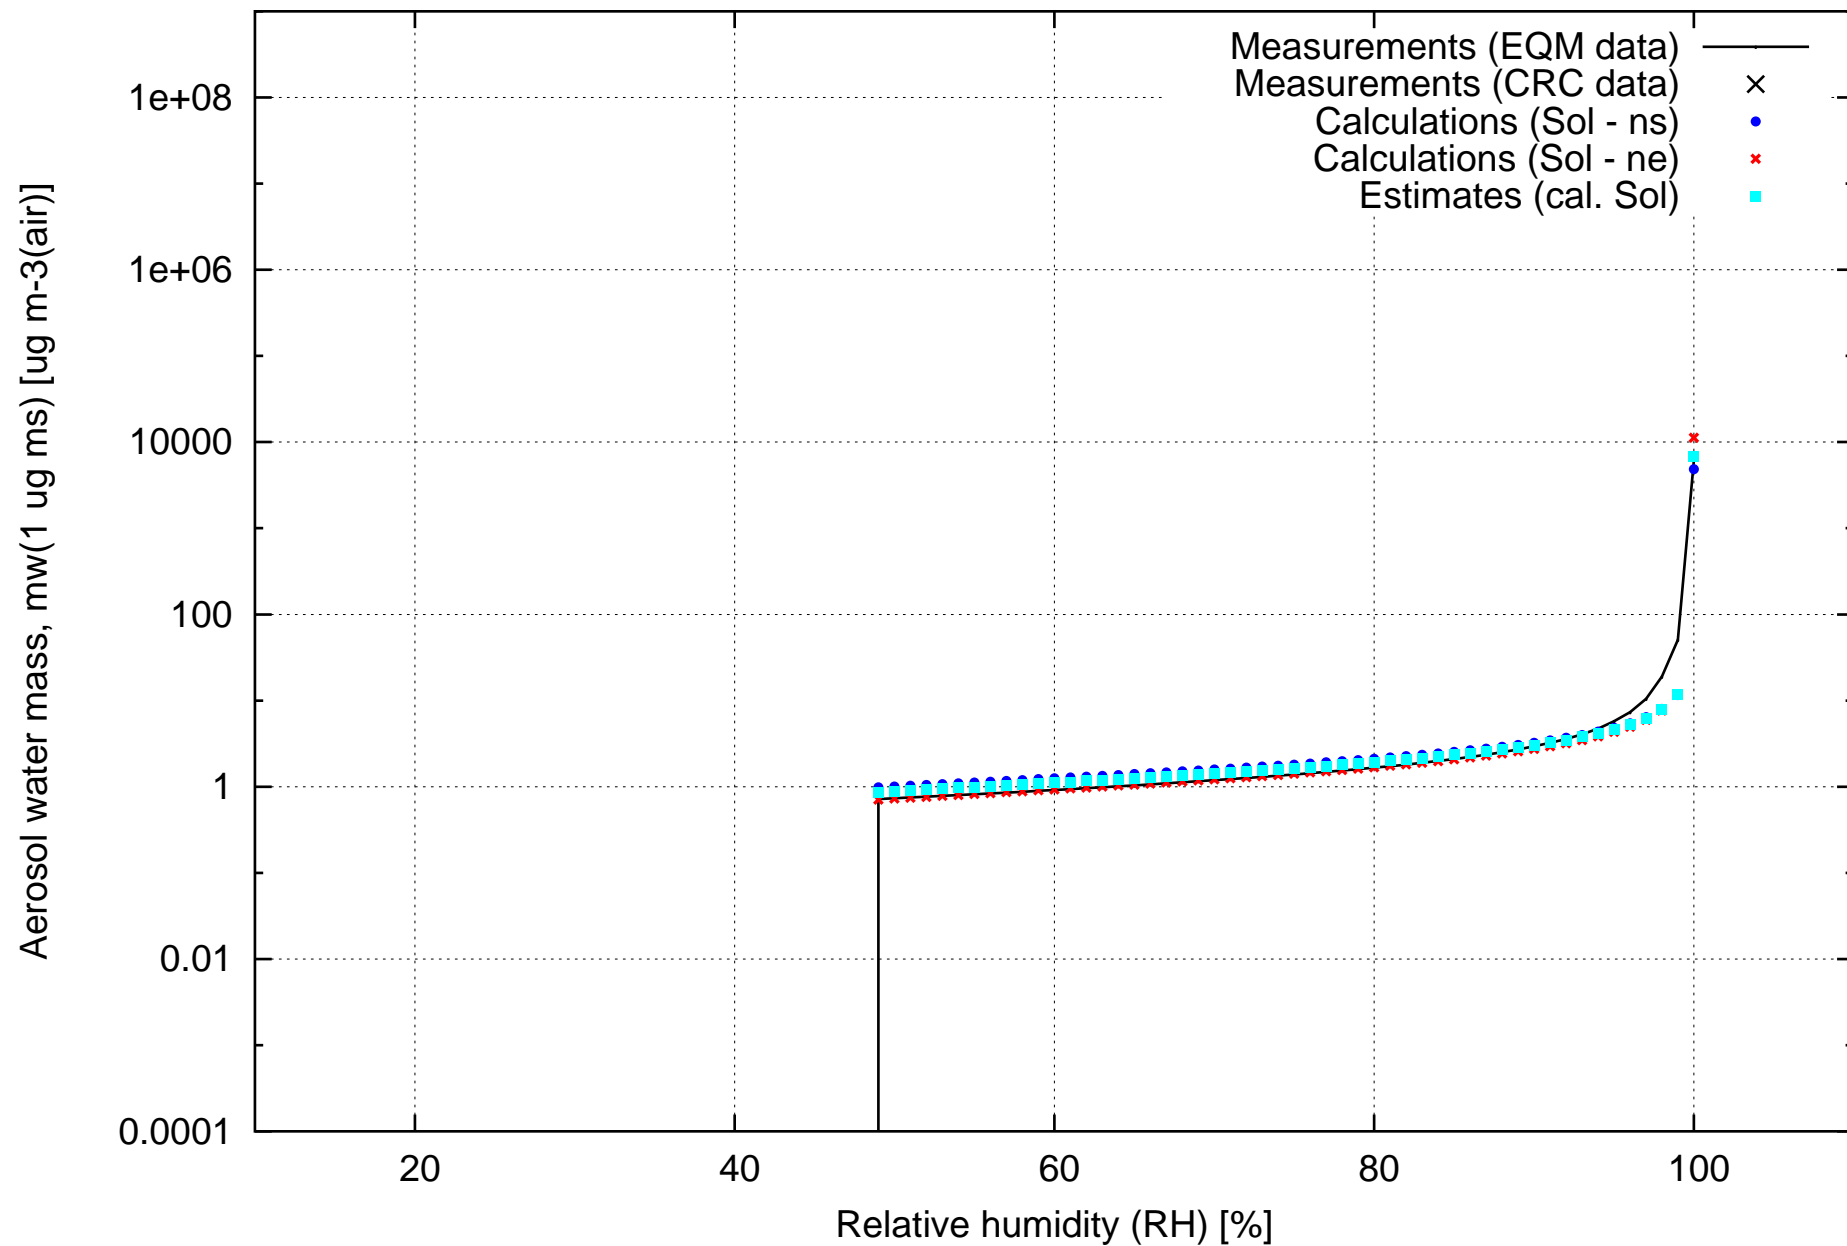

# Calcium chloride - CaCl<sub>2</sub>

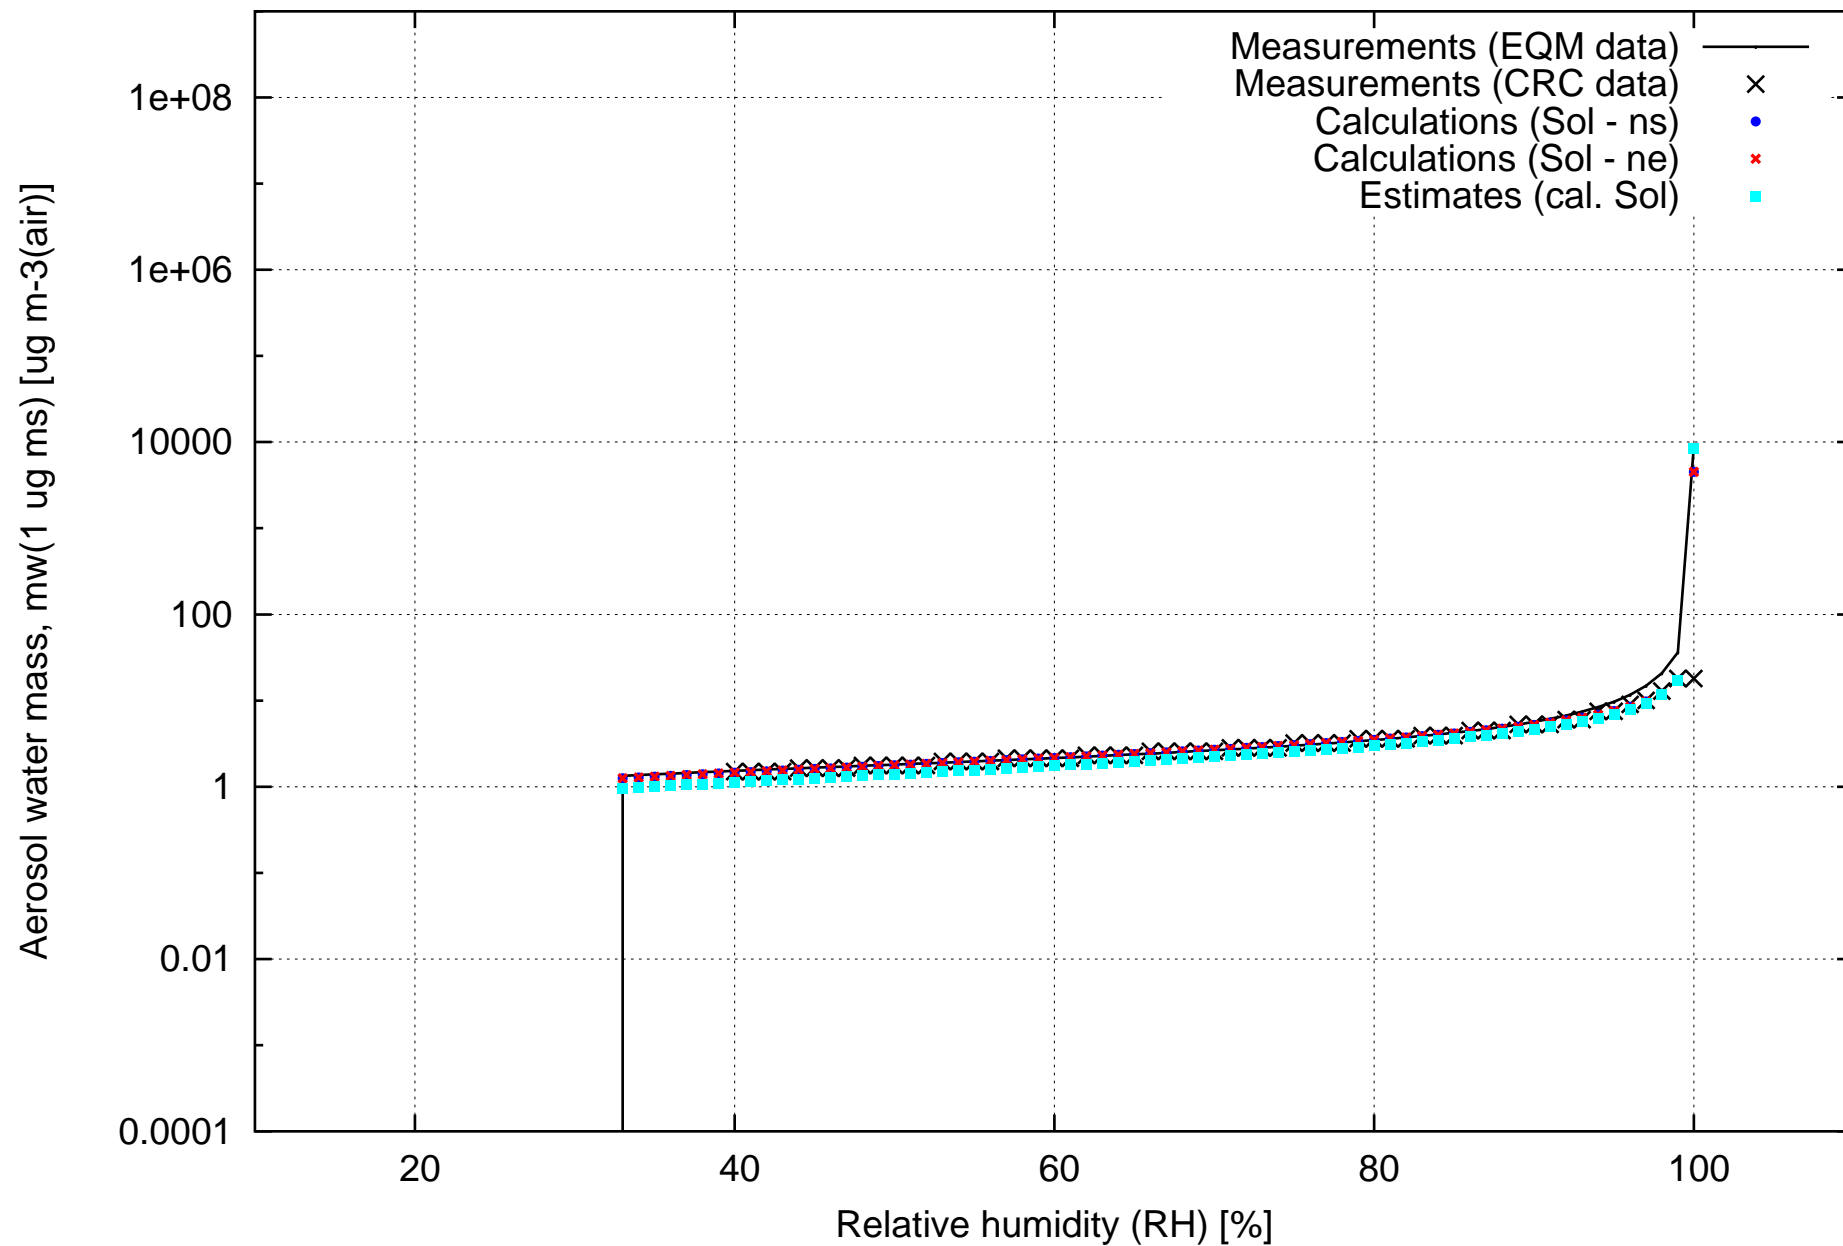

# Calcium bromide - CaBr<sub>2</sub>

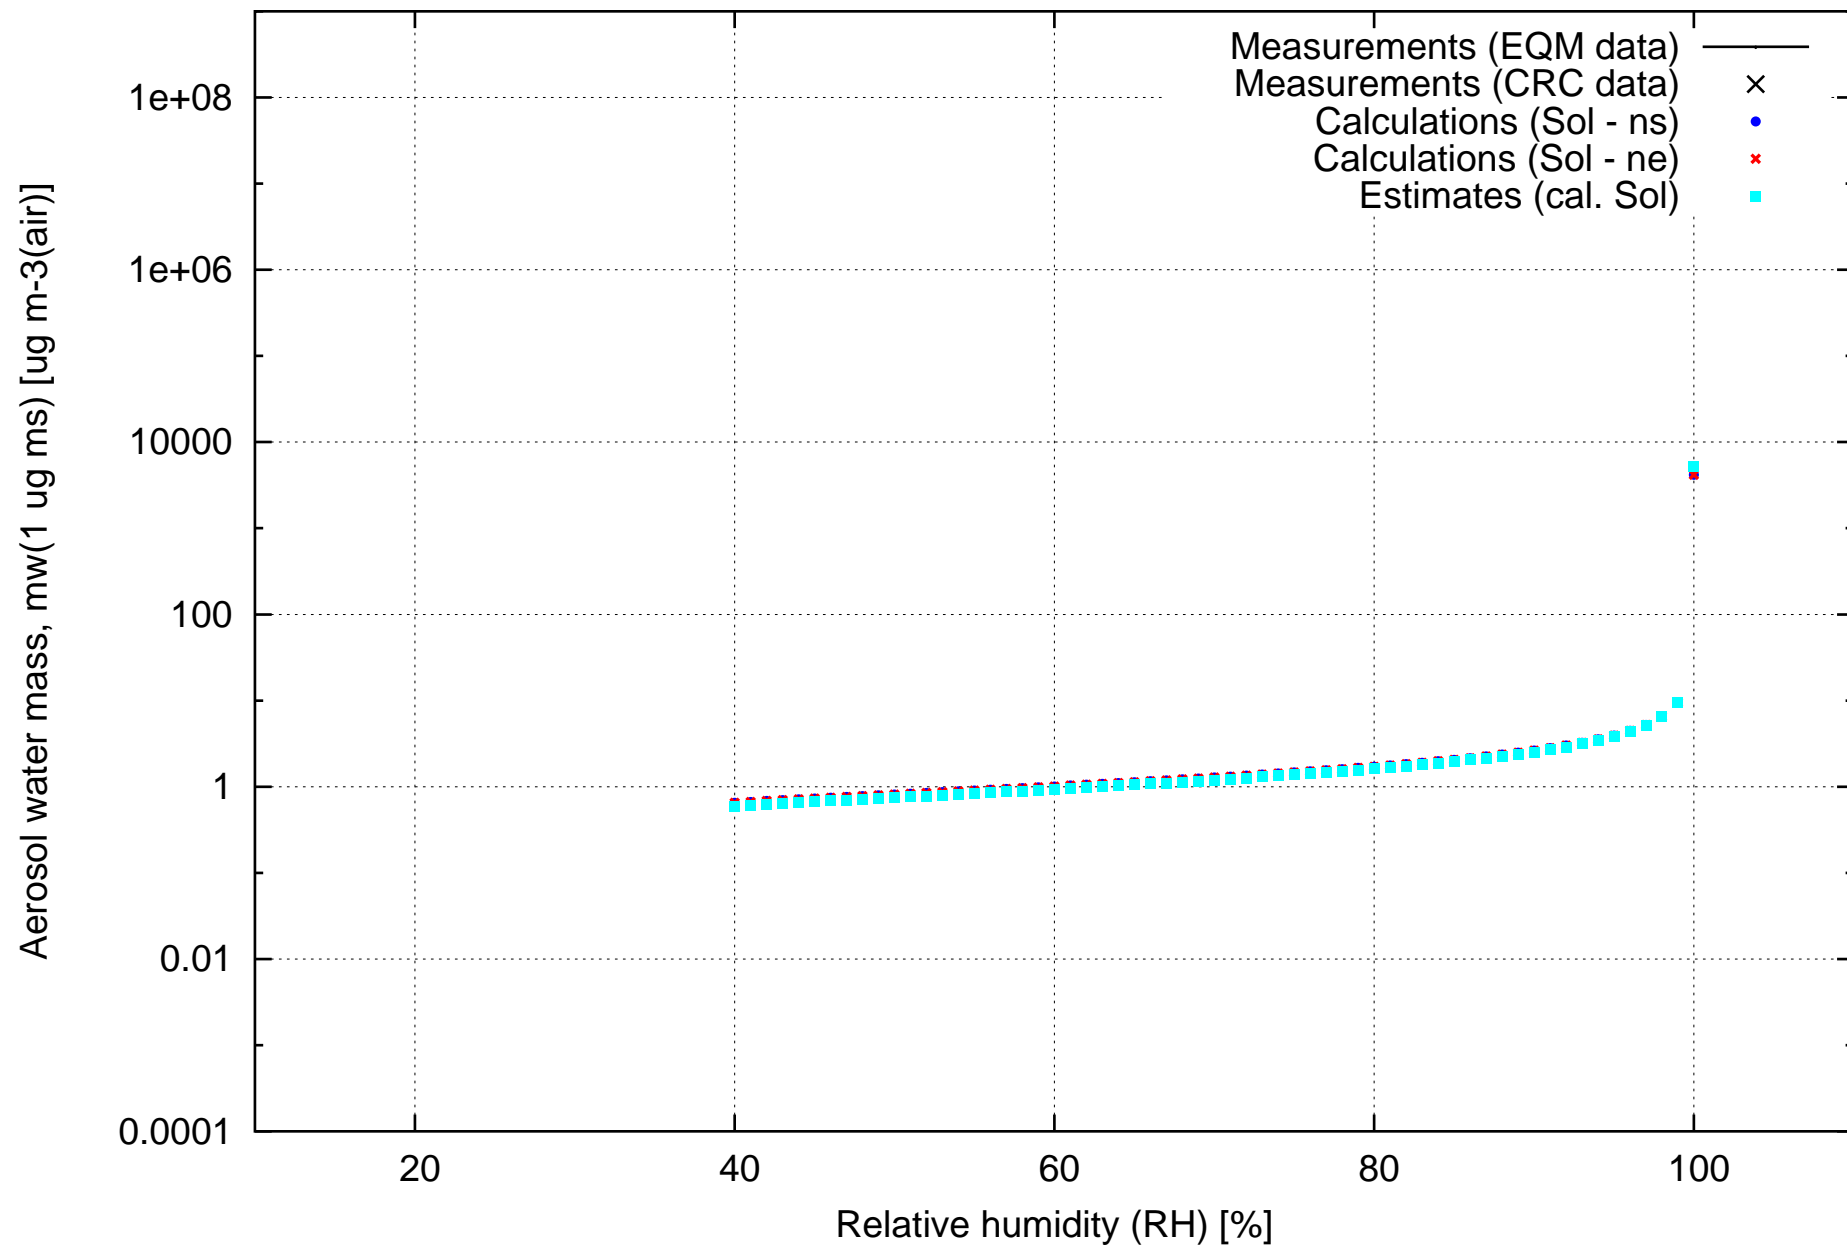

# Calcium iodide - Cal2

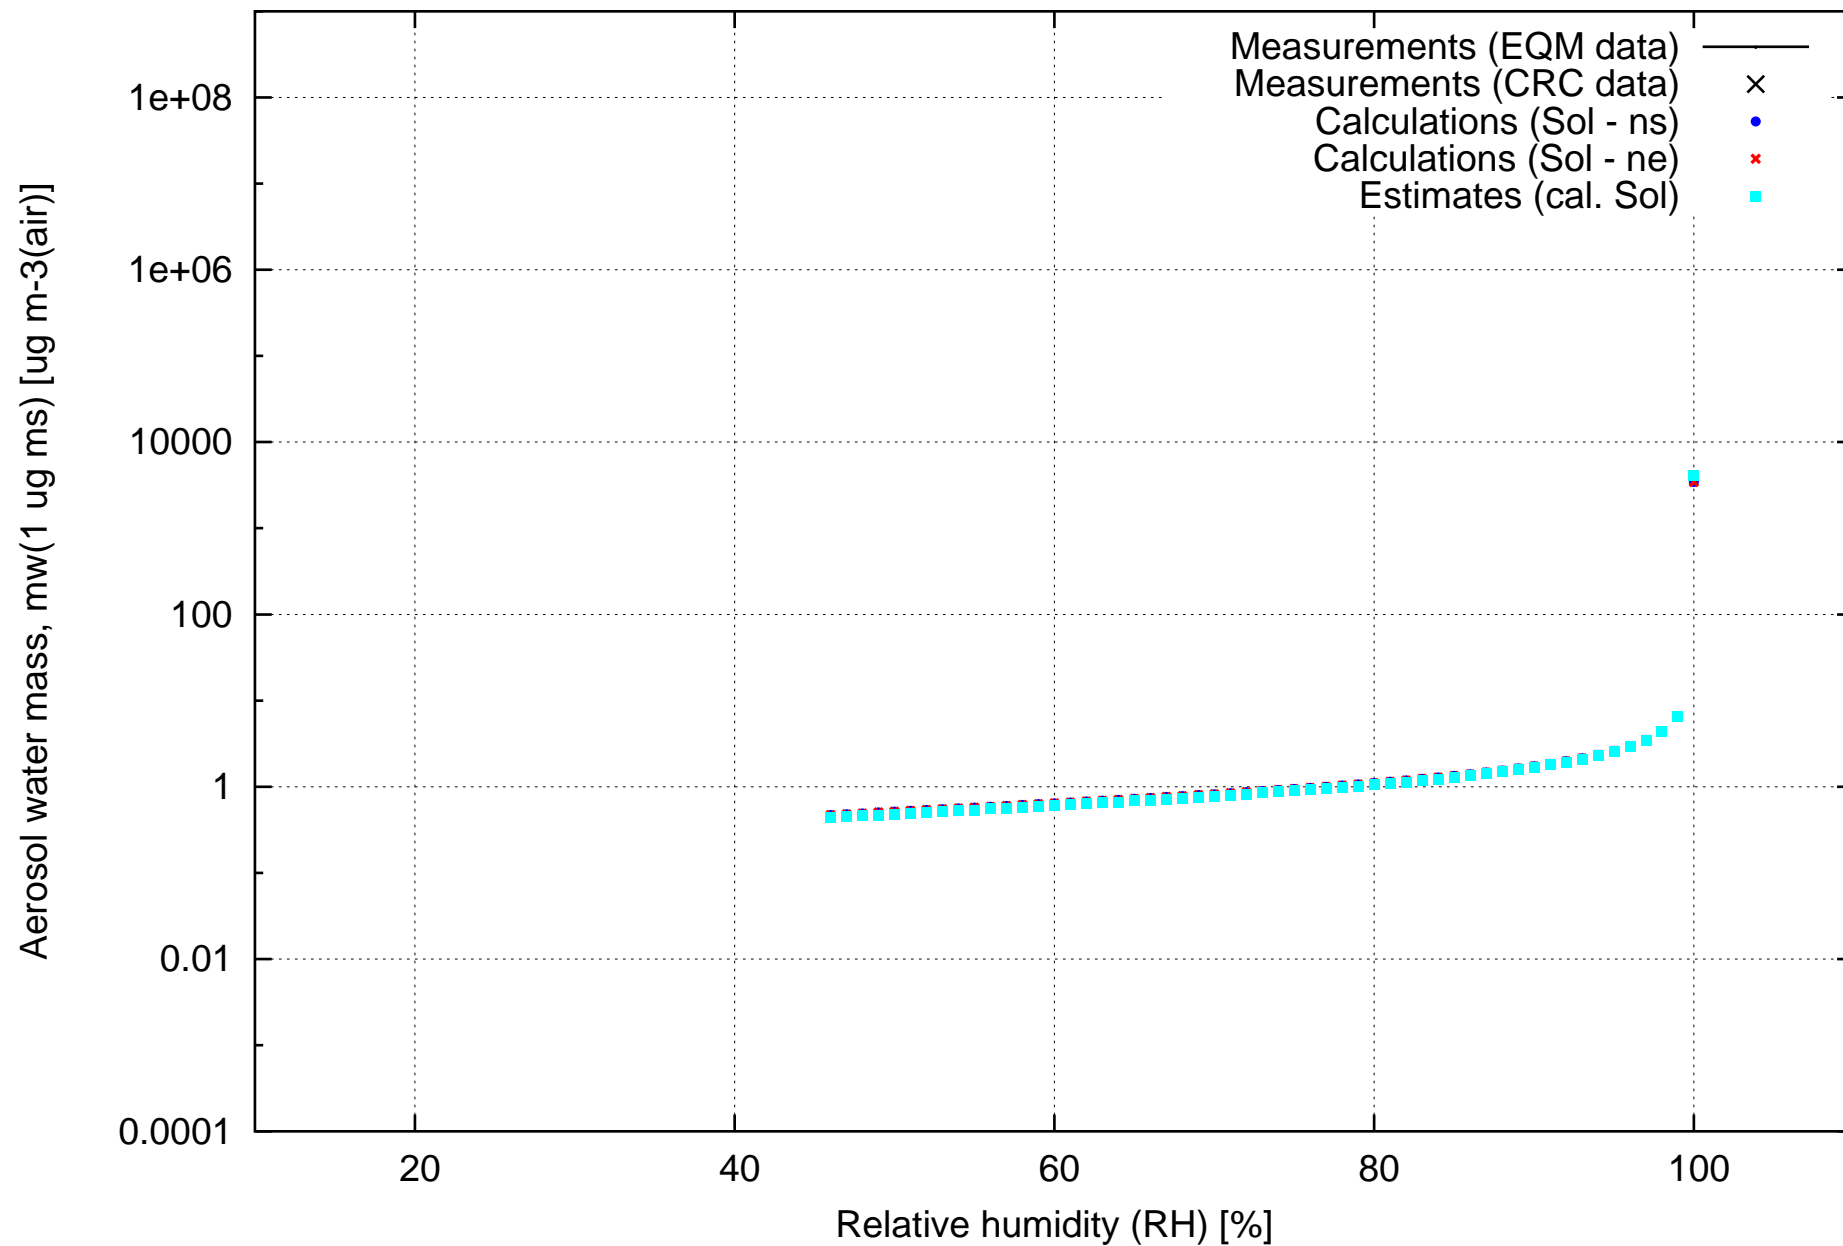

# Calcium carbonate - CaCO<sub>3</sub>

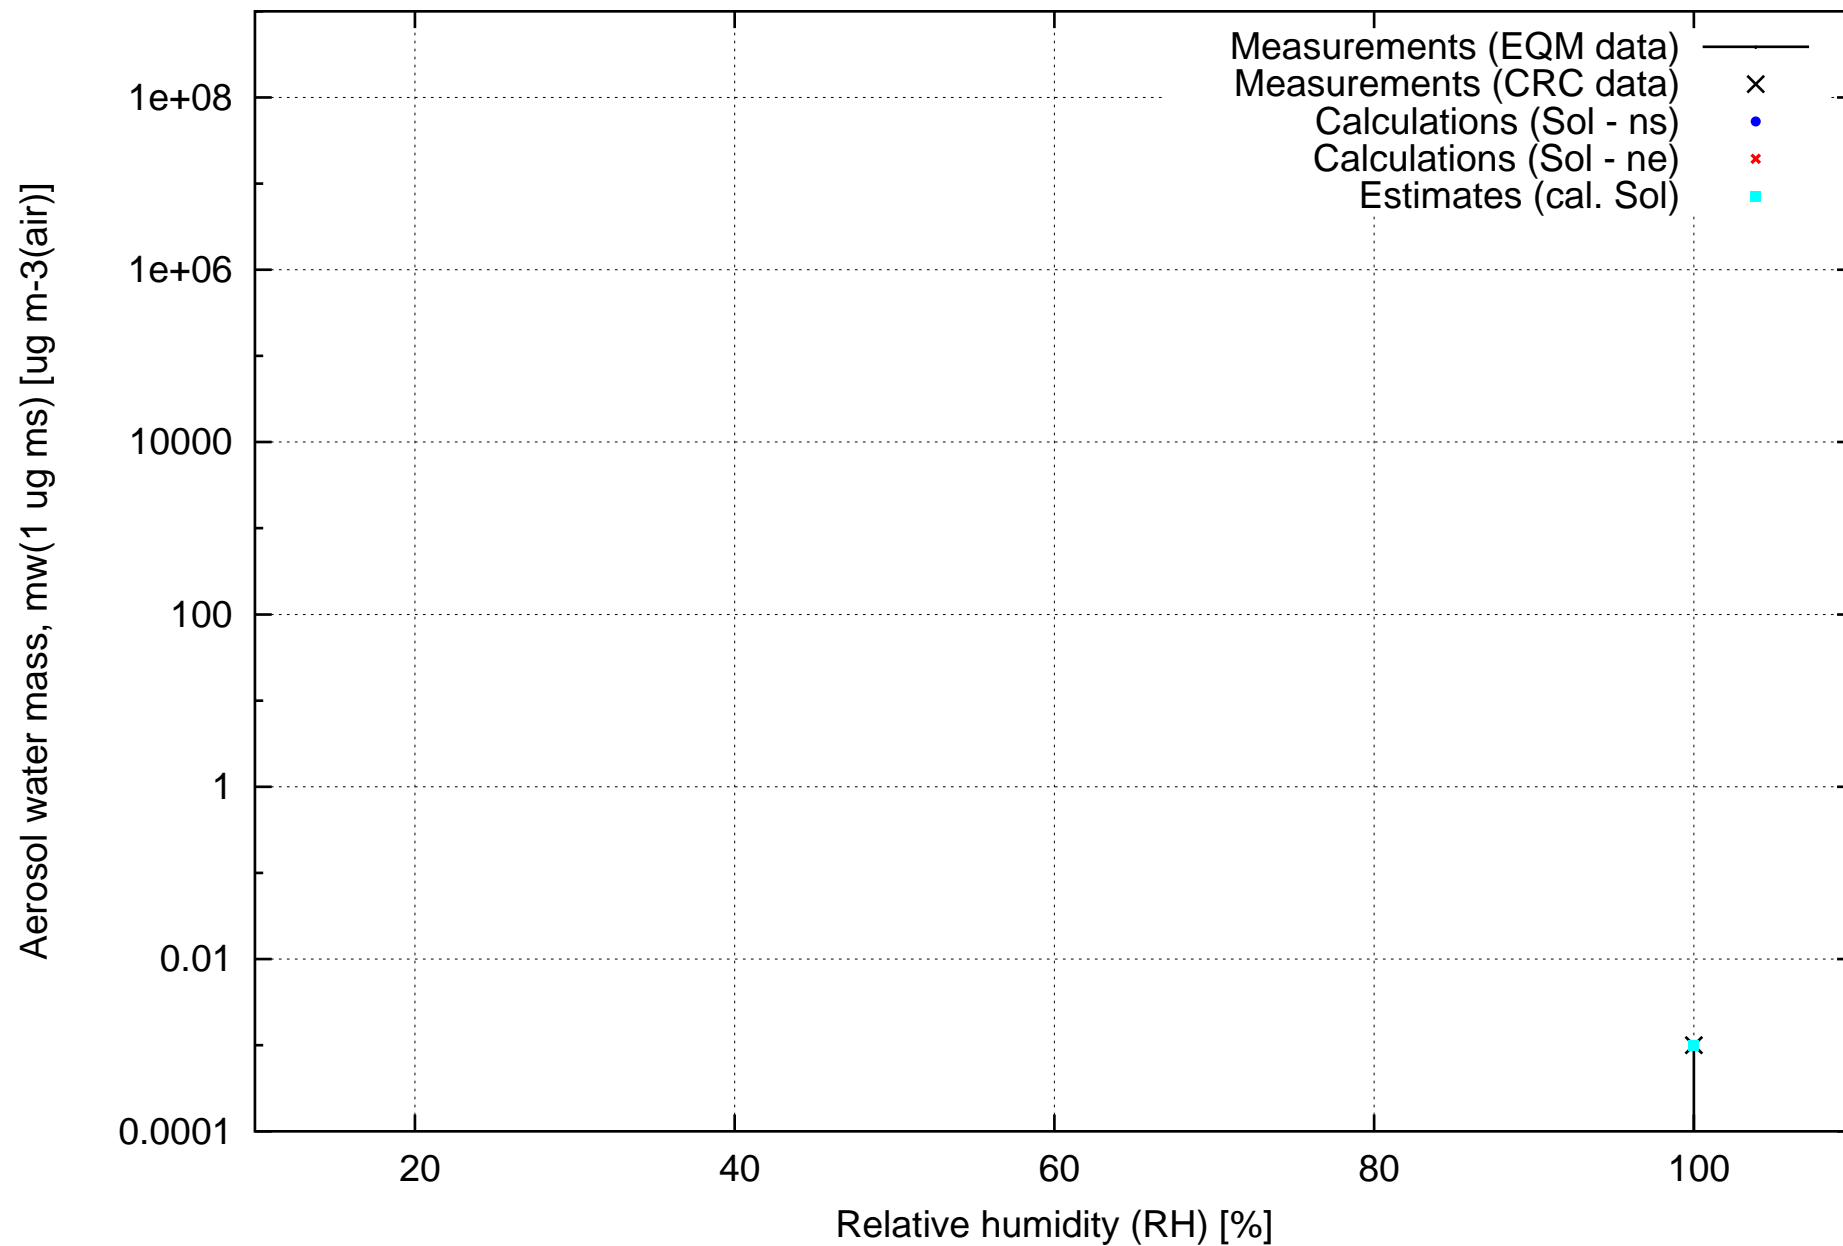



# Calcium - dummy 09



# Calcium hydroxide - Ca(OH)<sub>2</sub>

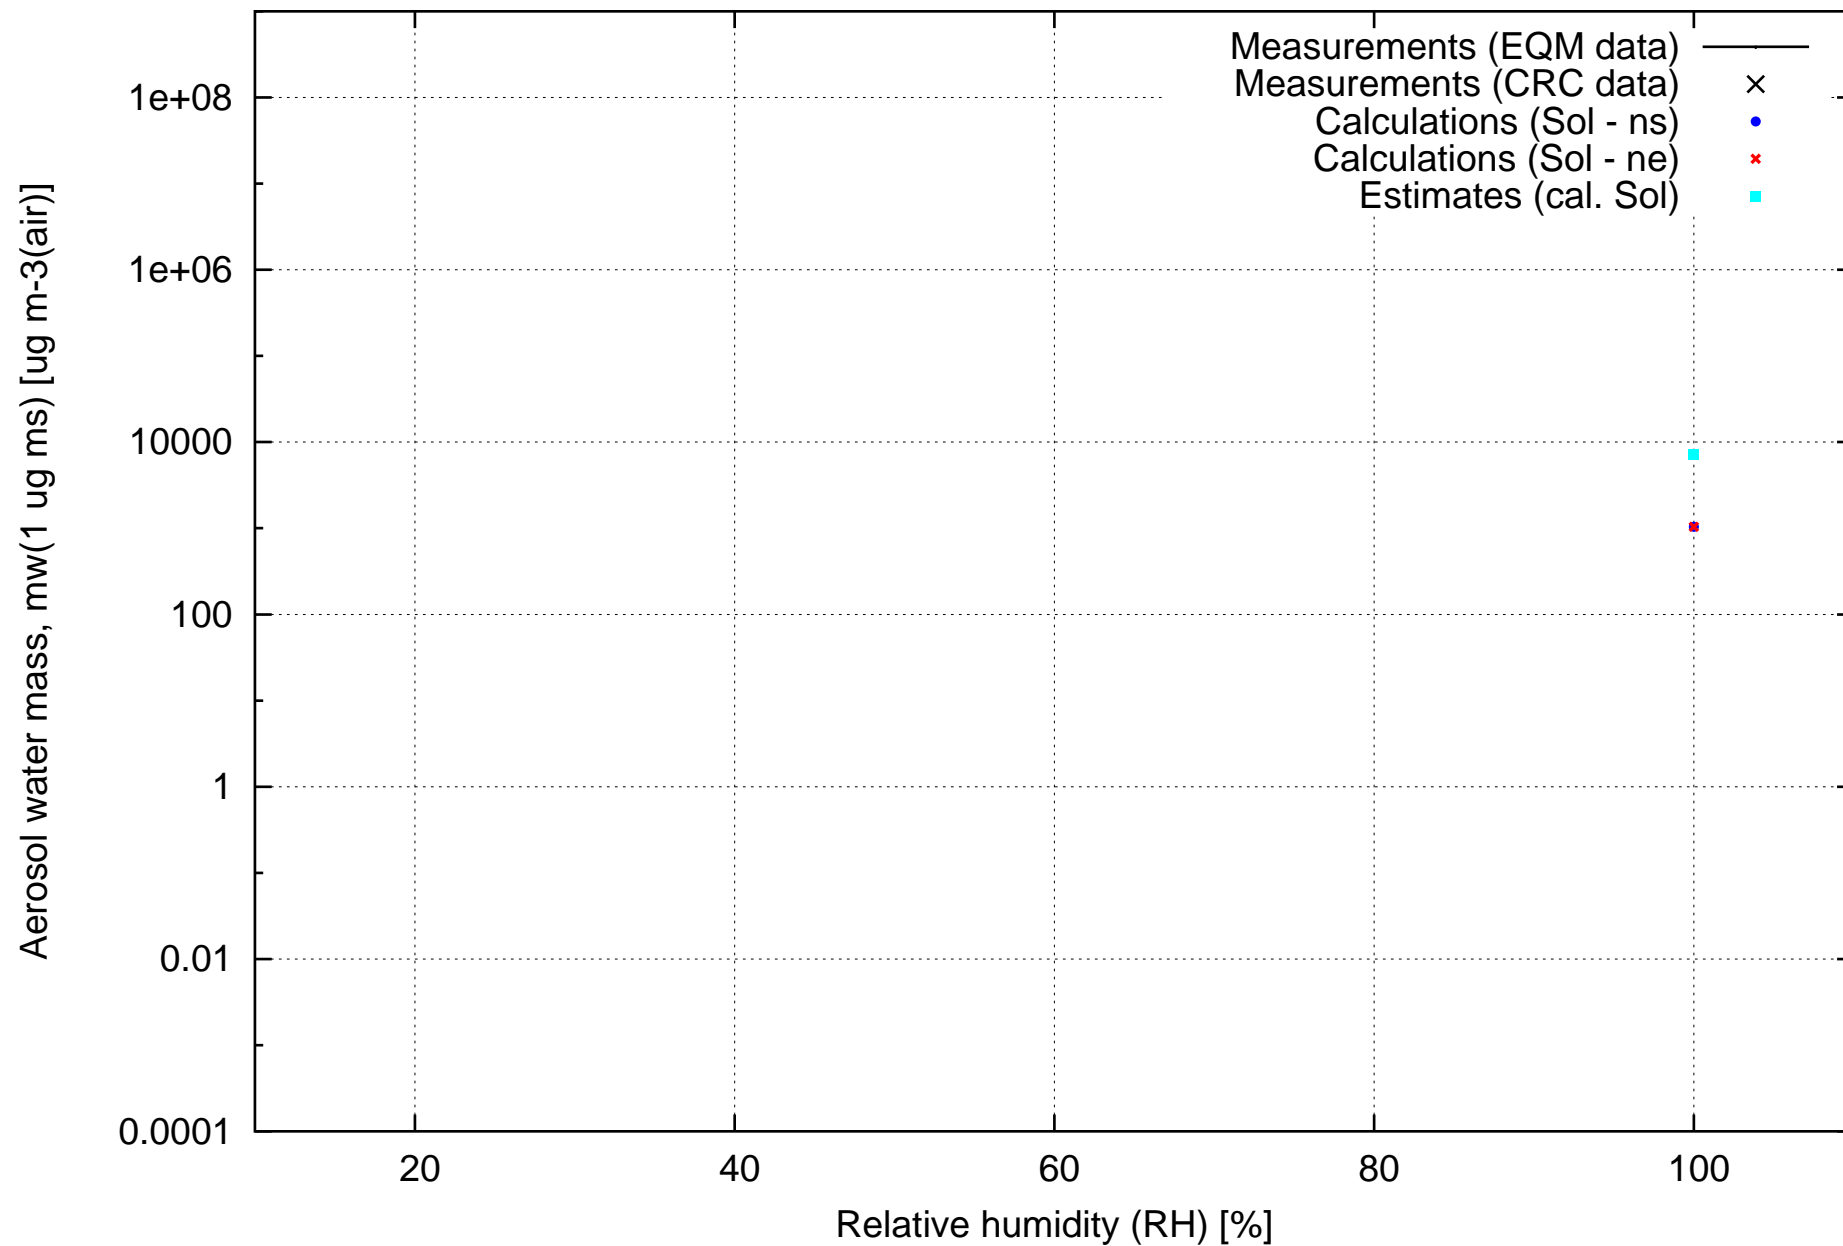

# Calcium formate - $\text{Ca}(\text{CHO}_2)_2$

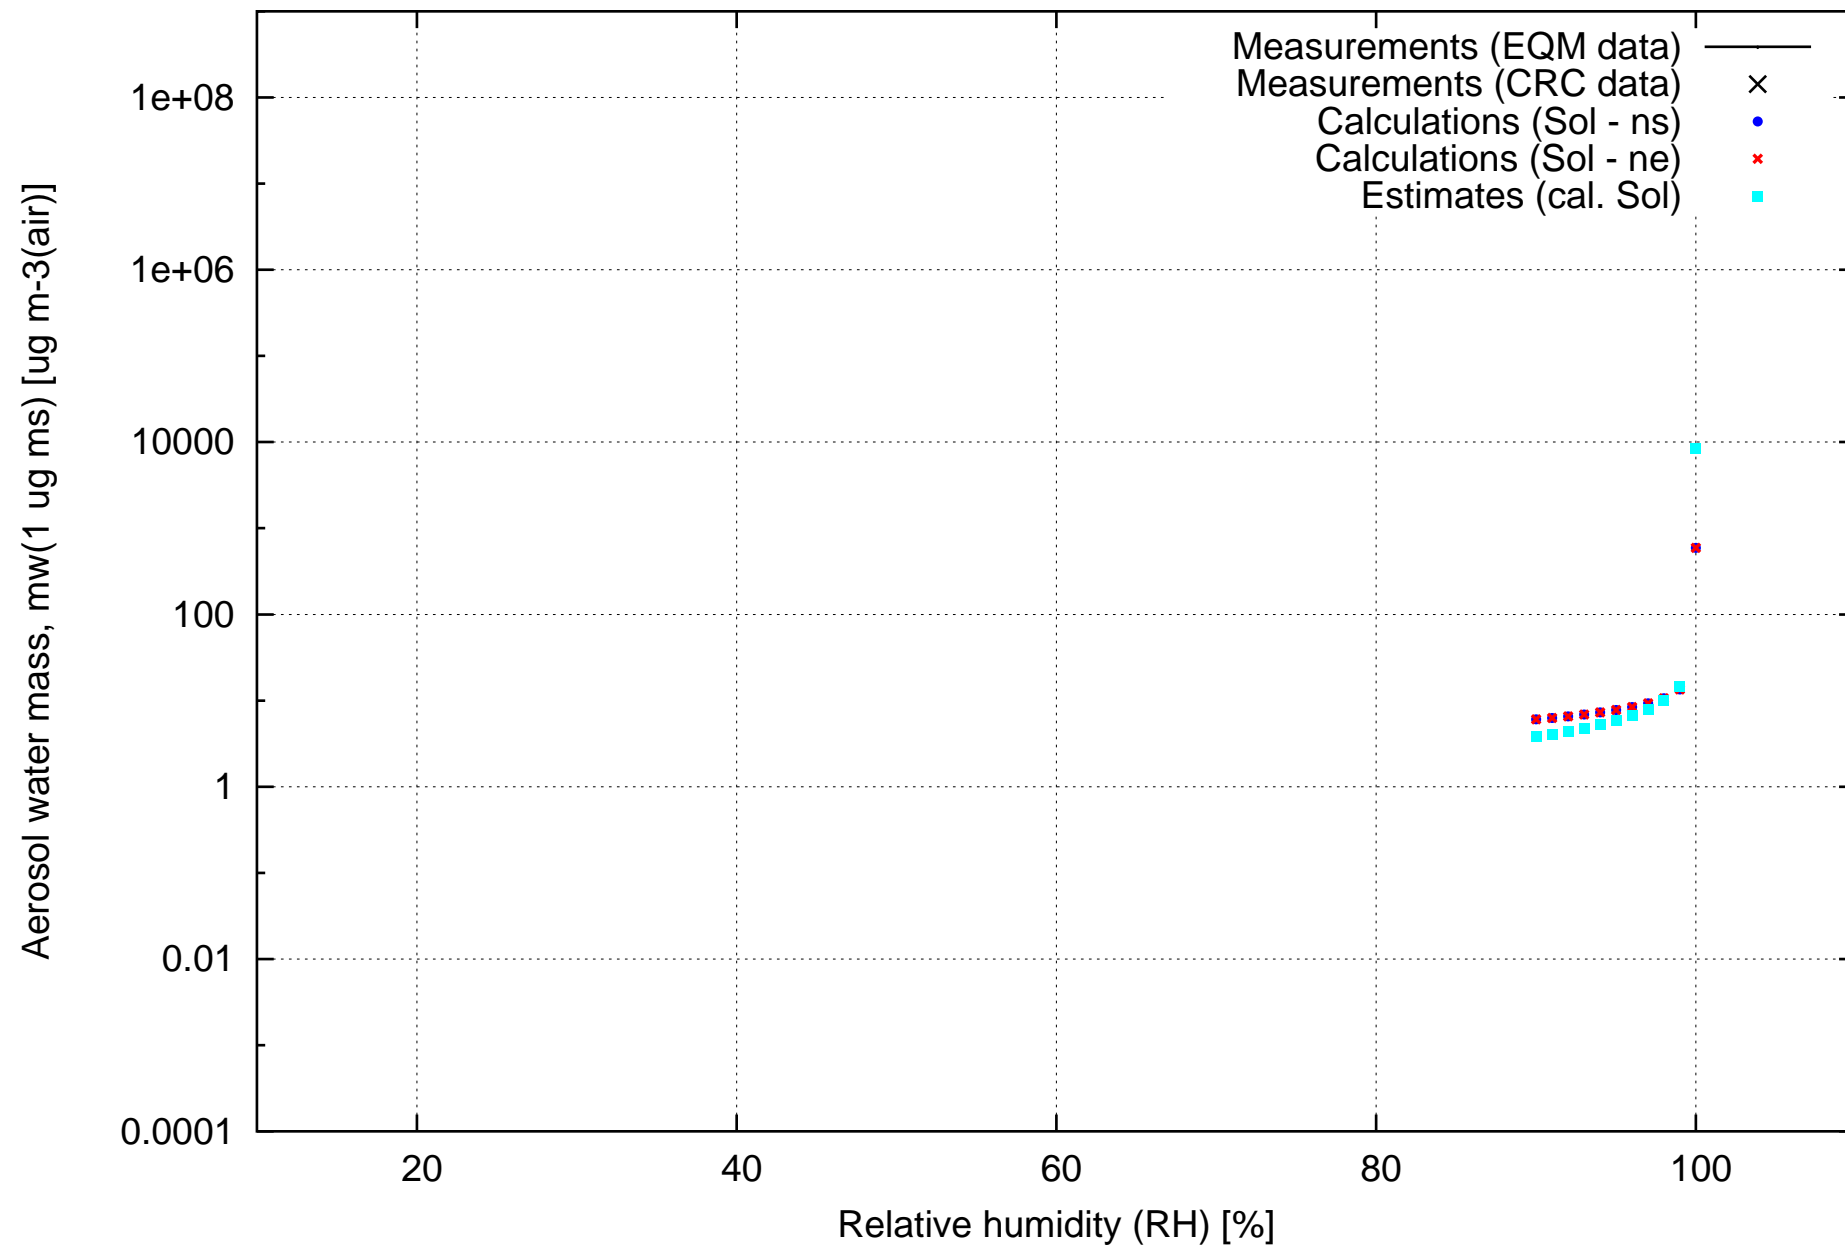

# Calcium acetate - $\text{Ca}(\text{C}_2\text{H}_3\text{O}_2)_2$

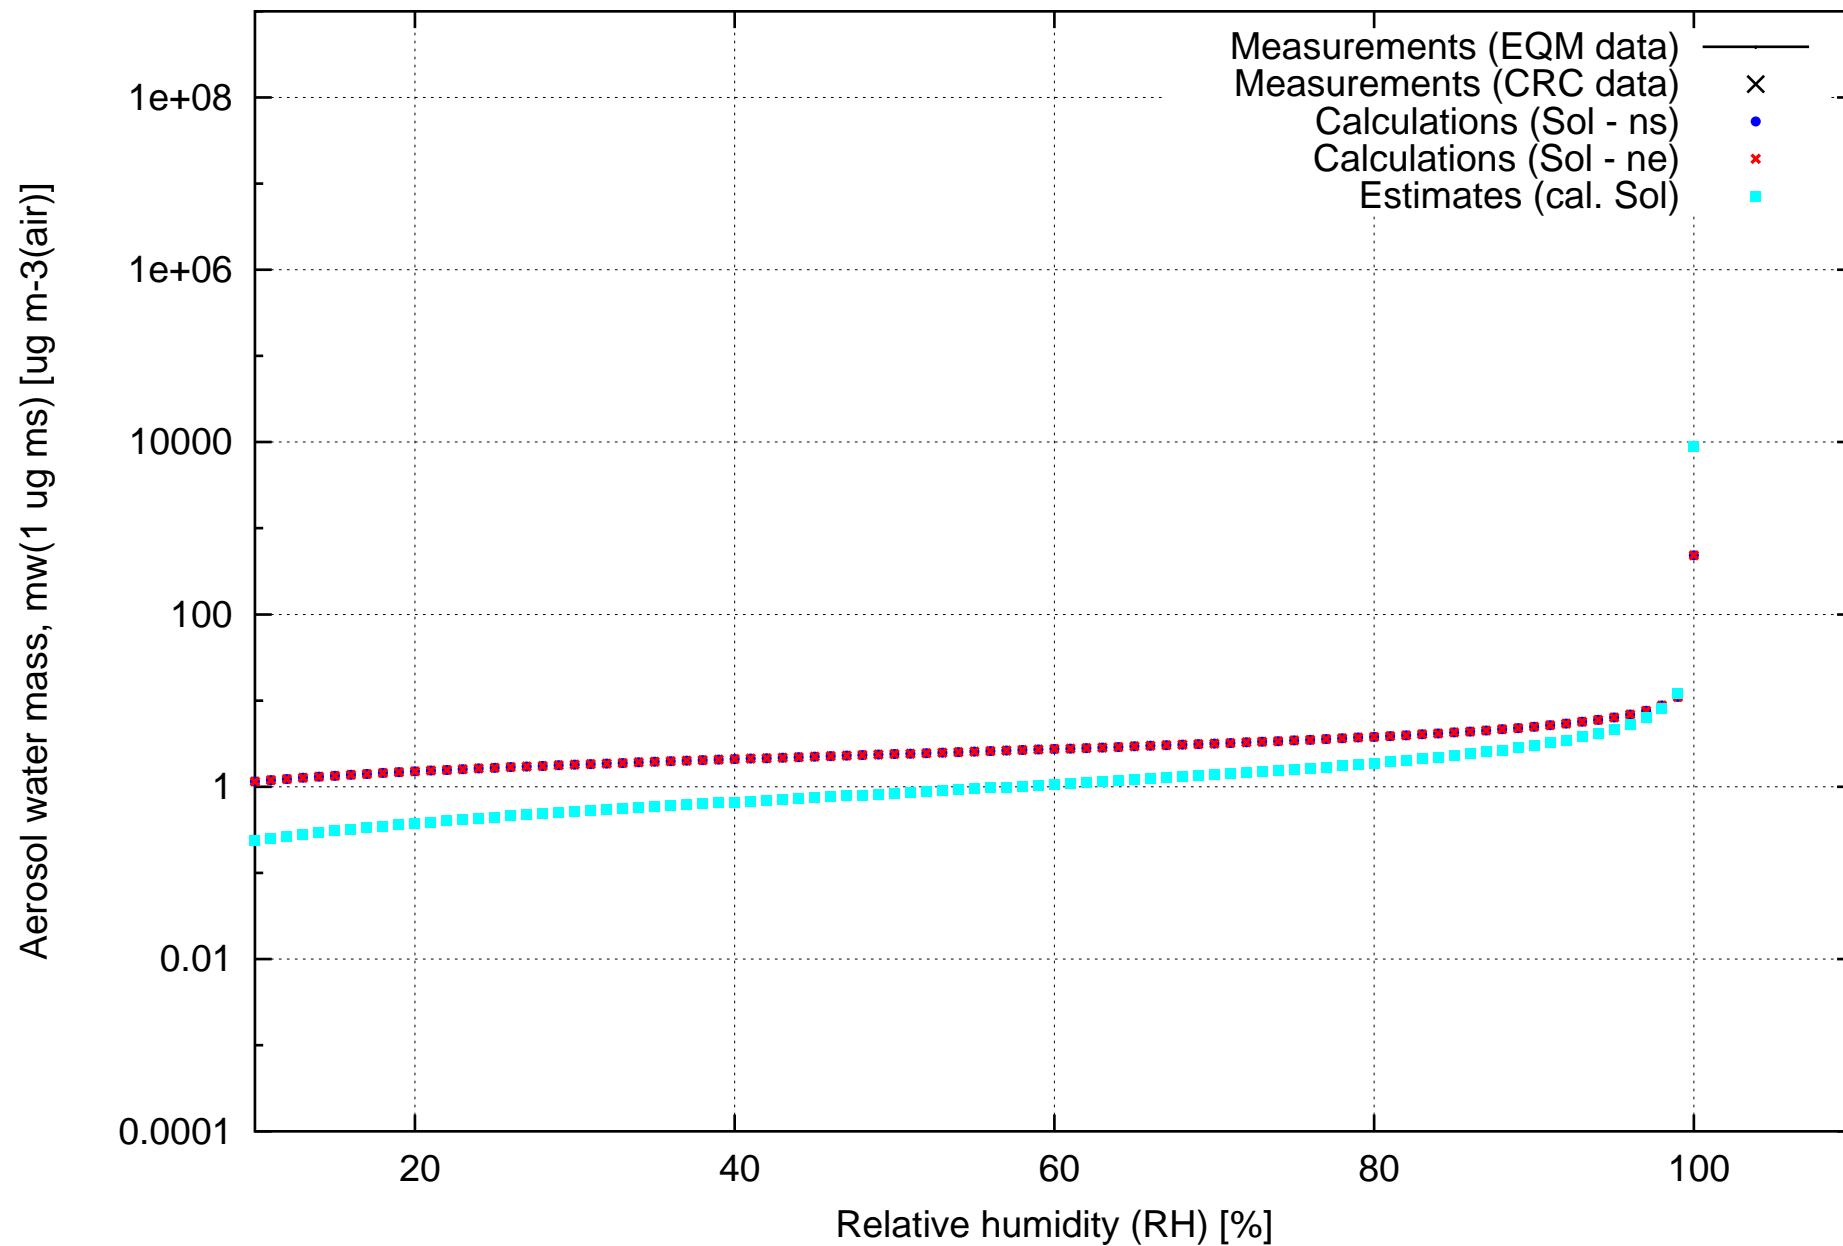

# Calcium oxalate - CaC<sub>2</sub>O<sub>4</sub>



# Calcium citrate - $\text{Ca}_3(\text{C}_6\text{H}_5\text{O}_7)_2$

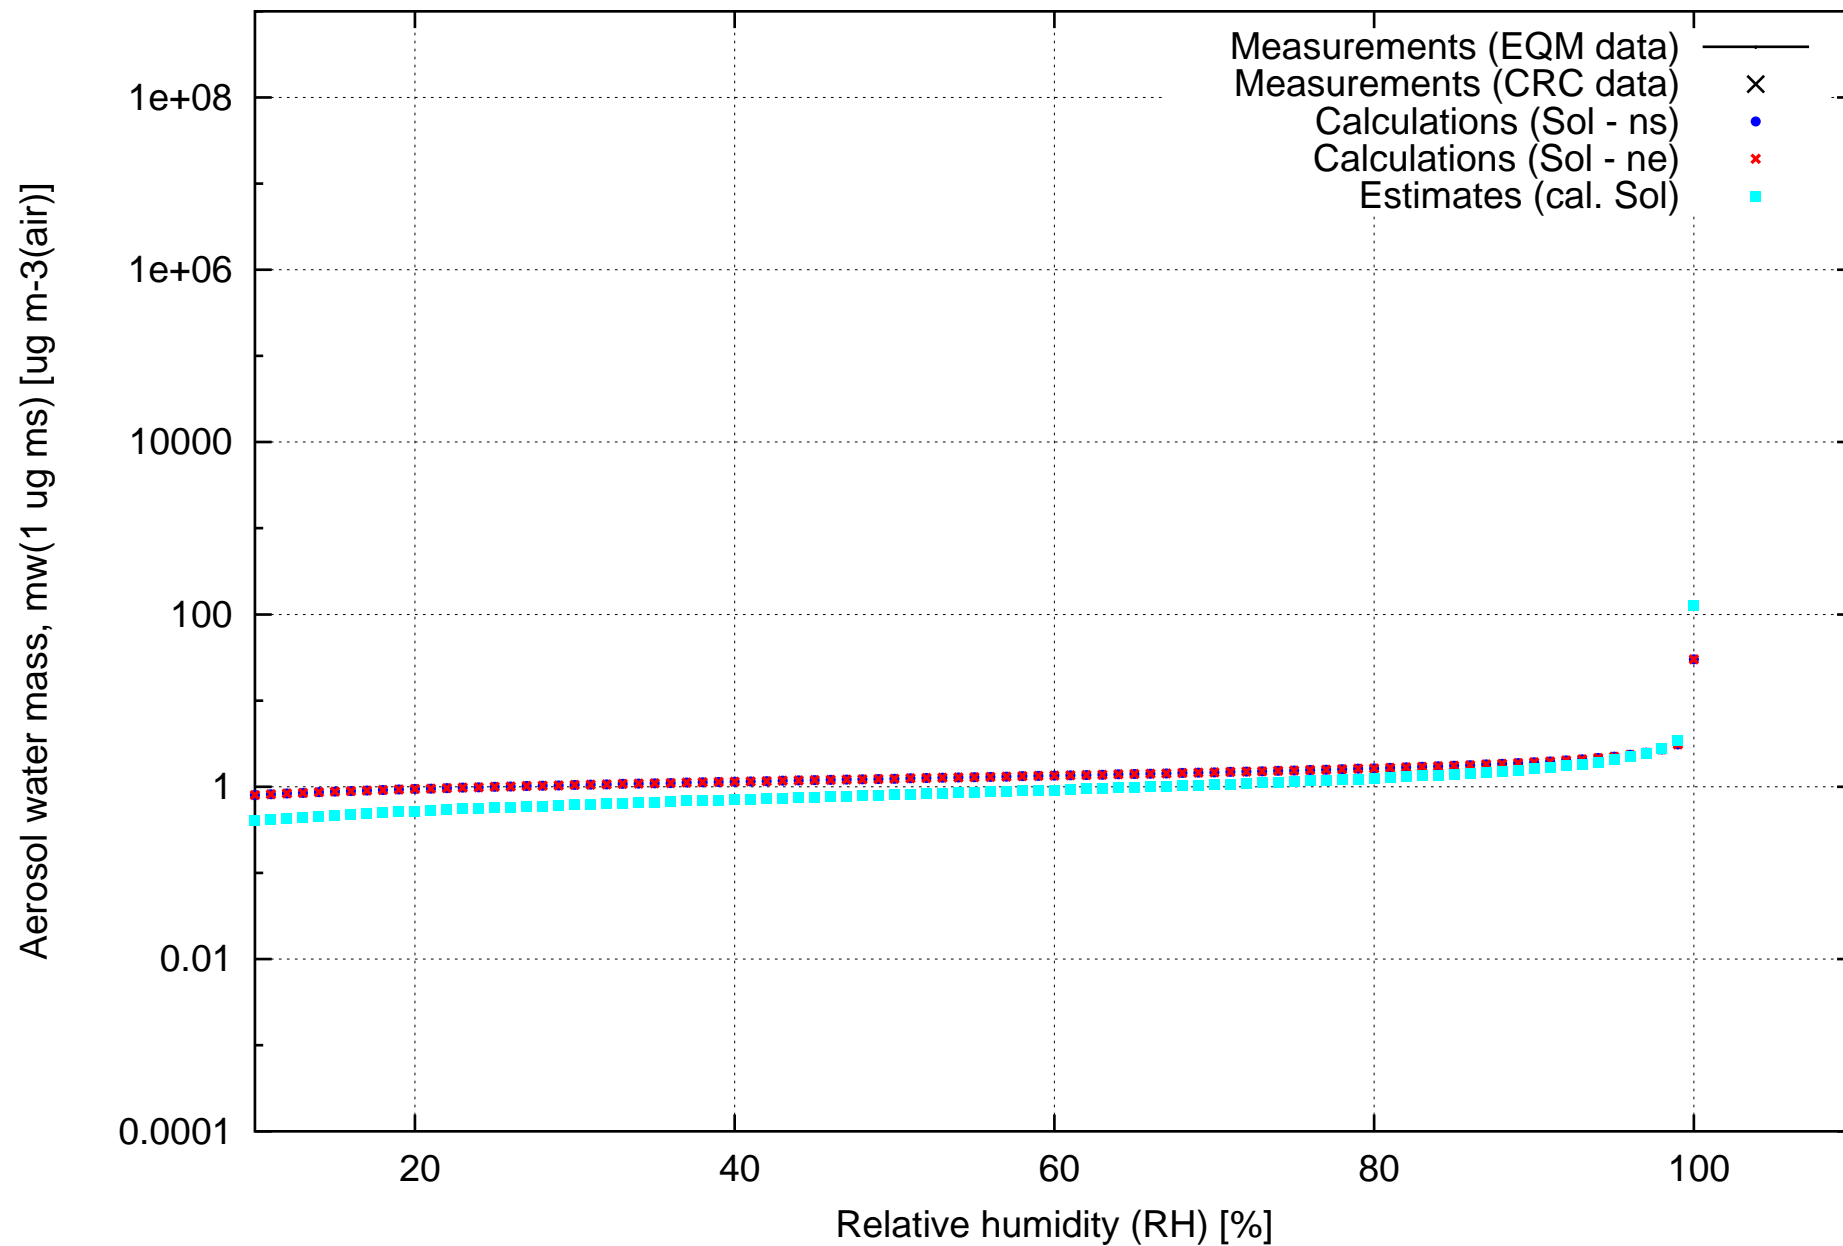

# Magnesium phosphate - $\text{Mg}_3(\text{PO}_4)_2$

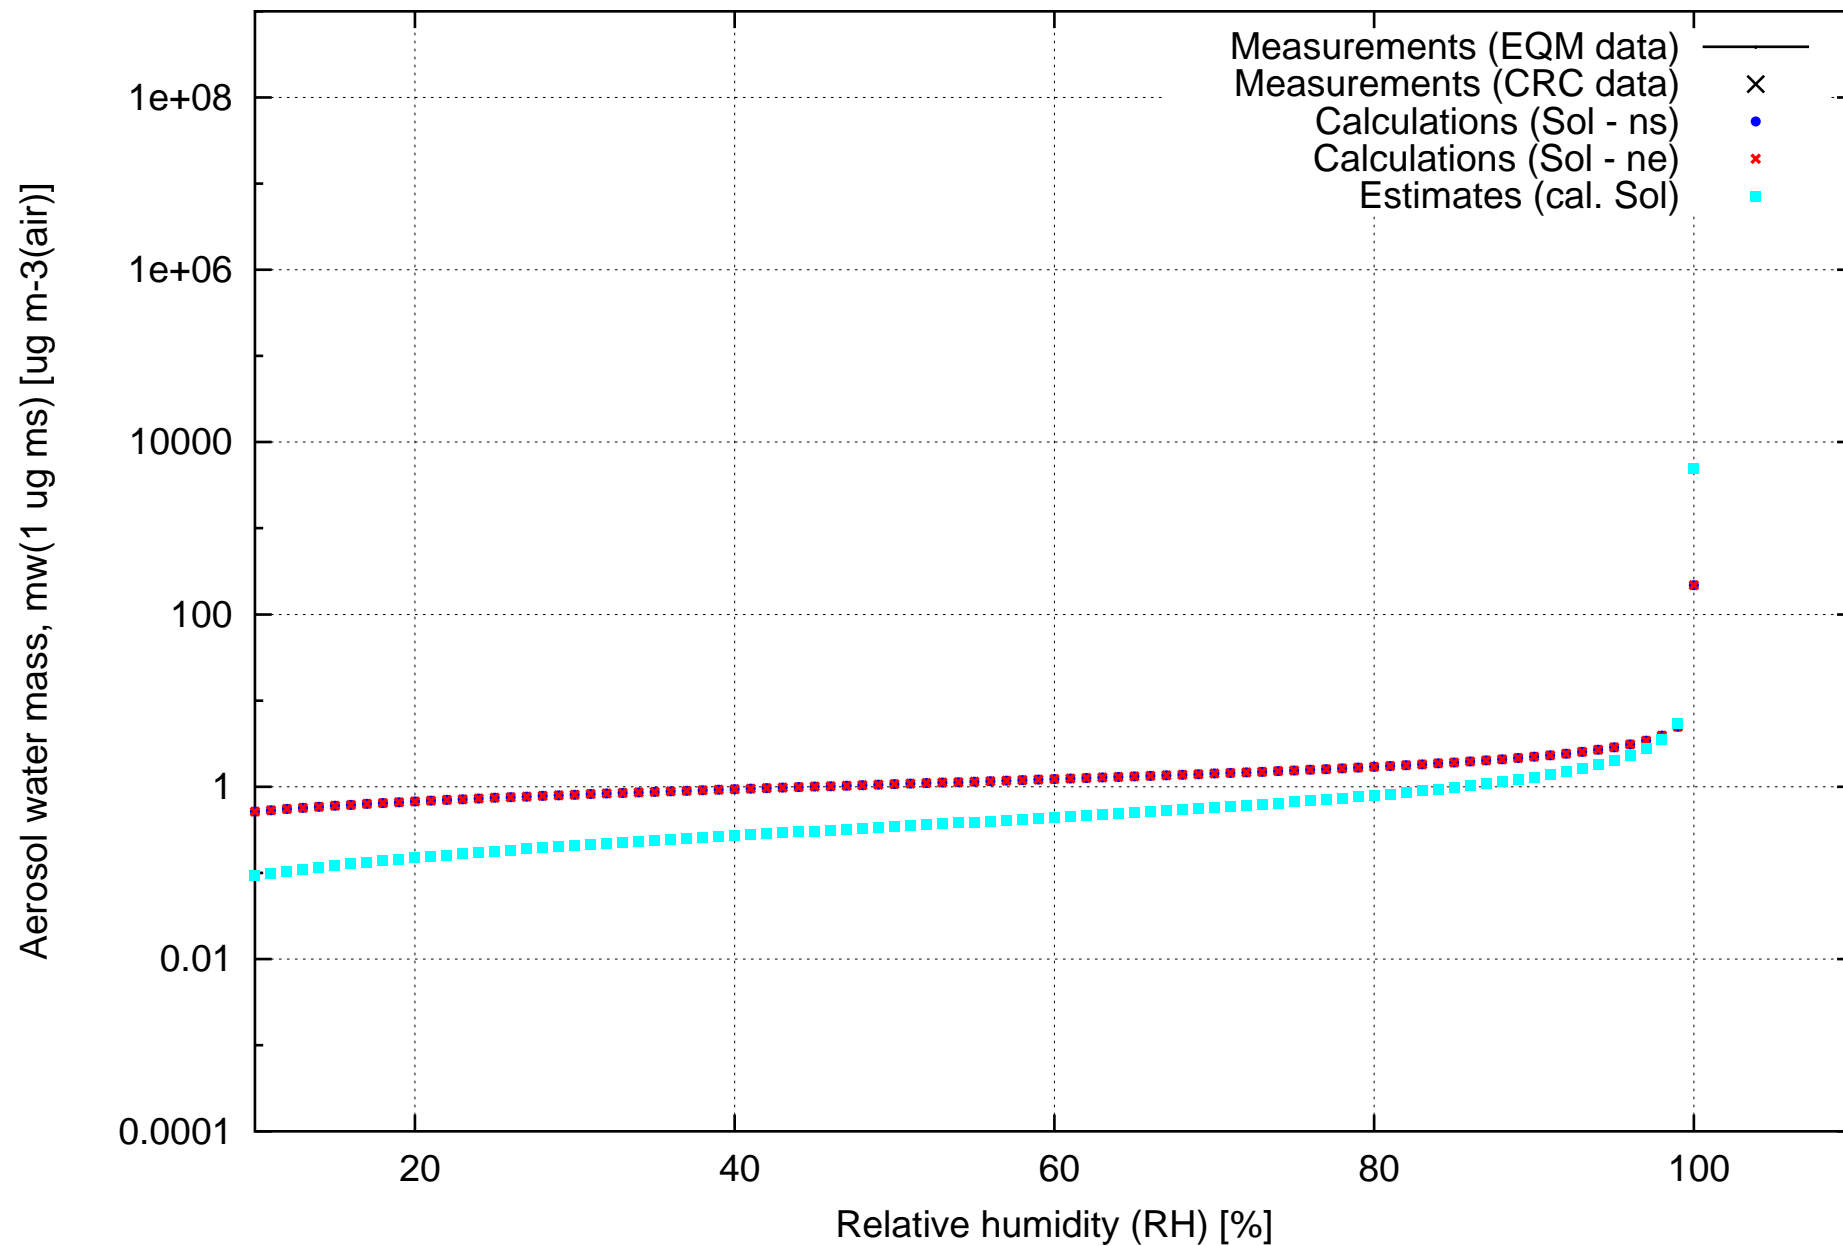

# Magnesium sulfate - MgSO<sub>4</sub>

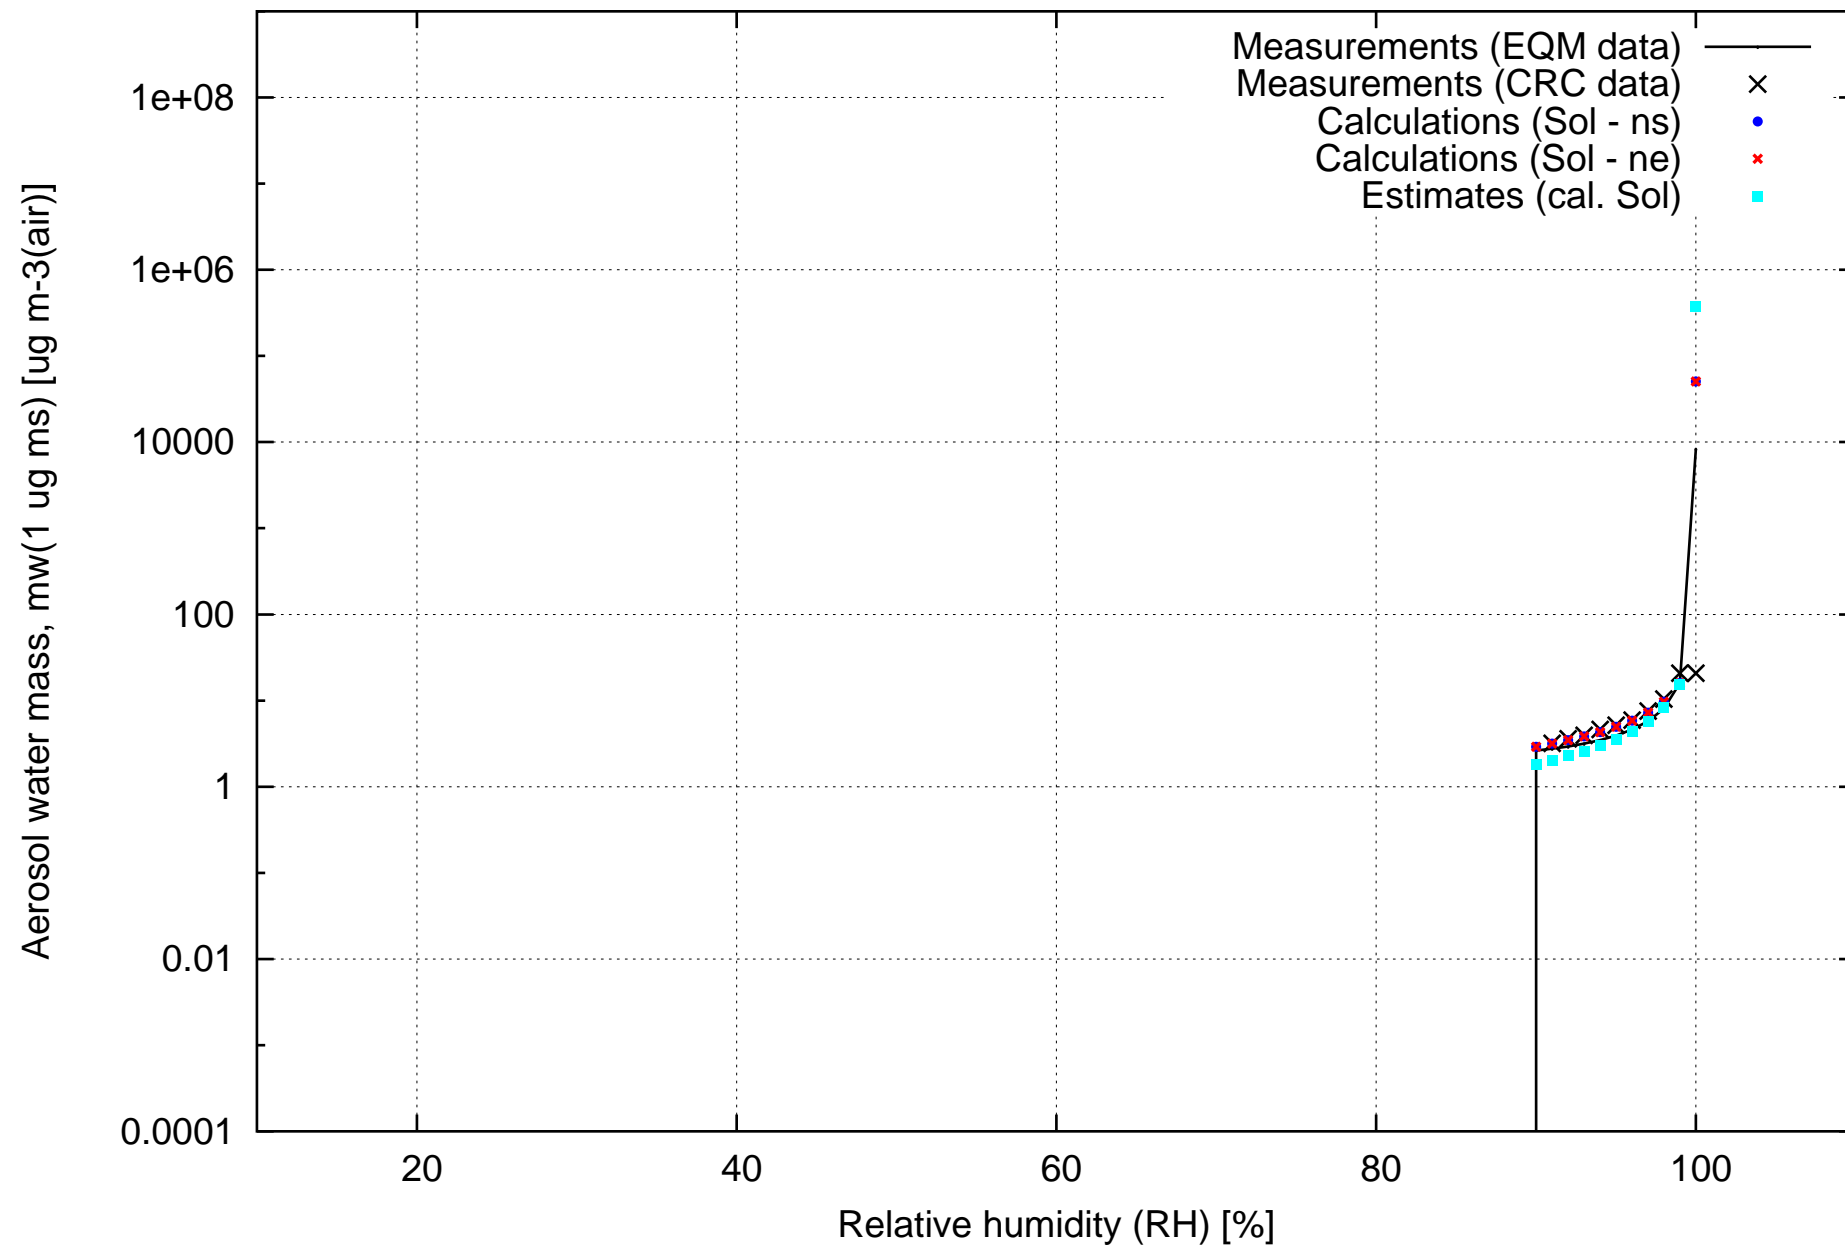



# Magnesium - dummy 03



# Magnesium nitrate - $\text{Mg}(\text{NO}_3)_2$

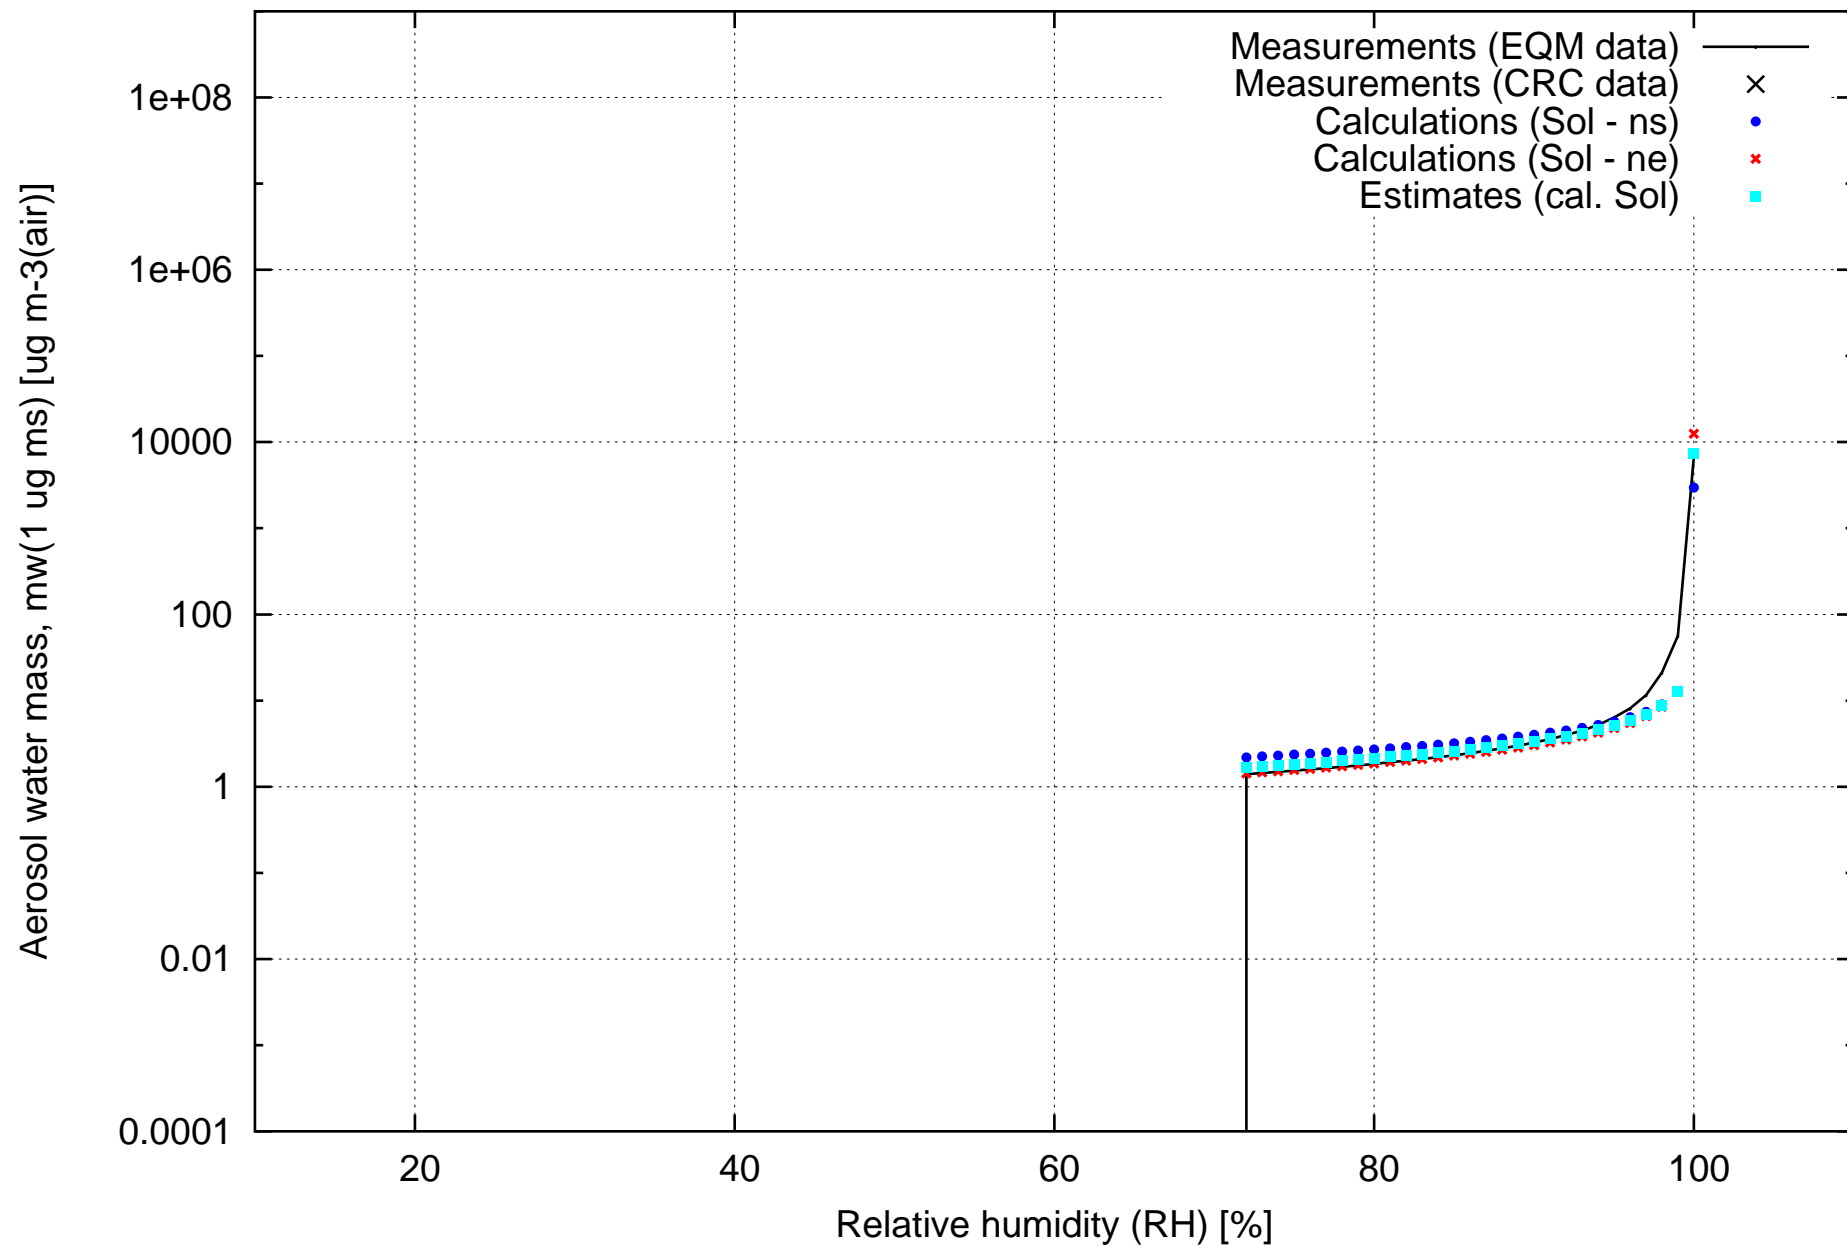

# Magnesium chloride - $\text{MgCl}_2$

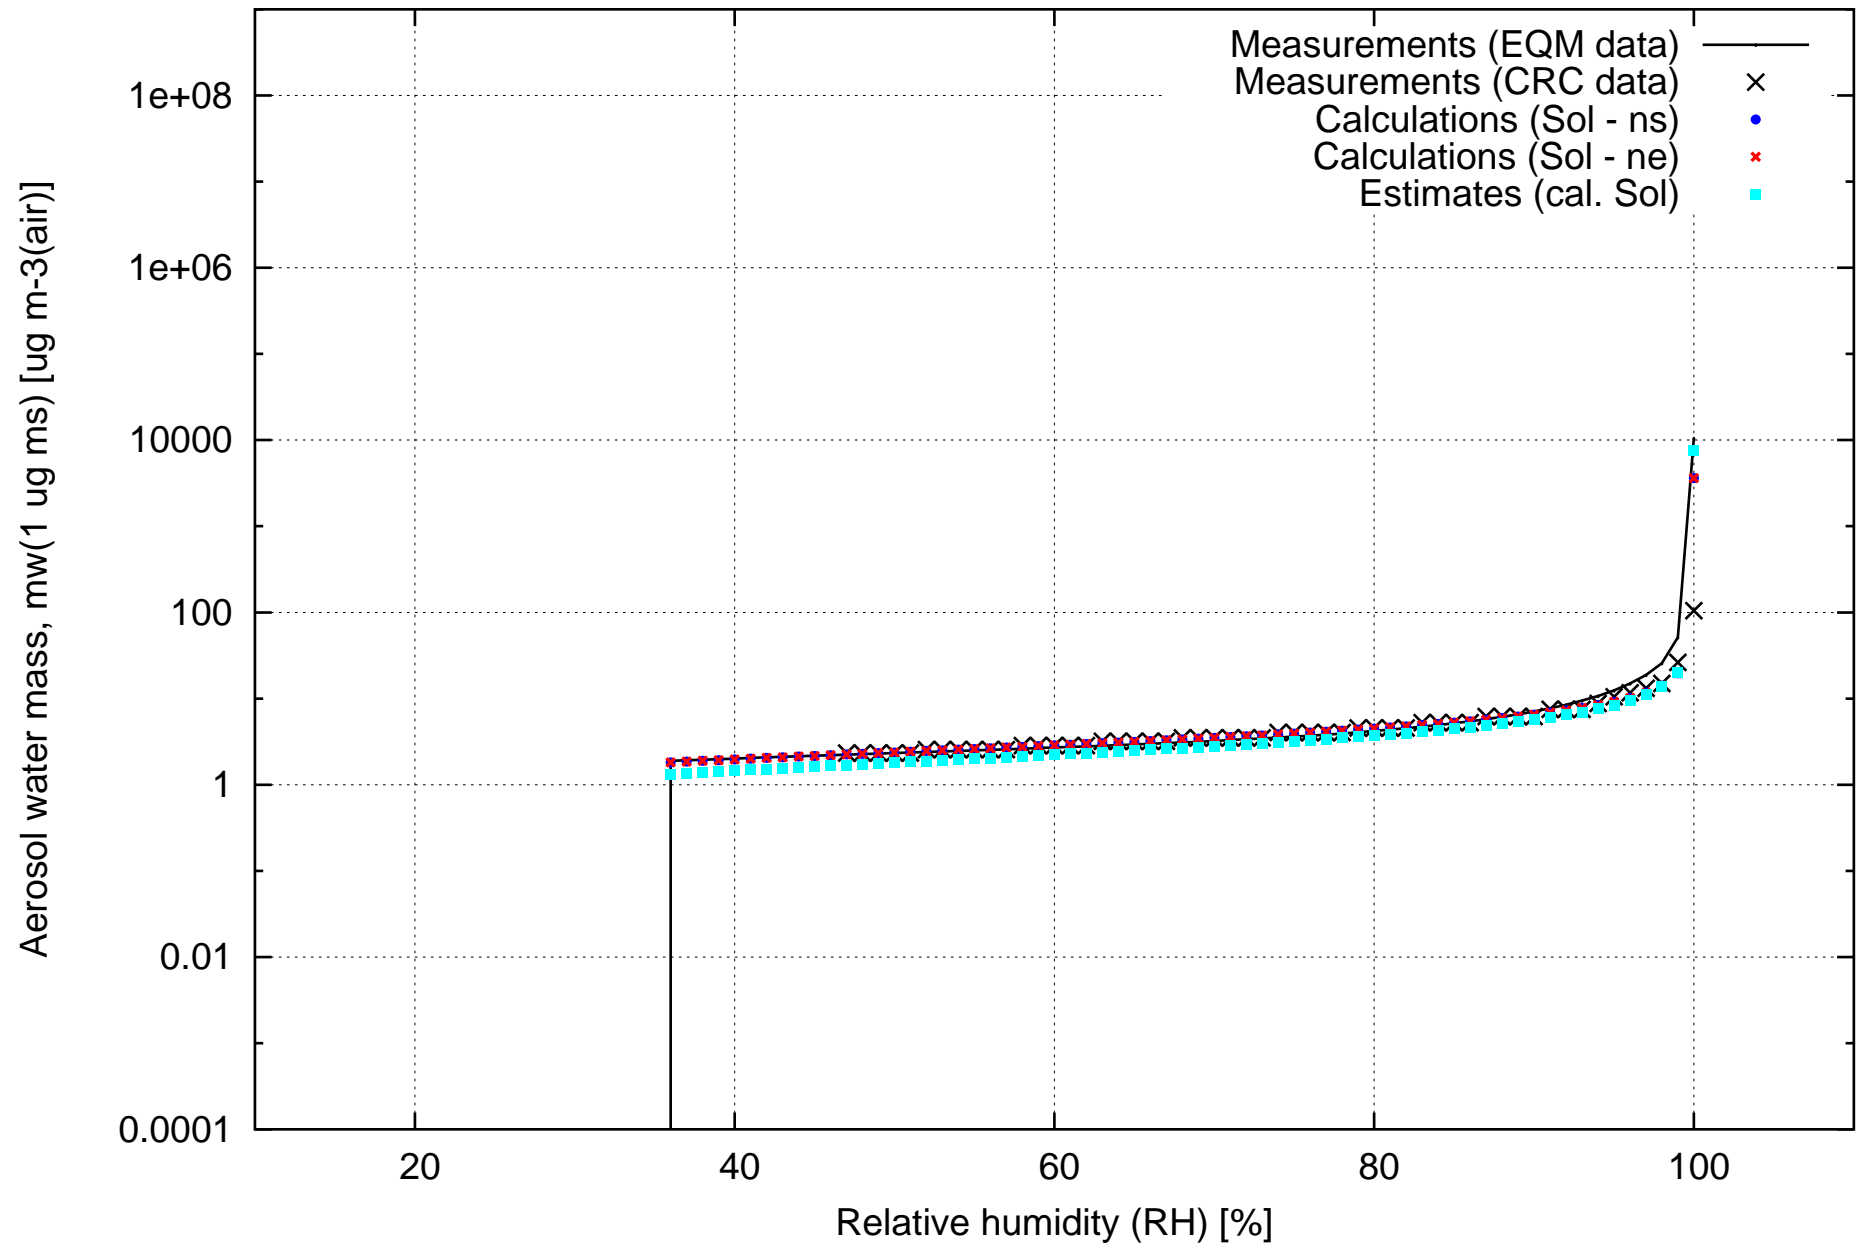

# Magnesium bromide - MgBr<sub>2</sub>

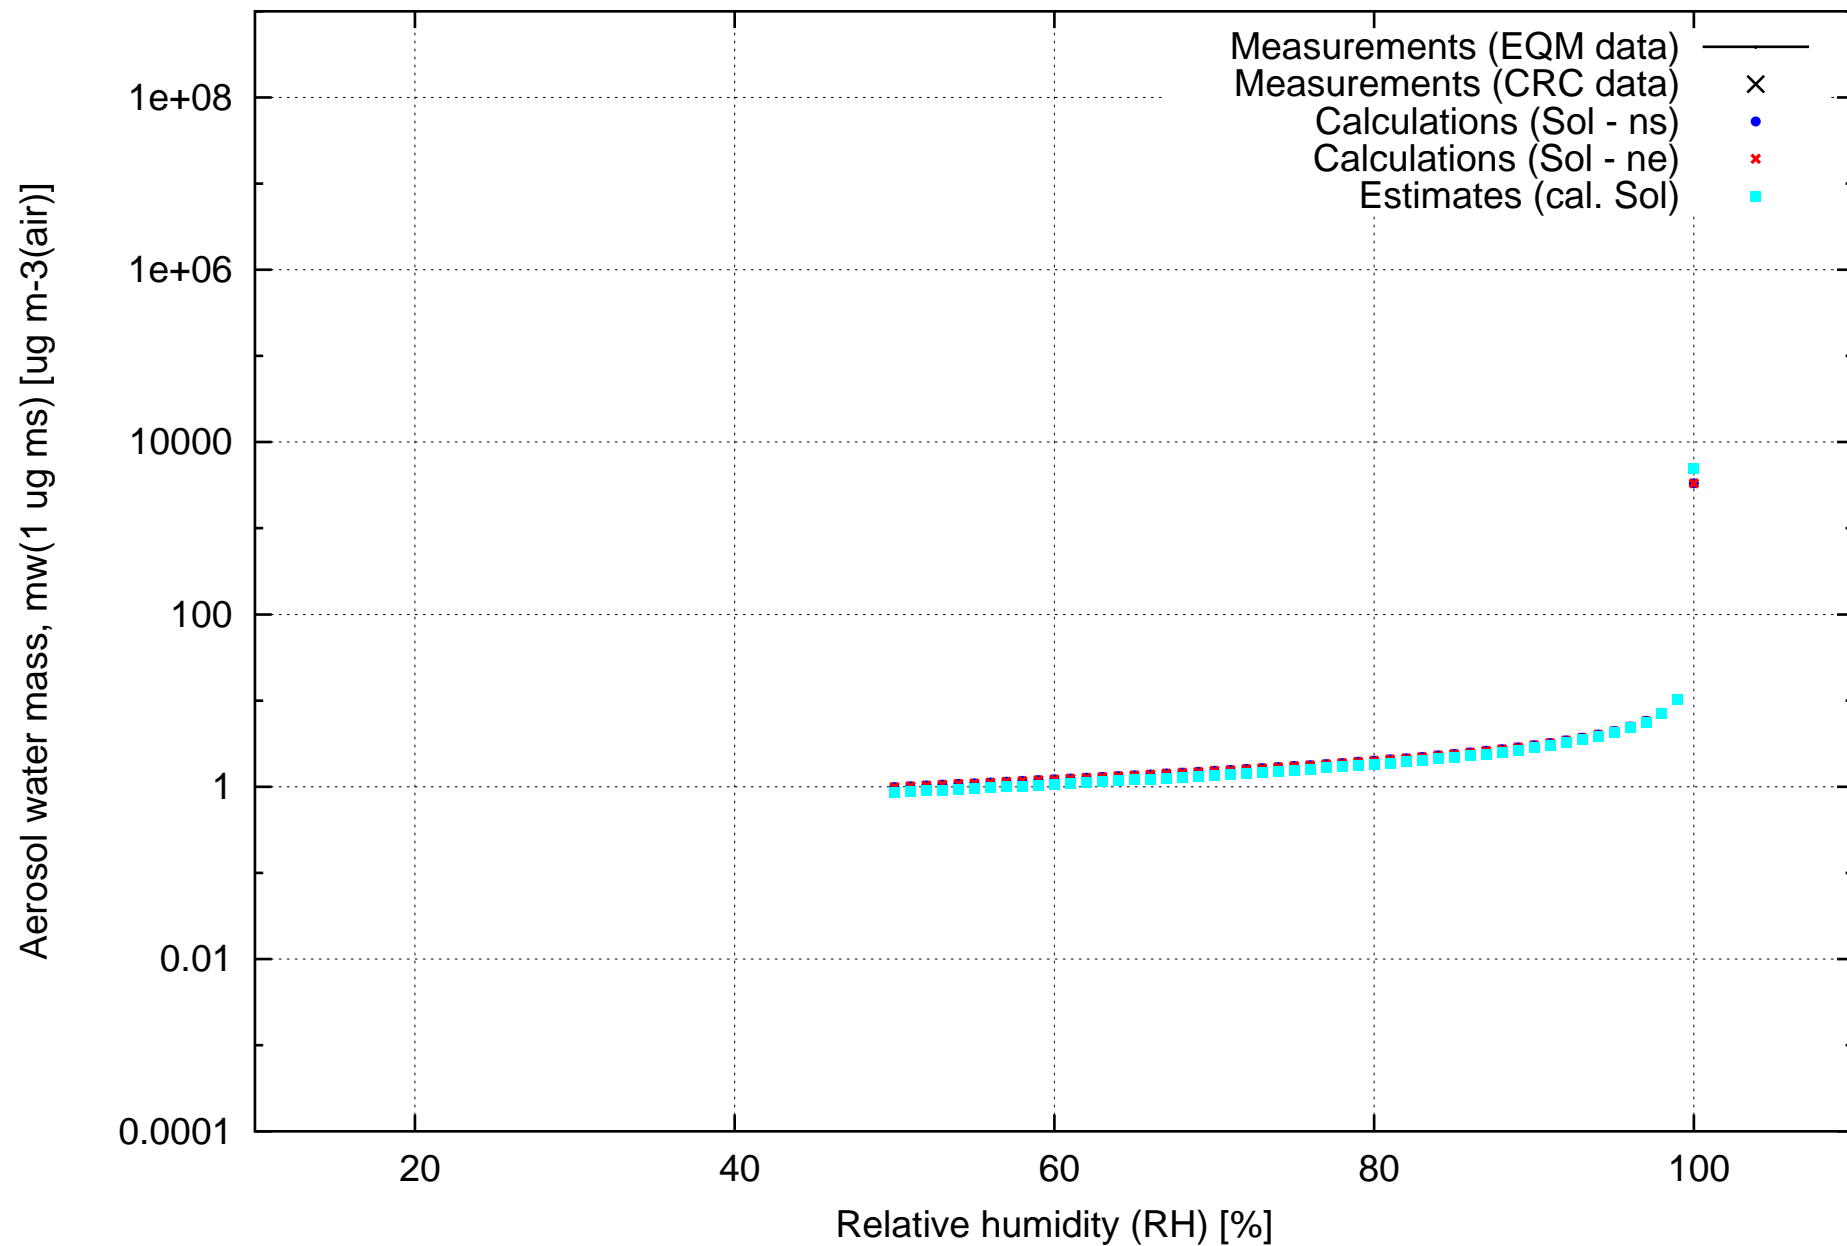

# Magnesium iodide - MgI2

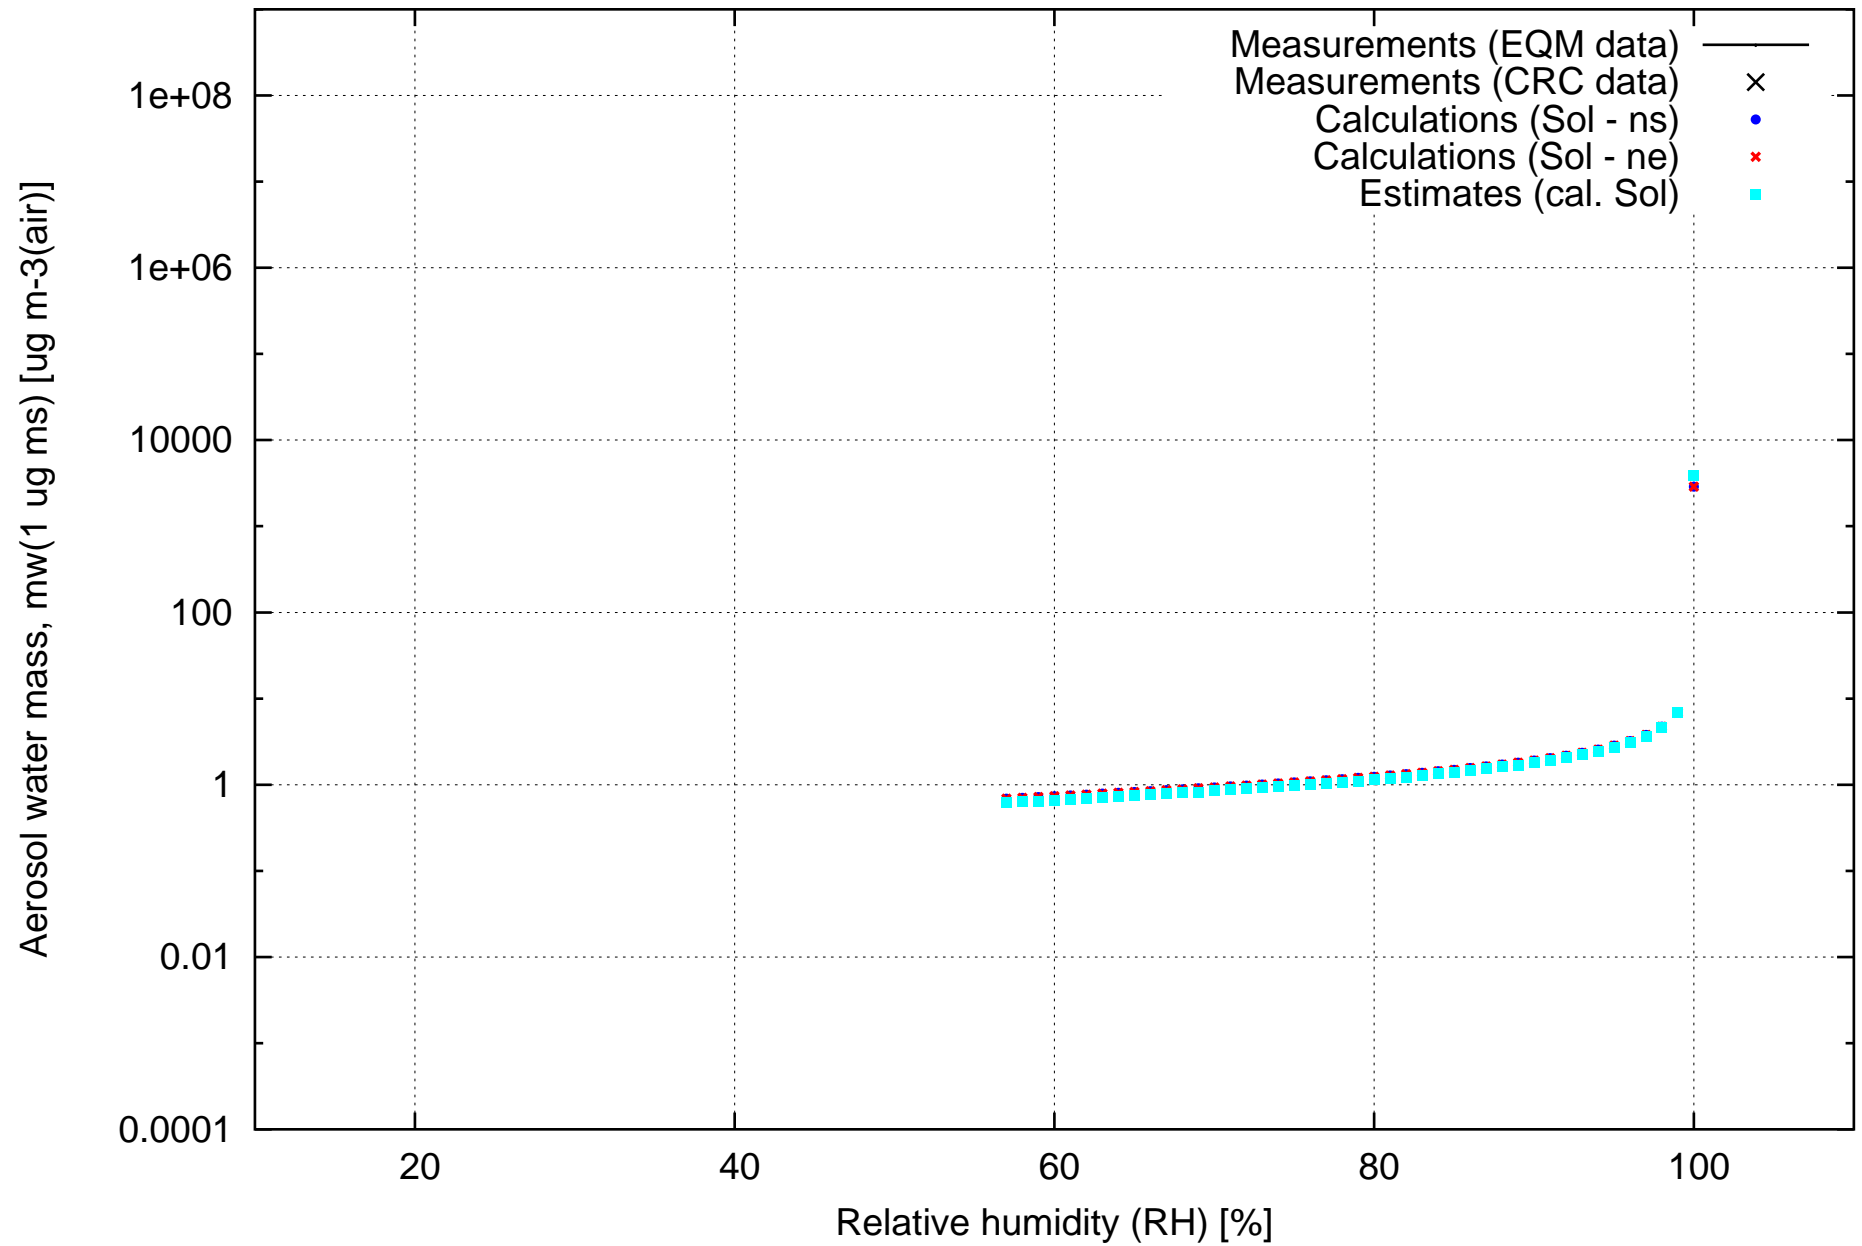

# Magnesium carbonate - $\text{MgCO}_3$

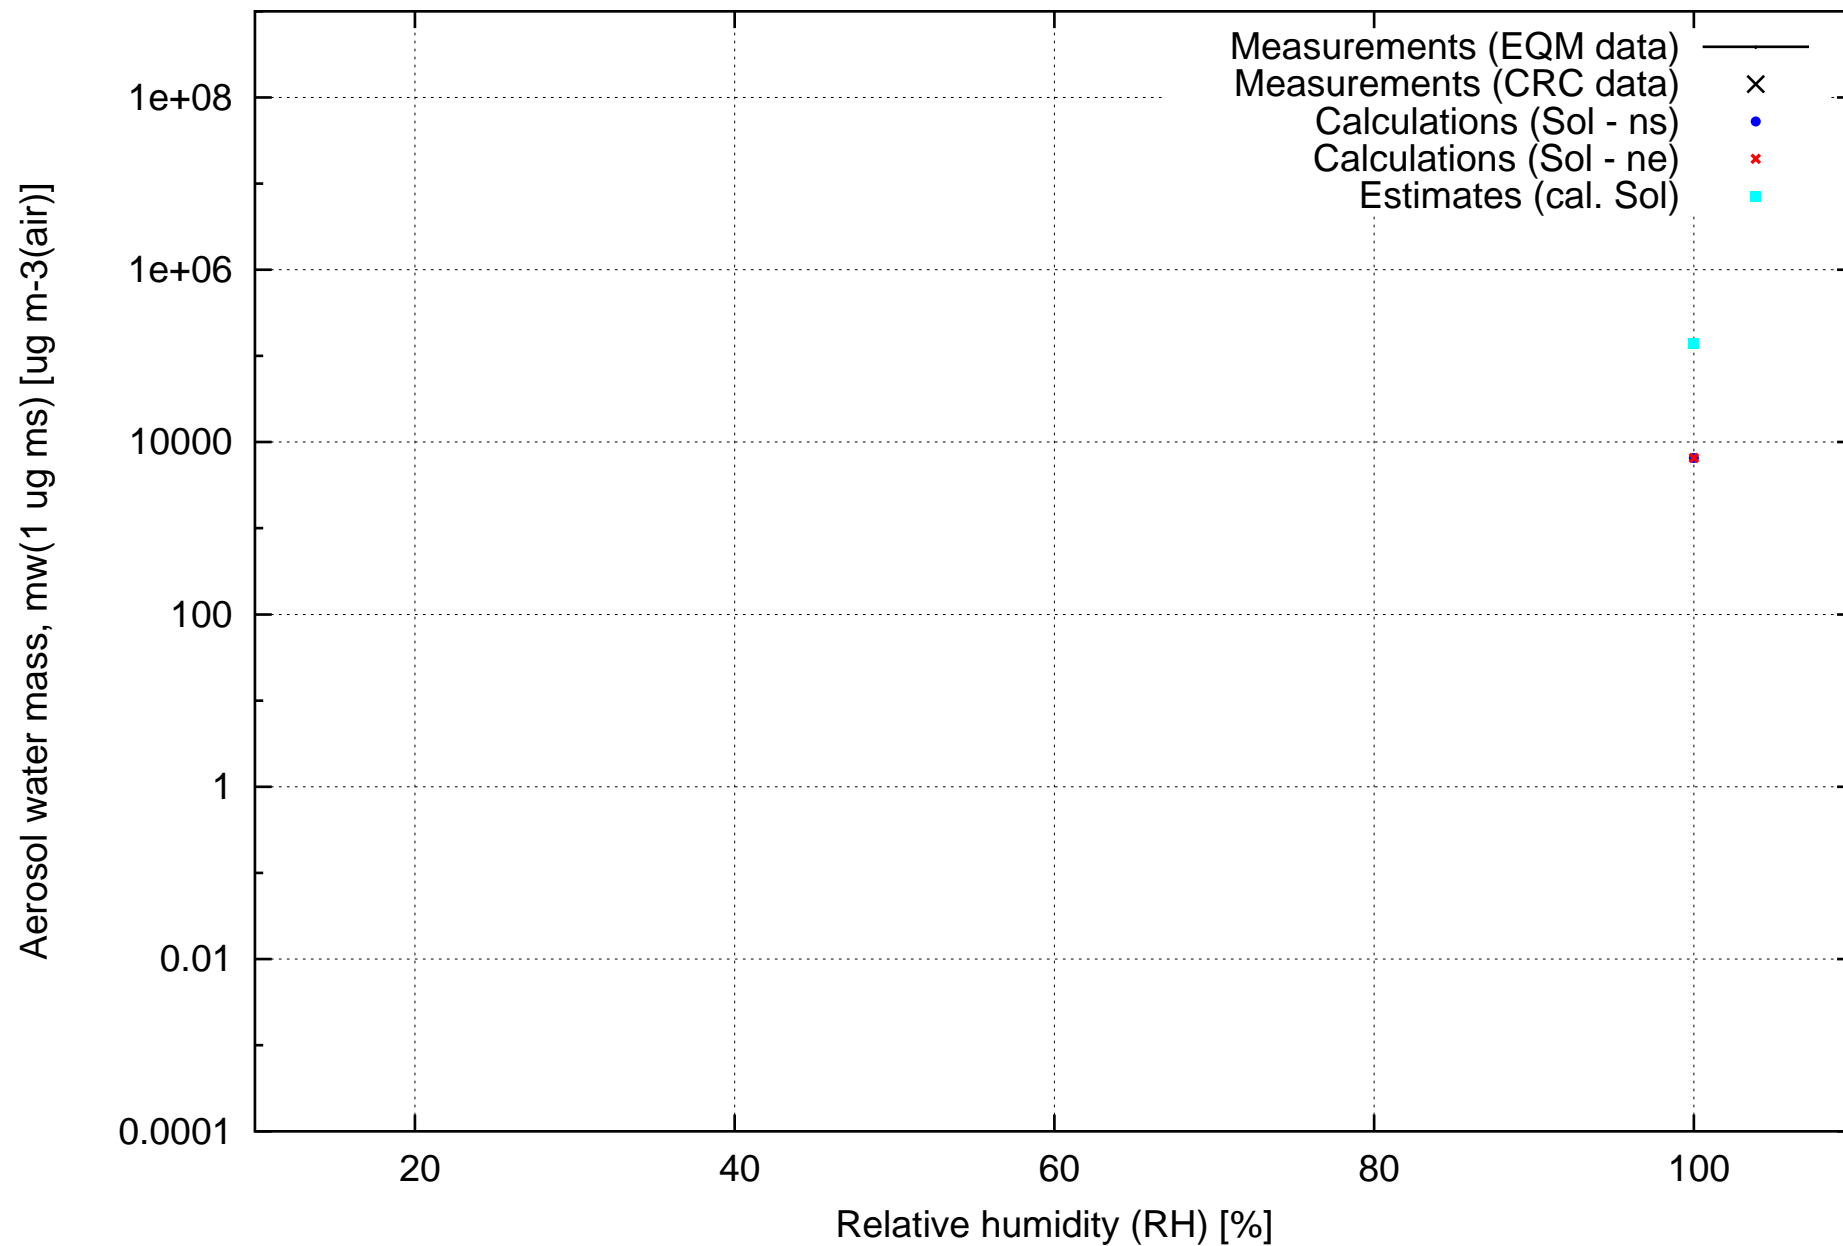

# Magnesium - dummy 09



# Magnesium hydroxide - Mg(OH)<sub>2</sub>





# Magnesium formate - $\text{Mg}(\text{CHO}_2)_2$

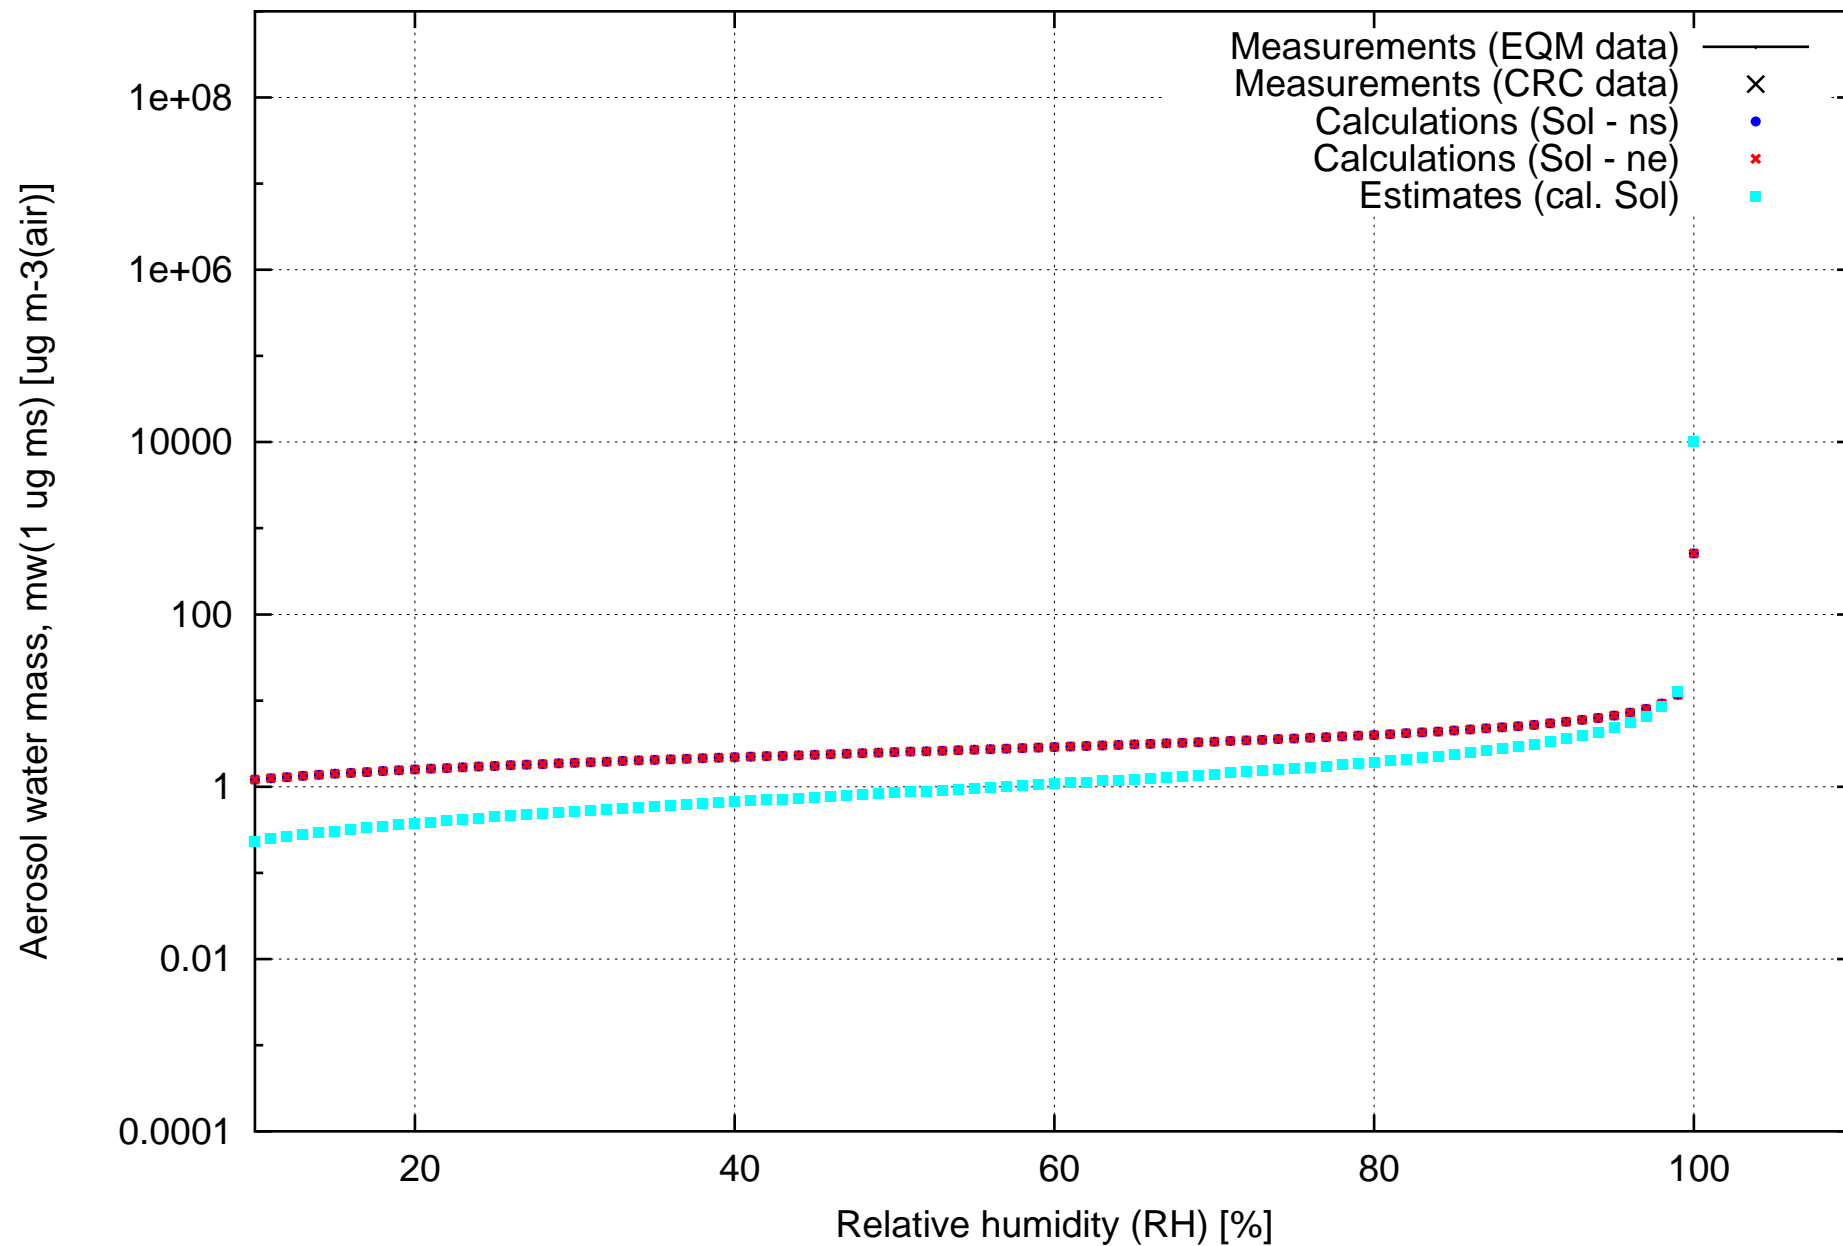

# Magnesium acetate - $\text{Mg}(\text{C}_2\text{H}_3\text{O}_2)_2$

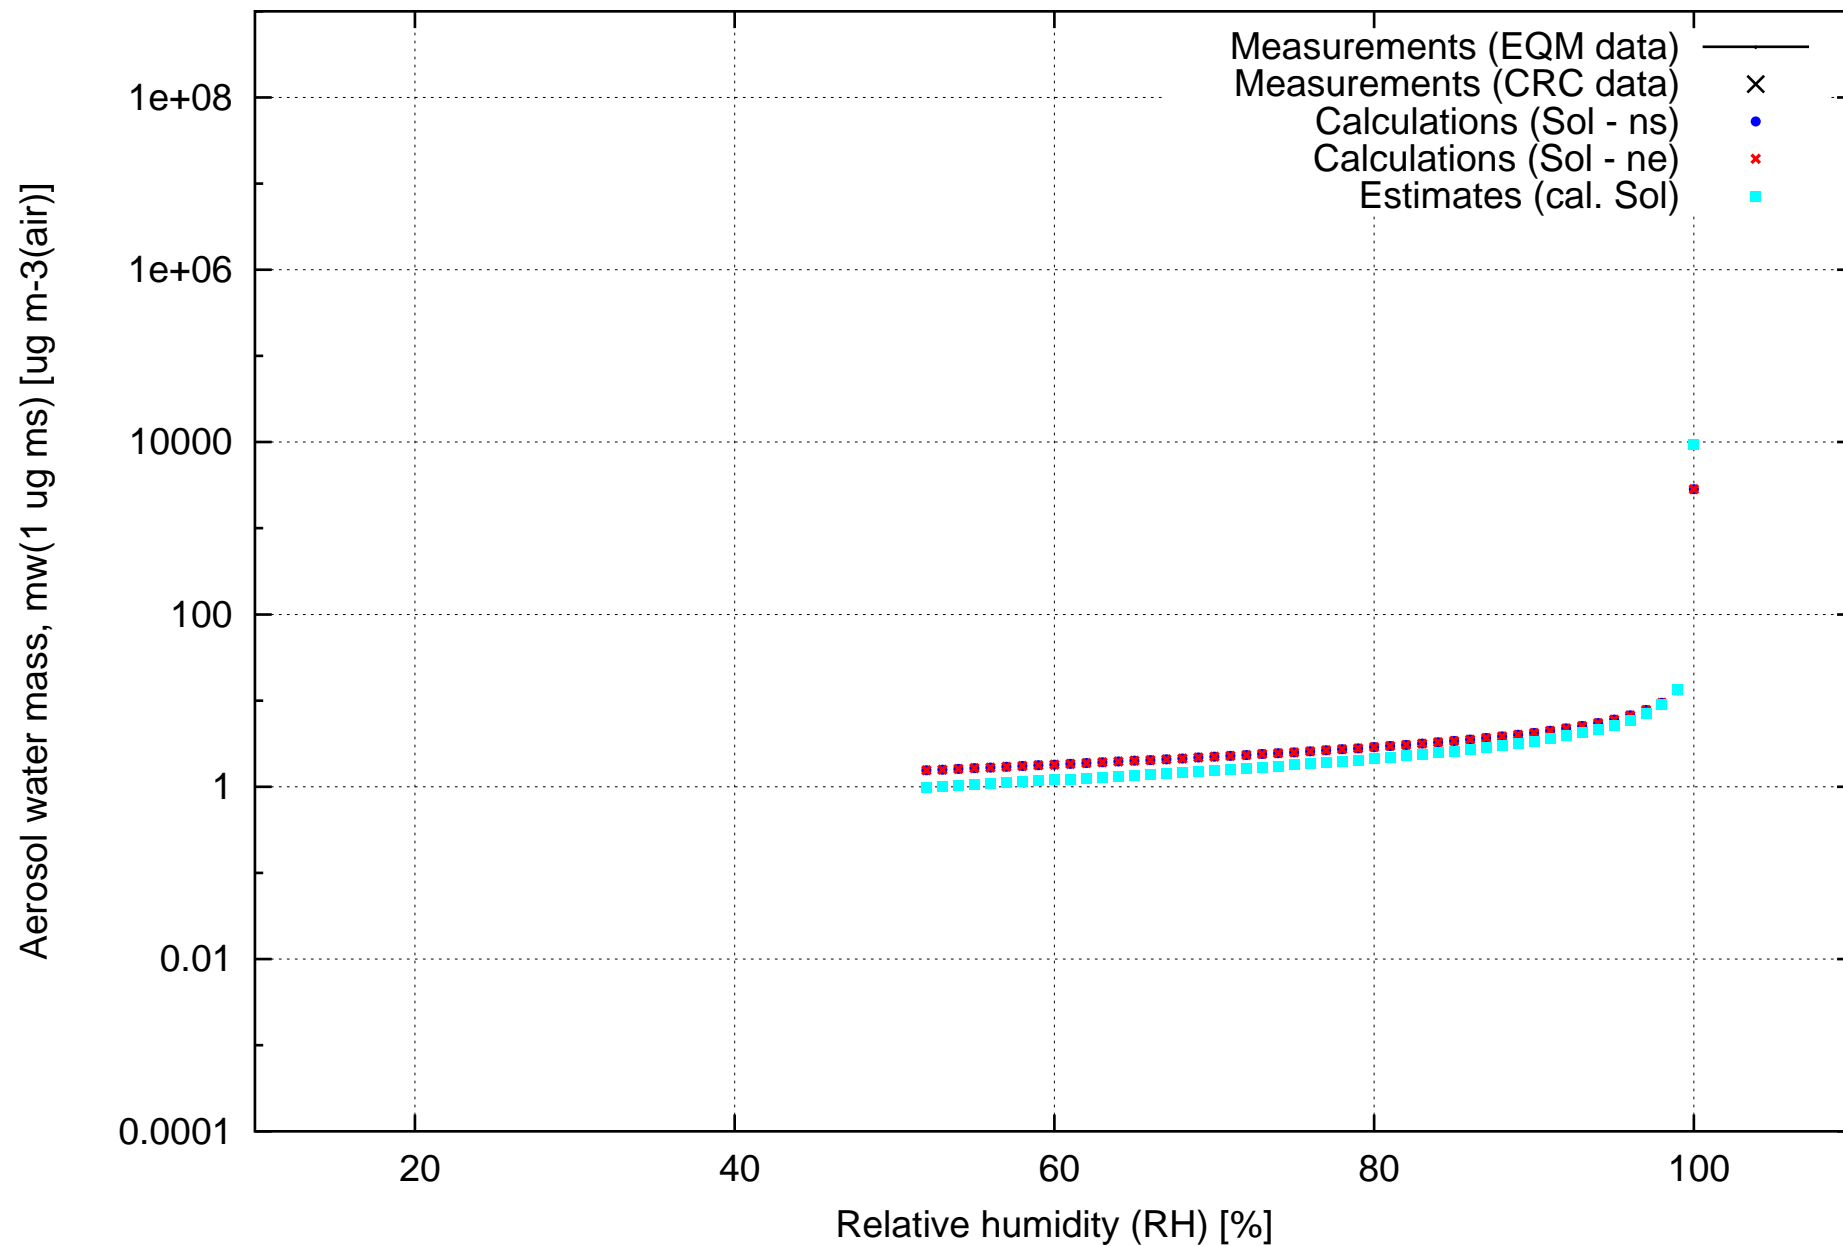

# Magnesium oxalate - $\text{MgC}_2\text{O}_4$

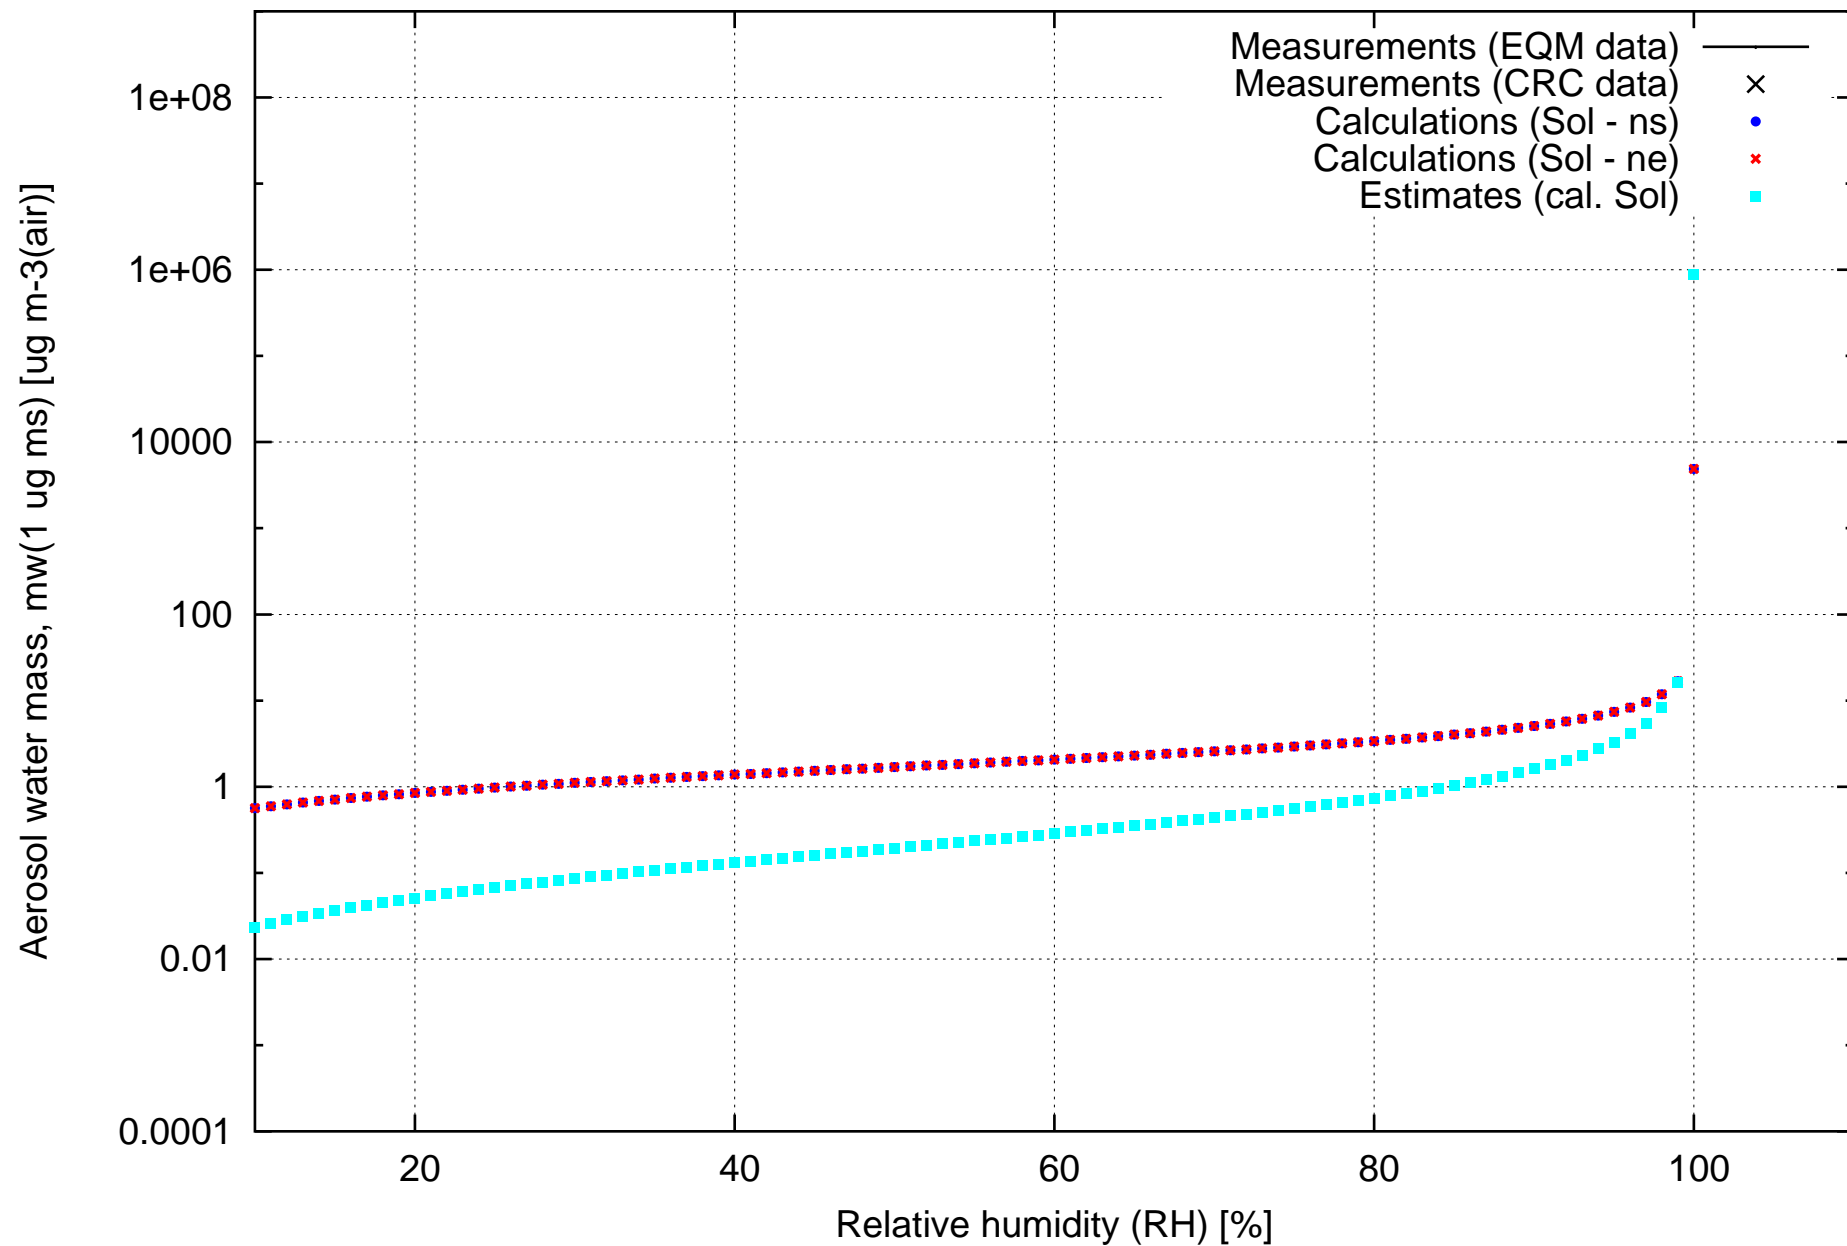

# Magnesium citrate - $\text{Mg}_3(\text{C}_6\text{H}_5\text{O}_7)_2$

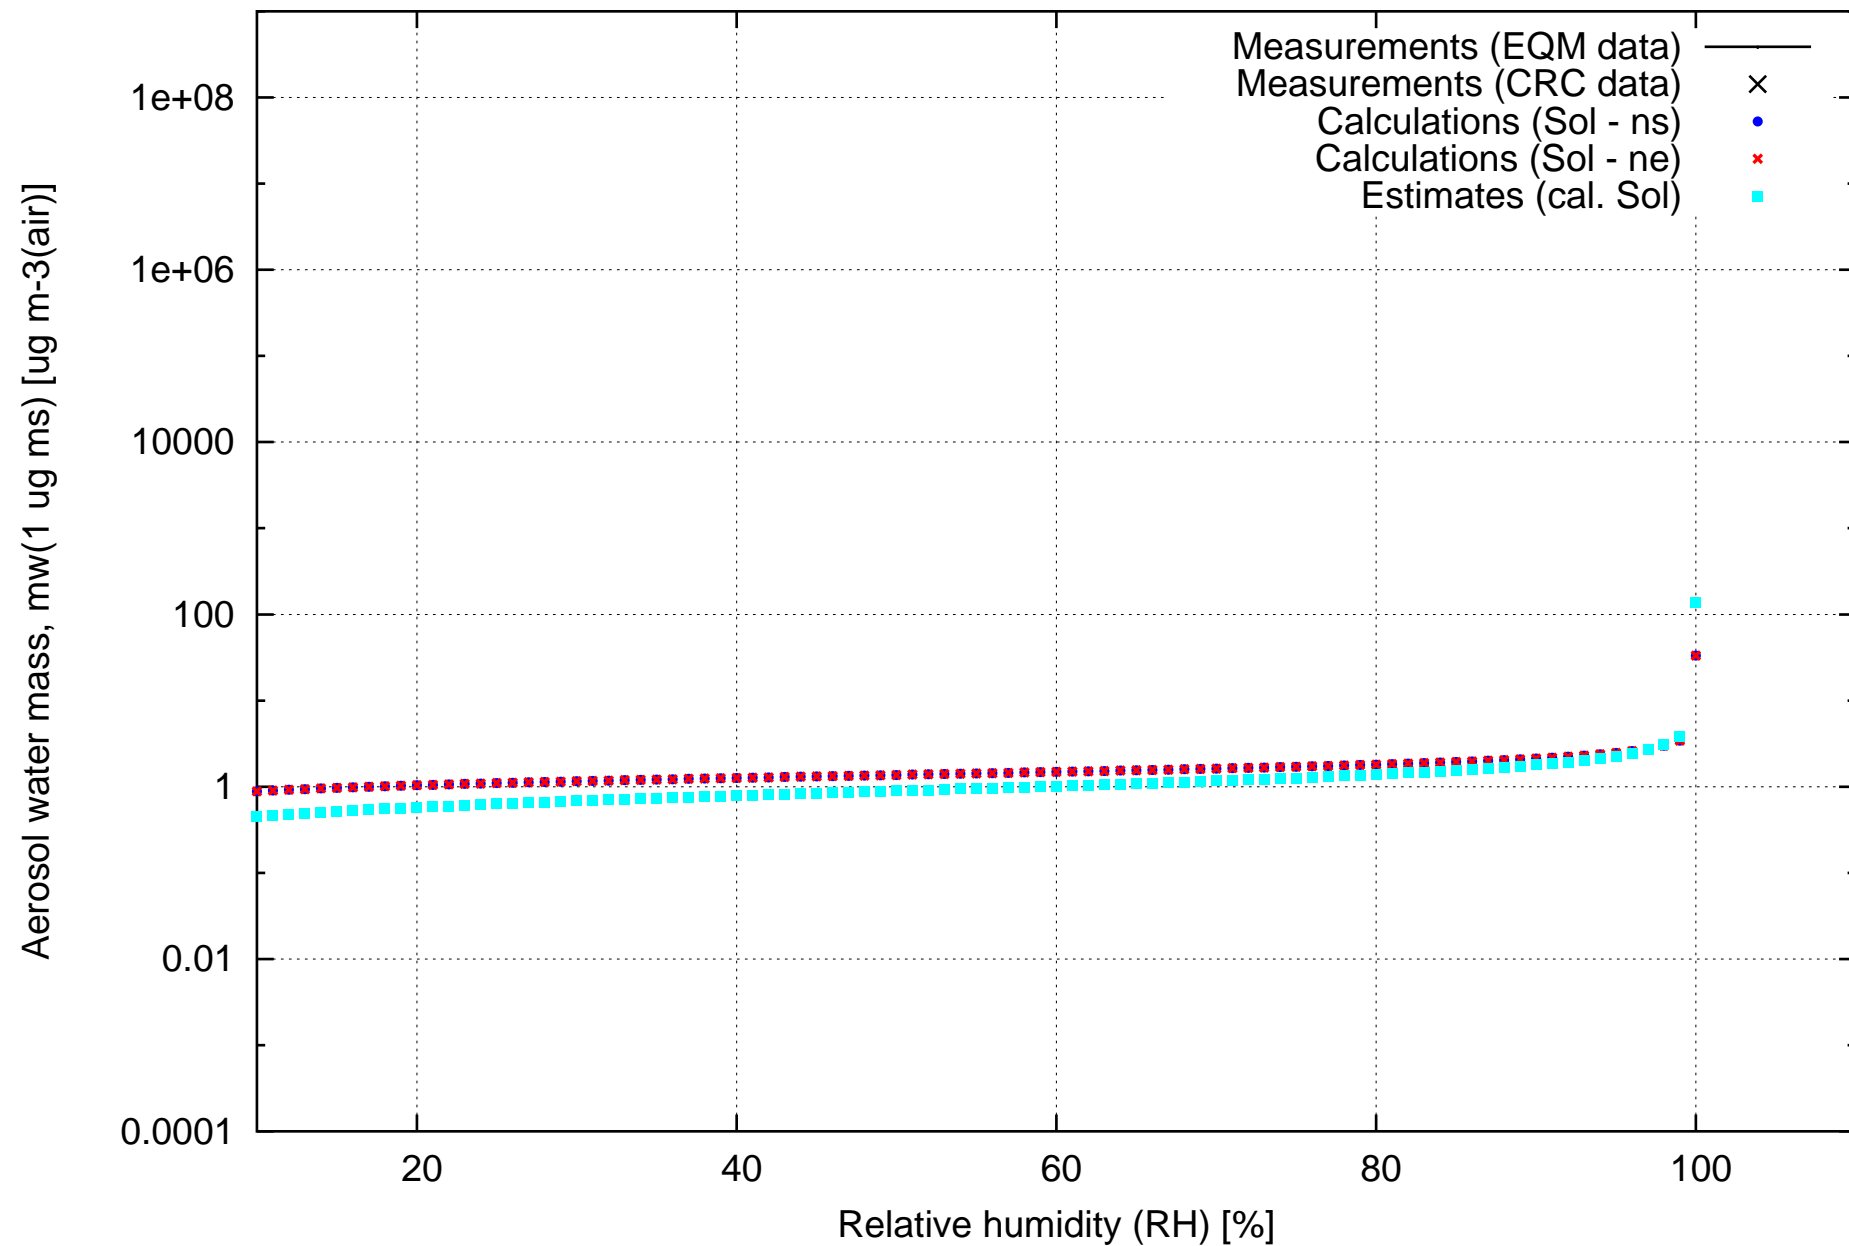

# Iron(III) phosphate - FePO4

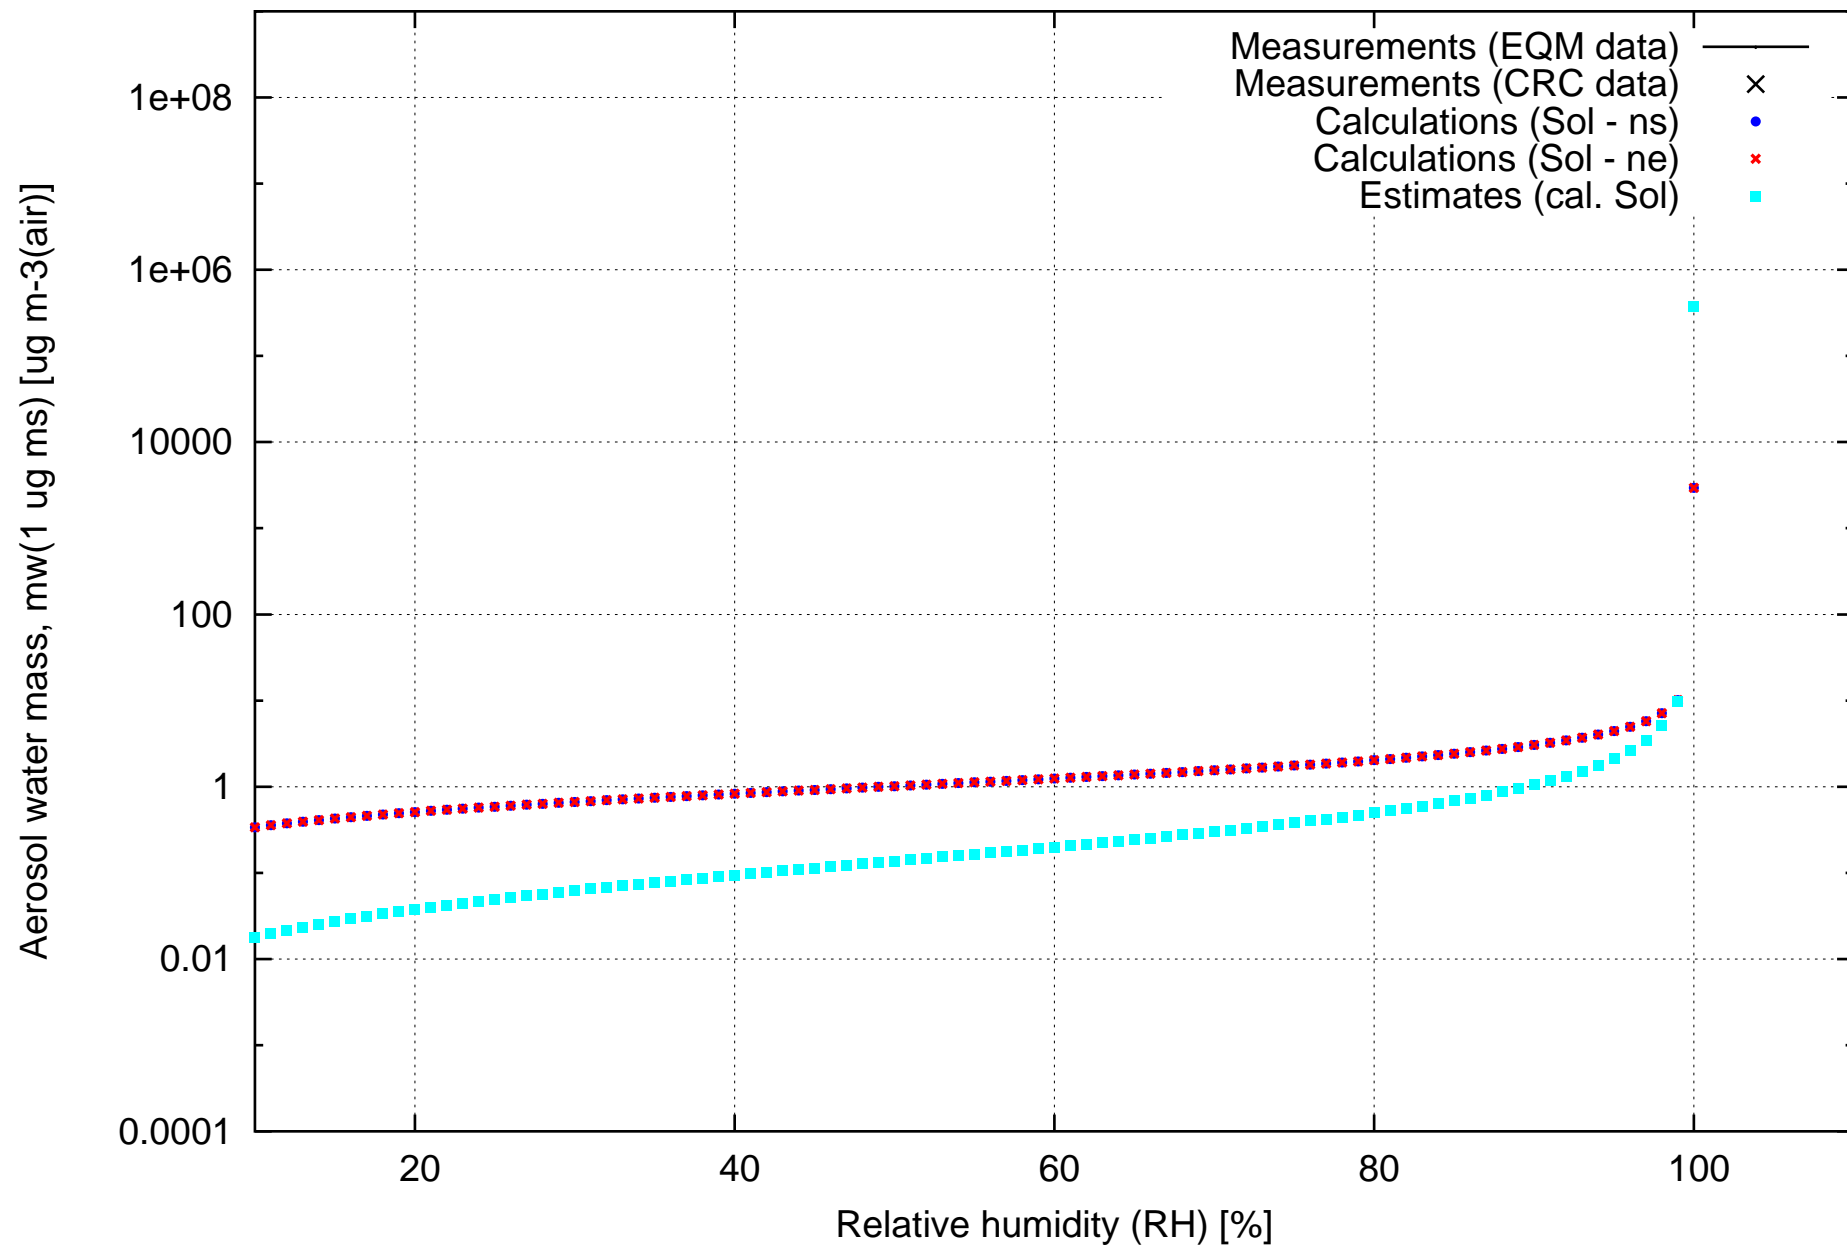

# Iron(III) sulfate - $\text{Fe}_2(\text{SO}_4)_3$

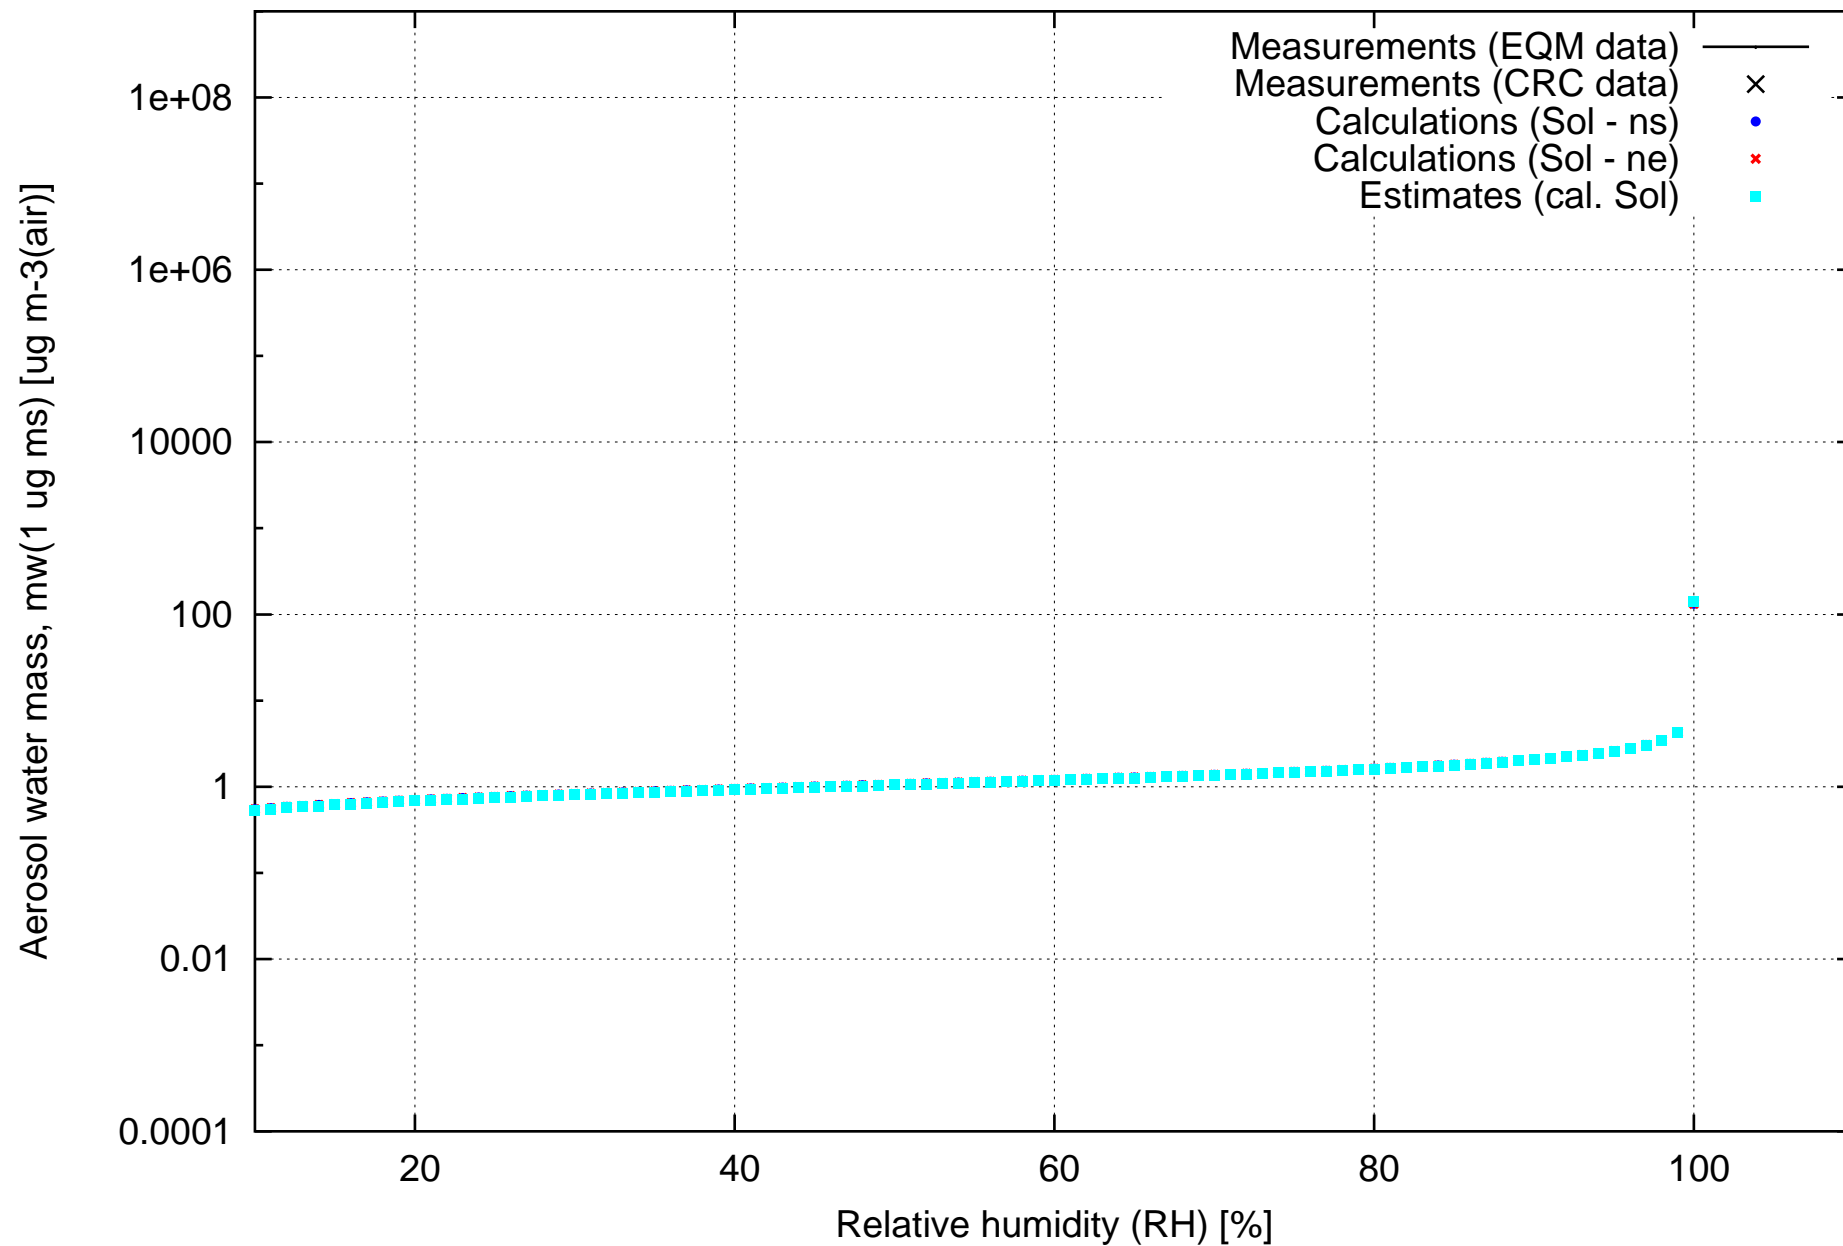

# Iron(III) - dummy 03



# Iron(III) nitrate - Fe(NO<sub>3</sub>)<sub>3</sub>

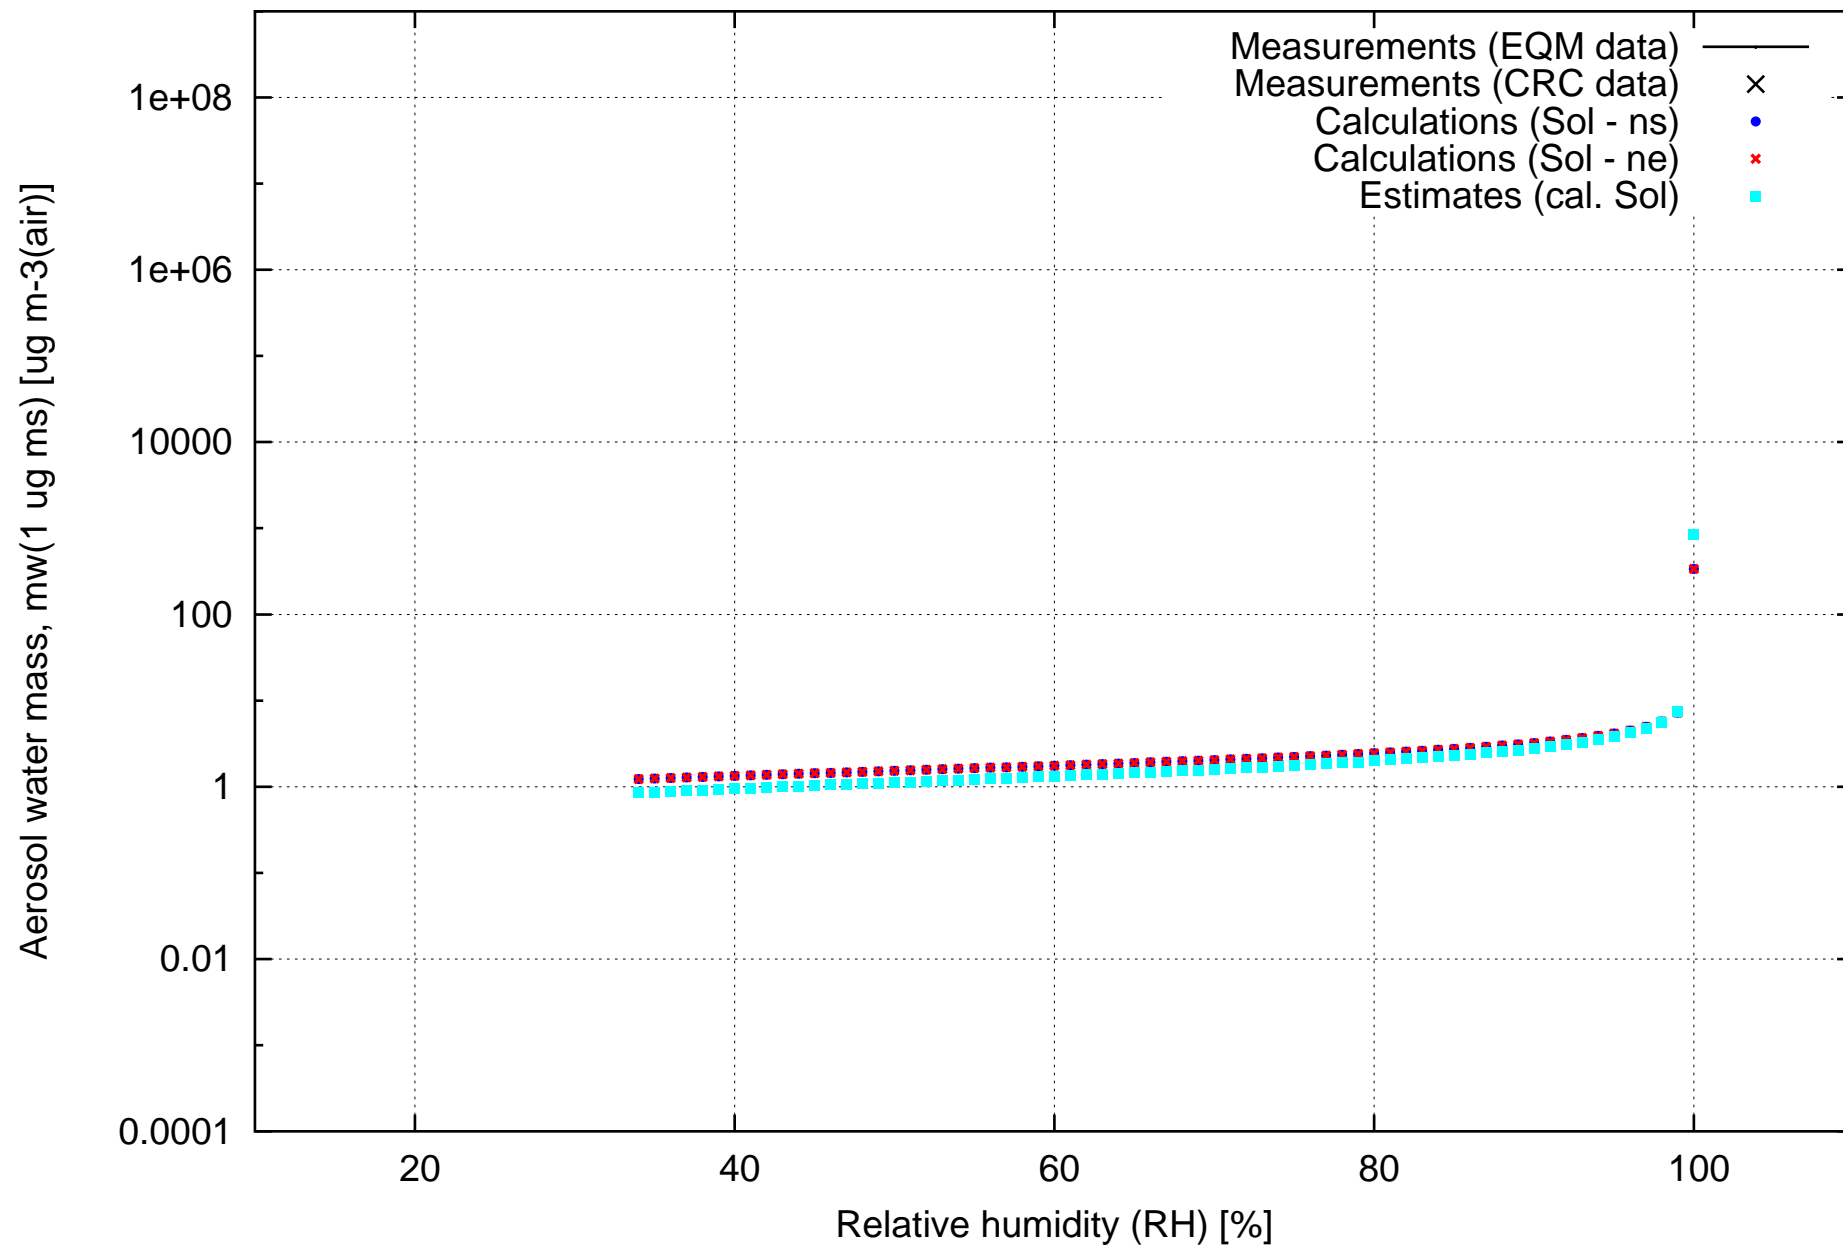



# Iron(III) chloride - FeCl3

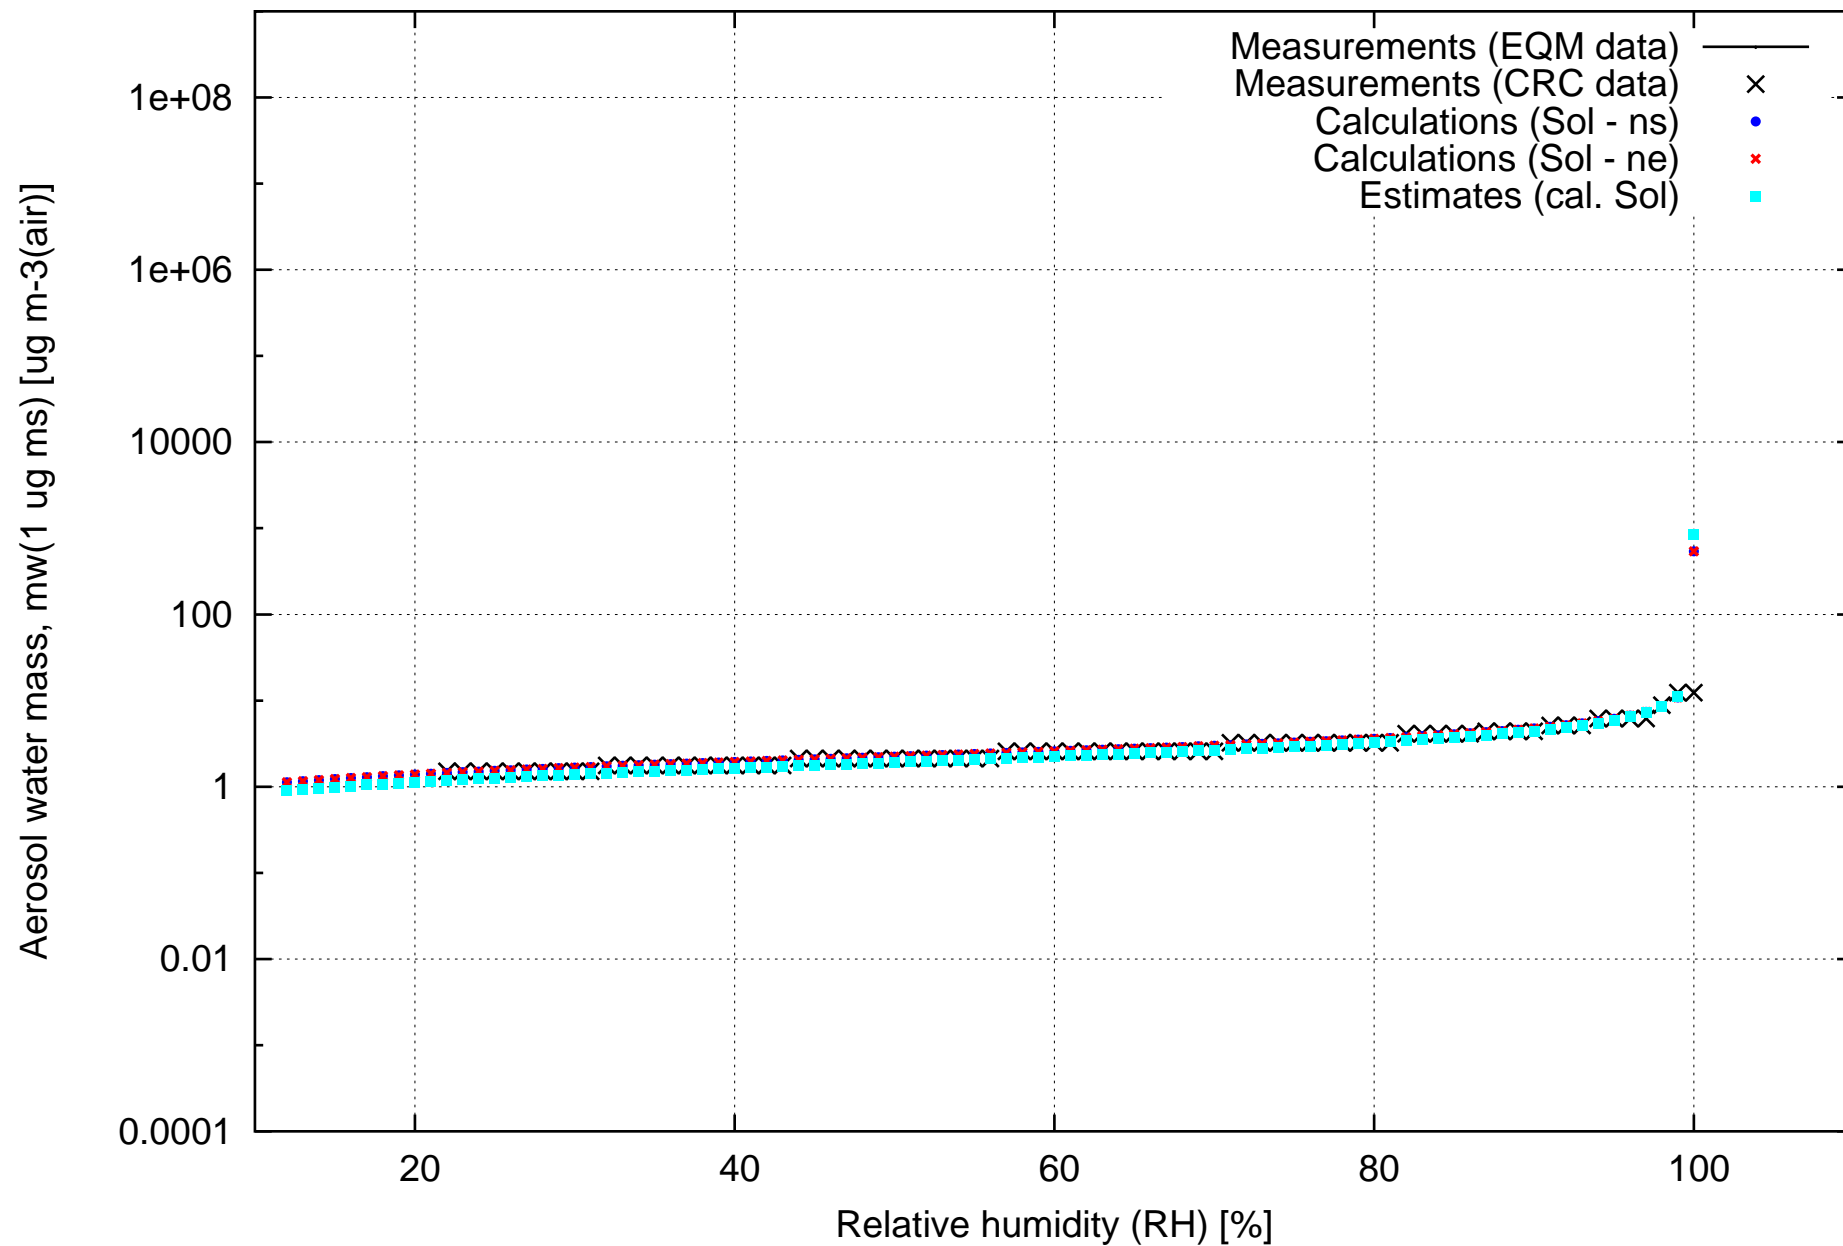

# Iron(III) bromide - FeBr3

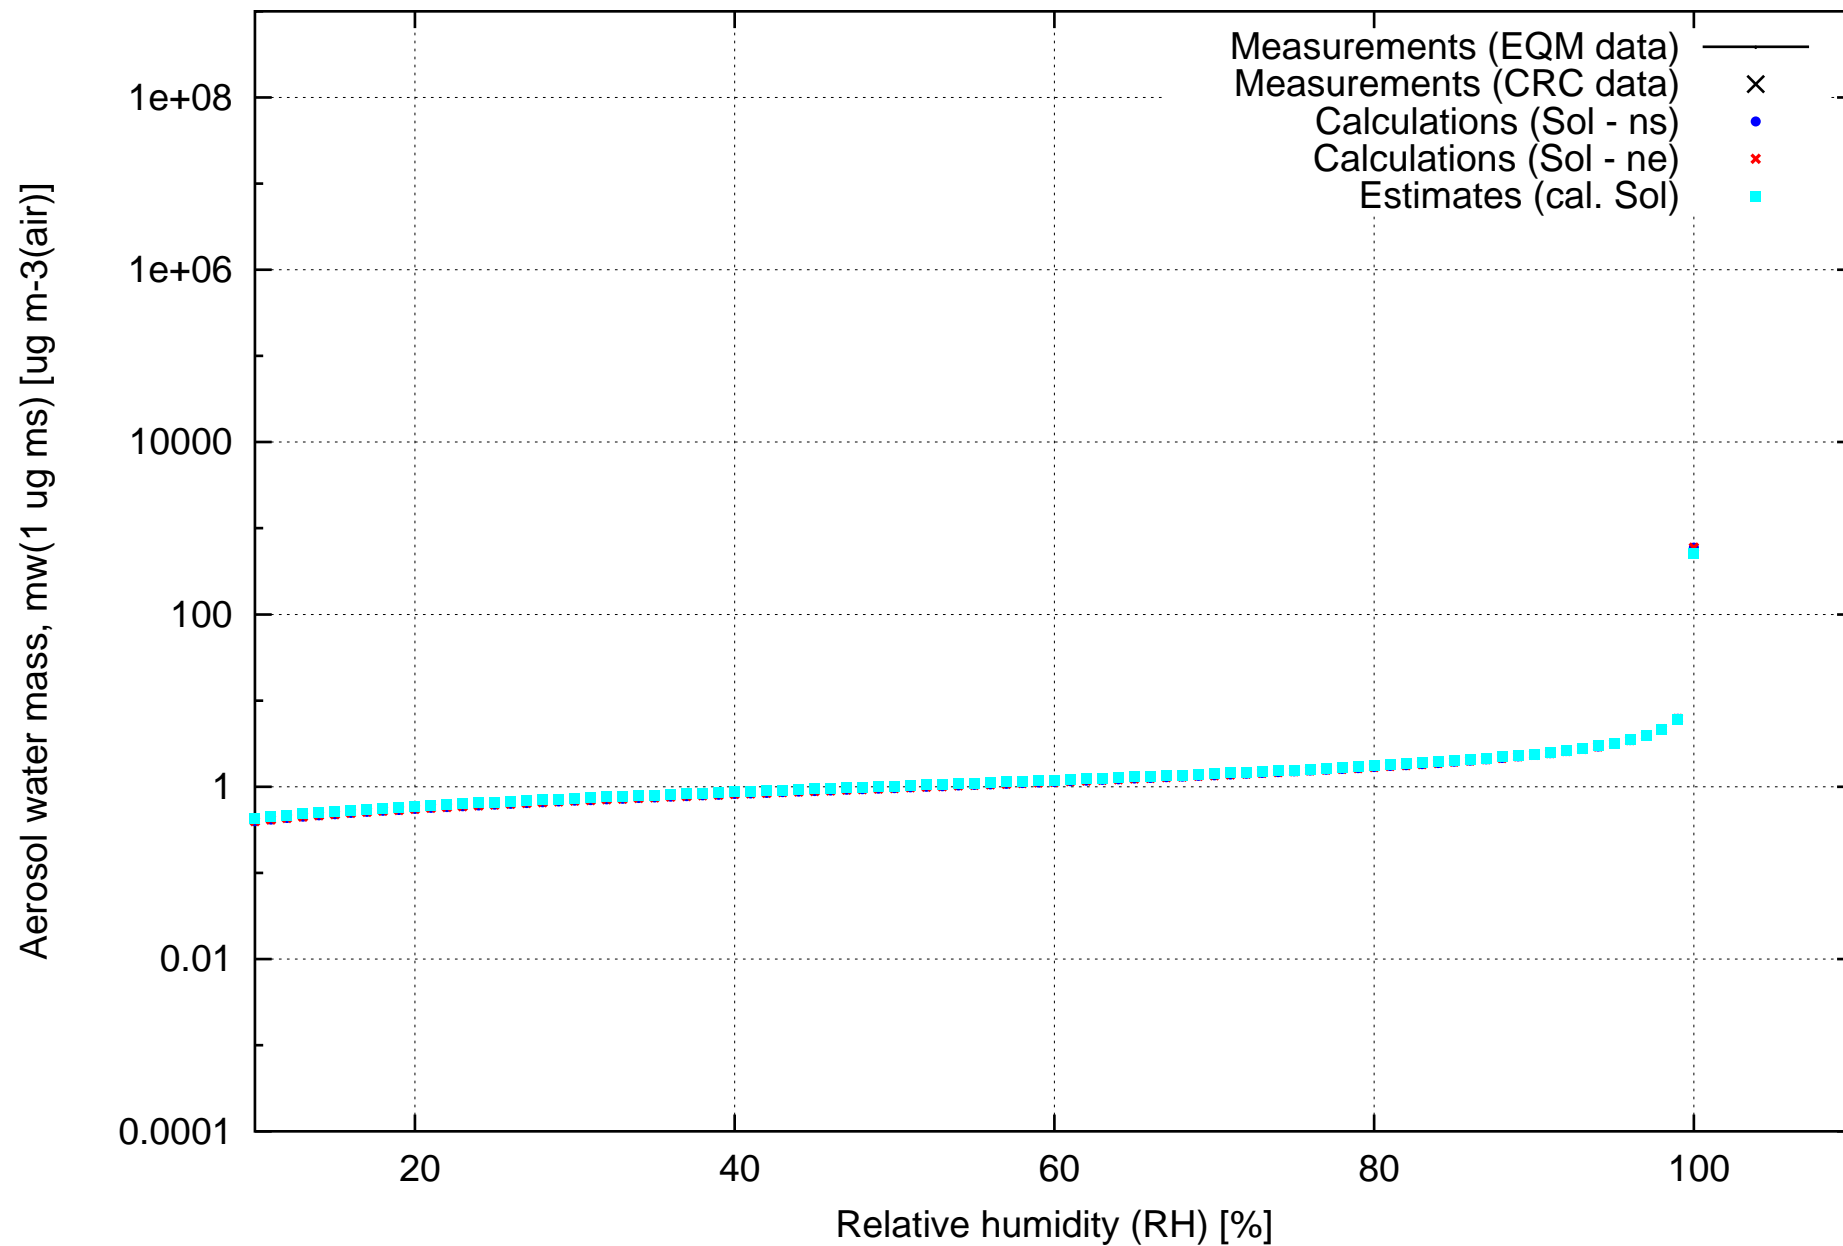

# Iron(III) iodide - FeI3

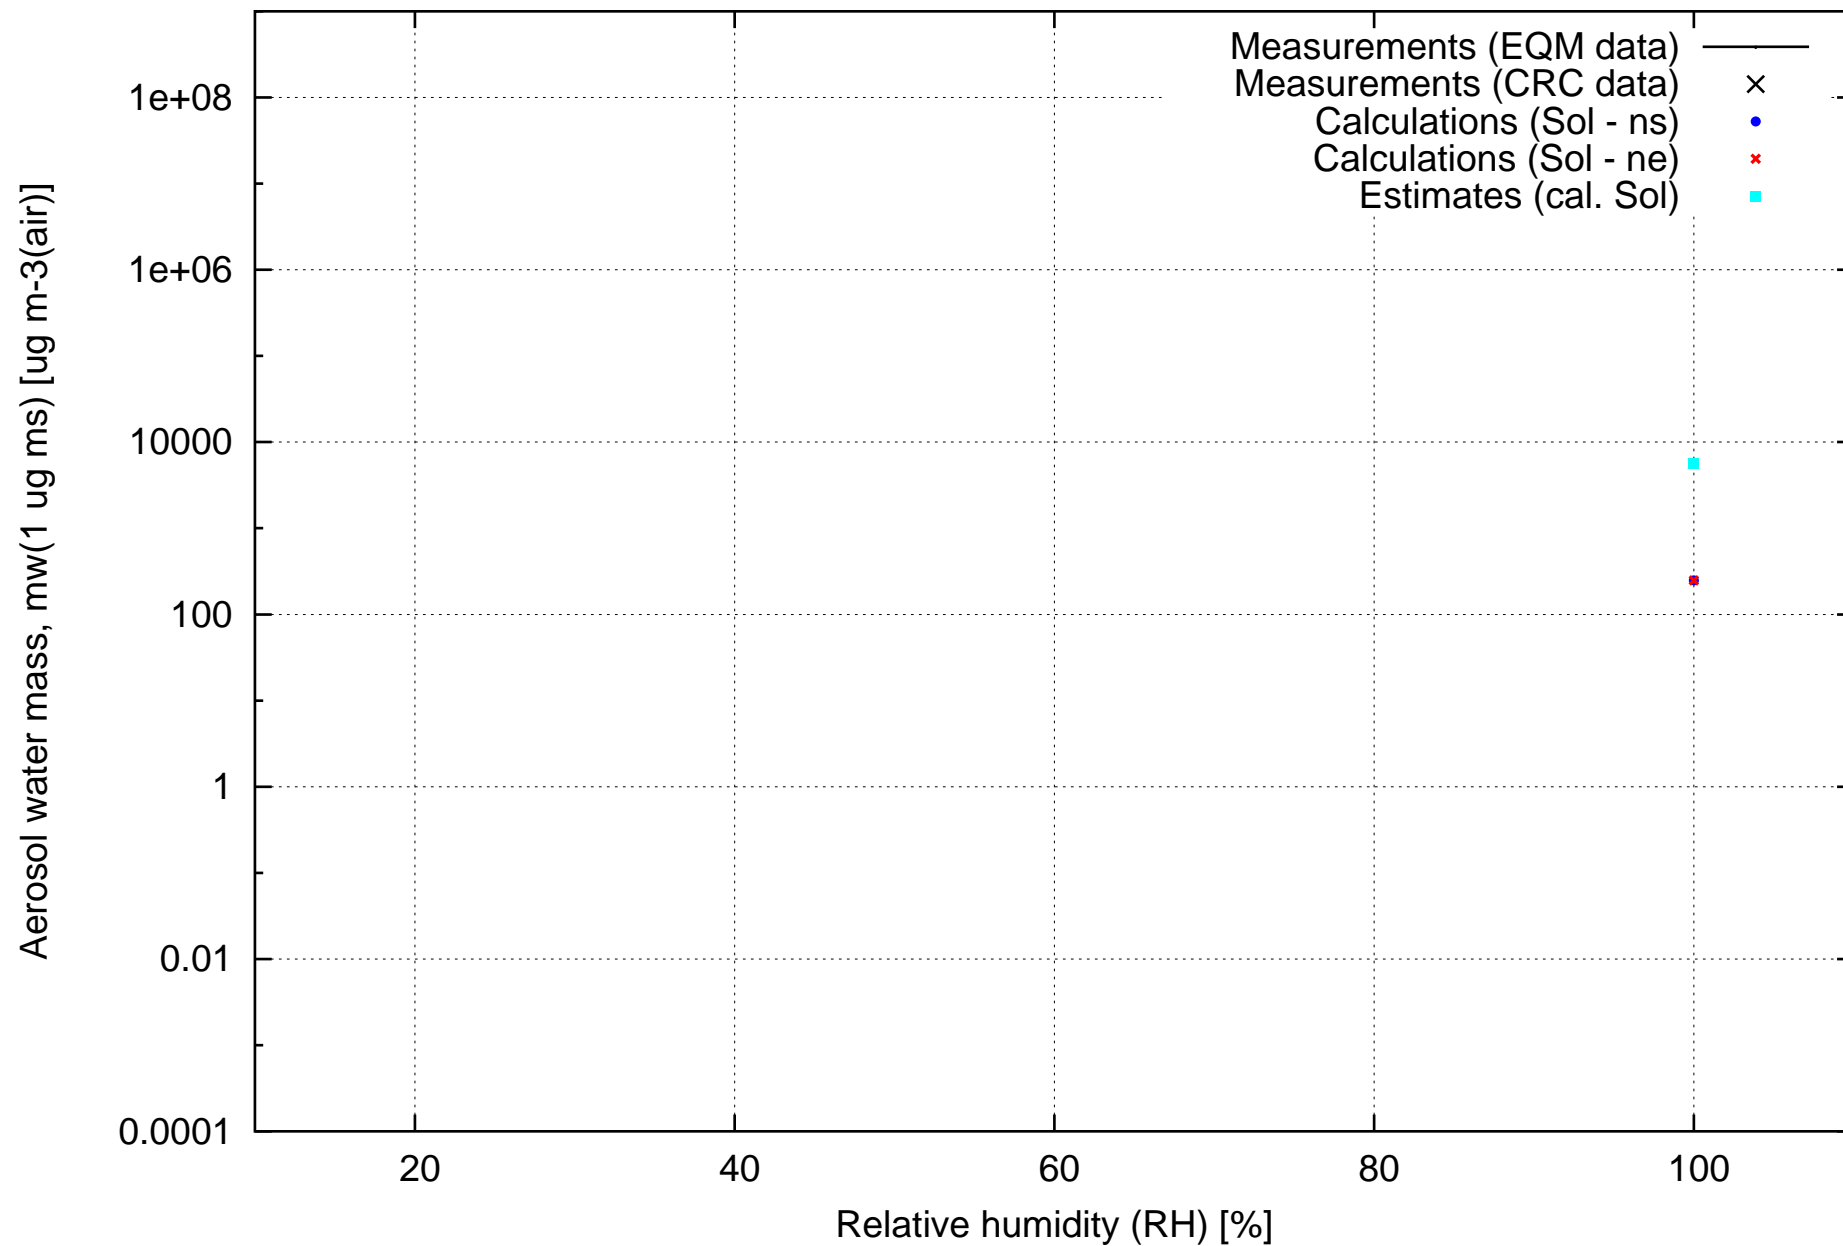

# Iron(II) carbonate - FeCO<sub>3</sub>

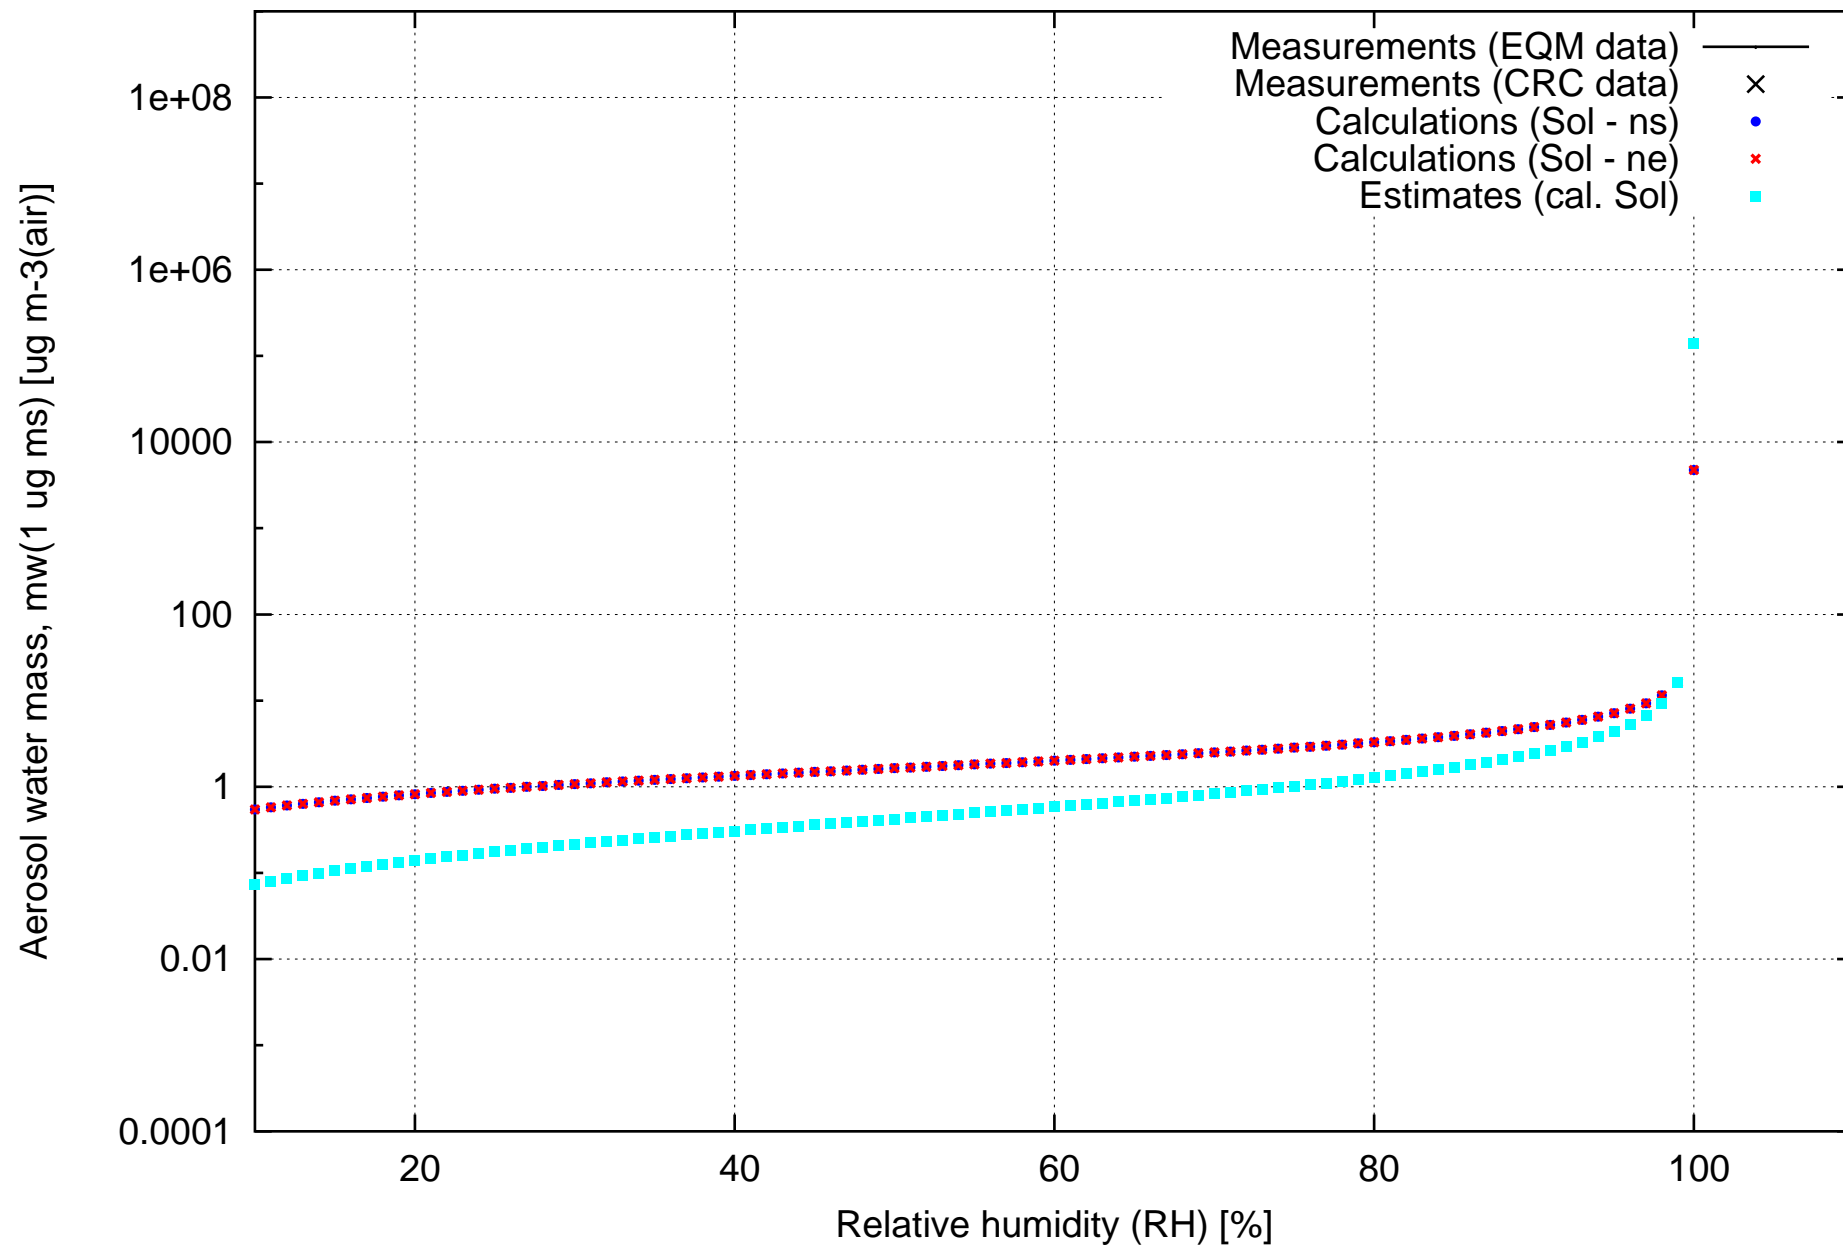

# Iron(III) - dummy



# Iron(III) hydroxide - Fe(OH)<sub>3</sub>

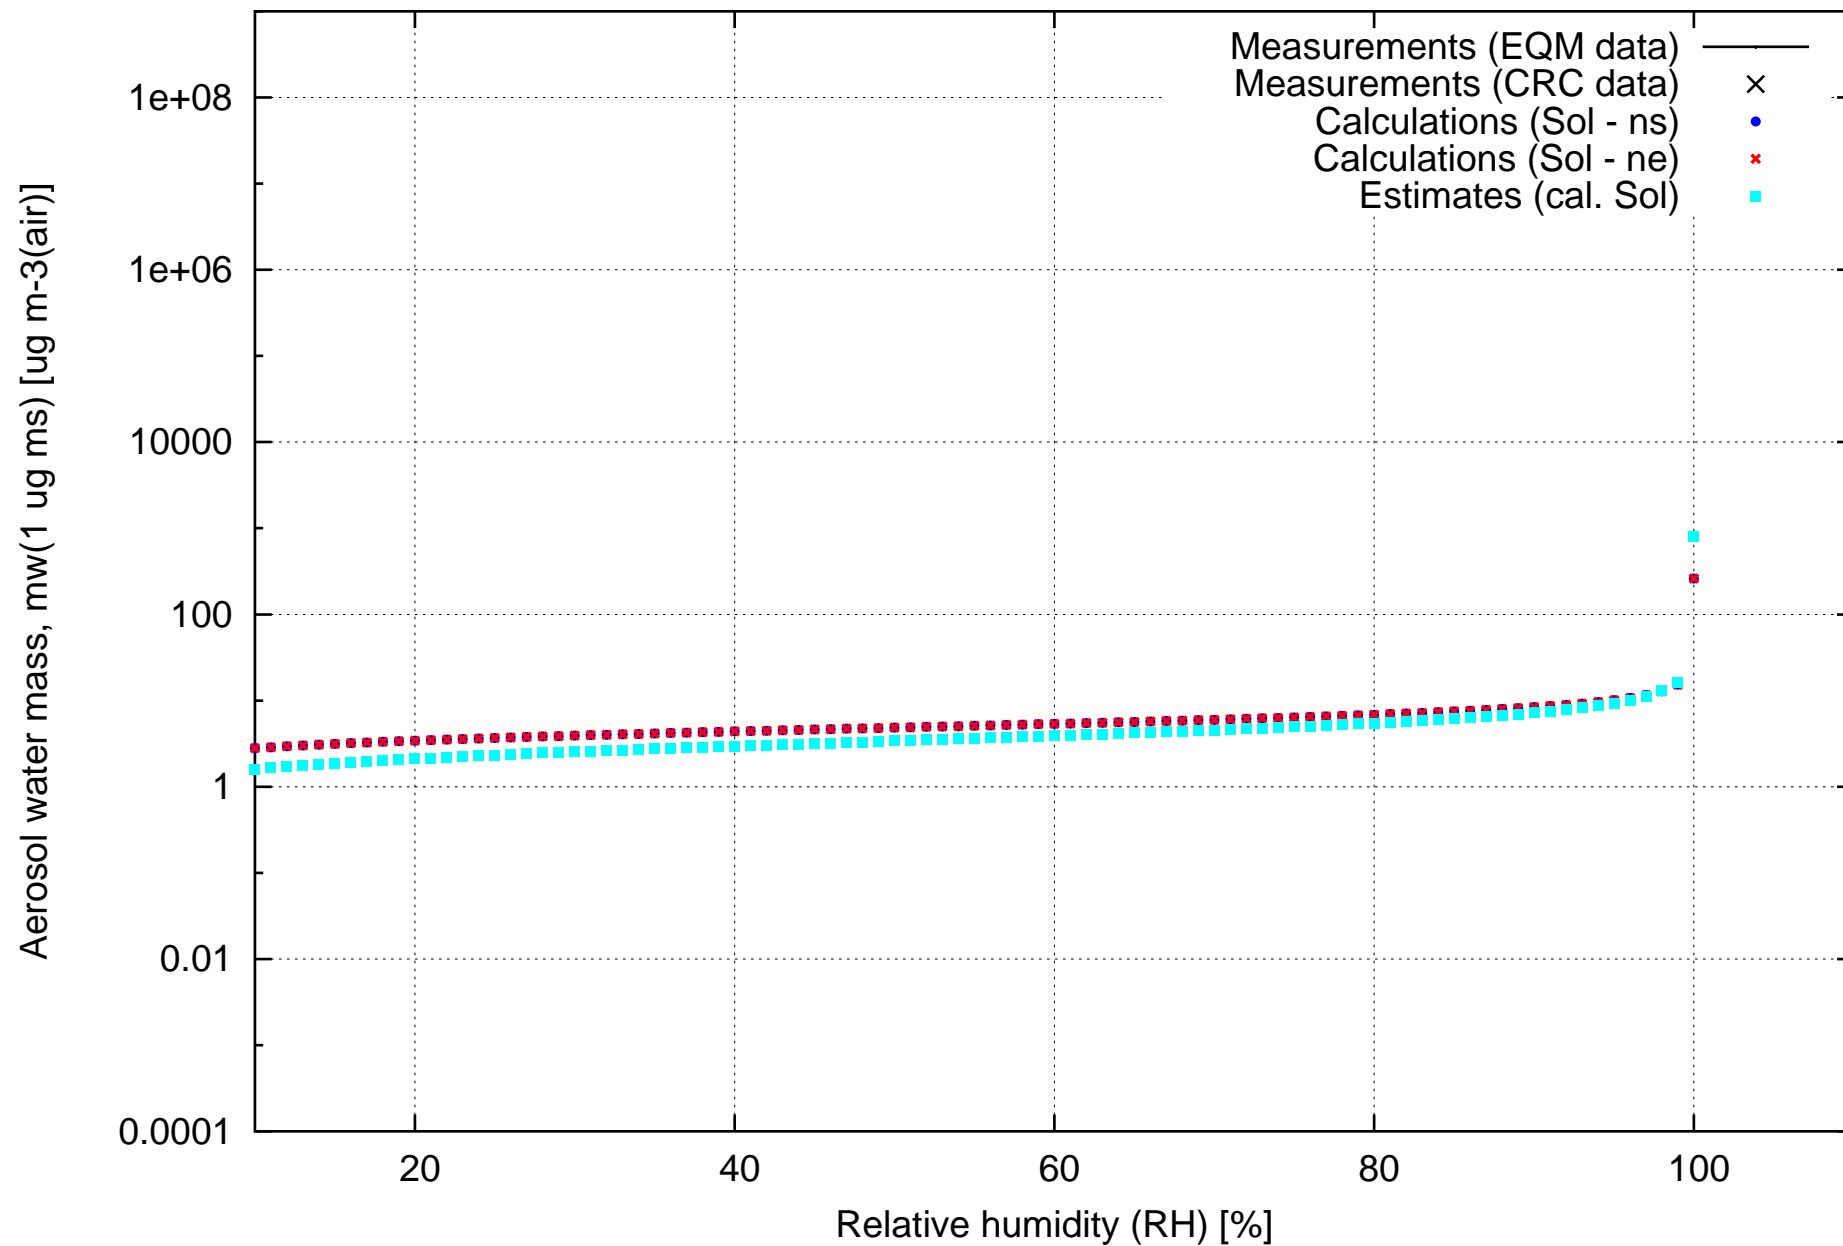

# Iron(III) formate - Fe(CHO<sub>2</sub>)<sub>3</sub>

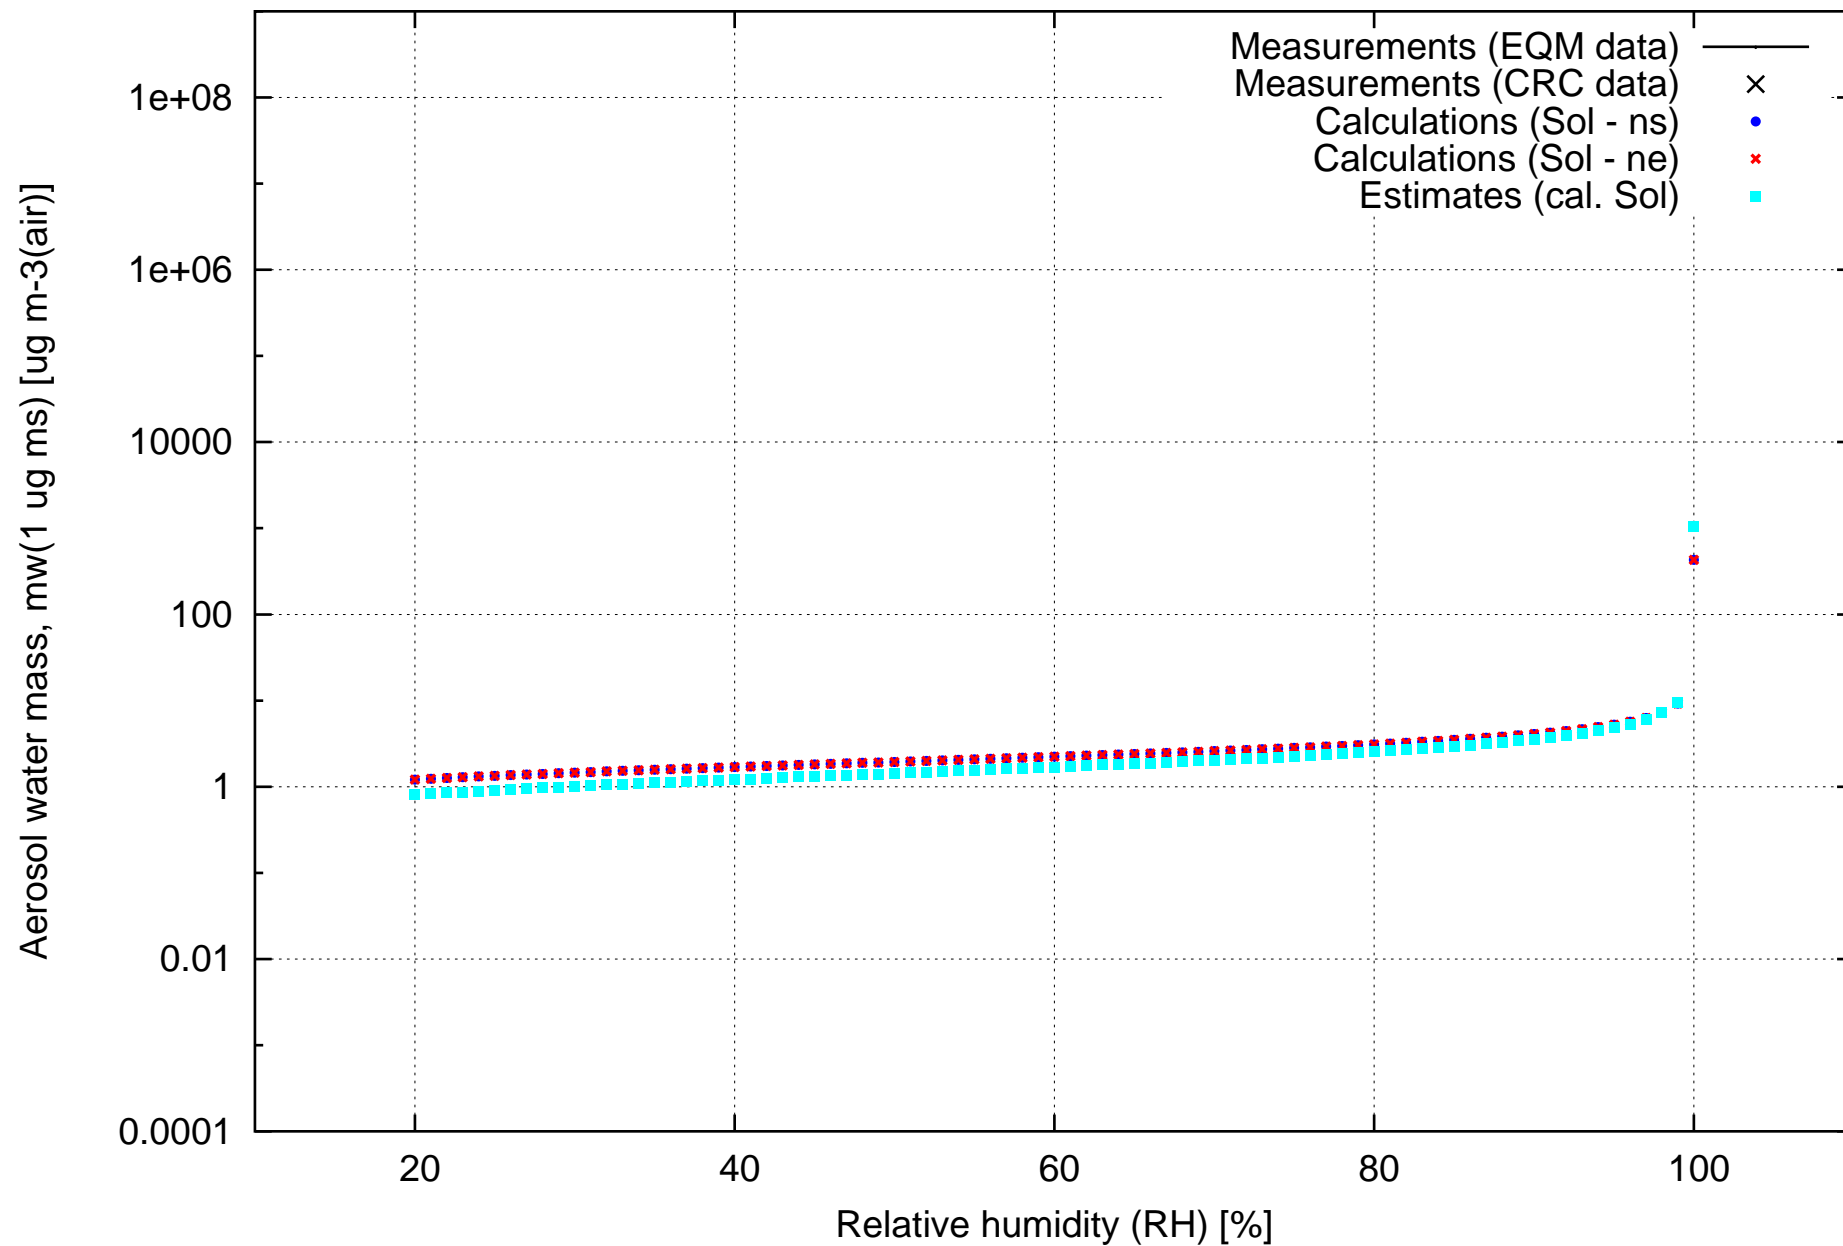

Iron(III) acetate -  $\text{FeOH}(\text{C}_2\text{H}_3\text{O}_2)_2$

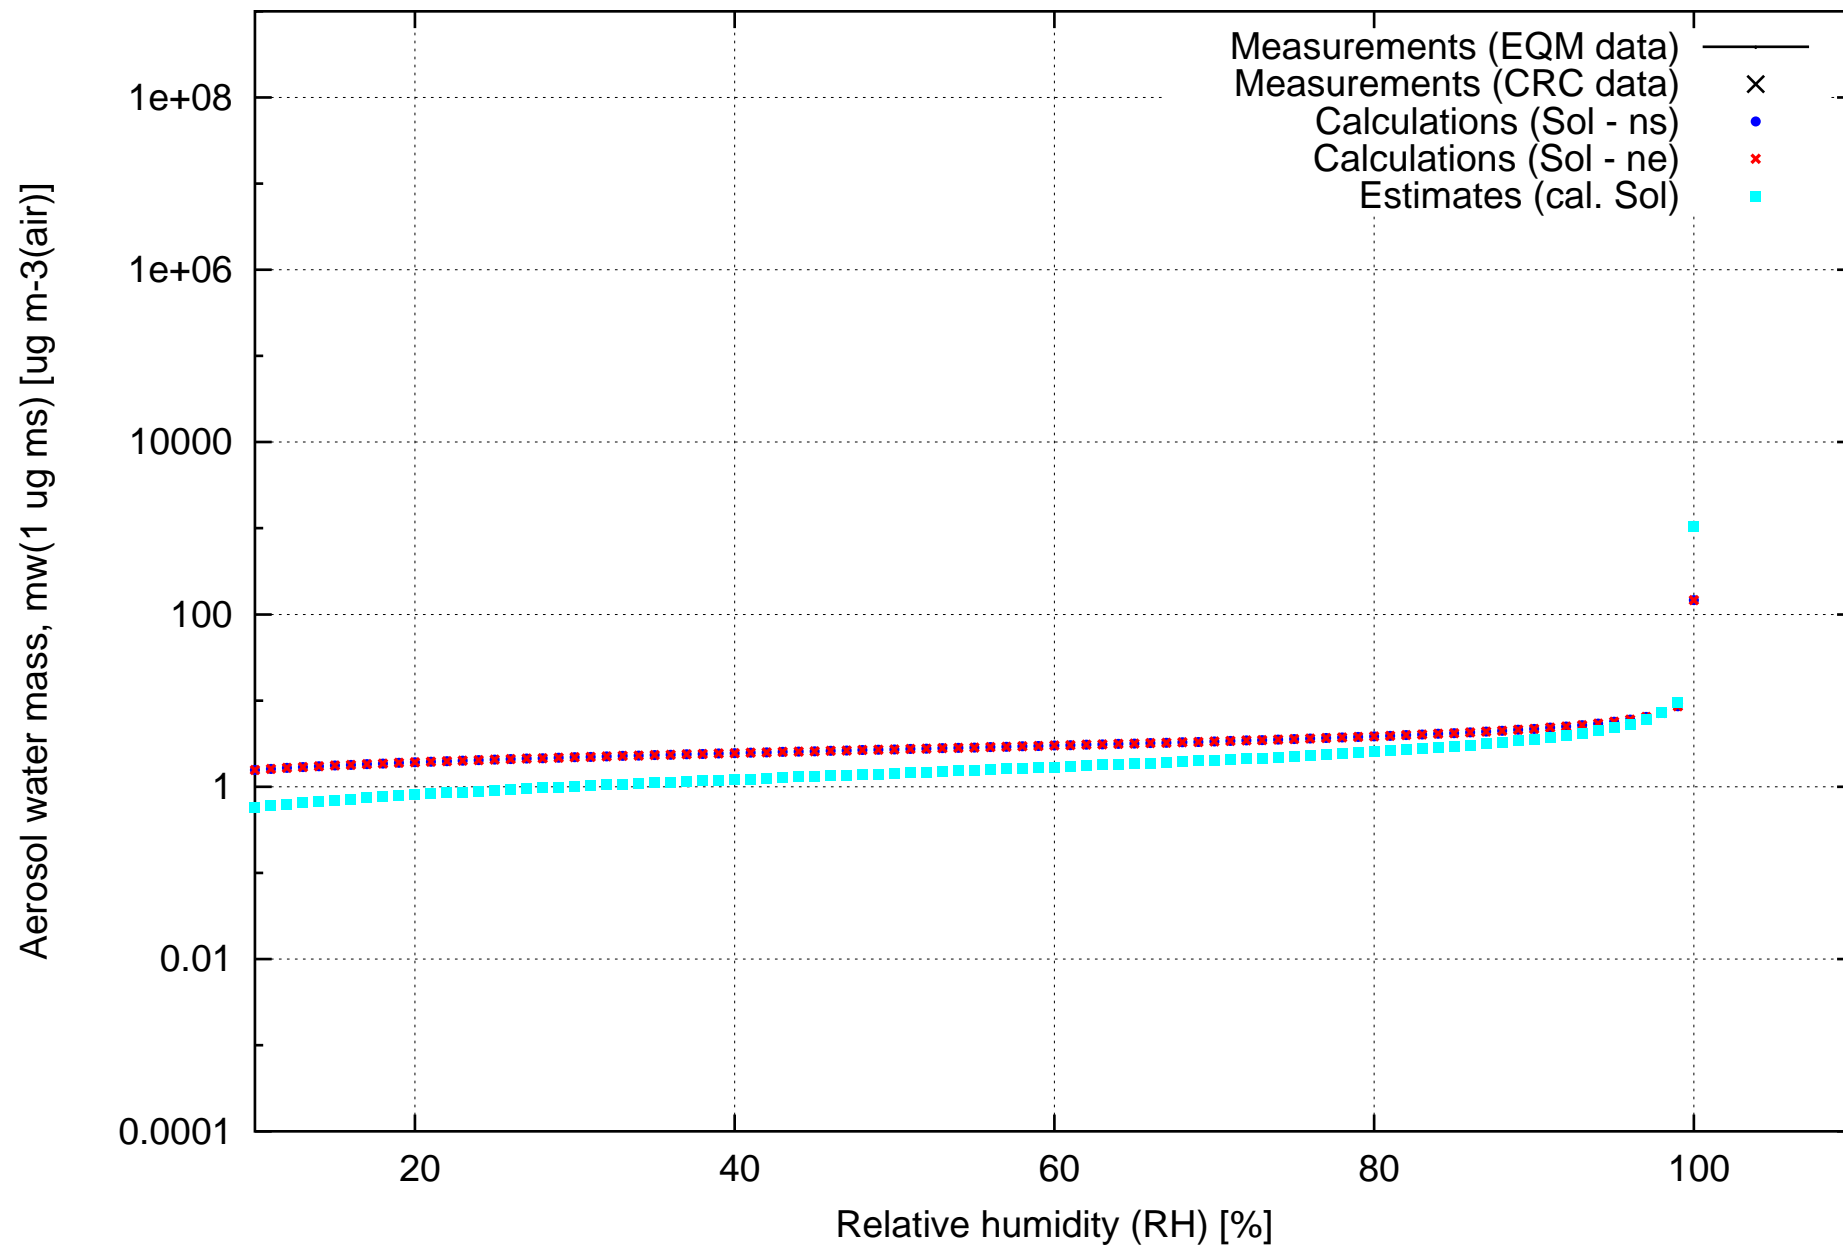



# Iron(III) oxalate - $\text{Fe}_2(\text{C}_2\text{O}_4)_3$

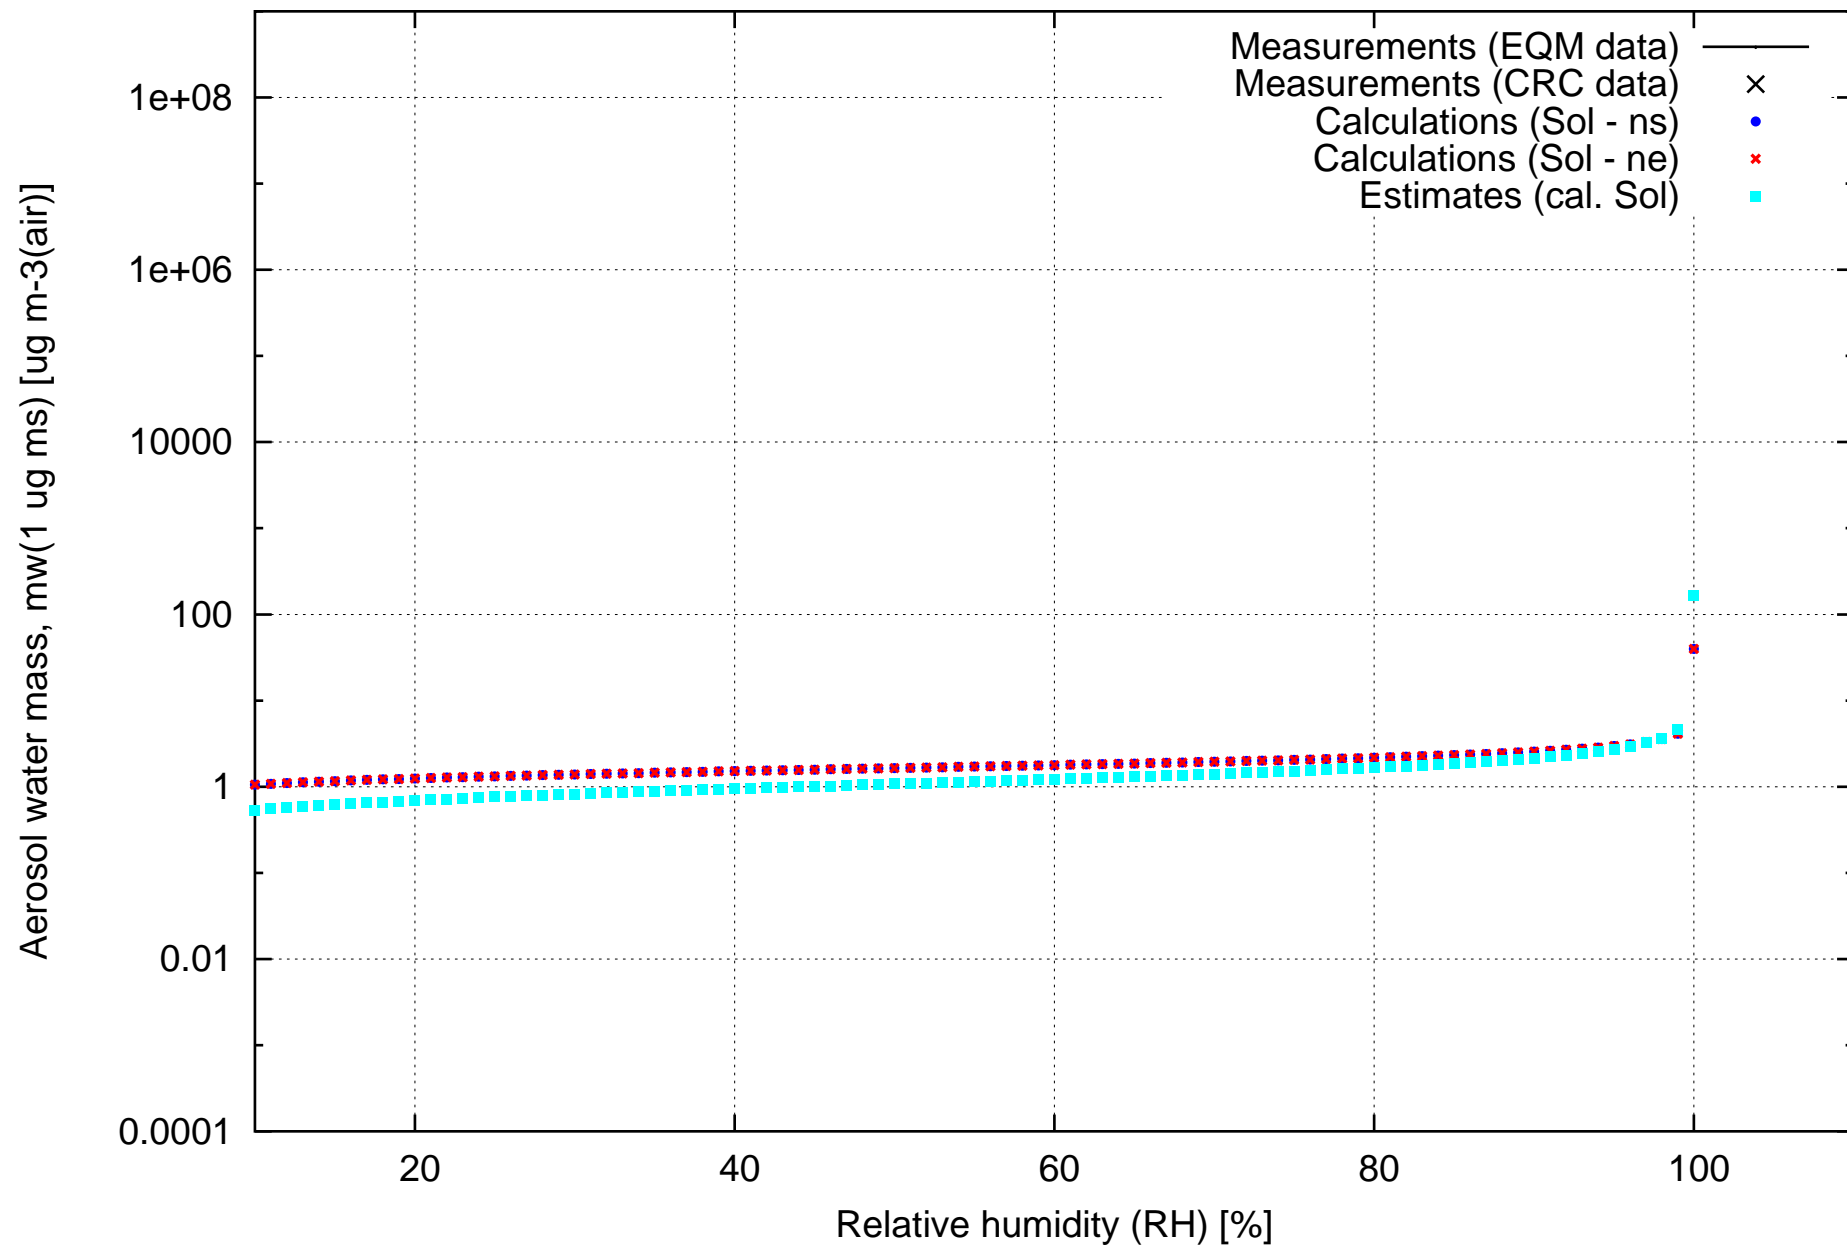

# Iron(III) citrate - FeC6H5O7

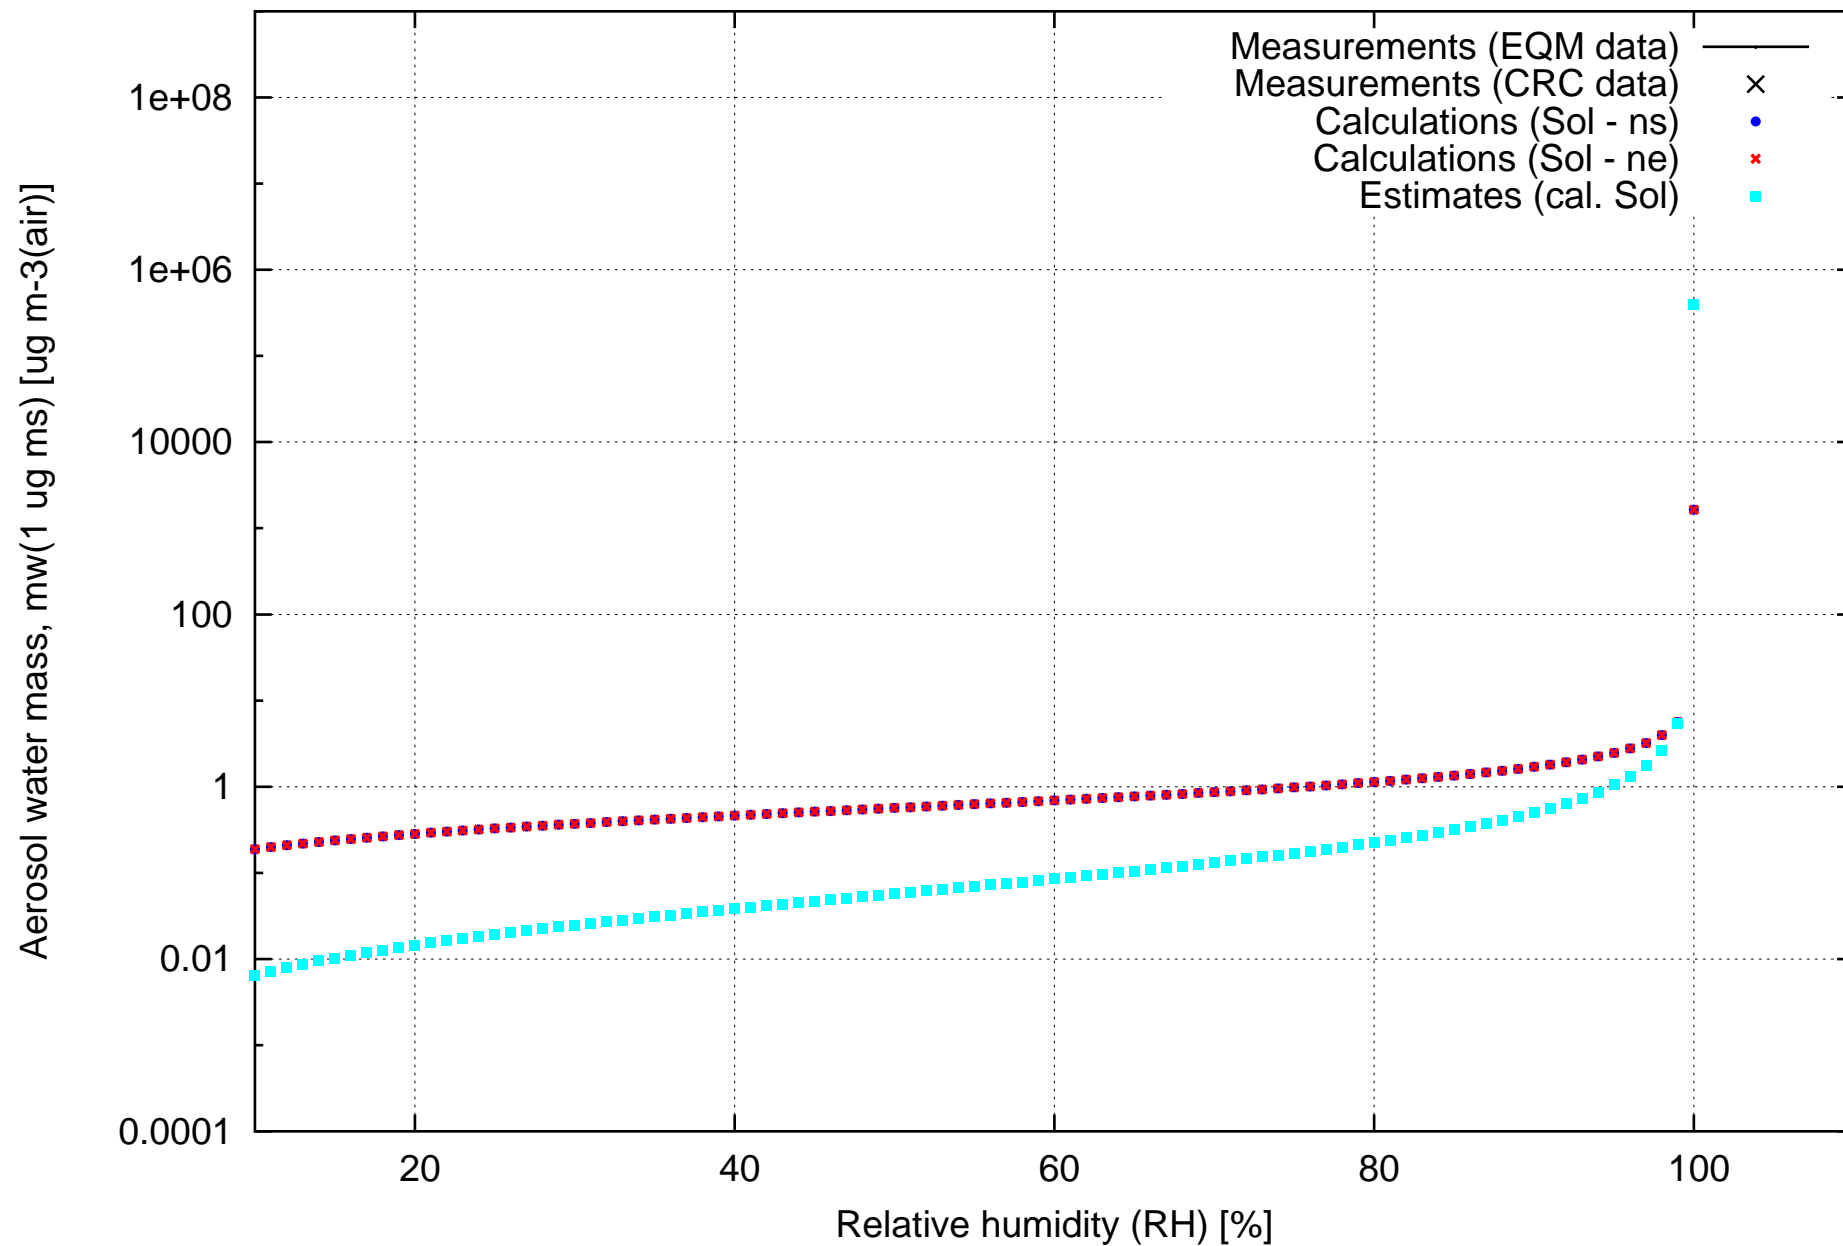

## Ammonia - $\text{NH}_3$

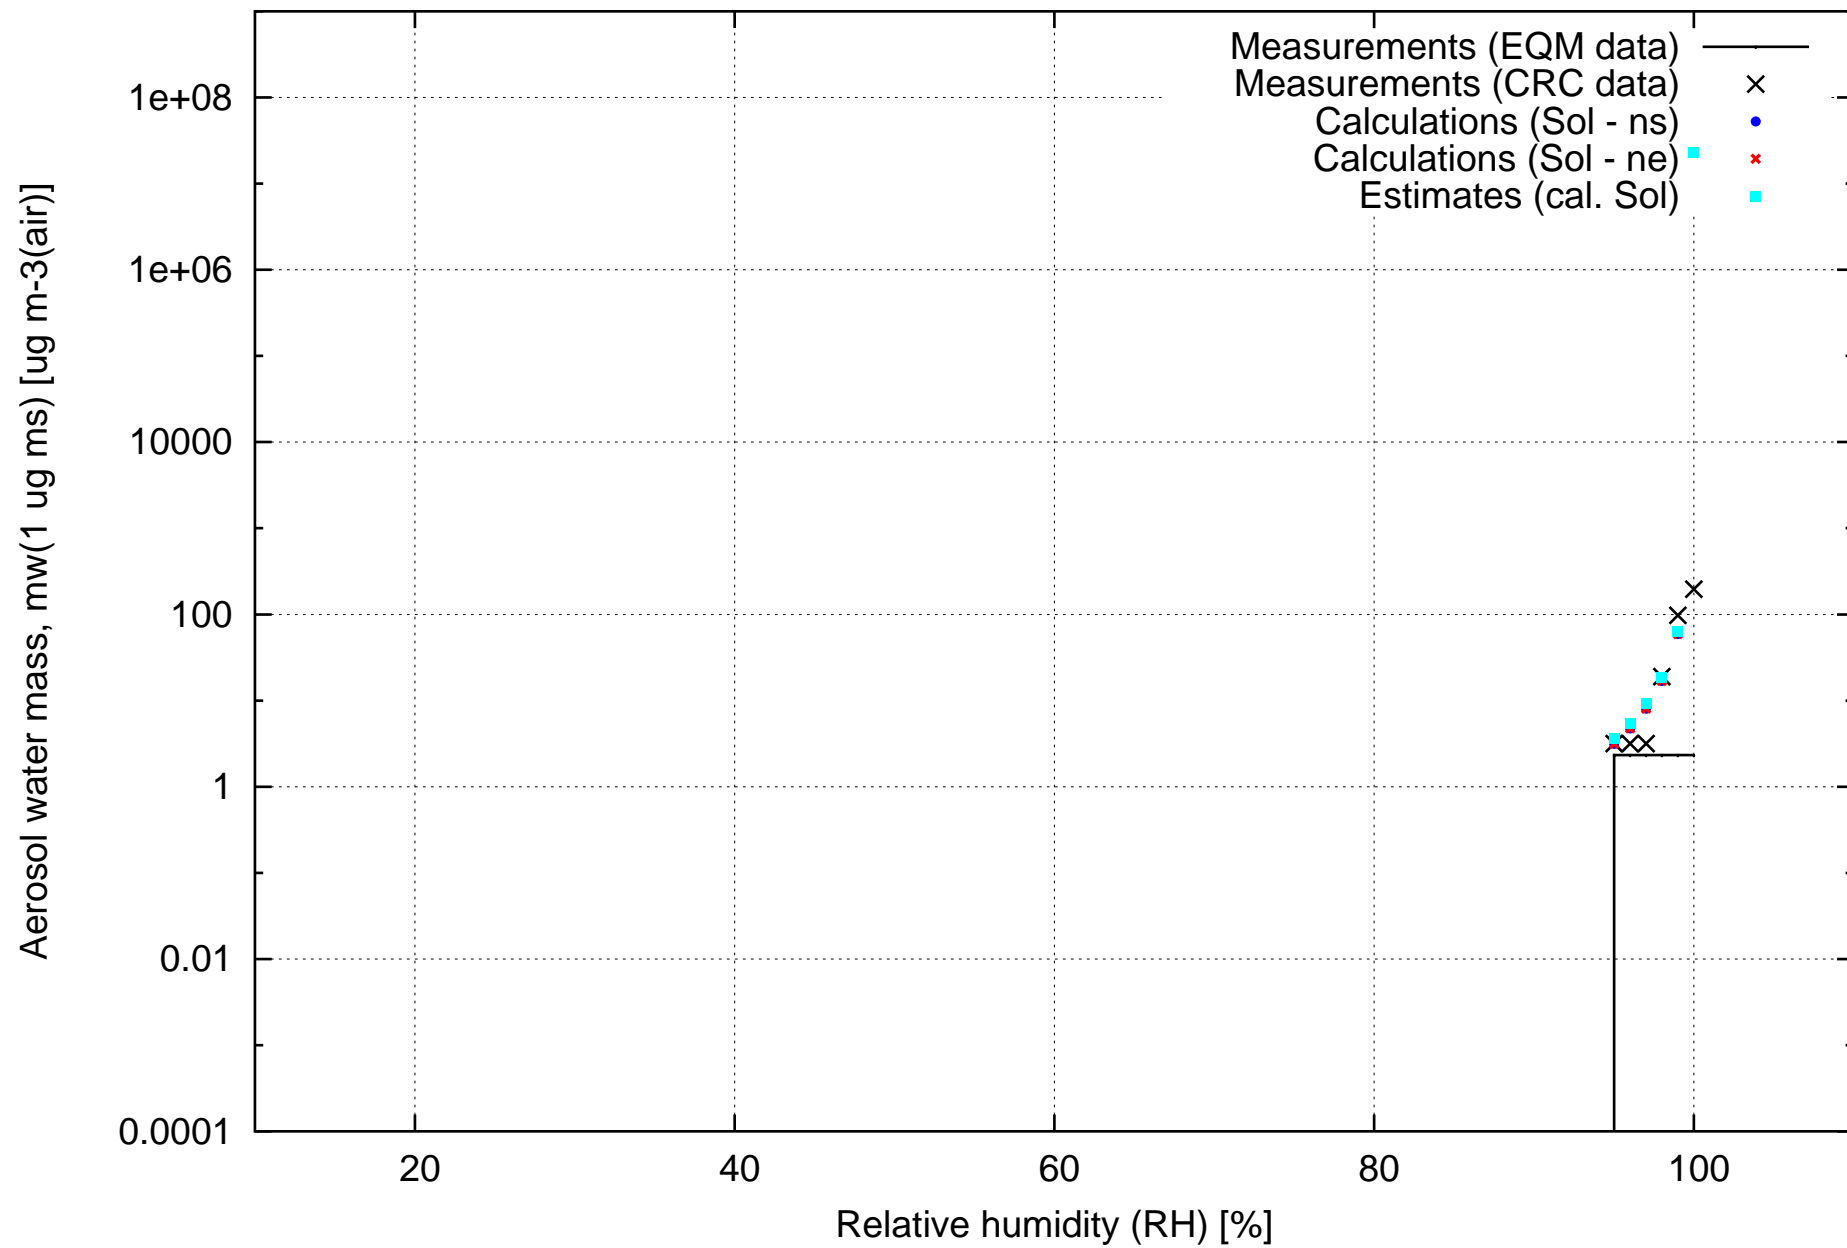

# Acetone - (CH<sub>3</sub>)<sub>2</sub>CO

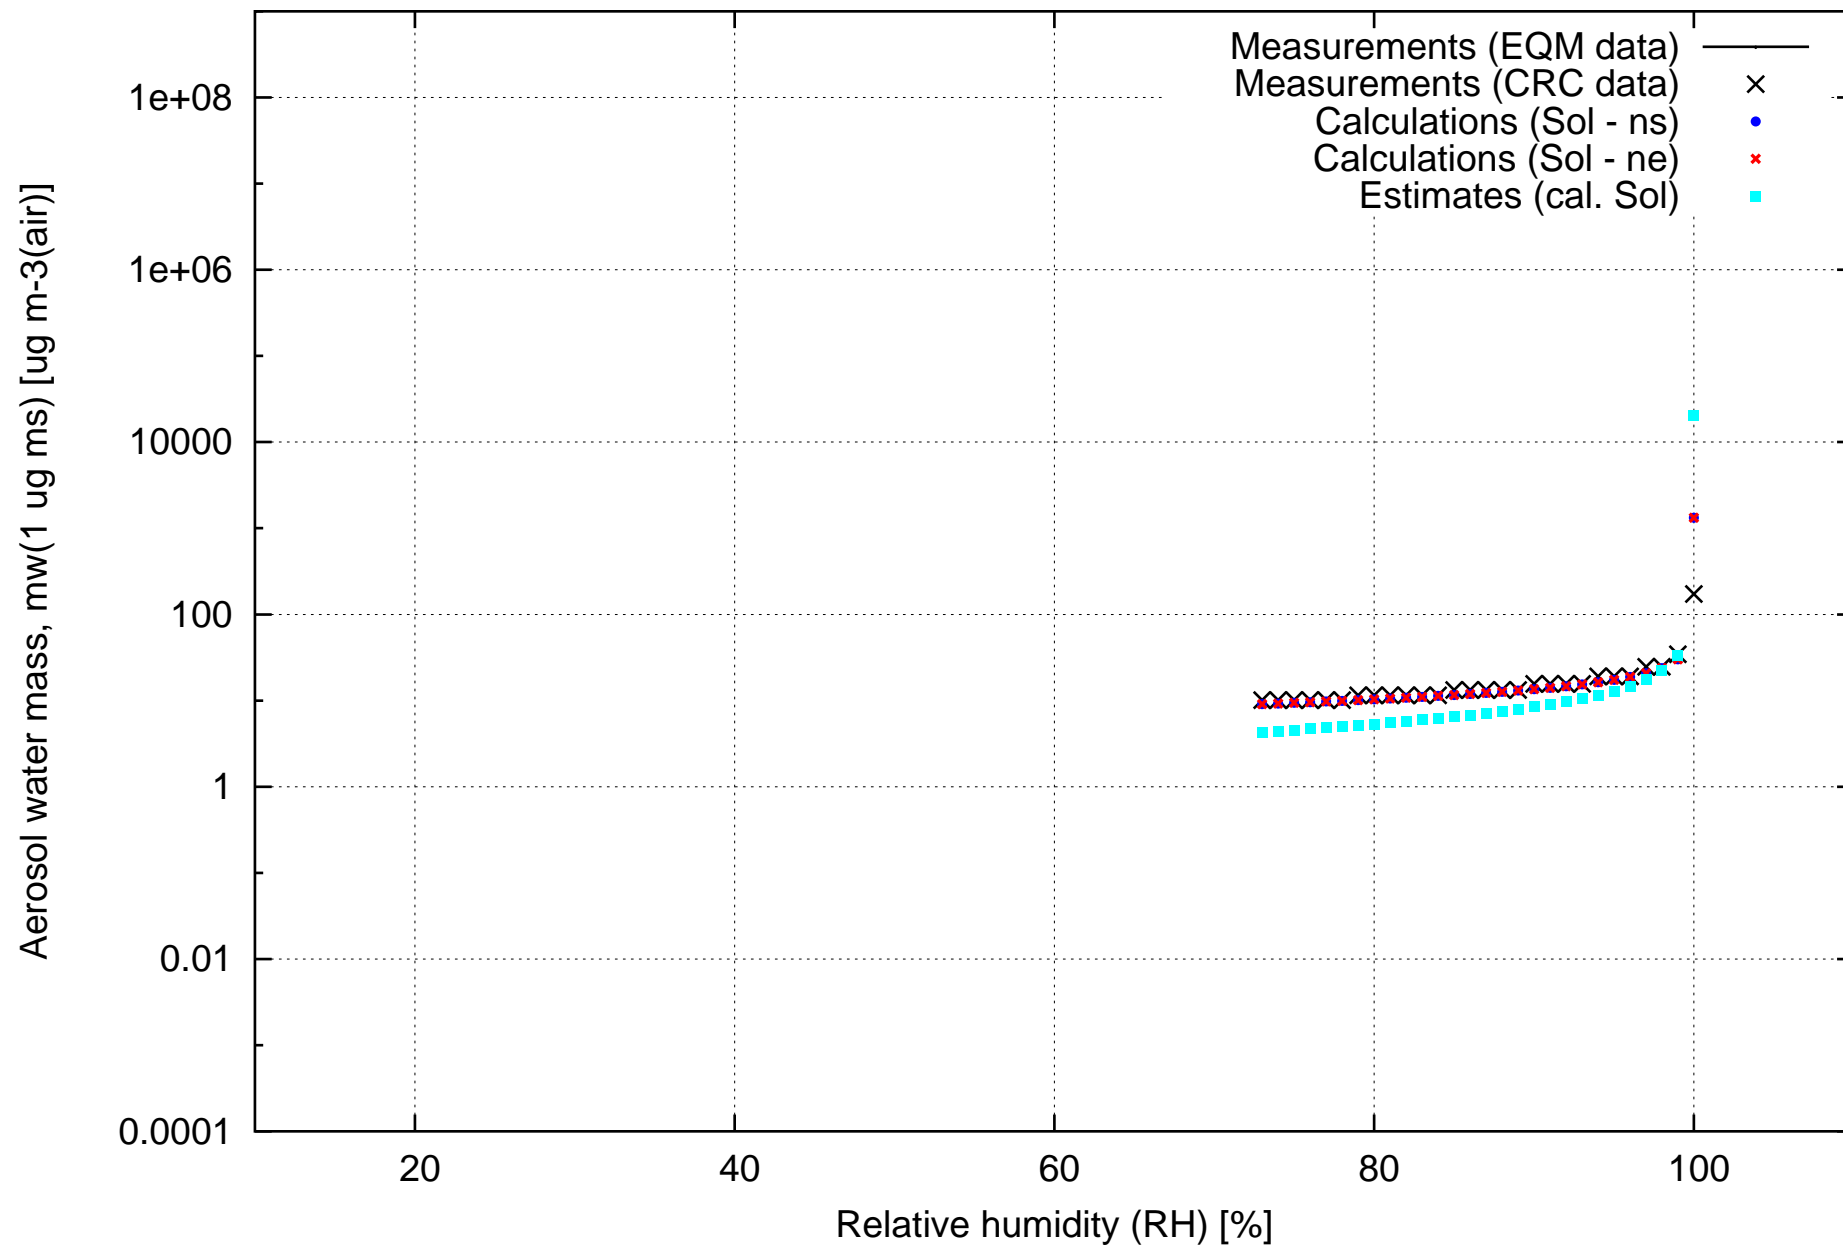

# Methanol - CH<sub>3</sub>OH

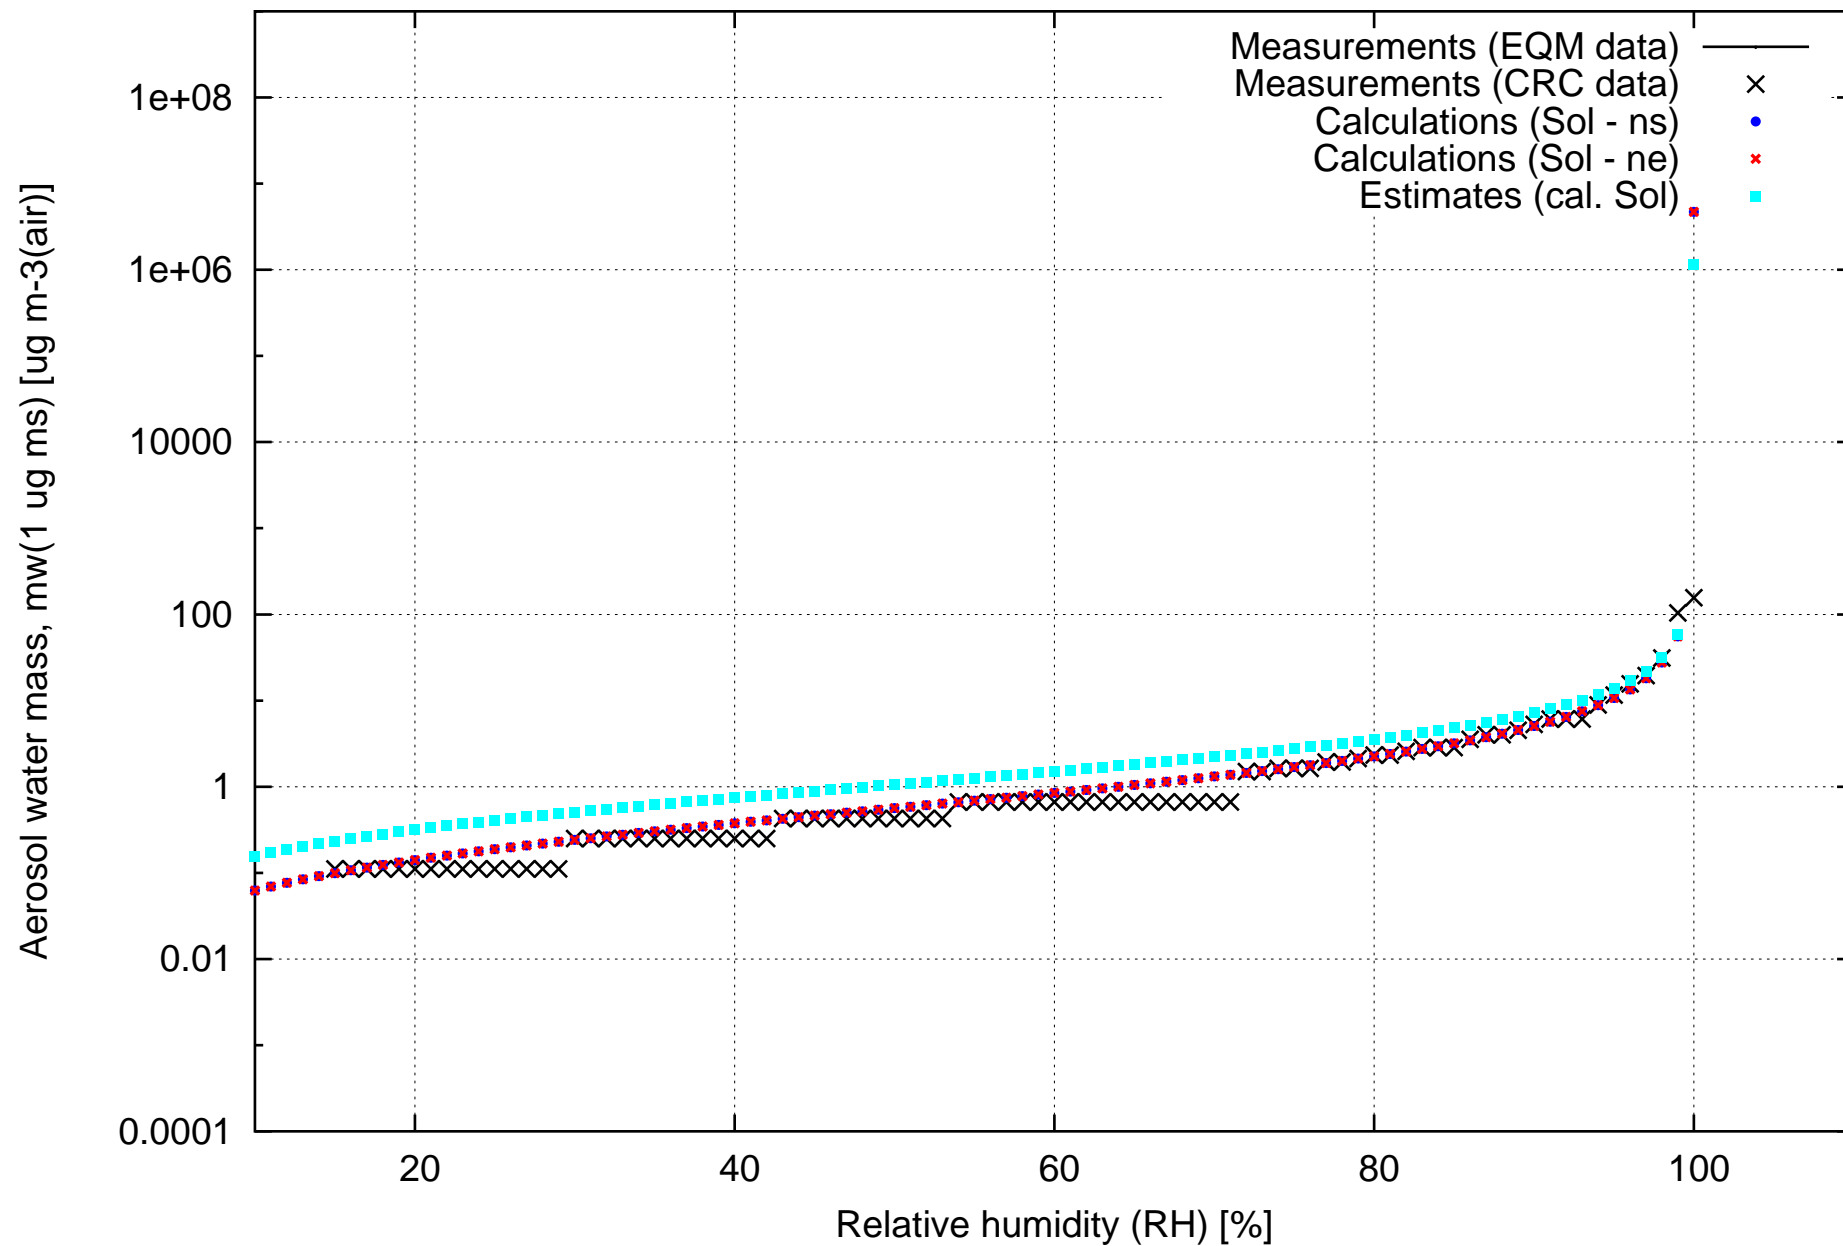

# Ethanol - CH<sub>3</sub>CH<sub>2</sub>OH

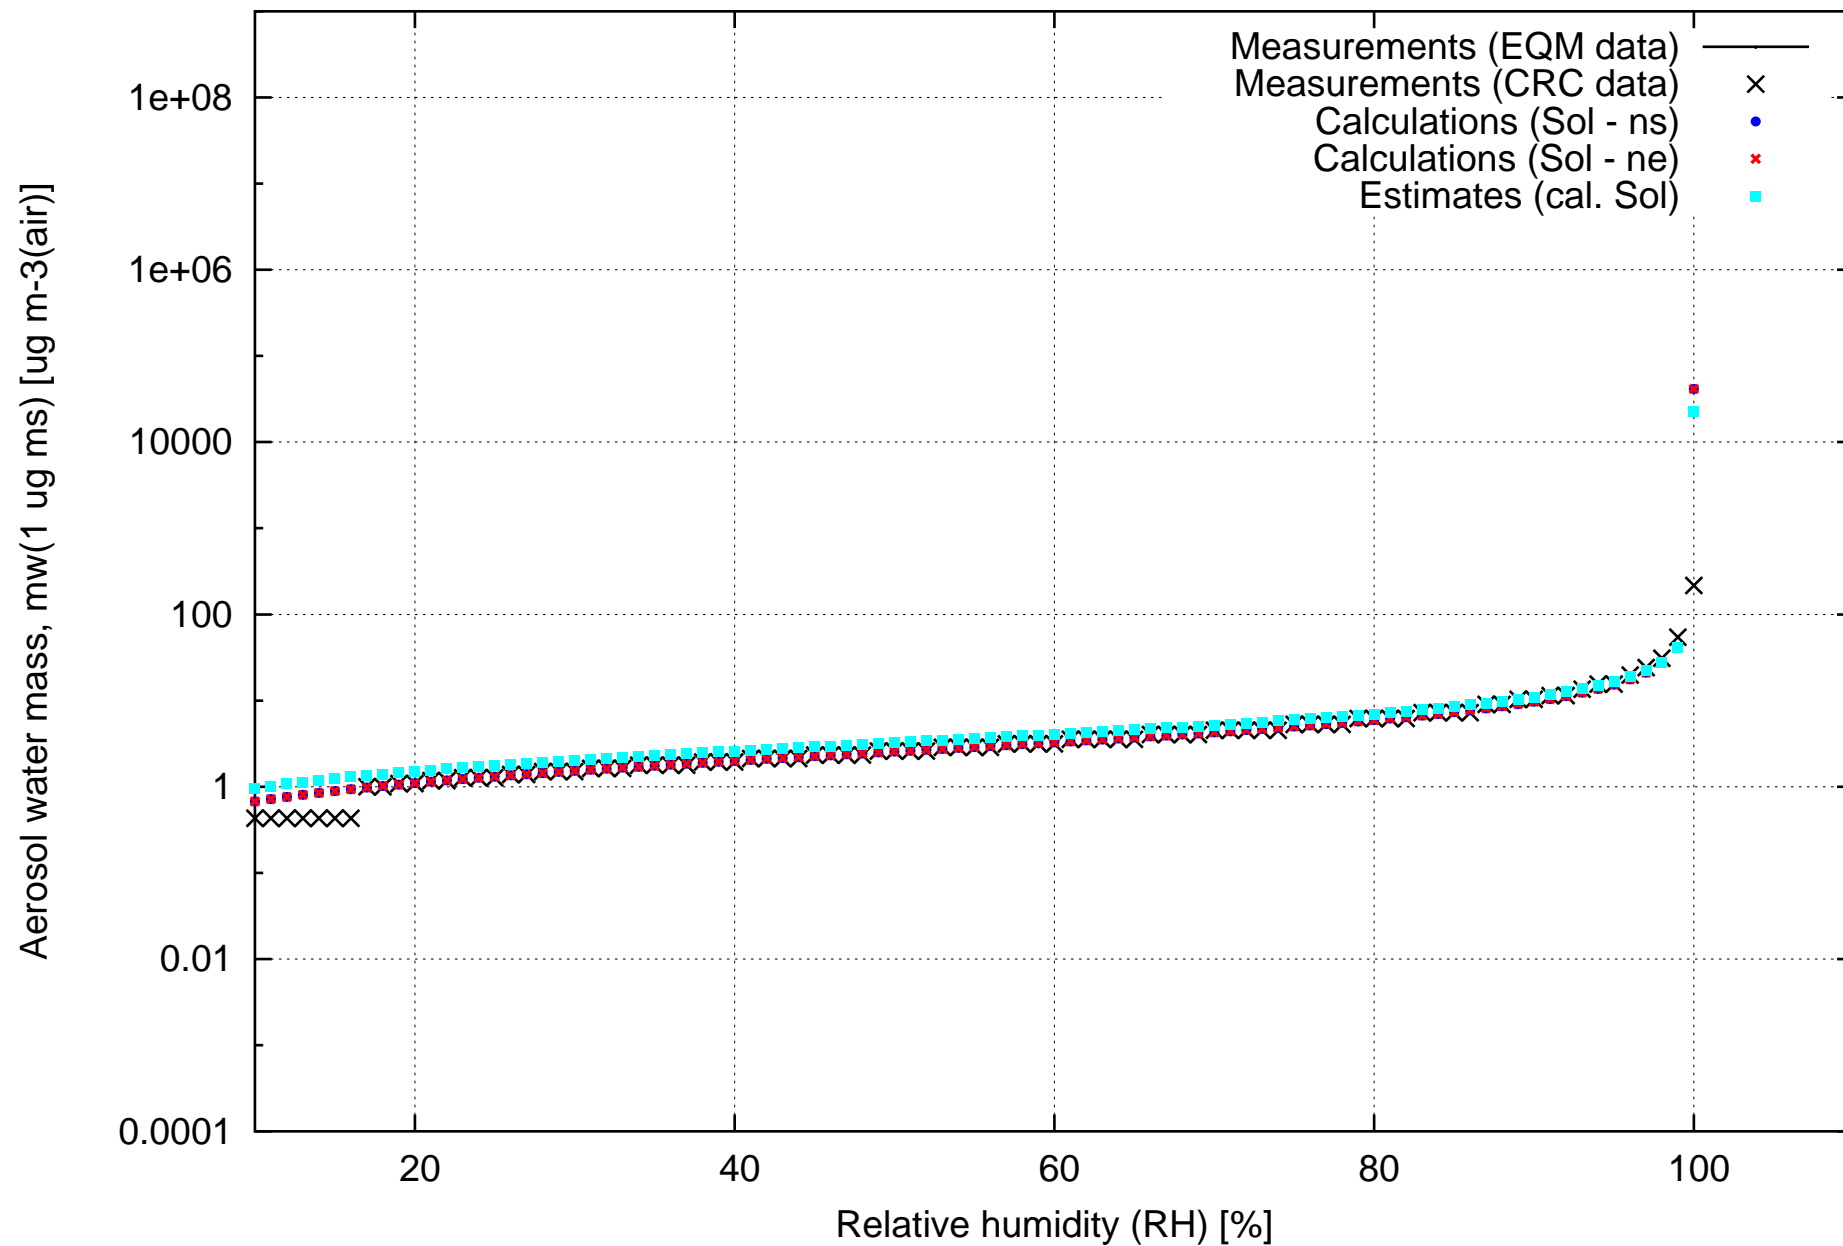

# D-Fructose - C<sub>6</sub>H<sub>12</sub>O<sub>6</sub>

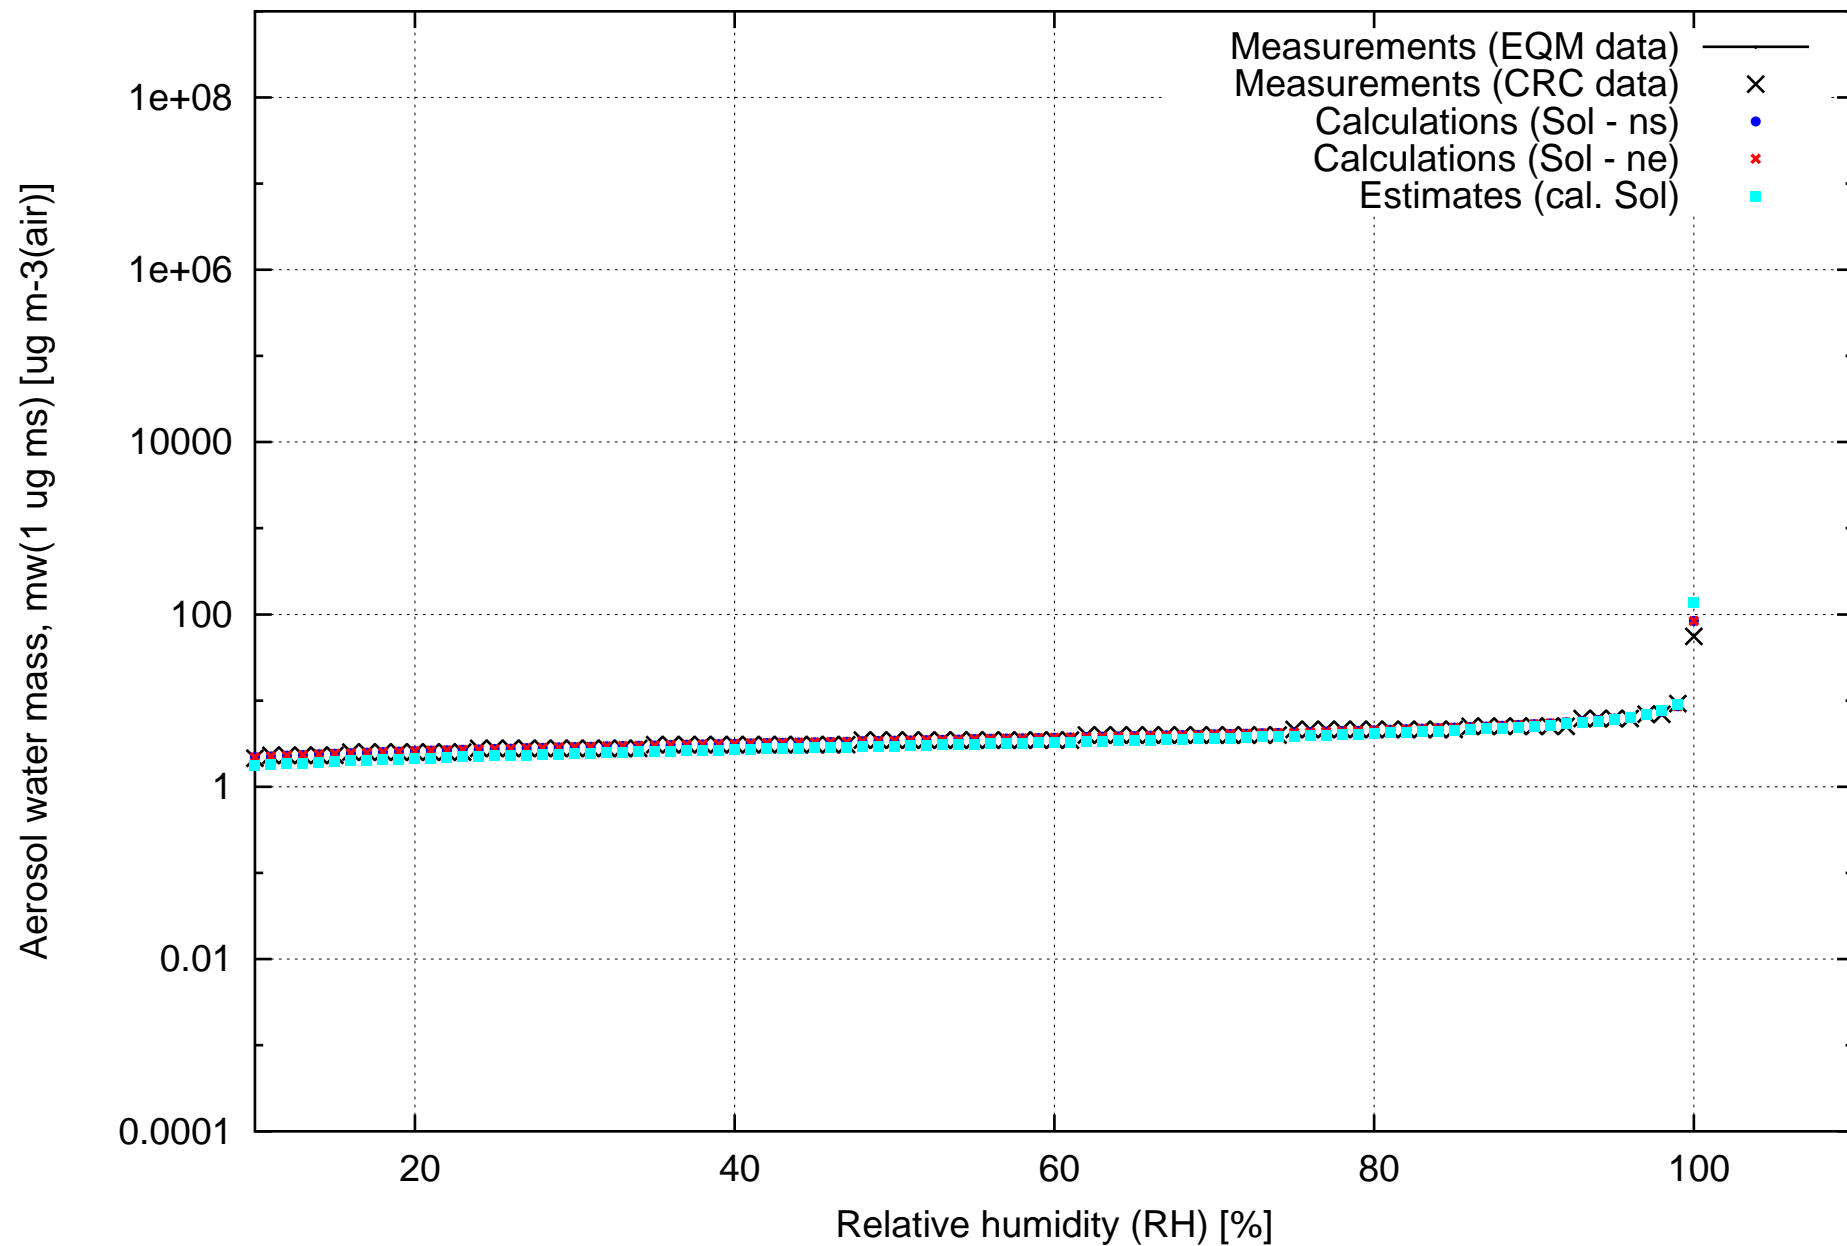

# D-Mannitol - C<sub>6</sub>H<sub>14</sub>O<sub>6</sub>

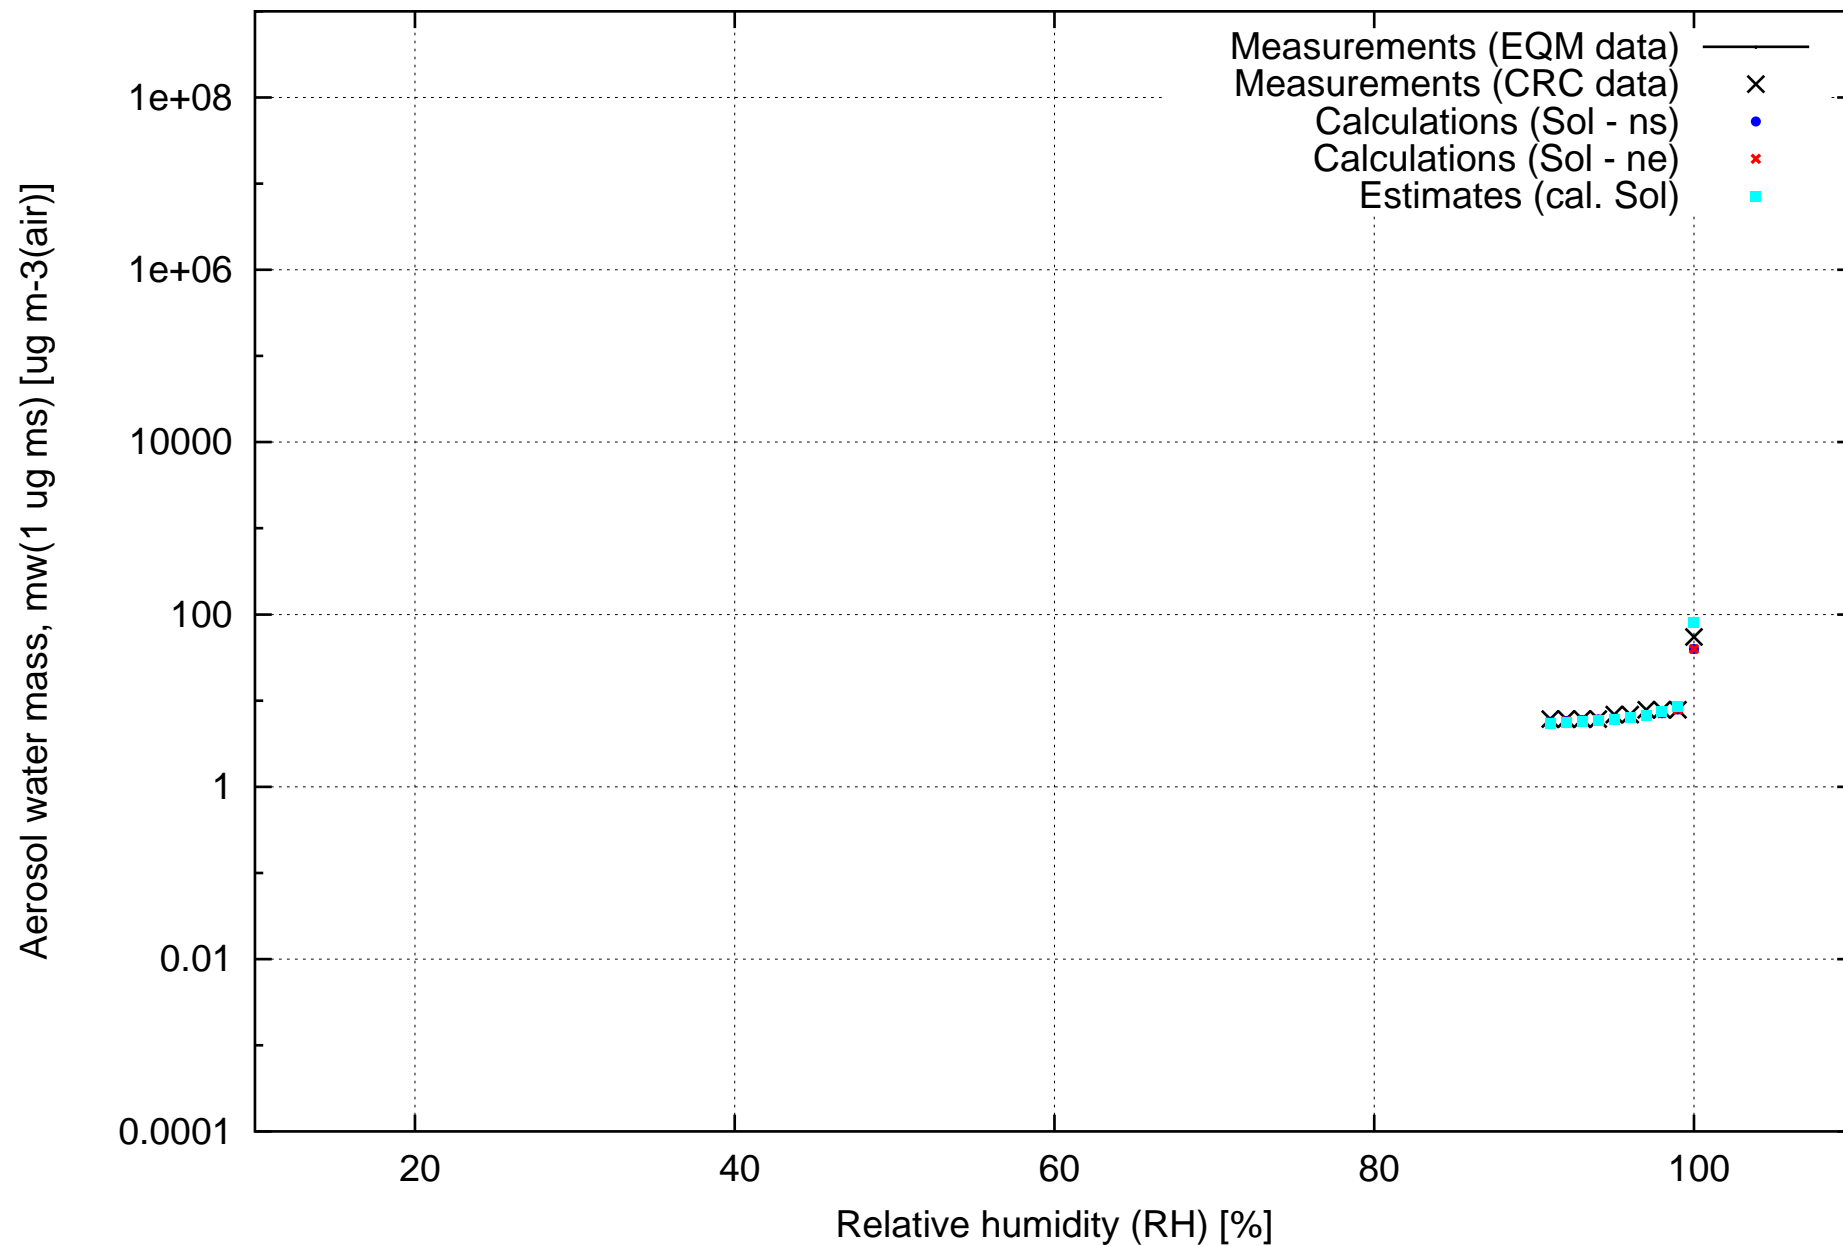



# Sucrose - C12H22O11

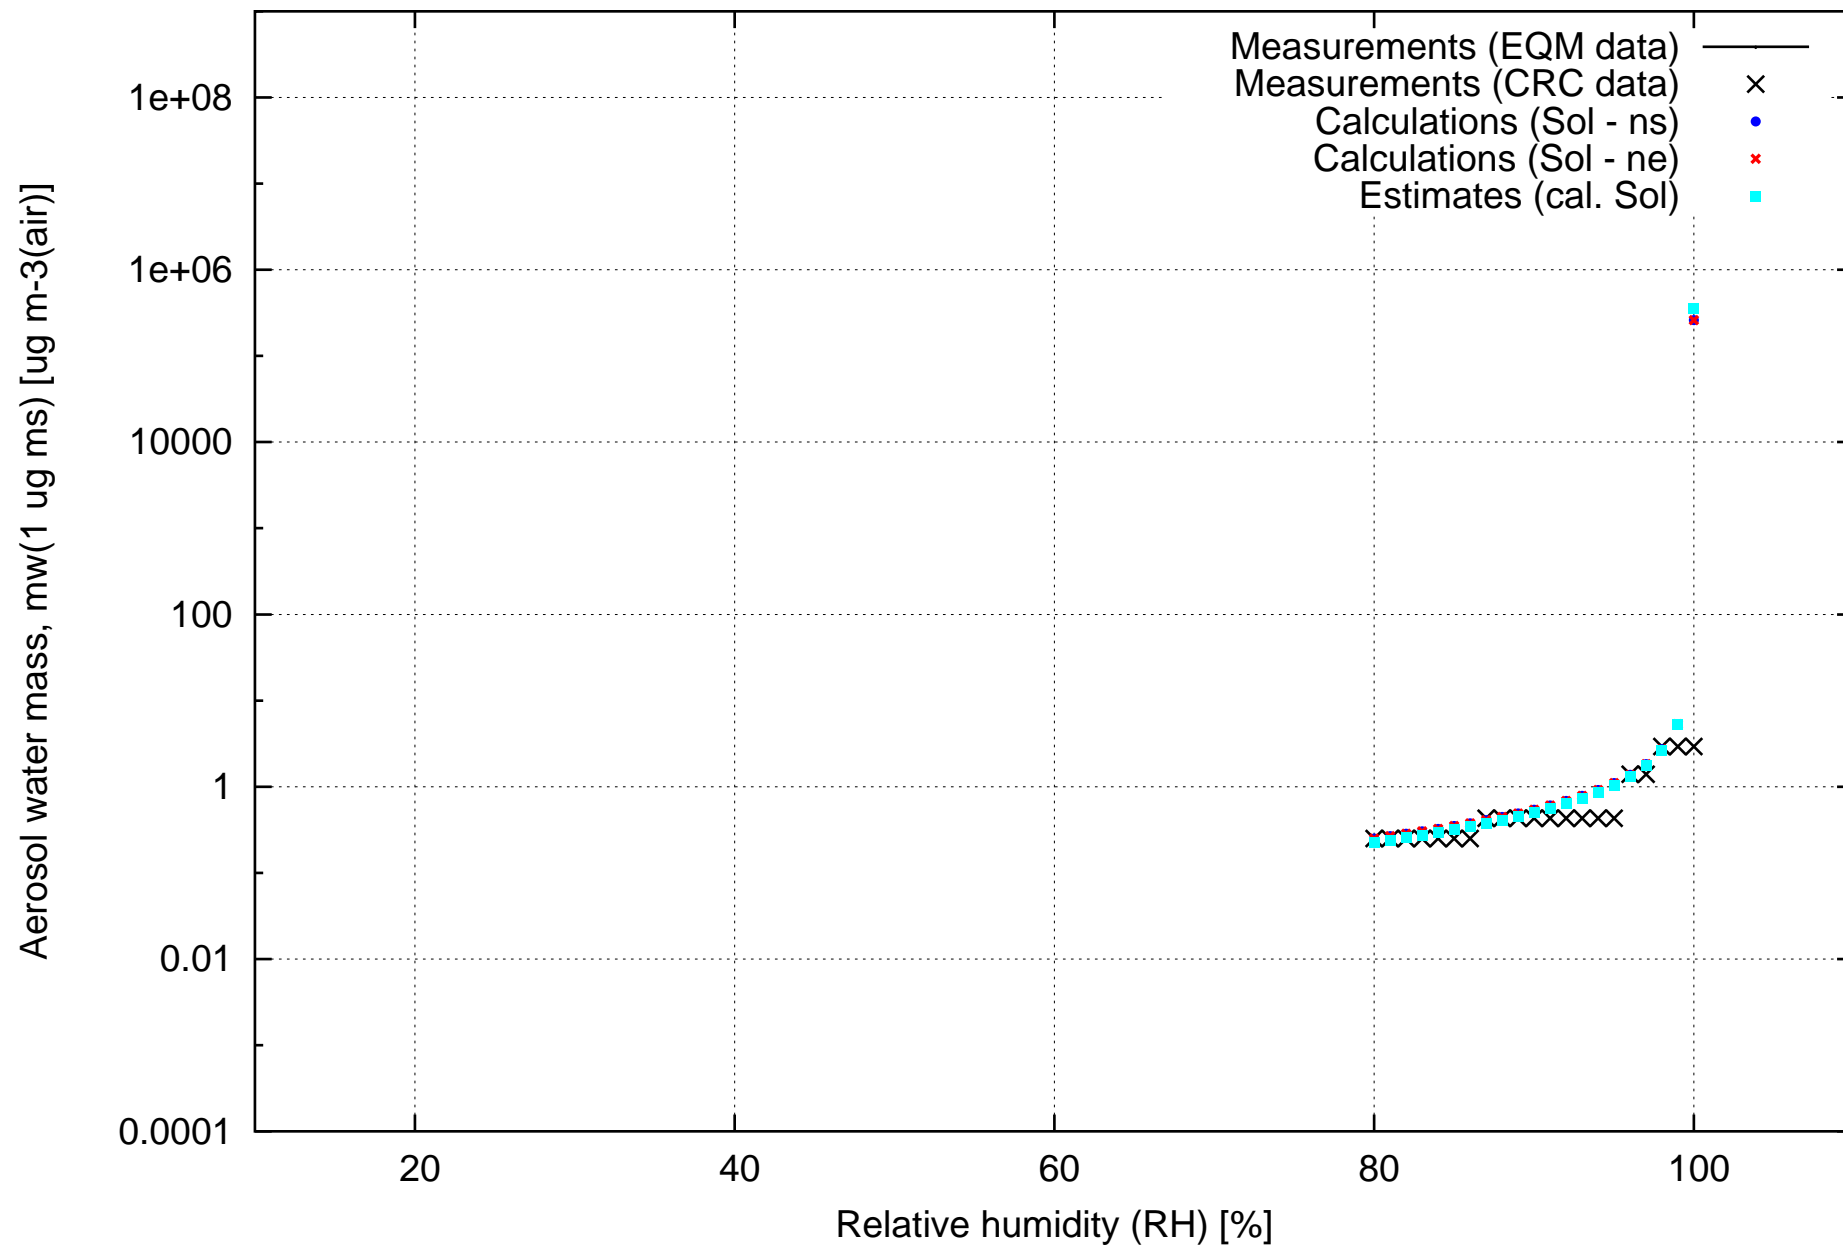

# Solute - dummy

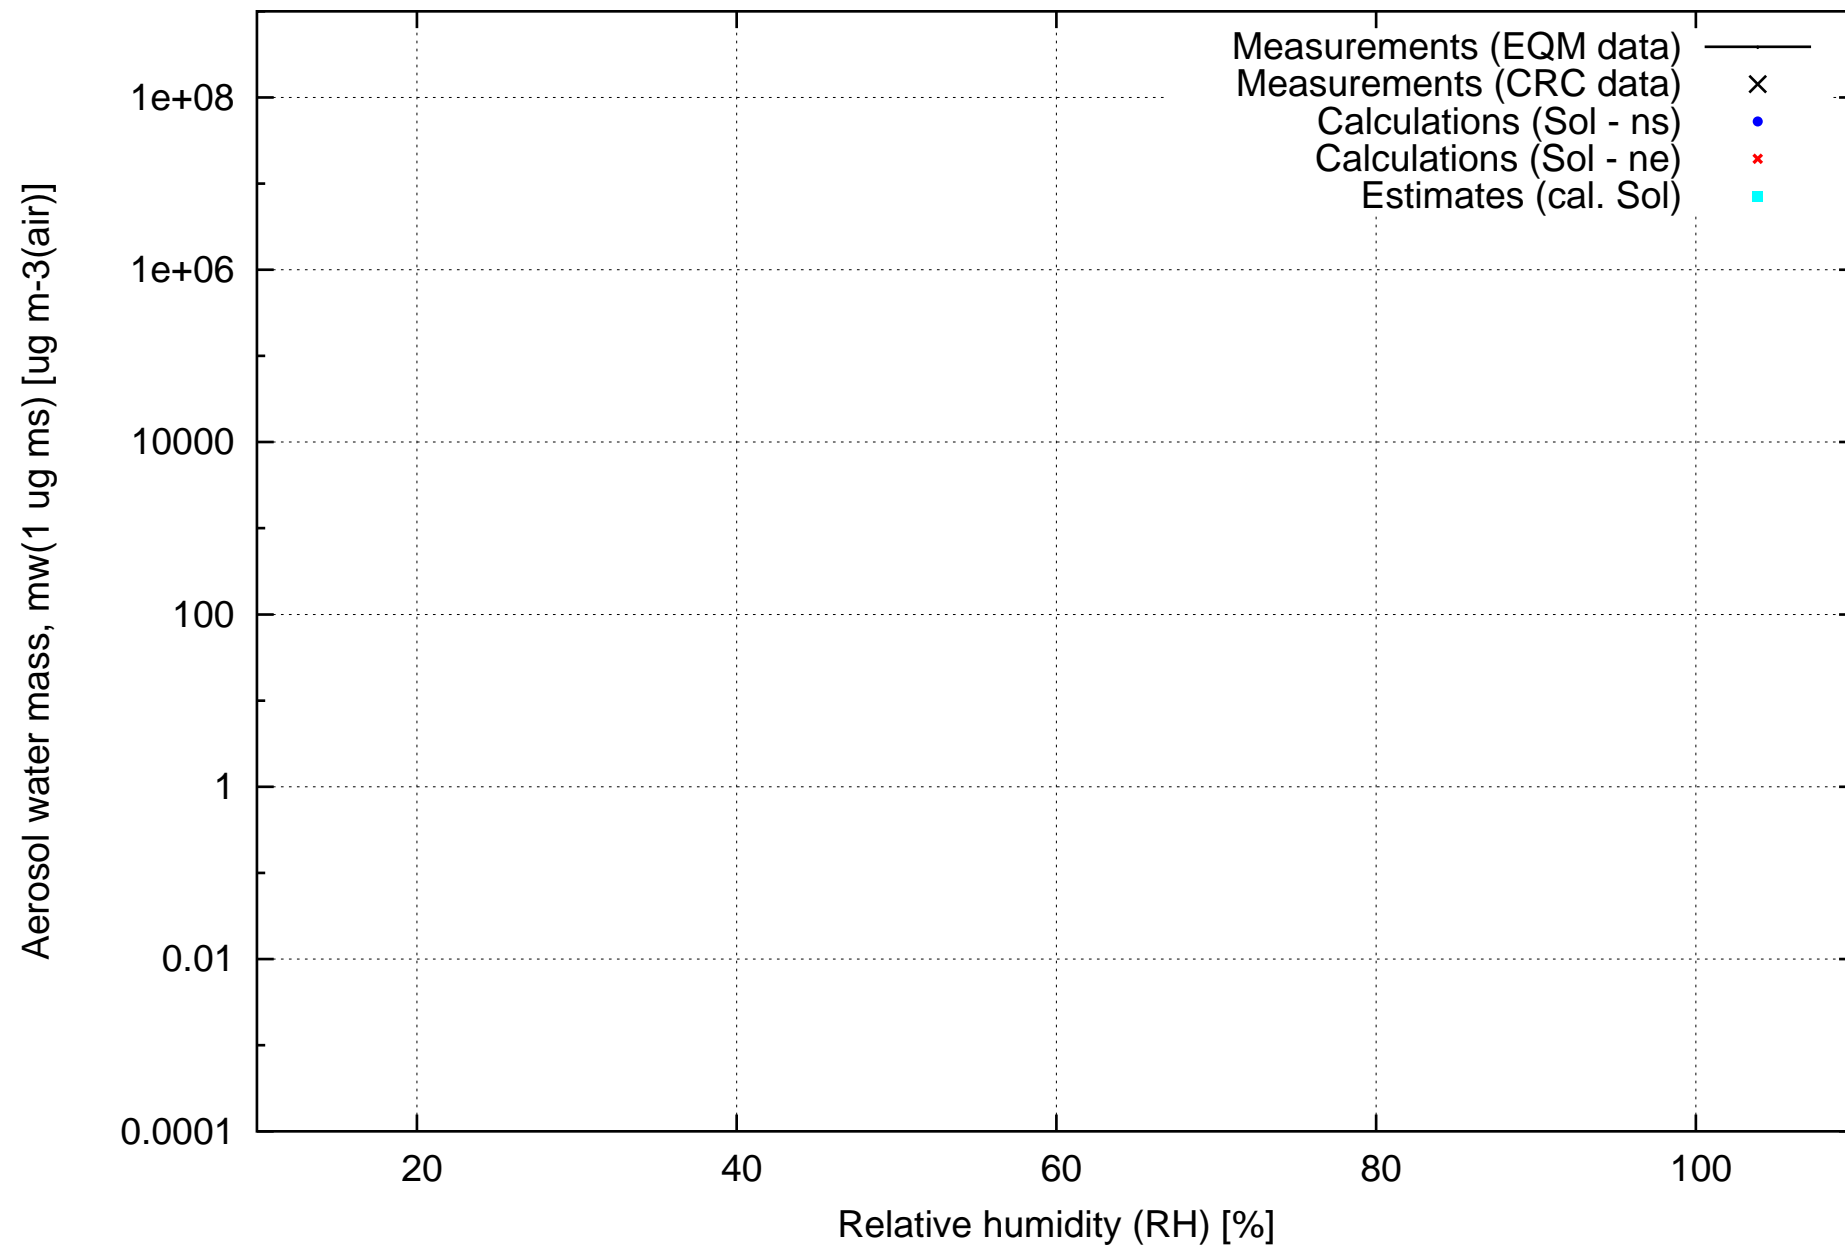

Solute - dummy

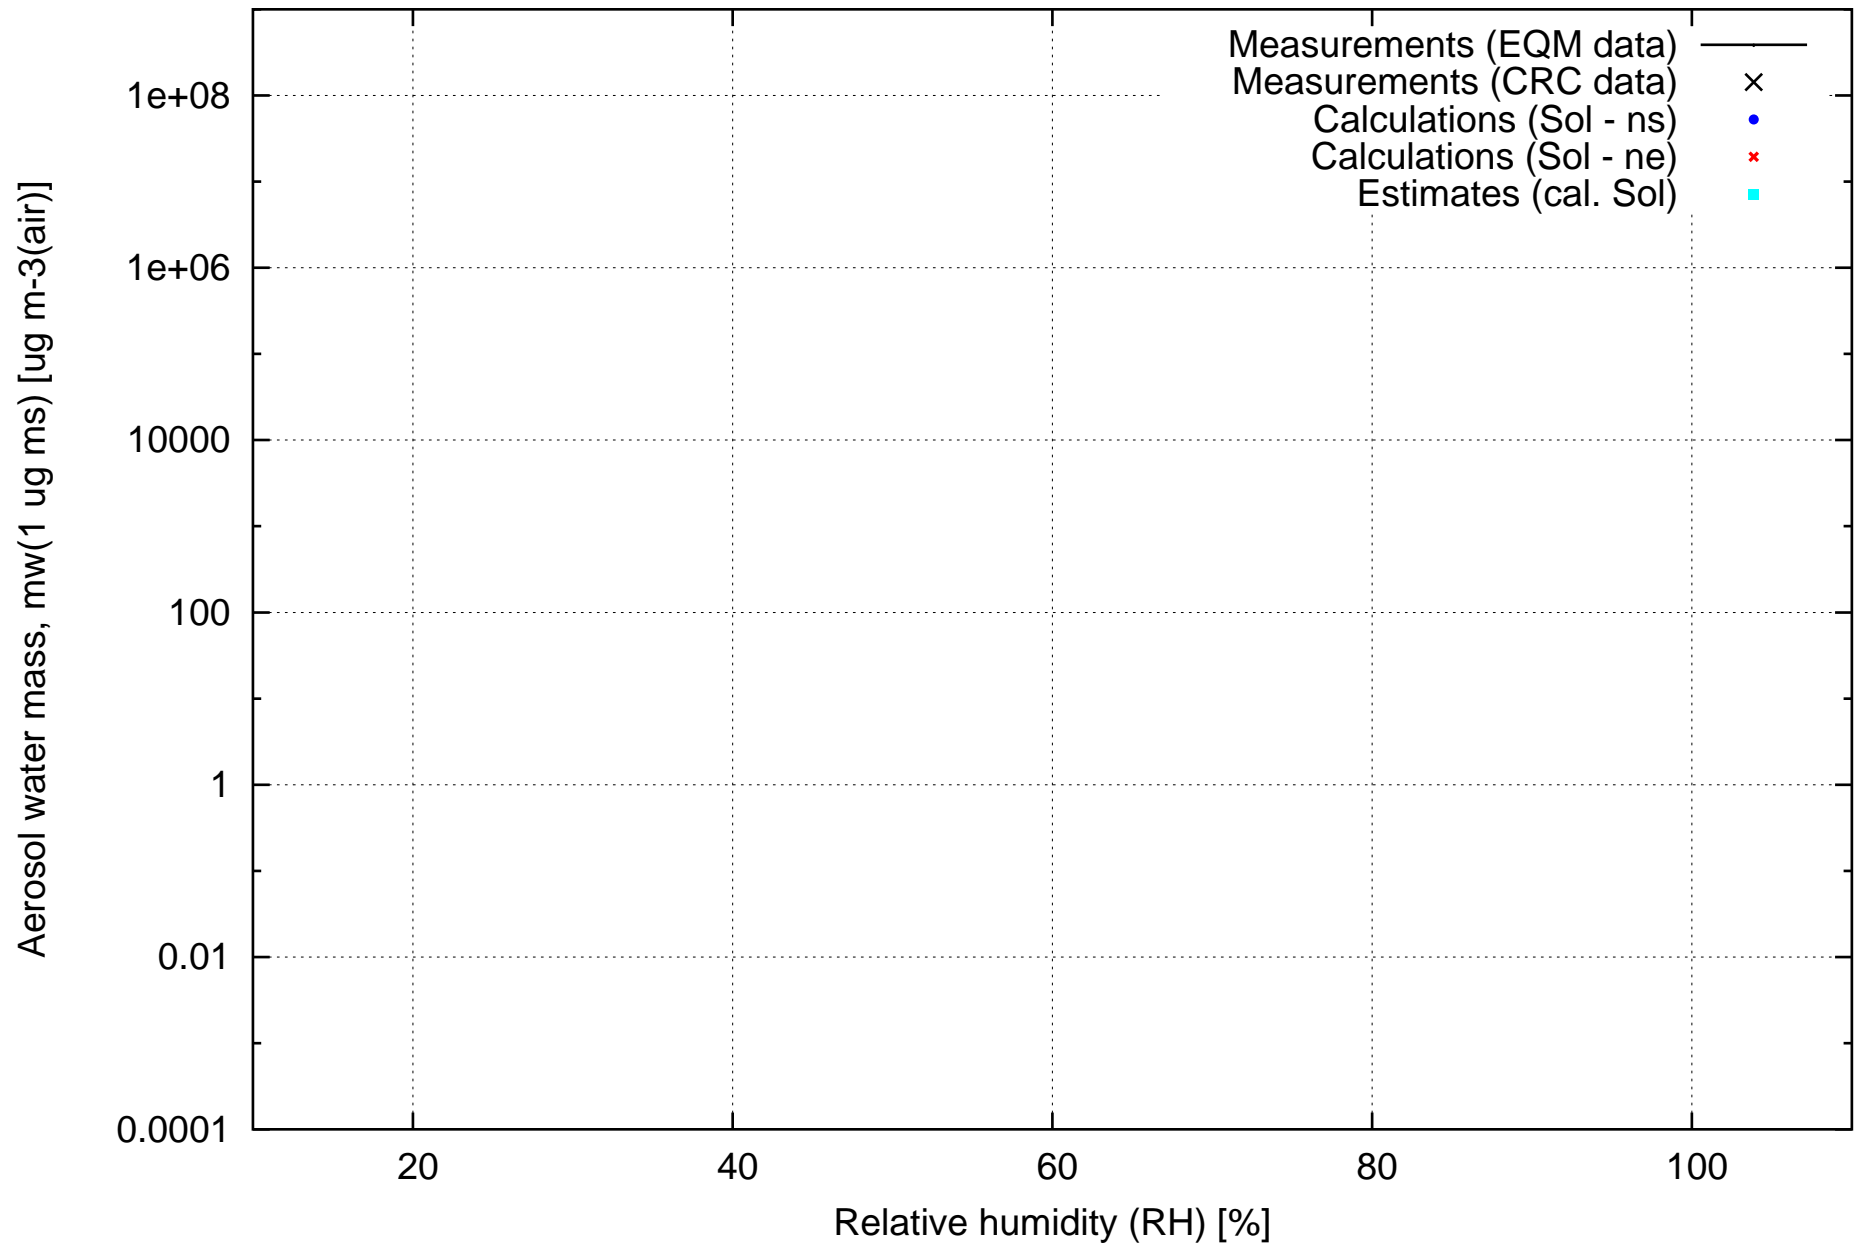

Solute - dummy



Solute - dummy



# Solute - dummy



# Solute - dummy



# Solute - dummy



Supplement: Supplementary file 2 [file acp-7-3163-2007-supplement.zip]
