# Supplementary material for: Reformulating atmospheric aerosol thermodynamics and hygroscopic growth into fog, haze and clouds
Source: Copernicus journal article supplement (doi:10.5194/acp-7-3163-2007), 2007-06-20
Supplement: Supplementary file 5 [file acp-7-3163-2007-supplement.zip]

## Electronic Supplement<sup>1</sup>

### 1 Single solute molalities and water uptake

Single solute molalities and the associated water uptake are shown in Fig. (A1a) and (A1b) for all compounds listed in Table 1, complementing Fig. (2a) and (2b).

### 2 Equilibrium Thermodynamics

To derive the standard definitions and relevant equations for chemical equilibrium we follow the “classical” thermodynamics (e.g. Denbigh, 1981; Seinfeld and Pandis, 1998; Wexler and Potukuchi, 1998). “Classical”, since water is generally omitted in equilibrium equations unless explicitly involved in the reaction, based on the assumption that water is neither consumed nor produced. However, when hydration is involved, water is consumed and released, which causes inconsistencies in the standard treatment.

#### 2.1 Gibb’s free energy

The general condition for thermodynamical and chemical equilibrium is that the total free energy of the system – usually referred to as Gibb’s free energy ( $G$ ) – is at a minimum, which implies that  $dG = 0$  (see e.g. Denbigh, 1981).

The Gibb’s free energy expresses the sum of total free energies of the system,  $G \equiv U + PV - TS$ , by which the first term on the rhs denotes internal energy ( $U$ ), and is always positive. The second term accounts for the energy associated with either changing a volume ( $V$ ) at constant pressure ( $P$ ), or by changing the pressure at constant volume; and can be either negative (e.g. by expansion) or positive (e.g. by compression). The third term accounts for the energy that is associated with the degree of order of the system at given temperature ( $T$ ) and entropy ( $S$ ), and is always positive.

Any differential change in  $G$  yields

$$dG = dU + PdV + VdP - TdS - SdT = 0, \quad (1)$$

by which at constant temperature ( $dT = 0$ ) the entropy term ( $SdT$ ) disappears. And at constant pressure ( $dP = 0$ ), Eq. (1) reduces to

$$dG|_{T,P} = dU + PdV - TdS = 0. \quad (2)$$

With the definition of the internal energy, known as the Euler equation,  $U = TS - PV + \mu n$ , any differential change in  $U$  leads to (at constant  $T$  and  $P$ )

$$dU|_{T,P} = TdS - PdV + \mu dn, \quad (3)$$

<sup>1</sup>provides (1) additional figures and (2) the derivation of the standard definitions of equilibrium thermodynamics referred to in: “Reformulating atmospheric aerosol thermodynamics and hygroscopic growth into haze and clouds” (Metzger and Lelieveld, 2007).

where  $SdT - VdP + nd\mu = 0$  is known as the Gibbs-Duhem equation. It shows that three intensive variables are not independent ( $T, P$ , and  $\mu$  are intensive, the others extensive) – if one is known, the value of the third can be determined from the Gibbs-Duhem equation.

Upon substitution of Eq. (3) in Eq. (2), i.e. eliminating  $dU$  with the Gibbs-Duhem relation, we can express  $dG$  in terms of a concentration change, which is zero when the  $j$ th – chemical reaction that forms compound  $j$  reaches equilibrium, i.e.

$$dG|_{T,P} = \sum_{i=1}^k \mu_{ij} n_{ij} = 0; \quad (4)$$

$n_{ij}$  denotes the amount of the  $i$ th – of  $k$  – components and  $\mu_{ij}$  its chemical potential.

#### 2.2 Equilibrium constant

For the  $j$ th – chemical reaction, the amount of each component is  $n_{ij} = n_{ij}^o + \nu_{ij} \varepsilon_j$ , where  $n_{ij}^o$  is the initial amount of each component;  $\nu_{ij}$  is their stoichiometric coefficient and  $\varepsilon_j$  their reaction coordinate.

Taking the derivative of  $n_{ij}$ , i.e.  $dn_{ij} = \nu_{ij} d\varepsilon_j$  with  $d\varepsilon_j = 1$ , when substituted into Eq. (4) gives

$$\sum_{i=1}^k \mu_{ij} dn_{ij} = 0. \quad (5)$$

The chemical potentials  $\mu_{ij}$  are usually expressed in terms of their activities  $a_{ij}$ , i.e.  $\mu_{ij} = \mu_{ij}^o + RT \ln a_{ij}$ .  $\mu_{ij}^o$  denotes the chemical potential at a standard state and equals the partial molar Gibbs free energy  $g_{ij}^o$  with units kilo Joule per mol [ $\text{kJ/mol}$ ];  $R$  [ $\text{J/mol/K}$ ] denotes the universal gas constant,  $T$  [ $\text{K}$ ] the temperature. Upon substitution into Eq. (5), i.e.

$$\sum_{i=1}^k \nu_{ij} g_{ij}^o + RT \times \sum_{i=1}^k \nu_{ij} \ln a_{ij} = 0. \quad (6)$$

Eq. (6) yields upon rearranging and exponentiation, with expressing the sum of the logarithm as their product, the equilibrium constant ( $K_{c,j}$ ) for the  $j$ th – chemical reaction at given temperature ( $T$ ), i.e.

$$K_{c,j} = \exp\left(-\sum_{i=1}^k \nu_{ij} g_{ij}^o / RT\right) = \prod_{i=1}^k a_{ij}^{\nu_{ij}}. \quad (7)$$

The temperature dependency of the equilibrium constant is calculated from the van’t Hoff equation (now dropping the indices  $ij$ ), i.e.

$$d \ln K_c / dT = \Delta H_f(T) / (RT^2), \quad (8)$$

where  $\Delta H_f(T)$  is the standard molar enthalpy change of formation of the  $j$ th – compound at temperature  $T$ . For a small temperature change  $\Delta H_f$  can be approximated by

$$\Delta H_f(T) = \Delta H_f^o(T^o) + \Delta C_p^o(T - T^o). \quad (9)$$

$\Delta H_f^o(T^o)$  [J/mol] denotes the standard molar enthalpy change of the reaction at a reference temperature  $T^o$ , (usually the standard-state temperature 298.15 K), and  $\Delta Cp^o(T - T^o)$  the change of the standard molar heat capacity at constant pressure compared to  $T^o$ ; it is implicitly assumed here that  $\Delta H_f^o$  and  $\Delta Cp^o$  are constant over the temperature range  $T - T^o$ .

Substituting Eq. (9) into Eq. (8) and integrating over  $T - T^o$ , the temperature dependency of the equilibrium constant is obtained, i.e.

$$K_c(T) = K_c^o(T^o) \times \exp \left[ -\Delta H_f^o / (RT^o) \times (T^o/T - 1) - \Delta Cp^o / R (1 + \ln(T^o/T) - T^o/T) \right]. \quad (10)$$

The data on  $\Delta G^o$ ,  $\Delta H_f^o$ , and  $\Delta Cp^o$  (needed to calculate equilibrium constants and their temperature dependency) can be obtained for instance from the CRC Handbook of Chemistry and Physics (2006).

Finally, the activities used in Eq. (7) of single-salt solutions consist of  $\pm$ -ion pairs, by which the  $\pm$ -ion pair activity is usually expressed as (Robinson and Stokes, 1965)

$$a_{\pm}^{\nu_{\pm}} = (\gamma_{\pm} m_{\pm})^{\nu_{\pm}} = a_{+}^{\nu_{+}} a_{-}^{\nu_{-}} = (\gamma_{+} m_{+})^{\nu_{+}} (\gamma_{-} m_{-})^{\nu_{-}} = \gamma_{\pm}^{\nu_{\pm}} m_{+}^{\nu_{+}} m_{-}^{\nu_{-}}. \quad (11)$$

$\nu_{+}$  and  $\nu_{-}$  denote the number of moles of cations and anions per mole of solute ( $\pm$ -ion pair) dissociating completely into  $\nu_{\pm} = \nu_{+} + \nu_{-}$  ions.  $m_{\pm}$ ,  $m_{+}$ ,  $m_{-}$  denote the corresponding molalities, i.e. the concentration of the ions in the solution, by which the molality is defined as mole solute per kg solvent (water) [mol/kg(H<sub>2</sub>O)].  $\gamma_{\pm}, \gamma_{+}, \gamma_{-}$  are the corresponding mean molal binary activity coefficient [kg(H<sub>2</sub>O)/mol] of the  $\pm$ -ion pair, and the activity coefficients of the cations and anions, respectively. The activity coefficients are introduced to correct the solution molalities for non-ideality resulting from incomplete dissociation and ion-ion interactions at higher solute concentrations.

Eq. (7) becomes in terms of activity coefficients and molalities

$$K_{c,j} = \prod_{i=1}^k (\gamma_{ij} m_{ij})^{\nu_{ij}}, \quad (12)$$

where the subscript  $i$  denotes  $i$ th- component of the  $j$ th- compound (reaction).

Since  $K_{c,j}$  is a characteristic constant for the  $j$ th- chemical equilibrium reaction and usually determined with the aid of Eq. (7) from experimentally gained thermodynamic data, Eq. (12) enables to relate and calculate various solute properties that are difficult to measure, for instance solute activities ( $a_{ij}$ ), molalities ( $m_{ij}$ ) and activity coefficients ( $\gamma_{ij}$ ) of  $\pm$ -ion pairs or of the individual cations and anions.

However, the summation or product over  $i$  is usually only made over the  $k$ -components that form the  $j$ th- compound, and water is usually omitted, as long it is neither consumed nor produced – even when being essential for the equilibrium reaction to take place and consumed by the solute hydration.

### 2.2.1 Example

For the example in Fig. 1b the stoichiometrical (i.e. on a molar basis) reaction of the dissociation of crystalline ( $cr$ ) sodium chloride (NaCl)  $\pm$ -ion pair into the aqueous ( $aq$ ) sodium (Na<sup>+</sup>) cation and chloride (Cl<sup>-</sup>) anion is

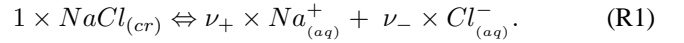

The corresponding equilibrium constant for this  $j$ th- reaction (R1) with its  $i$ th- components gives

$$K_{NaCl_{(cr)}} = [Na_{(aq)}^{+}]^{\nu_{+}} \times [Cl_{(aq)}^{-}]^{\nu_{-}} \times \gamma_{+}^{\nu_{+}} \gamma_{-}^{\nu_{-}}. \quad (K1)$$

### 2.3 Solubility

Although the above also applies to the calculation of the solubility constants, there are however some peculiarities about solubility equilibria that help apply important simplifications, despite the fact that solubility calculations can become quite complex, especially when involving complex-ion equilibria which even can dissolve insoluble salts.

First, at equilibrium the solution is saturated, i.e. it contains the maximum concentration of ions that can exist in equilibrium with its solid (crystalline) phase. In this case the ion concentrations of Na<sup>+</sup><sub>(aq)</sub> and Cl<sup>-</sup><sub>(aq)</sub> are sufficiently high so that the rate at which precipitation occurs exactly balances the rate at which NaCl<sub>(cr)</sub> dissolves. Thus, there is no change in the concentration of these ions with time when the reaction is at equilibrium. The amount of solute that must be added to a given volume of solvent to form a saturated solution is called the solubility of the solute. In other words, if the system is at equilibrium the ion product, i.e. the product of the concentrations of the ions, equals the solubility product for the solute. If the ion product is larger or smaller than the solubility product for the solute, the system is not at equilibrium, but can rapidly adjust according to Le Chatelier's principle, so that equilibrium is restored after the excess ions precipitate from solution as a solid (NaCl<sub>(cr)</sub>), or solids dissolves until any deficit in the ion product is compensated.

The solubility constant expression for reaction (R1) can be calculated from (K1) from its product with the concentration of the solid, and the concentration of a solid (e.g. NaCl<sub>(cr)</sub>) is calculated from its density and its molar mass. For instance, for solid NaCl<sub>(cr)</sub>, i.e.

$$\frac{\rho_{NaCl_{(cr)}}}{1 \text{ cm}^3} = \frac{2.17 \text{ g NaCl}_{(cr)}}{1 \text{ cm}^3} \times \frac{1 \text{ cm}^3}{1 \text{ mL}} \times \frac{1000 \text{ mL}}{1 \text{ L}} \times \frac{1 \text{ mol NaCl}_{(cr)}}{58.44 \text{ g NaCl}_{(cr)}} = 37.13 \text{ mol NaCl}_{(cr)} / \text{L}. \quad (13)$$

Since the concentration of the solid is constant, which has no effect on the equilibrium, it is built into the solubility constant for the equilibrium reaction. According to (K1) we have

$$K_{sp, \text{NaCl}_{cr}} = K_{\text{NaCl}_{(cr)}} \times m_{\text{NaCl}_{(cr)}}. \quad (\text{K2})$$

(K2) is a constant and proportional to the solubility of the salt and hence called the solubility product equilibrium constant ( $K_{sp, \text{NaCl}_{cr}}$ ). For reaction (R1),  $K_{sp, \text{NaCl}_{(cr)}}(T^o) = 37.661 \text{ [mol}^2/\text{kg}^2]$  with constants  $a = -\Delta H_f^o/(RT^o) = -1.56$  and  $b = \Delta C_p^o/R = 16.9$ , needed to calculate the temperature dependency with Eq. (10);  $RT^o = 8.314 \text{ [J/mol/K]} \times 298.15 \text{ [K]} = 2.479 \text{ [J/mol]}$ .

The solubility product constant requires that  $\nu_+$  cations ( $\text{Na}_{(aq)}^+$ ) are released with  $\nu_-$  anions ( $\text{Cl}_{(aq)}^-$ ), because there is no other source of either ion in this solution, so that the concentrations of the ions at equilibrium are the same

$$a_{\pm}^{\nu_{\pm}} = a_+^{\nu_+} = a_-^{\nu_-}. \quad (14)$$

In general, it is assumed that salt solutes dissociate into their ions when dissolved in water. Ionic compounds dissolve if the energy released from the ions interactions with water molecules compensates for both a) the energy needed to break the ionic bonds of the solid and b) the energy required to separate the solvent (water) molecules.

## 2.4 Nernst equation

For charged species electrical forces must be considered. The potential for an electrochemical reaction is described by (Nernst, 1889)

$$E = E^o - R T / (z F) \ln(Q_c). \quad (15)$$

In the Nernst equation (15),  $E$  [V] is the electrochemical cell potential at some moment in time,  $E_o$  [V] is the cell potential for the reaction at standard-state conditions,  $R$  [J/mol/K] the ideal gas constant in joules per mole and Kelvin,  $T$  [K] the temperature in Kelvin,  $z$  [−] the number of moles of electrons transferred in the balanced equation for the reaction,  $F = 96484 \text{ [C/mol]}$  the Faraday-constant that expresses the charge on a mole of electrons (calculated from Avogadro's number and the charge on a single electron ( $F = 6.022045 \times 10^{23} [1/\text{mol}] \times 1.6021892 \times 10^{-19} [\text{As/e}^-]$ ), and  $Q_c$  [−] the reaction quotient. The magnitude of the cell potential is a measure of the driving force behind a reaction. The larger the value of the cell potential, the further the reaction is from equilibrium, while at equilibrium ( $\Delta G = 0$ ) the overall cell potential  $E$  [V] = 0. Since then the reaction quotient equals the equilibrium constant ( $Q_c = K_c$ ), the Nernst equation is related to the partial molar Gibbs free energy by

$$g^o = \pm z F E^o = RT \ln(K_c), \quad (16)$$

and can hence be used to measure the equilibrium constant for a reaction.

The condition that the overall cell potential is zero at equilibrium ( $E = 0$ ) implies electroneutrality. The ability of a binary solution (one solute and solvent) to conduct an electric current by the ions resulting from dissociation must be compensated by an ion flow that results from the dissociation of the solvent (water), for which two moles of water are consumed,  $2 \text{ H}_2\text{O}_{(aq)} \rightleftharpoons \text{H}_3\text{O}_{(aq)}^+ + \text{OH}_{(aq)}^-$ . Since measurements suggest that the ability of pure water to conduct an electrical current at 25 °C contains  $1.0 \times 10^{-7} [\text{mol/L}]$  moles per liter of each of these ions, i.e.  $[\text{H}_3\text{O}_{(aq)}^+] = [\text{OH}_{(aq)}^-] = 1.0 \times 10^{-7} [\text{mol/L}]$ . This product remains constant at equilibrium and yields the water dissociation equilibrium constant,  $K_w = 1.0 \times 10^{-14}$ ; one kilogram of pure water always contains  $1000 \text{ [g]}/M_{\text{H}_2\text{O}} \text{ [g/mol]} = 1000/18.015 = 55.5093 \text{ [mol]}$ .

Although  $K_w$  is defined in terms of the dissociation of water, this equilibrium constant expression is equally valid for solutions of acids and bases dissolved in water. Regardless of the source of the  $\text{H}_3\text{O}_{(aq)}^+$  and  $\text{OH}_{(aq)}^-$  ions in water, the product of the concentrations of these ions at equilibrium at 25 °C is  $1.0 \times 10^{-14} [\text{mol}^2\text{L}^{-2}]$ . Thus adding an acid or base to water therefore has an effect on the concentration of both the  $\text{H}_3\text{O}_{(aq)}^+$  and  $\text{OH}_{(aq)}^-$  ions; they can be hence related in terms of the definition of a negative of the logarithm by  $pH + pOH = 14$ , with  $pH = -\log [\text{H}_3\text{O}_{(aq)}^+]$  and  $pOH = -\log [\text{OH}_{(aq)}^-]$ .

Similarly, the discussion can be extended to acid/base-dissociation equilibria, including cation-acids and anion-bases, which yield  $pK_a$  and  $pK_b$  values that indicate the strength of the acid or base, respectively. However, for chemical reactions involving hydration the assumption that water can be omitted in equilibrium reactions does not hold, since water is actually consumed by hydration. Neglecting water in equilibrium reactions therefore introduces a conceptual problem and unnecessarily complicates the equations. In the present work we therefore reformulate chemical equilibrium to include water and exploit the implications for atmospheric aerosol modeling.

## References

- Chemical Rubber Company (CRC) Handbook of Chemistry and Physics, 86th Edition, Taylor and Francis Group LLC, 2004–2005, CD-ROM version 2006.
- Denbigh, K.: The Principles of Chemical Equilibrium, 4th ed., Cambridge Univ. Press, New York, 1981.
- Robinson, R. A. and Stokes, R. H.: Electrolyte solutions, Second Ed., Butterworths, London, 1965.
- Seinfeld, J. H. and Pandis, S. N.: Atmospheric chemistry and physics, J. Wiley and Sons, Inc., New York, 1998.
- Wexler, A. S. and Potukuchi, S.: Kinetics and Thermodynamics of Tropospheric Aerosols, Atmospheric Particles, John Wiley & Sons Ltd., 1998.

## Appendix A List of indices, symbols and chemical substances

**Table A1.** List of Indices.

| Abbreviation | Name                                                  |
|--------------|-------------------------------------------------------|
| $(cr)$       | crystalline                                           |
| $(aq)$       | aqueous                                               |
| $(g)$        | gaseous                                               |
| $+$          | superscript for “cation”                              |
| $-$          | superscript for “anion”                               |
| $\pm$        | superscript for “ion pair”                            |
| $^o$         | superscript for “standard state”                      |
| $i$          | subscript for “ $i$ th of $k$ -components”            |
| $j$          | subscript for “ $j$ th-compound or chemical reaction” |
| $k$          | subscript for “the total number of components”        |

**Table A2.** List of Symbols.

| Symbol      | Name                                                                               | Unit                   |
|-------------|------------------------------------------------------------------------------------|------------------------|
| $\nu_{ij}$  | Stoichiometric coefficient:<br>of $i$ th-component, $j$ th-reaction                | –                      |
| $\nu_+$     | of the cation                                                                      | –                      |
| $\nu_-$     | of the anion                                                                       | –                      |
| $\nu_{\pm}$ | of the ion-pair                                                                    | –                      |
| $E$         | Electrochemical cell potential                                                     | V                      |
| $E^o$       | Electrochemical cell potential<br>at standard state                                | V                      |
| $F$         | Faraday-constant                                                                   | C/mol                  |
| $G$         | Gibb’s free energy                                                                 | kJ                     |
| $H_f$       | Enthalpy of formation                                                              | kJ                     |
| $K_{c,j}$   | Equilibrium constant<br>( $j$ th-chemical reaction)                                | –                      |
| $K_c^o$     | Equilibrium constant<br>at standard state                                          | –                      |
| $K_{sp}$    | Solubility product constant                                                        | (mol/kg) $^{\nu_{ij}}$ |
| $pH$        | Acid-base indicator (potentia Hydrogenia)                                          | –                      |
| $pK_a$      | Acid indicator                                                                     | –                      |
| $pK_b$      | Base indicator                                                                     | –                      |
| $P$         | Pressure                                                                           | Pa                     |
| $Q_c$       | Reaction quotient                                                                  | –                      |
| $R$         | Universal gas constant                                                             | J/mol/K                |
| $S$         | Entropy                                                                            | J                      |
| $T$         | Temperature                                                                        | K                      |
| $T^o$       | Standard state temperature                                                         | K                      |
| $U$         | Internal energy                                                                    | kJ                     |
| $V$         | Volume                                                                             | m <sup>3</sup>         |
| $z$         | Number of moles of electrons transferred<br>(balanced equation of $j$ th-reaction) | –                      |

**Table A2.** List of Symbols (continued).

| Symbol           | Name                                                              | Unit           |
|------------------|-------------------------------------------------------------------|----------------|
| $\varepsilon_j$  | Reaction coordinate ( $j$ th-reaction)                            | –              |
| $n, n_{ij}$      | Number of moles                                                   | mol            |
| $n_{ij}^o$       | Initial amount (moles)                                            | mol            |
| $m_+$            | Cation molality                                                   | mol/kg         |
| $m_-$            | Anion molality                                                    | mol/kg         |
| $m_{\pm}$        | Solute (ion-pair) molality                                        | mol/kg         |
| $\mu$            | Chemical potential                                                | kJ/mol         |
| $\mu_{ij}^o$     | Standard state chemical potential                                 | kJ/mol         |
| $\gamma_+$       | (Molal) cation activity coefficient                               | kg/mol         |
| $\gamma_-$       | (Molal) anion activity coefficient                                | kg/mol         |
| $\gamma_{\pm}$   | Mean (molal) binary activity coeff.                               | kg/mol         |
| $a_{ij}$         | Activity of $i$ th-component                                      | –              |
| $a_{\pm}$        | Ion-pair activity of $j$ th-compound                              | –              |
| $g_{ij}^o$       | (Partial) molar Gibb’s free energy<br>at standard state           | kJ/mol         |
| $d\varepsilon_j$ | Differential change in:<br>reaction coordinate ( $j$ th-reaction) | –              |
| $dC_p$           | heat capacity                                                     | J/mol          |
| $dG$             | Gibb’s free energy                                                | kJ             |
| $dH_f$           | enthalpy of formation                                             | kJ             |
| $d\mu$           | chemical potential                                                | kJ/mol         |
| $dn$             | number of moles                                                   | mol            |
| $dP$             | pressure                                                          | Pa             |
| $dS$             | entropy                                                           | J              |
| $dT$             | temperature                                                       | K              |
| $dU$             | internal energy                                                   | kJ             |
| $dV$             | volume                                                            | m <sup>3</sup> |
| $\Delta C_p^o$   | Total change in:<br>standard state molar heat capacity            | kJ/mol         |
| $\Delta G^o$     | standard state molar Gibb’s free energy                           | kJ/mol         |
| $\Delta H_f^o$   | molar enthalpy of formation<br>at standard state                  | kJ/mol         |

**Table A3.** List of Chemical Substances

| Cations(+) and Anions(-)                                                                          | Name         |
|---------------------------------------------------------------------------------------------------|--------------|
| H <sup>+</sup>                                                                                    | Hydrogen     |
| NH <sub>4</sub> <sup>+</sup>                                                                      | Ammonium     |
| Na <sup>+</sup>                                                                                   | Sodium       |
| K <sup>+</sup>                                                                                    | Potassium    |
| Ca <sup>2+</sup>                                                                                  | Calcium      |
| Mg <sup>2+</sup>                                                                                  | Magnesium    |
| Fe <sup>2+/3+</sup>                                                                               | Iron(II,III) |
| PO <sub>4</sub> <sup>3-</sup>                                                                     | Phosphate    |
| SO <sub>4</sub> <sup>2-</sup>                                                                     | Sulfate      |
| HSO <sub>4</sub> <sup>-</sup>                                                                     | Bisulfate    |
| NO <sub>3</sub> <sup>-</sup>                                                                      | Nitrate      |
| Cl <sup>-</sup>                                                                                   | Chloride     |
| Br <sup>-</sup>                                                                                   | Bromide      |
| I <sup>-</sup>                                                                                    | Iodide       |
| CO <sub>3</sub> <sup>2-</sup>                                                                     | Carbonate    |
| HCO <sub>3</sub> <sup>-</sup>                                                                     | Bi-carbonate |
| OH <sup>-</sup>                                                                                   | Hydroxide    |
| CHO <sub>2</sub> <sup>-</sup> = H(COO) <sup>-</sup>                                               | Formate      |
| C <sub>2</sub> H <sub>3</sub> O <sub>2</sub> <sup>-</sup> = CH <sub>3</sub> (COO) <sup>-</sup>    | Acetate      |
| C <sub>2</sub> O <sub>4</sub> <sup>2-</sup> = (COO) <sub>2</sub> <sup>-</sup>                     | Oxalate      |
| C <sub>6</sub> H <sub>5</sub> O <sub>7</sub> <sup>3-</sup> = (HO)C(COO) <sub>3</sub> <sup>-</sup> | Citrate      |

**Table A3.** List of Chemical Substances (continued)

| Ammonium salts                                                                                                          | Name                 |
|-------------------------------------------------------------------------------------------------------------------------|----------------------|
| (NH <sub>4</sub> ) <sub>3</sub> PO <sub>4</sub>                                                                         | Ammonium phosphate   |
| (NH <sub>4</sub> ) <sub>2</sub> SO <sub>4</sub>                                                                         | Ammonium sulfate     |
| NH <sub>4</sub> HSO <sub>4</sub>                                                                                        | Ammonium bisulfate   |
| NH <sub>4</sub> NO <sub>3</sub>                                                                                         | Ammonium nitrate     |
| NH <sub>4</sub> Cl                                                                                                      | Ammonium chloride    |
| NH <sub>4</sub> Br                                                                                                      | Ammonium bromide     |
| NH <sub>4</sub> I                                                                                                       | Ammonium iodide      |
| (NH <sub>4</sub> ) <sub>2</sub> CO <sub>3</sub>                                                                         | Ammonium carbonate   |
| NH <sub>4</sub> HCO <sub>3</sub>                                                                                        | Ammonium bicarbonate |
| NH <sub>4</sub> OH                                                                                                      | Ammonium hydroxide   |
| NH <sub>4</sub> CHO <sub>2</sub> = H(COONH <sub>4</sub> )                                                               | Ammonium formate     |
| NH <sub>4</sub> C <sub>2</sub> H <sub>3</sub> O <sub>2</sub> = CH <sub>3</sub> (COONH <sub>4</sub> )                    | Ammonium acetate     |
| (NH <sub>4</sub> ) <sub>2</sub> C <sub>2</sub> O <sub>4</sub> = (COONH <sub>4</sub> ) <sub>2</sub>                      | Ammonium oxalate     |
| (NH <sub>4</sub> ) <sub>2</sub> HC <sub>6</sub> H <sub>5</sub> O <sub>7</sub> = (HO)C(COONH <sub>4</sub> ) <sub>3</sub> | Ammonium citrate     |

**Table A3.** List of Chemical Substances (continued)

| Acids                                                                   | Name              |
|-------------------------------------------------------------------------|-------------------|
| H <sub>3</sub> PO <sub>4</sub>                                          | Phosphoric acid   |
| H <sub>2</sub> SO <sub>4</sub>                                          | Sulfuric acid     |
| HNO <sub>3</sub>                                                        | Nitric acid       |
| HCl                                                                     | Hydrochloric acid |
| HBr                                                                     | Hydrogen bromide  |
| HI                                                                      | Hydrogen iodide   |
| H <sub>2</sub> CO <sub>3</sub>                                          | Carbonic acid     |
| H <sub>2</sub> O                                                        | Water             |
| CH <sub>2</sub> O <sub>2</sub> = H(COOH)                                | Formic acid       |
| C <sub>2</sub> H <sub>4</sub> O <sub>2</sub> = CH <sub>3</sub> (COOH)   | Acetic acid       |
| C <sub>2</sub> H <sub>2</sub> O <sub>4</sub> = (COOH) <sub>2</sub>      | Oxalic acid       |
| C <sub>6</sub> H <sub>8</sub> O <sub>7</sub> = (HO)C(COOH) <sub>3</sub> | Citric acid       |

**Table A3.** List of Chemical Substances (continued)

| Sodium salts                                                                             | Name               |
|------------------------------------------------------------------------------------------|--------------------|
| Na <sub>3</sub> PO <sub>4</sub>                                                          | Sodium phosphate   |
| Na <sub>2</sub> SO <sub>4</sub>                                                          | Sodium sulfate     |
| NaHSO <sub>4</sub>                                                                       | Sodium bisulfate   |
| NaNO <sub>3</sub>                                                                        | Sodium nitrate     |
| NaCl                                                                                     | Sodium chloride    |
| NaBr                                                                                     | Sodium bromide     |
| NaI                                                                                      | Sodium iodide      |
| Na <sub>2</sub> CO <sub>3</sub>                                                          | Sodium carbonate   |
| NaHCO <sub>3</sub>                                                                       | Sodium bicarbonate |
| NaOH                                                                                     | Sodium hydroxide   |
| NaCHO <sub>2</sub> = H(COONa)                                                            | Sodium formate     |
| NaC <sub>2</sub> H <sub>3</sub> O <sub>2</sub> = CH <sub>3</sub> (COONa)                 | Sodium acetate     |
| Na <sub>2</sub> C <sub>2</sub> O <sub>4</sub> = (COONa) <sub>2</sub>                     | Sodium oxalate     |
| Na <sub>3</sub> C <sub>6</sub> H <sub>5</sub> O <sub>7</sub> = (HO)C(COONa) <sub>3</sub> | Sodium citrate     |

**Table A3.** List of Chemical Substances (continued)

| Potassium salts                | Name                  |
|--------------------------------|-----------------------|
| $K_3PO_4$                      | Potassium phosphate   |
| $K_2SO_4$                      | Potassium sulfate     |
| $KHSO_4$                       | Potassium bisulfate   |
| $KNO_3$                        | Potassium nitrate     |
| KCl                            | Potassium chloride    |
| KBr                            | Potassium bromide     |
| KI                             | Potassium iodide      |
| $K_2CO_3$                      | Potassium carbonate   |
| $KHCO_3$                       | Potassium bicarbonate |
| KOH                            | Potassium hydroxide   |
| $KCHO_2 = H(COOK)$             | Potassium formate     |
| $KC_2H_3O_2 = CH_3(COOK)$      | Potassium acetate     |
| $K_2C_2O_4 = (COOK)_2$         | Potassium oxalate     |
| $K_3C_6H_5O_7 = (HO)C(COOK)_3$ | Potassium citrate     |

**Table A3.** List of Chemical Substances (continued)

| Calcium salts       | Name              |
|---------------------|-------------------|
| $Ca_3(PO_4)_2$      | Calcium phosphate |
| $CaSO_4$            | Calcium sulfate   |
| $Ca(NO_3)_2$        | Calcium nitrate   |
| $CaCl_2$            | Calcium chloride  |
| $CaBr_2$            | Calcium bromide   |
| $CaI_2$             | Calcium iodide    |
| $CaCO_3$            | Calcium carbonate |
| $Ca(OH)_2$          | Calcium hydroxide |
| $Ca(CHO_2)_2$       | Calcium formate   |
| $Ca(C_2H_3O_2)_2$   | Calcium acetate   |
| $CaC_2O_4$          | Calcium oxalate   |
| $Ca_3(C_6H_5O_7)_2$ | Calcium citrate   |

**Table A3.** List of Chemical Substances (continued)

| Magnesium salts     | Name                |
|---------------------|---------------------|
| $Mg_3(PO_4)_2$      | Magnesium phosphate |
| $MgSO_4$            | Magnesium sulfate   |
| $Mg(NO_3)_2$        | Magnesium nitrate   |
| $MgCl_2$            | Magnesium chloride  |
| $MgBr_2$            | Magnesium bromide   |
| $MgI_2$             | Magnesium iodide    |
| $MgCO_3$            | Magnesium carbonate |
| $Mg(OH)_2$          | Magnesium hydroxide |
| $Mg(CHO_2)_2$       | Magnesium formate   |
| $Mg(C_2H_3O_2)_2$   | Magnesium acetate   |
| $MgC_2O_4$          | Magnesium oxalate   |
| $Mg_3(C_6H_5O_7)_2$ | Magnesium citrate   |

**Table A3.** List of Chemical Substances (continued)

| Iron salts          | Name                |
|---------------------|---------------------|
| $FePO_4$            | Iron(III) phosphate |
| $Fe_2(SO_4)_3$      | Iron(III) sulfate   |
| $Fe(NO_3)_3$        | Iron(III) nitrate   |
| $FeCl_3$            | Iron(III) chloride  |
| $FeBr_3$            | Iron(III) bromide   |
| $FeI_3$             | Iron(III) iodide    |
| $FeCO_3$            | Iron(II) carbonate  |
| $Fe(OH)_3$          | Iron(III) hydroxide |
| $Fe(CHO_2)_3$       | Iron(III) formate   |
| $FeOH(C_2H_3O_2)_2$ | Iron(III) acetate   |
| $Fe_2(C_2O_4)_3$    | Iron(III) oxalate   |
| $FeC_6H_5O_7$       | Iron(III) citrate   |

**Table A4.** List of Chemical Substances (continued)

| Non salt solutes     | Name       |
|----------------------|------------|
| $NH_3$               | Ammonia    |
| $(CH_3)_2CO$         | Acetone    |
| $CH_3OH$             | Methanol   |
| $CH_3CH_2OH$         | Ethanol    |
| $C_6H_{12}O_6$       | D-Fructose |
| $CH_2(CHOH)_4CH_2OH$ | D-Mannitol |
| $C_{12}H_{22}O_{11}$ | Sucrose    |
