# Supplementary figures and images for: Reformulating atmospheric aerosol thermodynamics and hygroscopic growth into fog, haze and clouds
Source: Copernicus journal article supplement (doi:10.5194/acp-7-3163-2007), 2007-06-20

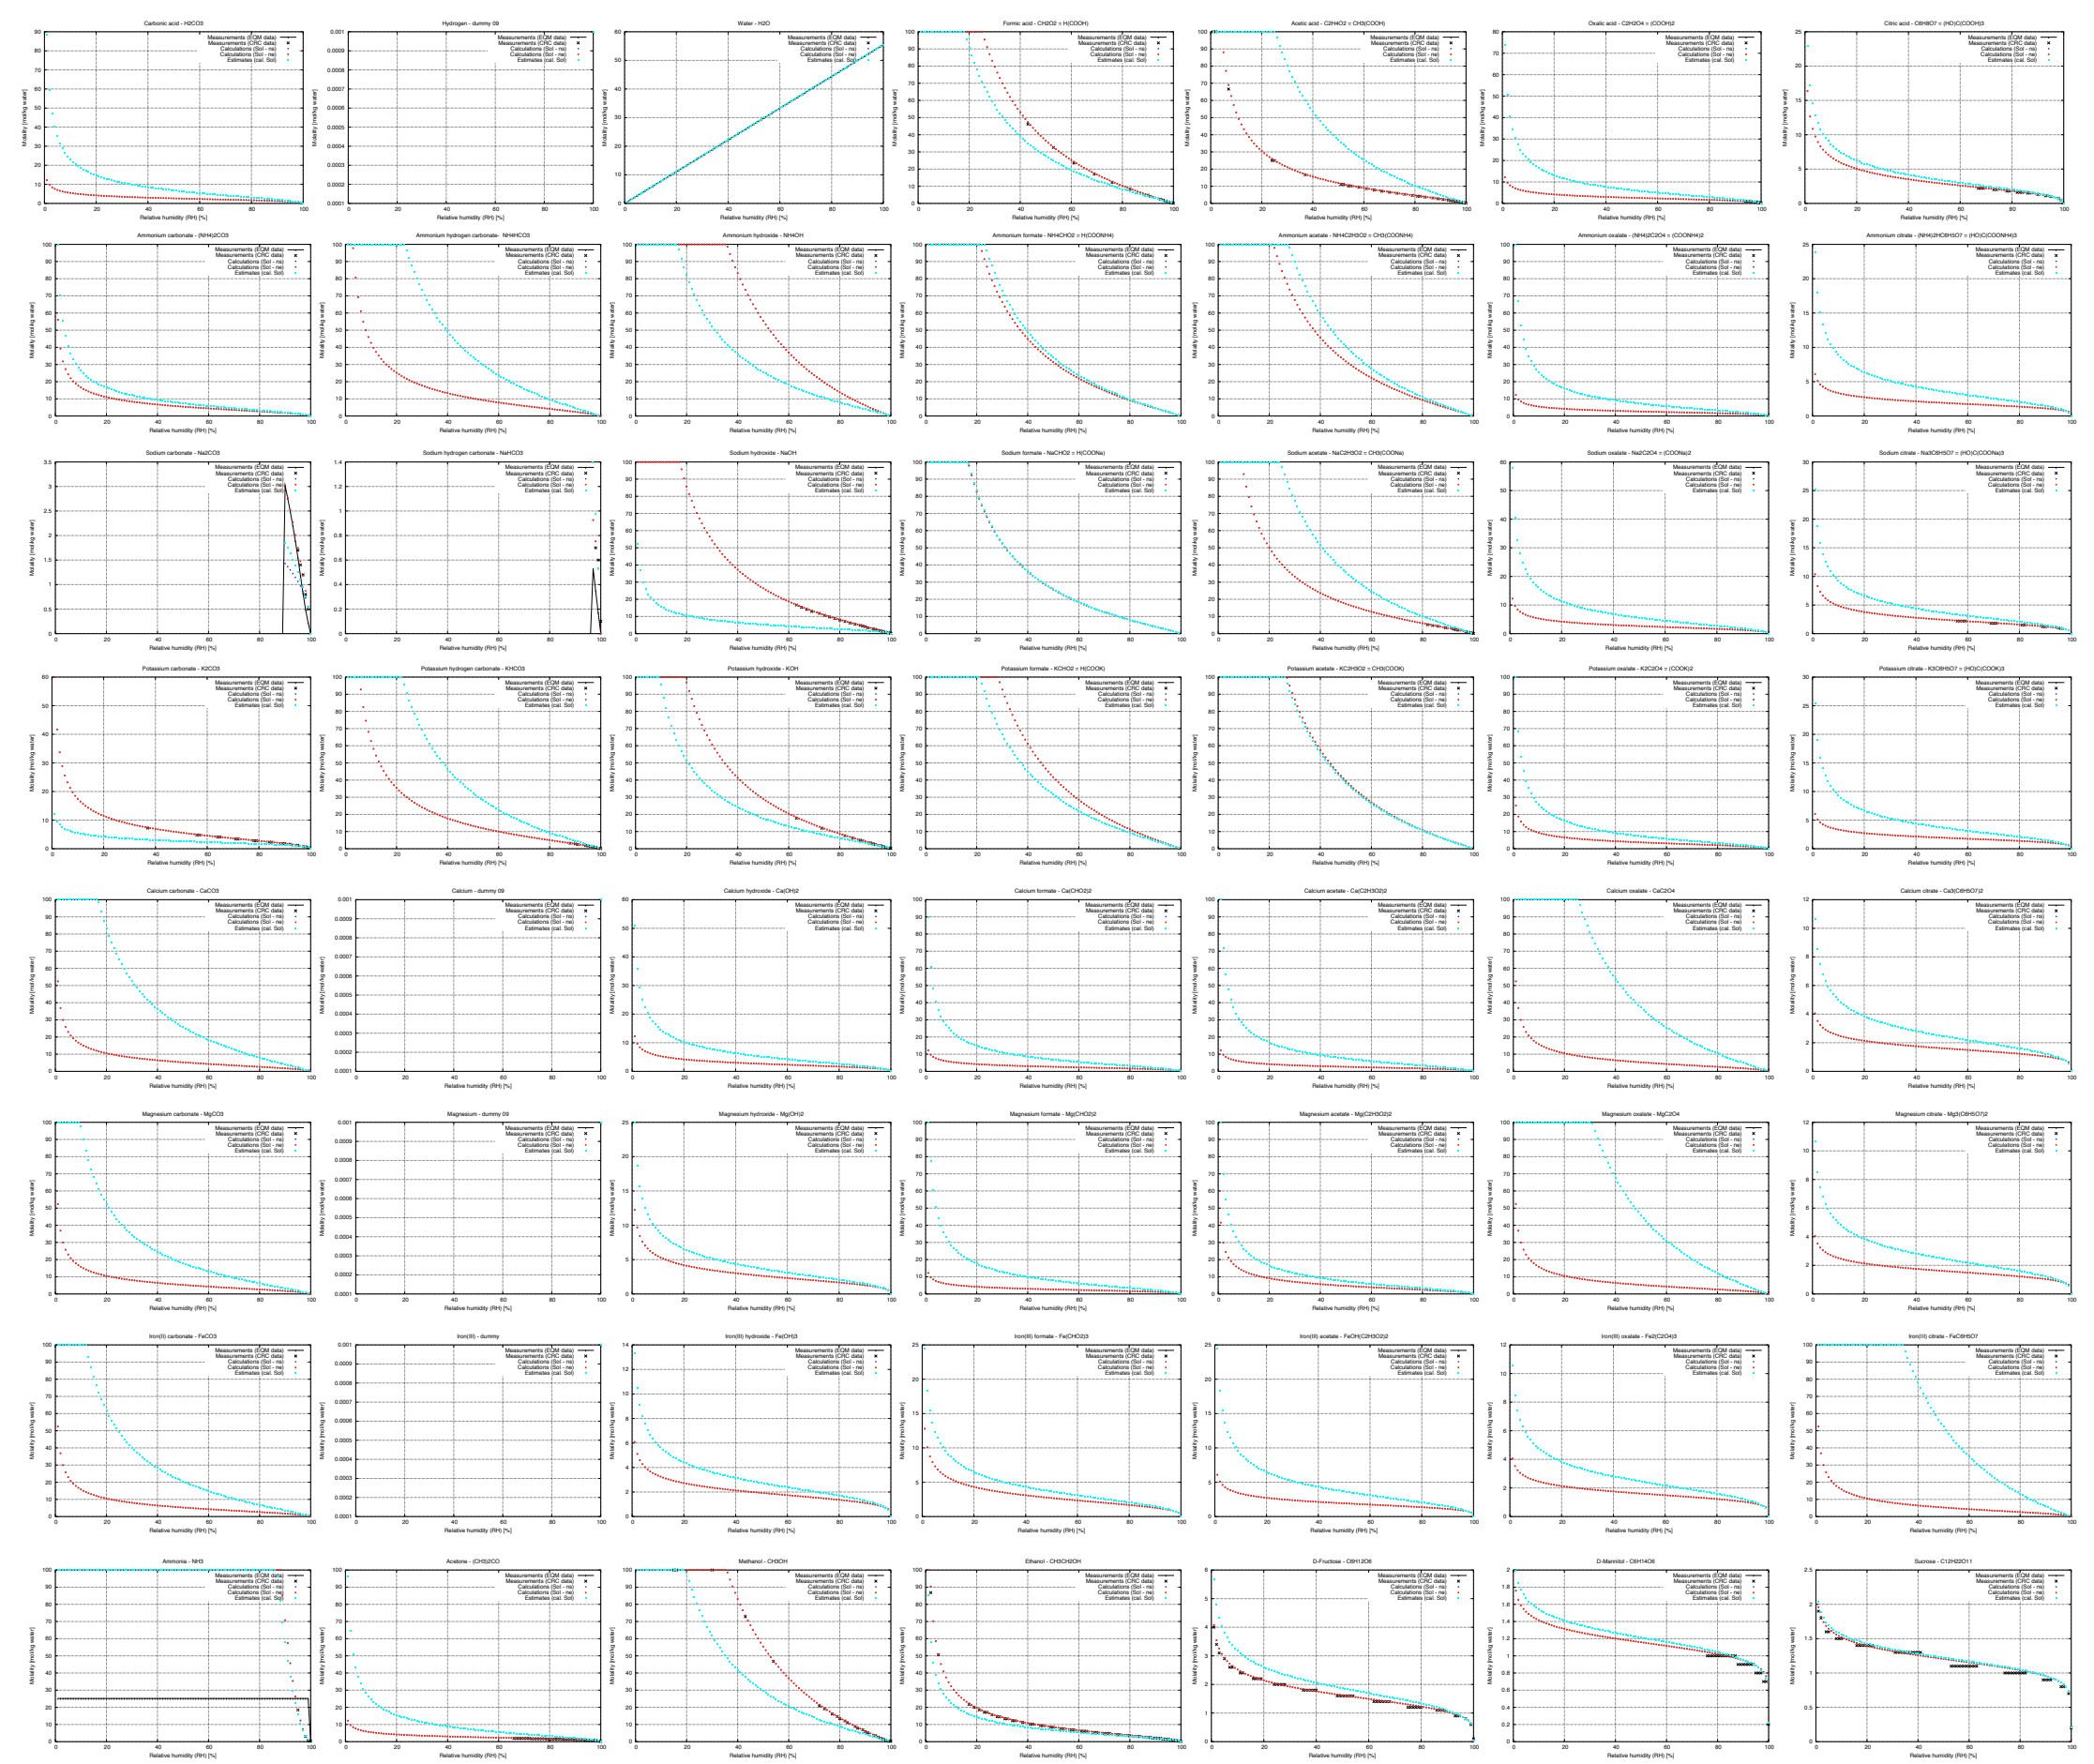

Supplement: Supplementary file 1 [file acp-7-3163-2007-supplement.zip]

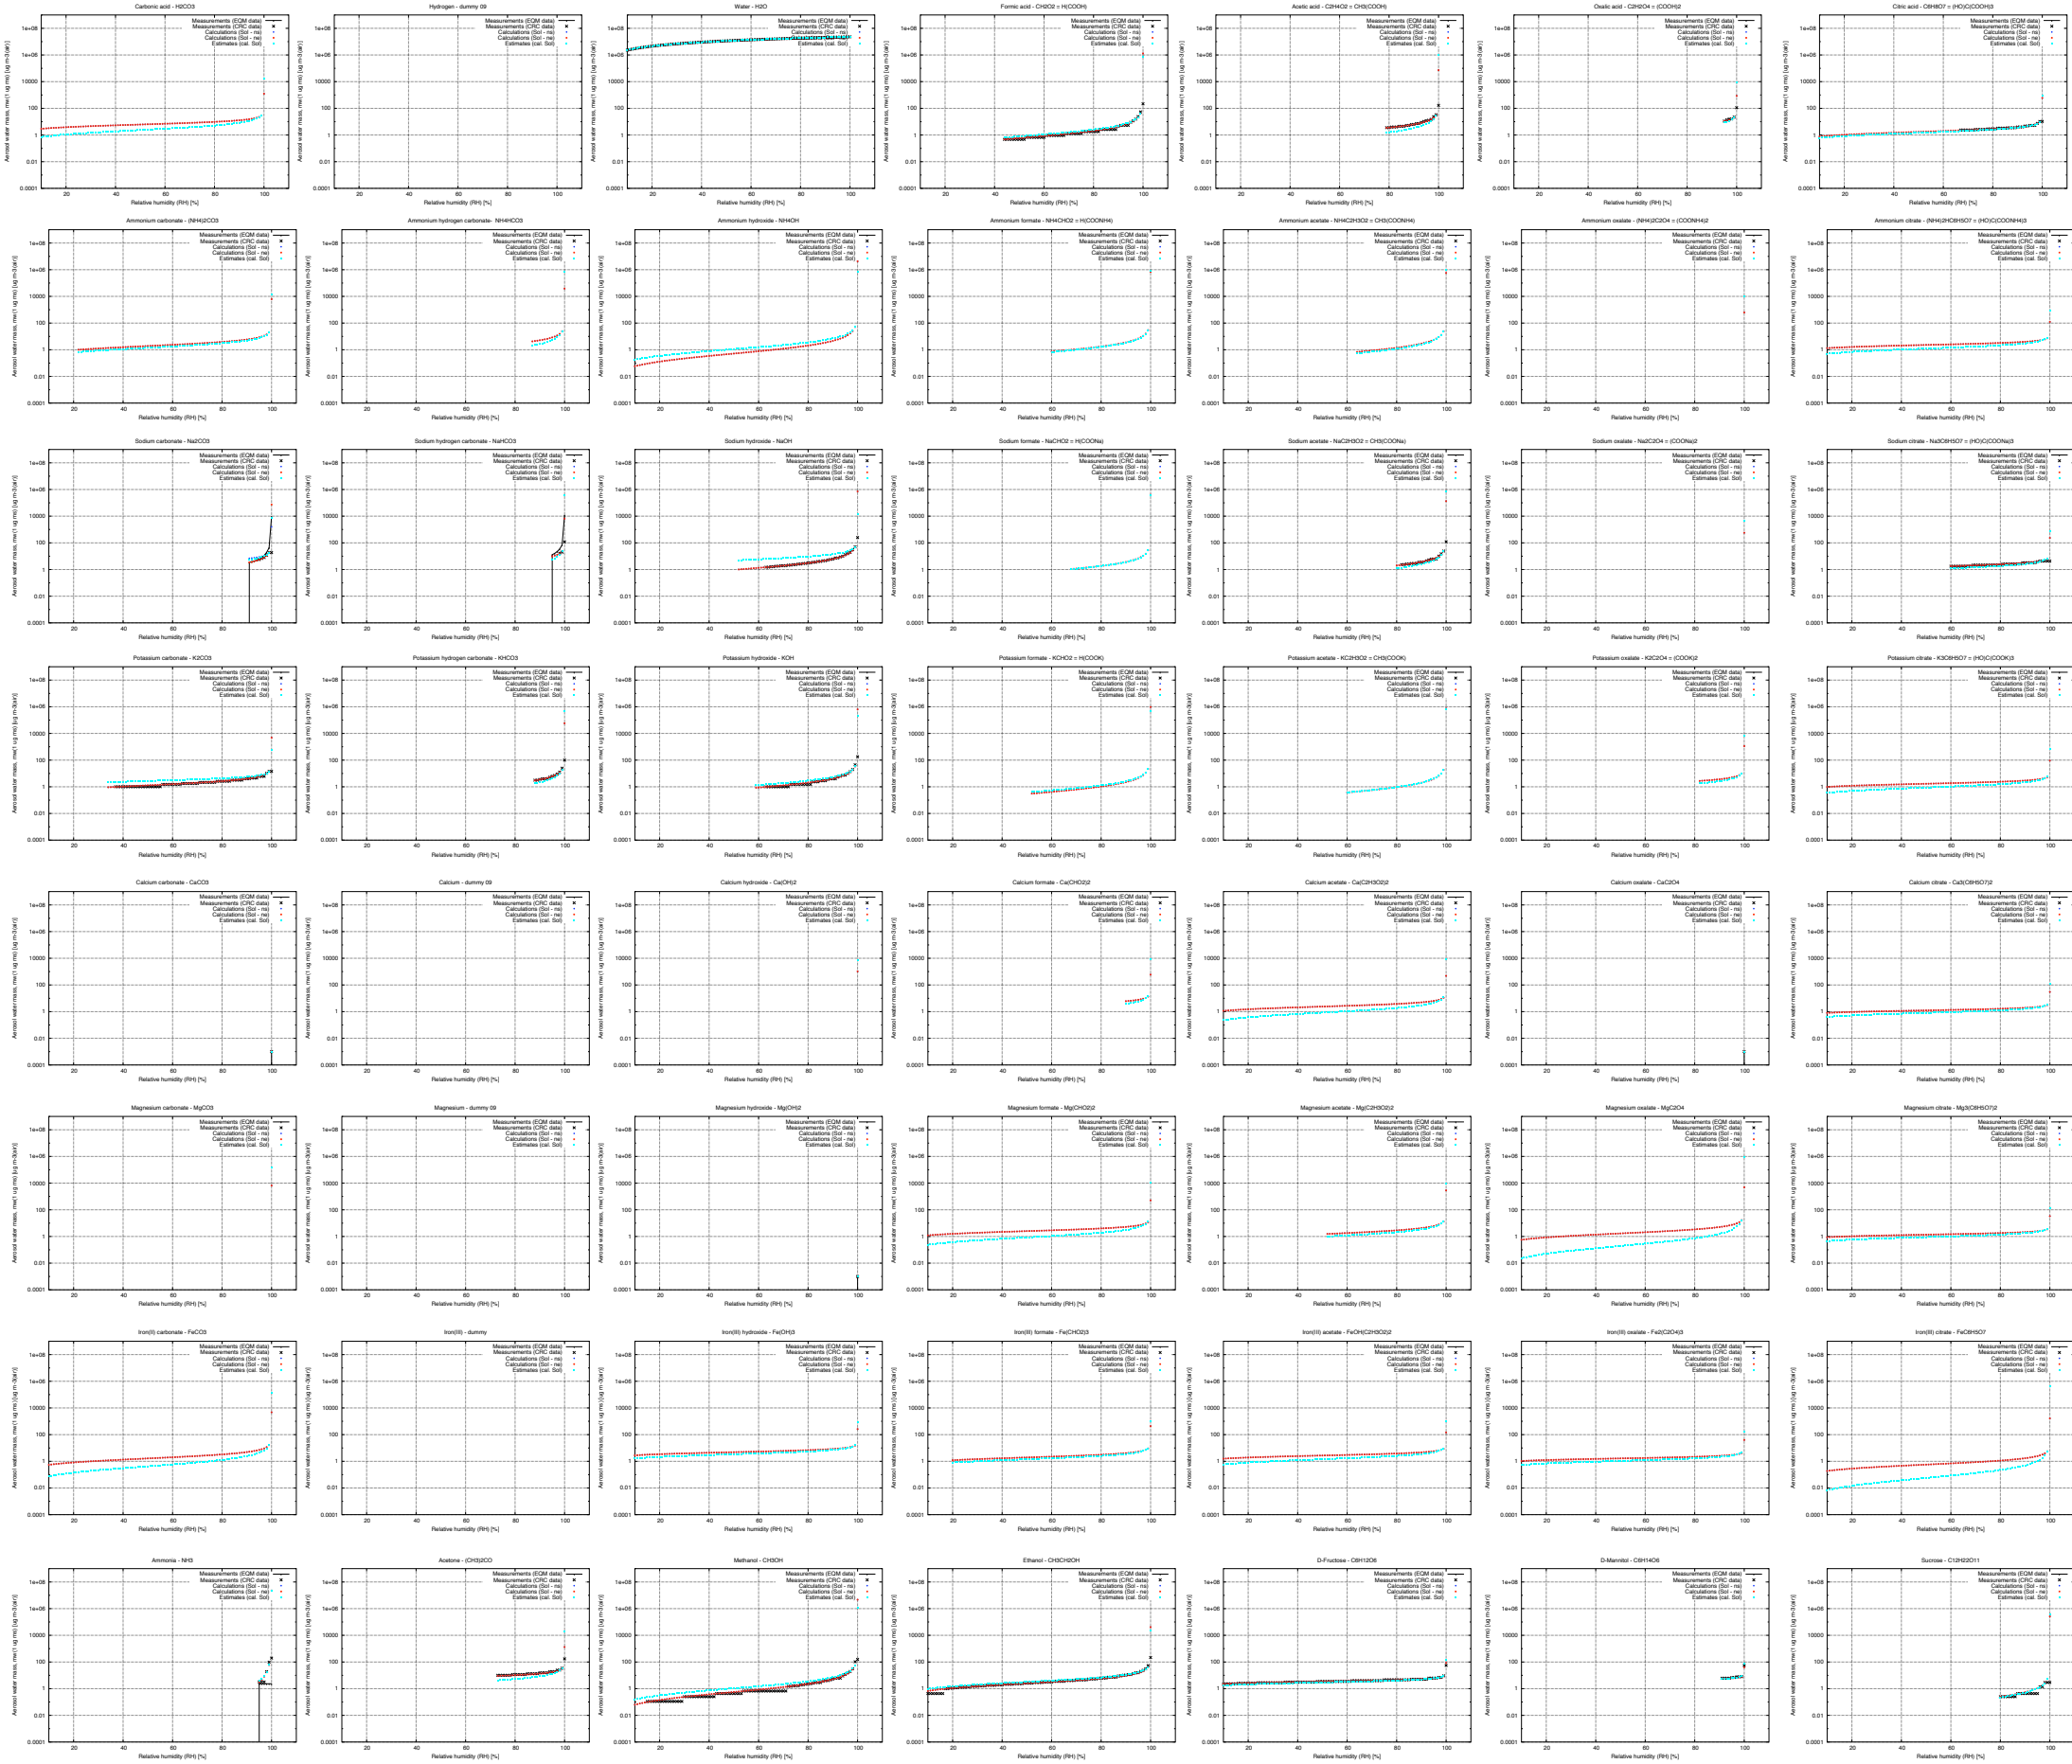

Supplement: Supplementary file 3 [file acp-7-3163-2007-supplement.zip]

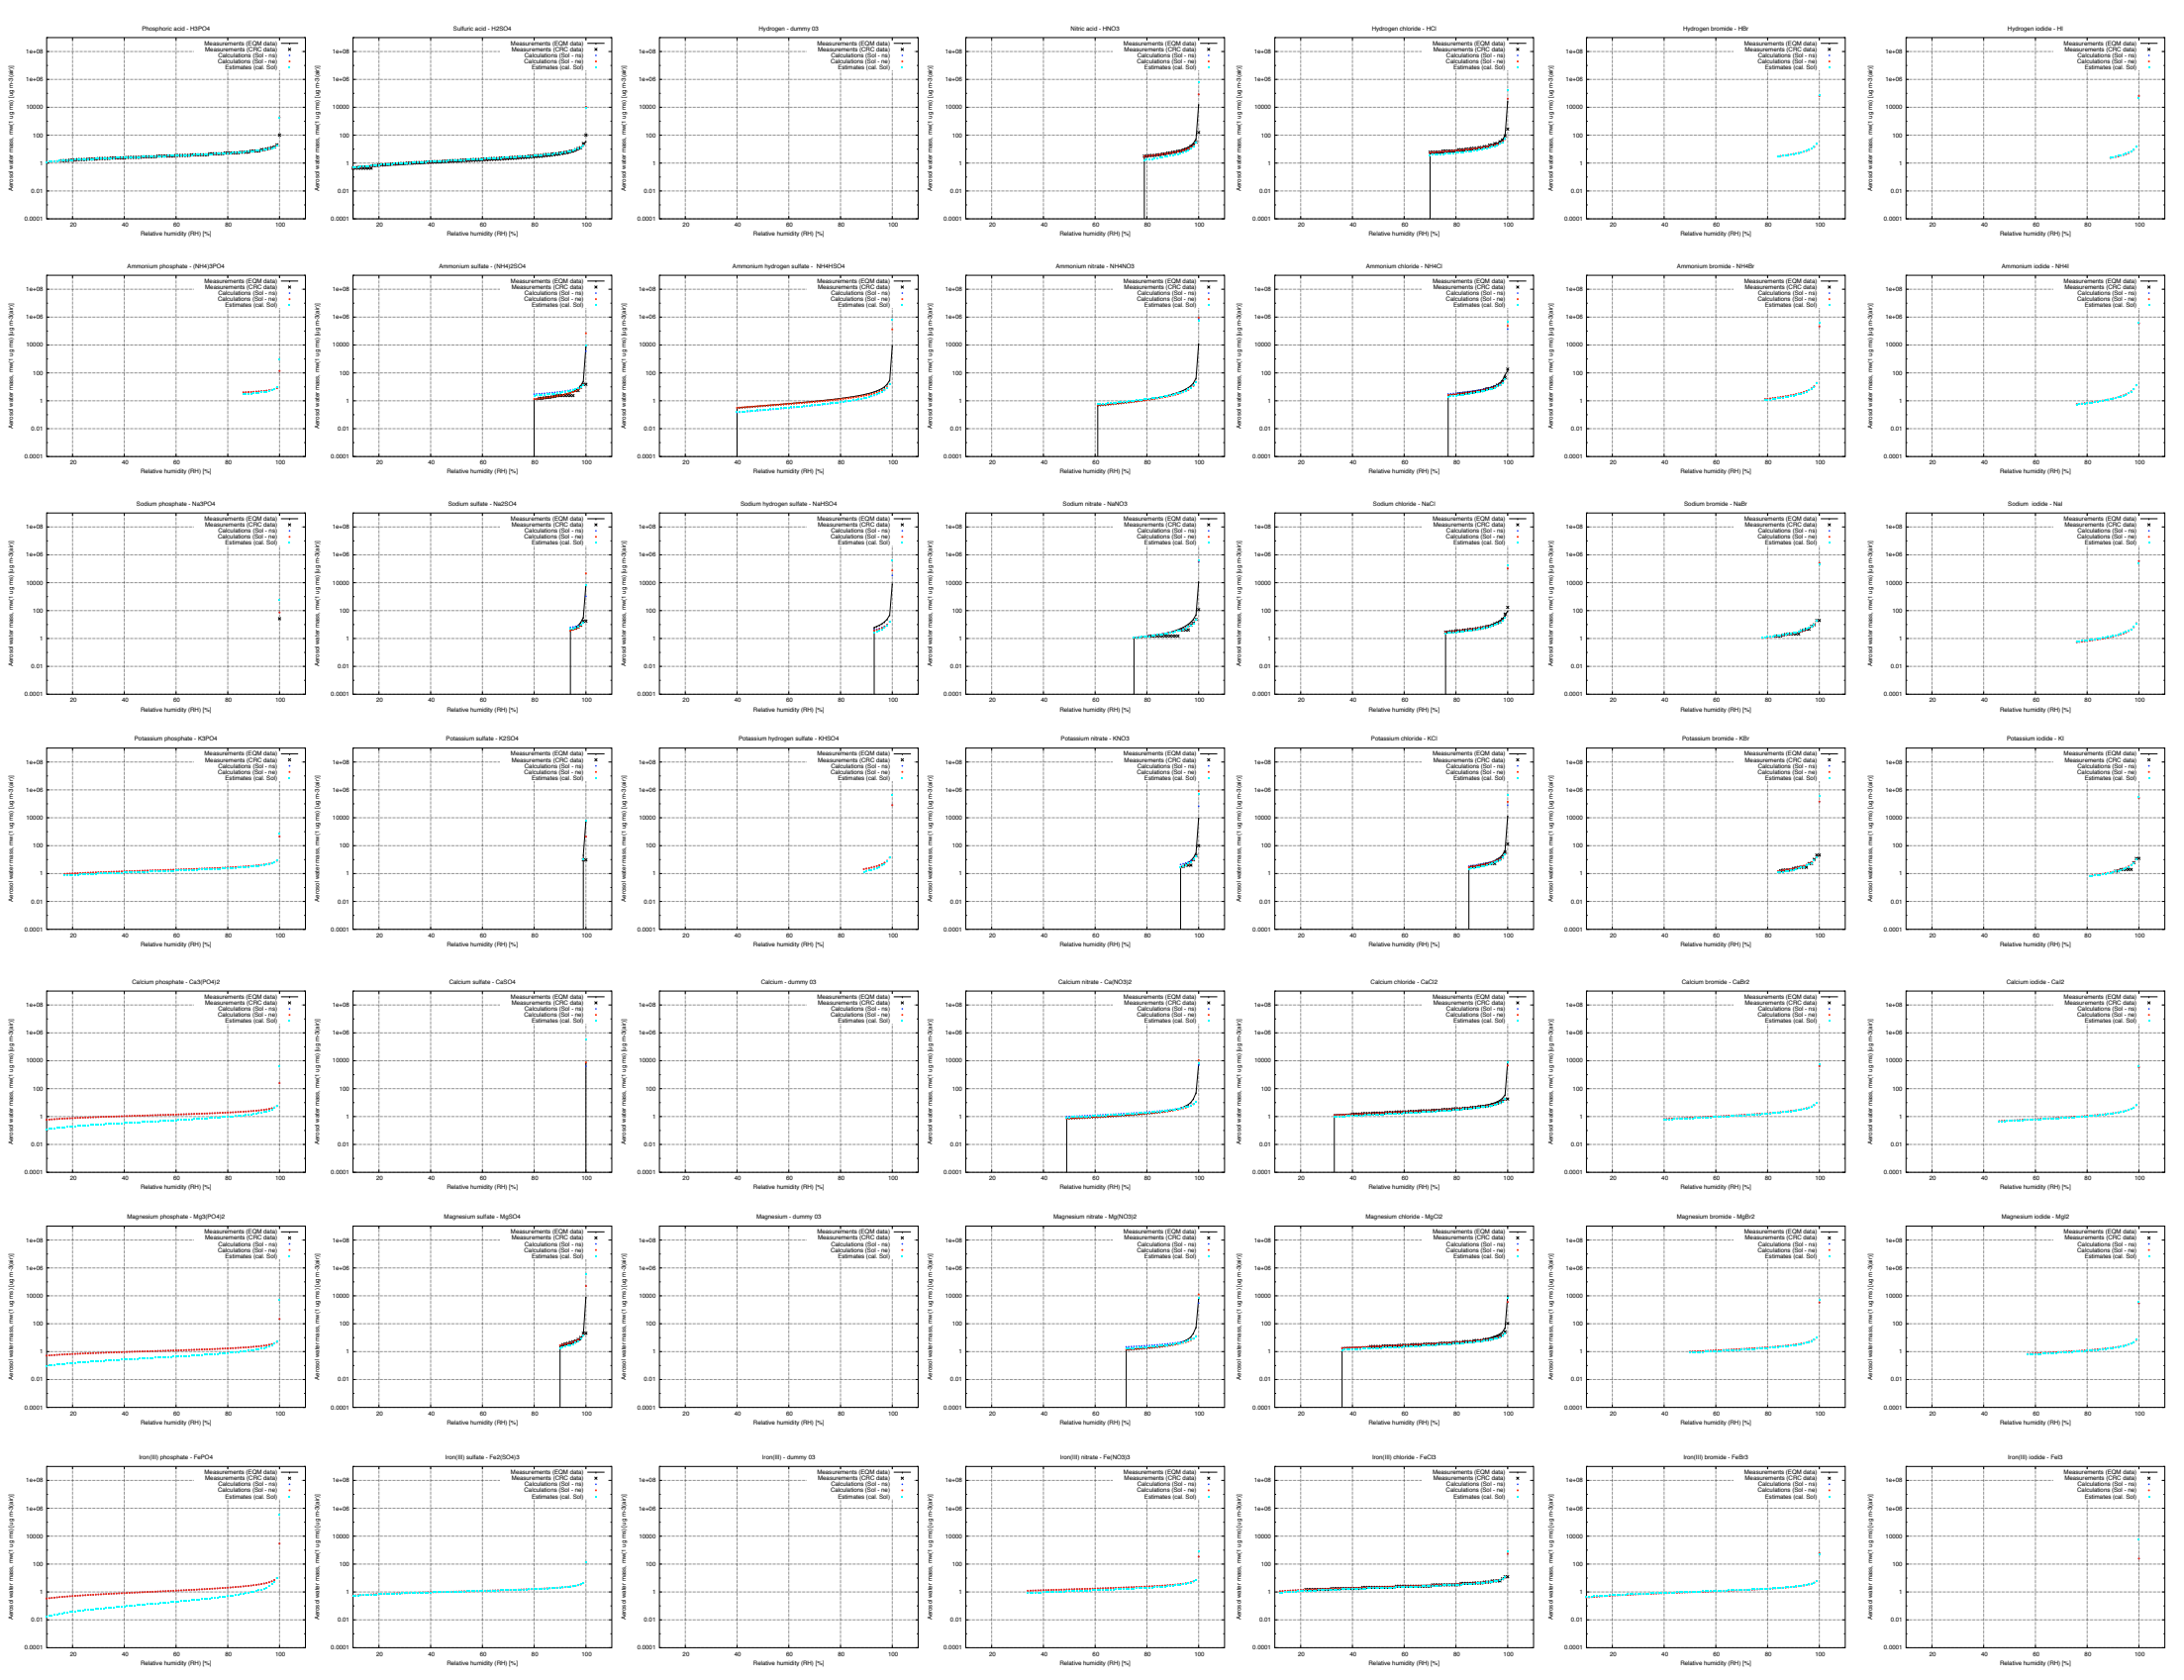

Supplement: Supplementary file 4 [file acp-7-3163-2007-supplement.zip]

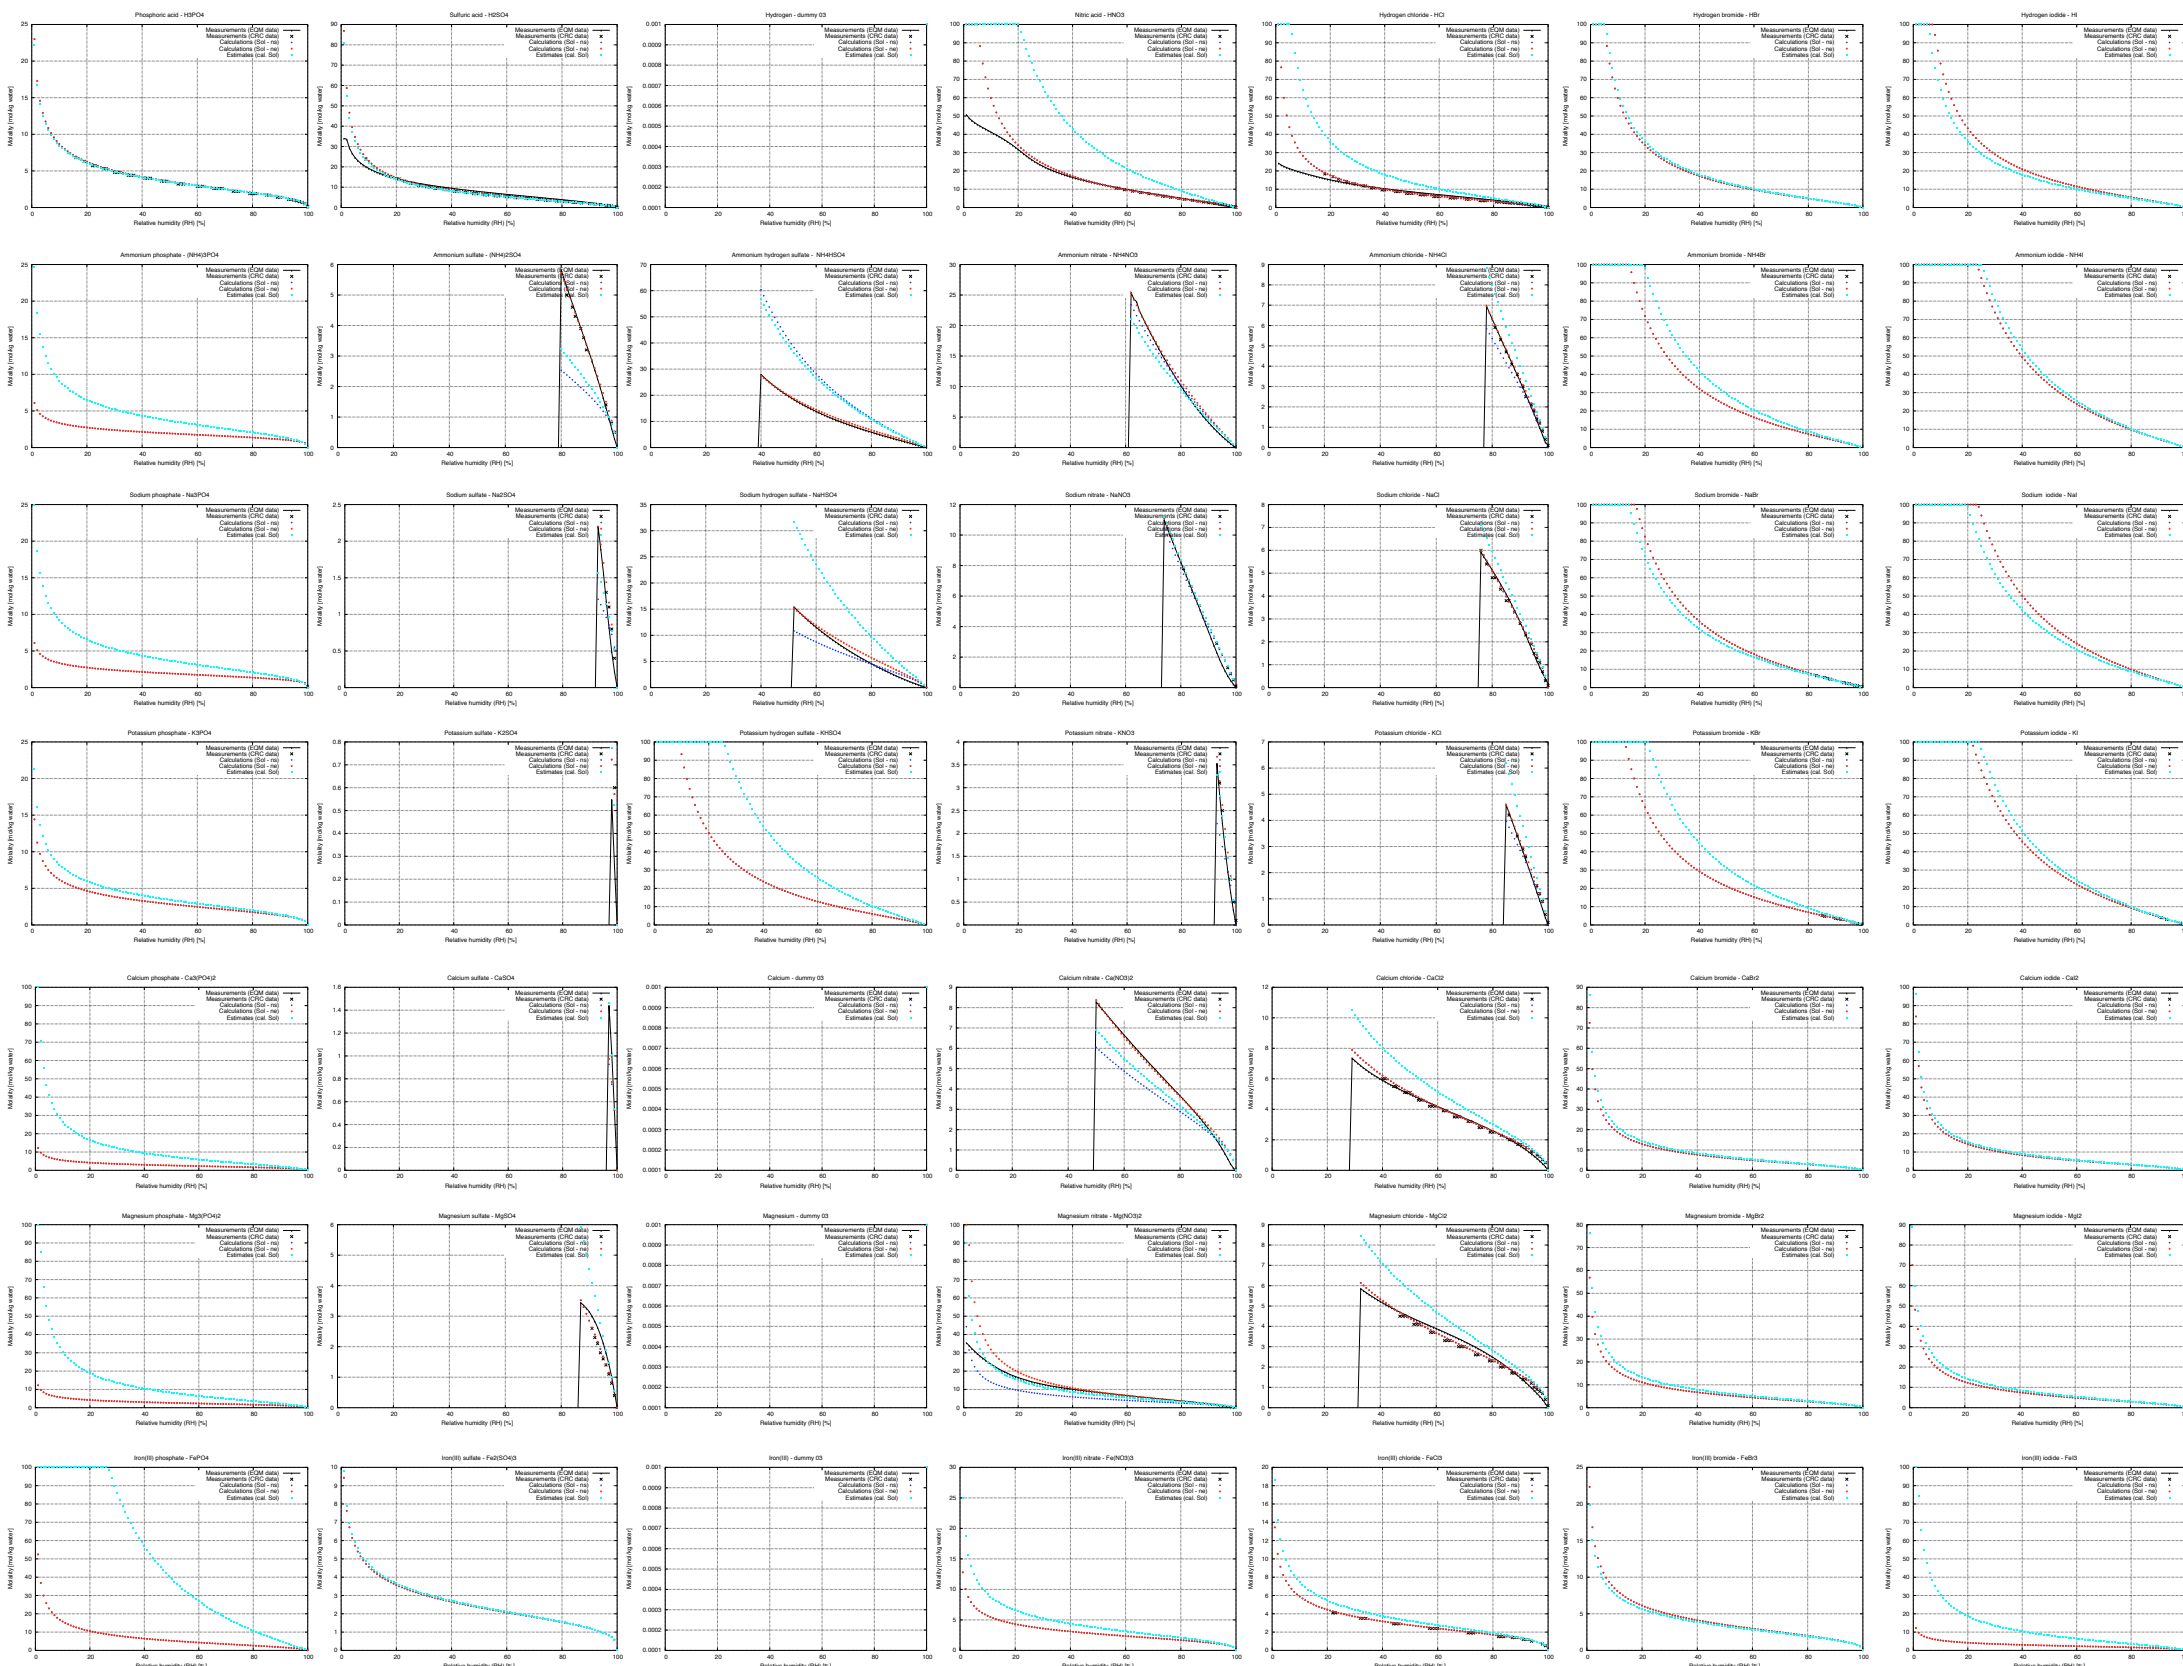

Supplement: Supplementary file 6 [file acp-7-3163-2007-supplement.zip]
